# Supplementary material for: Proteomic Profiling of Lysine Acetylation Indicates Mitochondrial Dysfunction in the Hippocampus of Gut Microbiota-Absent Mice
Source: Front Mol Neurosci. 2021 Mar 11;14:594332. doi: 10.3389/fnmol.2021.594332 (PMC7991600; doi:10.3389/fnmol.2021.594332)
Supplement: Supplementary Figure 1 — GO functional classification of the identified acetylated proteins. [file Data_Sheet_1.ZIP]

Archive with 8 entries (7 files):
- Supplementary Material/
- Supplementary Material/Supplementary Figure 1.jpg
- Supplementary Material/Supplementary Table S1.xlsx
- Supplementary Material/Supplementary Table S2.xlsx
- Supplementary Material/Supplementary Table S3.xlsx
- Supplementary Material/Supplementary Table S4.xlsx
- Supplementary Material/Supplementary Table S5.xlsx
- Supplementary Material/Supplementary Table S6.xlsx
