# Supplementary material for: Proteomic Profiling of Lysine Acetylation Indicates Mitochondrial Dysfunction in the Hippocampus of Gut Microbiota-Absent Mice
Source: Front Mol Neurosci. 2021 Mar 11;14:594332. doi: 10.3389/fnmol.2021.594332 (PMC7991600; doi:10.3389/fnmol.2021.594332)
Supplement: Supplementary Figure 1 — GO functional classification of the identified acetylated proteins. [file Data_Sheet_1.ZIP › Supplementary Material/Supplementary Table S1.xlsx]

## Sheet: Sheet1
Table S1. Detailed information on identified acetylated peptides in mouse.
Protein accession	Position	Amino acid	Protein names	Gene names	Score	Modified sequence	Mass error [ppm]	Charge	m/z	A			B			A/B Ratio	A/B P value
P68254	74	K	14-3-3 protein theta	Ywhaq	66.692	_TDTSDK(ac)K_	-3.1022	2	418.703	0.501253	0.541353	0.581454	1.42356	1.34837	1.53885	0.376744	0.00118145
P83917	84	K	Chromobox protein homolog 1	Cbx1	68.972	_TAHETDKSEGGK(ac)R_	0.26847	3	486.571	0.56444	0.561618	0.558796	1.5635	1.32079	1.28692	0.403924	0.0108436
P63101	74	K	14-3-3 protein zeta/delta	Ywhaz	87.476	_TEGAEK(ac)K_	-1.335	2	402.709	0.675676	0.672297	0.668919	1.25676	1.40541	1.27027	0.512887	0.00541617
P09405	15	K	Nucleolin	Ncl	101.54	_THGEAK(ac)K_	-0.1475	2	406.717	0.726392	0.719128	0.711864	1.28571	1.24939	1.27845	0.565714	8.10467e-05
Q9D0J8	15	K	Parathymosin	Ptms	169.92	_SVEAAAELSAK(ac)DLK_	0.090868	3	491.931	0.760456	0.745247	0.730038	1.28517	1.1635	1.43726	0.575342	0.0190796
P0C0S6	14	K	Histone H2A.Z	H2afz	98.943	_AGK(ac)DSGK(ac)AK(ac)TK_	-0.4055	2	608.83	0.774194	0.747097	0.72	1.23871	1.18452	1.40129	0.586032	0.0113942
P0C0S6	8	K	Histone H2A.Z	H2afz	143.97	_AGK(ac)DSGK(ac)AK(ac)TK_	-0.4055	2	608.83	0.765306	0.772959	0.780612	1.22449	1.23214	1.27041	0.622177	0.000350308
P0C0S6	5	K	Histone H2A.Z	H2afz	143.97	_AGGK(ac)AGK(ac)DSGK(ac)AK_	0.4411	2	650.846	0.755668	0.774559	0.793451	1.23174	1.22418	1.26952	0.623732	2.05829e-05
P0C0S6	12	K	Histone H2A.Z	H2afz	143.97	_AGK(ac)DSGK(ac)AK(ac)TK_	-0.4055	2	608.83	0.78125	0.78125	0.78125	1.20312	1.22656	1.26562	0.634249	0.0016332
B2RWS6	1559	K	Histone acetyltransferase p300	Ep300	143.58	_NNK(ac)K(ac)TSK(ac)NK(ac)SSLSR_	0.65996	3	587.315	0.75662	0.851198	0.945776	1.27869	1.23329	1.49054	0.637996	0.0100746
P31786	51	K	Acyl-CoA-binding protein	Dbi	158.52	_QATVGDVNTDRPGLLDLK(ac)GK_	-1.9249	3	713.718	0.791557	0.779683	0.76781	1.25066	1.19525	1.219	0.638229	0.000269942
P16546	2205	K	Spectrin alpha chain, non-erythrocytic 1	Sptan1	68.355	_RQEENDK(ac)LR_	-0.0060294	2	615.315	0.767263	0.751918	0.736573	1.21228	1.09719	1.15857	0.650442	0.00433822
Q8R1M2	6	K	Histone H2A.J	H2afj	128.12	_GK(ac)QGGK(ac)VR_	0.10976	2	457.264	0.792602	0.804491	0.81638	1.1889	1.17305	1.19683	0.678174	2.59934e-06
Q8R1M2	10	K	Histone H2A.J	H2afj	128.12	_GK(ac)QGGK(ac)VR_	0.10976	2	457.264	0.792602	0.804491	0.81638	1.1889	1.17305	1.19683	0.678174	2.59934e-06
P49312	105	K	Heterogeneous nuclear ribonucleoprotein A1	Hnrnpa1	94.717	_EDSQRPGAHLTVK(ac)K_	0.59147	4	402.718	0.8	0.788	0.776	1.208	1.128	1.12	0.684028	0.00399642
Q93092	286	K	Transaldolase	Taldo1	136.39	_AAQTSDSEK(ac)IHLDEK_	-0.65651	3	571.948	0.779221	0.822078	0.864935	1.23896	1.19221	1.12987	0.69256	0.00104872
P97450	99	K	ATP synthase-coupling factor 6, mitochondrial	Atp5j	110.12	_FDDPK(ac)FEVIDKPQS_	1.7445	2	853.917	0.854701	0.820513	0.786325	1.11966	1.21368	1.19658	0.697337	0.000969073
Q8C1B7	378	K	Septin-11	Sept11	149.65	_THQEEK(ac)K_	0.13697	2	471.238	0.859599	0.833811	0.808023	1.16046	1.16905	1.22923	0.702899	0.000362321
P61982	77	K	14-3-3 protein gamma	Ywhag	115.41	_TSADGNEK(ac)K_	1.6934	2	496.238	0.853485	0.84495	0.836415	1.20341	1.17781	1.20341	0.707143	2.89566e-05
P02088	96	K	Hemoglobin subunit beta-1	Hbb-b1	213.15	_GTFASLSELHCDK(ac)LHVDPENFR_	0.4803	4	654.314	0.730816	0.803898	0.876979	1.18392	1.162	1.04507	0.711207	0.00565344
Q9D1I5	152	K	Methylmalonyl-CoA epimerase, mitochondrial	Mcee	133.15	_SLSDEAK(ac)IGAHGK_	0.95051	2	677.852	0.794702	0.81457	0.834437	1.10464	1.08874	1.21589	0.716783	0.0104173
P45481	1598	K	CREB-binding protein	Crebbp	223.38	_NNK(ac)K(ac)TNK(ac)NK(ac)SSISR_	0.57873	2	893.974	0.815217	0.860054	0.904891	1.16576	1.11685	1.19837	0.741218	0.00105997
B2RWS6	1554	K	Histone acetyltransferase p300	Ep300	143.58	_NNK(ac)K(ac)TSK(ac)NK(ac)SSLSR_	0.65996	3	587.315	0.864553	0.89049	0.916427	1.16715	1.14121	1.28818	0.742788	0.0138148
B2RWS6	1557	K	Histone acetyltransferase p300	Ep300	143.58	_NNK(ac)K(ac)TSK(ac)NK(ac)SSLSR_	0.65996	3	587.315	0.864553	0.89049	0.916427	1.16715	1.14121	1.28818	0.742788	0.0138148
P07724	543	K	Serum albumin	Alb	144.3	_AETFTFHSDICTLPEK(ac)EK_	0.40137	3	732.349	0.827586	0.852414	0.877241	1.1669	1.08414	1.19172	0.742788	0.00503205
P40630	70	K	Transcription factor A, mitochondrial	Tfam	55.531	_AK(ac)HPDAK_	-0.41108	3	270.149	0.867052	0.849711	0.83237	1.0578	1.19653	1.15318	0.748092	0.0155928
Q9CR98	89	K	Protein FAM136A	Fam136a	88.596	_CTMHCNDK(ac)AK_	-0.49886	3	436.183	0.765306	0.84949	0.933673	1.17092	1.13265	1.09439	0.75	0.0156501
B2RWS6	1549	K	Histone acetyltransferase p300	Ep300	98.156	_GDSK(ac)NAK(ac)K(ac)K_	-0.26852	2	551.299	0.882353	0.882353	0.882353	1.06765	1.23529	1.2	0.755668	0.0305331
P09602	11	K	Non-histone chromosomal protein HMG-17	Hmgn2	71.085	_KAEGDAK(ac)GDK_	0.21271	3	354.18	0.903614	0.862952	0.822289	1.15663	1.08434	1.13855	0.766043	0.00121361
O88569	112	K	Heterogeneous nuclear ribonucleoproteins A2/B1	Hnrnpa2b1	86.214	_EESGKPGAHVTVK(ac)K_	0.16947	3	503.607	0.949367	0.868671	0.787975	1.15823	1.12975	1.11076	0.76676	0.0223777
Q99K85	116	K	Phosphoserine aminotransferase	Psat1	91.318	_AAEEAK(ac)K_	-0.71357	2	394.711	0.868307	0.863965	0.859624	1.1288	1.11143	1.11143	0.773316	7.38251e-05
Q68FD5	456	K	Clathrin heavy chain 1	Cltc	91.589	_WLKEDK(ac)LECSEELGDLVK_	-0.57073	4	559.032	0.917431	0.885321	0.853211	1.04587	1.15596	1.17431	0.786685	0.0143767
P09405	9	K	Nucleolin	Ncl	78.903	_AGK(ac)THGEAK(ac)K_	0.44039	2	555.799	0.931677	0.86646	0.801242	1.11801	1.04348	1.09006	0.799427	0.0131721
Q8BLK3	194	K	Limbic system-associated membrane protein	Lsamp	102.4	_EQSGK(ac)YECK_	0.3614	2	585.758	0.894188	0.916542	0.938897	1.12668	1.09091	1.2161	0.800781	0.0170977
P84244	10	K	Histone H3.3	H3f3a	136.49	_K(ac)STGGK(ac)APR_	-2.8308	3	329.186	0.862069	0.892241	0.922414	1.07759	1.07759	1.16379	0.806494	0.00586737
P84244	15	K	Histone H3.3	H3f3a	136.49	_K(ac)STGGK(ac)APR_	-2.8308	3	329.186	0.862069	0.892241	0.922414	1.07759	1.07759	1.16379	0.806494	0.00586737
Q8VEM8	94	K	Phosphate carrier protein, mitochondrial	Slc25a3	64.82	_M(ox)QVDPQK(ac)YK_	-0.052913	2	597.795	0.936037	0.907956	0.879875	1.13261	1.039	1.13261	0.824363	0.0117517
Q7TMB8	182	K	Cytoplasmic FMR1-interacting protein 1	Cyfip1	102.87	_CSVK(ac)NDHSAYK_	-0.33773	3	450.875	0.903614	0.908133	0.912651	1.11145	1.12048	1.06627	0.826027	0.00656009
Q6IE82	32	K	Protein Jade-3	Jade3	87.184	_SK(ac)NPK(ac)EQK_	0.33528	3	348.189	0.892857	0.90625	0.919643	1.08036	1.10714	1.09821	0.827446	6.83705e-05
Q6IE82	35	K	Protein Jade-3	Jade3	87.184	_SK(ac)NPK(ac)EQK_	0.33528	3	348.189	0.892857	0.90625	0.919643	1.08036	1.10714	1.09821	0.827446	6.83705e-05
Q921G7	133	K	Electron transfer flavoprotein-ubiquinone oxidoreductase, mitochondrial	Etfdh	111.78	_EK(ac)GAPLNTPVTEDR_	-1.4102	2	784.899	1.10497	1.08287	1.06077	0.917127	0.939227	0.850829	1.2	0.00987568
P54071	155	K	Isocitrate dehydrogenase [NADP], mitochondrial	Idh2	129.89	_EPIICK(ac)NIPR_	0.48045	3	427.904	1.06762	1.09964	1.13167	0.939502	0.907473	0.896797	1.20233	0.00193227
Q9D3D9	165	K	ATP synthase subunit delta, mitochondrial	Atp5d	62.298	_IEANEALVK(ac)ALE_	-1.9565	2	671.367	0.943396	0.976415	1.00943	0.867925	0.820755	0.745283	1.20349	0.0257362
P70336	469	K	Rho-associated protein kinase 2	Rock2	86.898	_EELEQK(ac)CK_	-1.5874	2	553.263	1.09091	1.08545	1.08	0.894545	0.927273	0.883636	1.20363	0.0034298
P62806	60	K	Histone H4	Hist1h4a	91.62	_GVLK(ac)VFLENVIR_	1.0816	2	714.932	1.00503	1.08543	1.16583	0.904523	0.854271	0.944724	1.20446	0.0376534
Q99KI0	577	K	Aconitate hydratase, mitochondrial	Aco2	147.7	_WDGK(ac)DLEDLQILIK_	1.2459	2	864.464	1.0274	1.04795	1.06849	0.873288	0.832192	0.90411	1.20472	0.00415127
Q91VM9	219	K	Inorganic pyrophosphatase 2, mitochondrial	Ppa2	104.22	_FHDIDDVK(ac)K_	0.80367	3	386.865	1.10497	1.08287	1.06077	0.850829	0.906077	0.939227	1.20492	0.00833822
Q9R0Q7	33	K	Prostaglandin E synthase 3	Ptges3	112.44	_DVNVNFEK(ac)SK_	0.85456	3	407.875	1.11317	1.15213	1.19109	0.979592	0.979592	0.90167	1.20817	0.00474213
Q6PB66	462	K	Leucine-rich PPR motif-containing protein, mitochondrial	Lrpprc	125.53	_NVQGIIDILK(ac)IMNK_	1.8725	3	547.652	1.04348	1.05913	1.07478	0.813913	0.93913	0.876522	1.20833	0.0308192
Q3UFF7	221	K	Lysophospholipase-like protein 1	Lyplal1	99.442	_TELEK(ac)LK_	-3.0479	2	451.763	1.0929	1.06557	1.03825	0.918033	0.885246	0.84153	1.20868	0.00356993
Q8BWF0	123	K	Succinate-semialdehyde dehydrogenase, mitochondrial	Aldh5a1	90.707	_WYDLMIQNK(ac)DDLAK_	1.4499	3	598.963	1.12994	1.0791	1.02825	0.949153	0.903955	0.824859	1.20886	0.0176649
Q8R4N0	80	K	Citrate lyase subunit beta-like protein, mitochondrial	Clybl	169.92	_VDCAVLDCEDGVAENK(ac)K_	-0.92211	2	982.44	1.13208	1.08679	1.04151	0.871698	0.90566	0.916981	1.21008	0.0076489
Q8CAQ8	435	K	MICOS complex subunit Mic60	Immt	96.82	_QHIELALEK(ac)HK_	1.4528	3	463.261	1.08696	1.09783	1.1087	0.902174	0.902174	0.913043	1.212	7.3661e-05
P06151	57	K	L-lactate dehydrogenase A chain	Ldha	147.64	_DLADELALVDVM(ox)EDK(ac)LK_	-0.65816	3	659.003	1.10906	1.10351	1.09797	0.898336	0.909427	0.920518	1.21341	0.000126835
Q9DCX2	149	K	ATP synthase subunit d, mitochondrial	Atp5h	104.7	_K(ac)YPYWPHQPIENL_	0.22624	2	863.933	1.09689	1.09141	1.08592	0.91042	0.833638	0.954296	1.21341	0.0312576
Q9R0X4	155	K	Acyl-coenzyme A thioesterase 9, mitochondrial	Acot9	162.46	_IDM(ox)CK(ac)HSLSPEQDIK_	-2.9367	3	620.294	1.0929	1.08743	1.08197	0.874317	0.907104	0.907104	1.21341	0.00174155
P60904	56	K	DnaJ homolog subfamily C member 5	Dnajc5	155.1	_YHPDKNPDNPEAADK(ac)FK_	-0.41218	4	507.742	1.06383	1.10638	1.14894	0.893617	0.957447	0.882979	1.21401	0.00453272
Q99KI0	517	K	Aconitate hydratase, mitochondrial	Aco2	137.61	_FNPETDFLTGK(ac)DGK(ac)K_	-1.4066	3	594.297	1.0772	1.08259	1.08797	0.861759	0.894075	0.915619	1.21573	0.00512479
Q9CQ54	104	K	NADH dehydrogenase [ubiquinone] 1 subunit C2	Ndufc2	79.23	_LHPEDFPEK(ac)EK_	-2.3785	3	470.902	1.15163	1.11708	1.08253	0.978887	0.932821	0.840691	1.21757	0.023013
Q8R0Y6	733	K	Cytosolic 10-formyltetrahydrofolate dehydrogenase	Aldh1l1	92.538	_VVEEVGK(ac)MK_	2.1268	3	354.195	1.00334	1.06856	1.13378	0.862876	0.87291	0.892977	1.21947	0.0307312
Q8K2B3	615	K	Succinate dehydrogenase [ubiquinone] flavoprotein subunit, mitochondrial	Sdha	135.09	_VDEYDYSKPIQGQQK(ac)K_	-1.4755	3	656.662	1.1215	1.17757	1.23364	1.00935	0.953271	0.930841	1.22093	0.00772331
P20108	84	K	Thioredoxin-dependent peroxide reductase, mitochondrial	Prdx3	133.78	_GTAVVNGEFK(ac)ELSLDDFK_	0.58027	3	671.005	1.13422	1.1172	1.10019	0.89603	0.941399	0.907372	1.22107	0.000463817
P18872	98	K	Guanine nucleotide-binding protein G(o) subunit alpha	Gnao1	132.08	_AMDTLGVEYGDK(ac)ER_	-1.1269	2	813.377	1.0327	1.11532	1.19793	0.898451	0.877797	0.960413	1.22264	0.0323339
Q99KI0	520	K	Aconitate hydratase, mitochondrial	Aco2	128.74	_FNPETDFLTGK(ac)DGK(ac)K_	-1.4066	3	594.297	1.1257	1.09193	1.05816	0.866792	0.934334	0.878049	1.22269	0.00228031
O35658	88	K	Complement component 1 Q subcomponent-binding protein, mitochondrial	C1qbp	146.79	_AFVEFLTDEIK(ac)EEK_	0.16845	3	580.629	1.0327	1.09466	1.15663	0.815835	0.939759	0.929432	1.22308	0.0205795
Q9DCX2	95	K	ATP synthase subunit d, mitochondrial	Atp5h	179.97	_YTALVDQEEK(ac)EDVK_	1.9818	2	854.917	1.08108	1.10811	1.13514	0.92973	0.886486	0.897297	1.2251	0.000653112
Q9CQ62	260	K	2,4-dienoyl-CoA reductase, mitochondrial	Decr1	79.659	_FEK(ac)EMIDR_	-2.6772	2	555.268	1.0274	1.05308	1.07877	0.842466	0.863014	0.873288	1.2251	0.000976675
Q62261	497	K	Spectrin beta chain, non-erythrocytic 1	Sptbn1	128.22	_ELEAENYHDIK(ac)R_	-0.37321	2	779.878	1.14723	1.13002	1.11281	0.940727	0.952199	0.871893	1.22614	0.00721762
Q64521	634	K	Glycerol-3-phosphate dehydrogenase, mitochondrial	Gpd2	139.44	_FHK(ac)FDEDEK_	-0.078875	3	412.856	1.1194	1.10261	1.08582	0.895522	0.906716	0.895522	1.22614	0.000708656
Q9Z2I9	438	K	Succinyl-CoA ligase [ADP-forming] subunit beta, mitochondrial	Sucla2	119.96	_ILACDDLDEAAK(ac)MVVK_	-2.6145	4	458.984	1.11732	1.08939	1.06145	0.882682	0.916201	0.860335	1.22899	0.000892394
B2RSH2	271	K	Guanine nucleotide-binding protein G(i) subunit alpha-1	Gnai1	90.15	_K(ac)DLFEEK_	-2.1642	2	475.745	1.16505	1.11845	1.07184	0.96699	0.932039	0.827184	1.23077	0.0190663
P16546	756	K	Spectrin alpha chain, non-erythrocytic 1	Sptan1	113.47	_QFQDAGHFDAENIK(ac)K_	-1.3591	3	597.288	1.04712	1.10995	1.17277	0.86911	0.931937	0.900524	1.23256	0.0147886
P63328	40	K	Serine/threonine-protein phosphatase 2B catalytic subunit alpha isoform	Ppp3ca	66.538	_EVFDNDGK(ac)PR_	1.0838	2	609.791	1.14723	1.14149	1.13576	0.894837	0.940727	0.940727	1.23347	0.0036138
Q9D855	88	K	Cytochrome b-c1 complex subunit 7	Uqcrb	134.88	_YEEDK(ac)FYLEPYLK_	0.47386	2	889.93	1.07914	1.11151	1.14388	0.960432	0.863309	0.874101	1.236	0.00739012
Q05920	316	K	Pyruvate carboxylase, mitochondrial	Pc	187.47	_QVGYENAGTVEFLVDK(ac)HGK_	-4.3816	3	711.692	1.02389	1.08532	1.14676	0.901024	0.849829	0.880546	1.23735	0.0164097
Q61316	235	K	Heat shock 70 kDa protein 4	Hspa4	124.62	_K(ac)FDEVLVNHFCEEFGK_	0.29002	3	680.656	1.05263	1.14211	1.23158	0.936842	0.852632	0.978947	1.23764	0.0304495
Q9CPP6	46	K	NADH dehydrogenase [ubiquinone] 1 alpha subcomplex subunit 5	Ndufa5	138.2	_K(ac)YTEQITNEK_	-0.10229	2	648.328	1.10092	1.11743	1.13394	0.902752	0.913761	0.891743	1.2378	0.000127041
P26443	191	K	Glutamate dehydrogenase 1, mitochondrial	Glud1	212.24	_INPK(ac)NYTDNELEK_	-0.20035	2	810.399	1.11317	1.12987	1.14657	0.957328	0.90167	0.879406	1.2378	0.00500368
P84244	80	K	Histone H3.3	H3f3a	192.15	_EIAQDFK(ac)TDLR_	1.4968	2	689.354	1.07335	1.08945	1.10555	0.890877	0.847943	0.90161	1.2378	0.00122029
P54071	275	K	Isocitrate dehydrogenase [NADP], mitochondrial	Idh2	96.342	_HYK(ac)TDFDK_	-0.97424	2	548.259	1.05448	1.12302	1.19156	0.917399	0.87522	0.927944	1.23837	0.020061
Q9CQQ7	154	K	ATP synthase F(0) complex subunit B1, mitochondrial	Atp5f1	142.39	_QIQDAIDMEK(ac)AQQALVQK_	-1.654	4	525.525	1.08499	1.07957	1.07414	0.867993	0.878843	0.867993	1.23859	2.07831e-06
P54071	280	K	Isocitrate dehydrogenase [NADP], mitochondrial	Idh2	76.064	_TDFDK(ac)NK_	-0.89279	2	455.219	1.10294	1.10294	1.10294	0.849265	0.9375	0.882353	1.23967	0.0142553
P62204	78	K	Calmodulin	Calm1	78.814	_MK(ac)DTDSEEEIR_	-0.023146	2	697.809	1.11524	1.14312	1.171	0.836431	0.947955	0.97026	1.24494	0.0209874
P05202	404	K	Aspartate aminotransferase, mitochondrial	Got2	134.56	_EFSVYM(ox)TK(ac)DGR_	0.66684	2	695.819	1.08108	1.1027	1.12432	0.886486	0.886486	0.875676	1.24898	0.00171664
P05202	90	K	Aspartate aminotransferase, mitochondrial	Got2	160.78	_KAEAQIAAK(ac)NLDK_	0.083792	2	721.404	1.10701	1.11808	1.12915	0.896679	0.885609	0.896679	1.25207	4.70424e-05
P61922	279	K	4-aminobutyrate aminotransferase, mitochondrial	Abat	212.1	_CLEEVEDLIVK(ac)YR_	-0.99069	3	569.959	1.08499	1.12297	1.16094	0.911392	0.889693	0.878843	1.25709	0.00348078
Q9DB20	192	K	ATP synthase subunit O, mitochondrial	Atp5o	105.03	_IGEK(ac)YVDMSAK_	0.079044	3	428.216	1.17647	1.16471	1.15294	0.929412	0.941176	0.905882	1.25847	0.000123352
G5E829	737	K	Plasma membrane calcium-transporting ATPase 1	Atp2b1	81.016	_CGILHPGEDFLCLEGK(ac)DFNR_	-2.0025	3	807.044	1.01351	1.05912	1.10473	0.861486	0.841216	0.820946	1.25904	0.00636387
Q8BKZ9	325	K	Pyruvate dehydrogenase protein X component, mitochondrial	Pdhx	157.22	_DLVKDDIK(ac)VSVNDFIIR_	2.767	3	677.709	1.11732	1.13966	1.16201	0.837989	0.927374	0.949721	1.25926	0.0121272
P01942	17	K	Hemoglobin subunit alpha	Hba	148.52	_AAWGK(ac)IGGHGAEYGAEALER_	4.2504	3	695.676	1.07527	1.09677	1.11828	0.903226	0.870968	0.83871	1.25926	0.00106172
P58252	857	K	Elongation factor 2	Eef2	58.32	_EGIPALDNFLDK(ac)L_	-4.1112	2	743.893	1.11524	1.10967	1.10409	0.858736	0.869888	0.914498	1.25949	0.00433955
Q60597	970	K	2-oxoglutarate dehydrogenase, mitochondrial	Ogdh	145.31	_NQGYYDYVK(ac)PR_	1.6411	3	482.233	0.995025	1.0995	1.20398	0.915423	0.935323	0.766169	1.26046	0.04861
P48036	68	K	Annexin A5	Anxa5	129.38	_DLVDDLK(ac)SELTGK_	1.3519	3	492.259	1.16732	1.12646	1.0856	0.910506	0.933852	0.828794	1.26419	0.00519638
Q922H2	134	K	[Pyruvate dehydrogenase (acetyl-transferring)] kinase isozyme 3, mitochondrial	Pdk3	115.63	_HNDVVPTMAQGVIEYK(ac)EK_	0.97082	3	700.686	0.991736	1.09587	1.2	0.912397	0.803306	0.882645	1.26527	0.0420333
P62259	28	K	14-3-3 protein epsilon	Ywhae	110.08	_YDEMVESMK(ac)K_	-1.4617	2	651.291	1.04895	1.07517	1.1014	0.923077	0.839161	0.786713	1.26543	0.0191318
Q9D172	201	K	ES1 protein homolog, mitochondrial	D10Jhu81e	187.16	_GVEVTVGHEQEEGGK(ac)WPYAGTAEAIK_	-2.3132	4	696.842	1.10497	1.13812	1.17127	0.939227	0.861878	0.895028	1.26639	0.00138202
Q8CAK1	222	K	Putative transferase CAF17 homolog, mitochondrial	Iba57	150.34	_GQLGDLQDYHK(ac)YR_	0.44202	2	817.9	1.06762	1.17438	1.28114	0.854093	0.928826	0.992883	1.26923	0.0348714
P61922	252	K	4-aminobutyrate aminotransferase, mitochondrial	Abat	151.87	_LK(ac)YPLEEFTTDNQQEEAR_	-0.57769	2	1127.04	1.08303	1.13177	1.18051	0.833935	0.898917	0.942238	1.26923	0.00490113
P17182	262	K	Alpha-enolase	Eno1	124.62	_YDLDFK(ac)SPDDPSR_	0.59079	2	798.862	1.11524	1.07621	1.03717	0.881041	0.791822	0.869888	1.26974	0.00366925
Q8R0A5	11	K	Transcription elongation factor A protein-like 3	Tceal3	77.062	_GENEGK(ac)LEK_	-0.66501	2	523.262	1.11317	1.10761	1.10204	0.857143	0.923933	0.834879	1.27021	0.0117491
Q8CCK0	246	K	Core histone macro-H2A.2	H2afy2	126.71	_EFLETVK(ac)ELR_	3.0339	2	653.356	1.10497	1.10497	1.10497	0.839779	0.872928	0.895028	1.27119	0.00460664
Q8BMF4	461	K	Dihydrolipoyllysine-residue acetyltransferase component of pyruvate dehydrogenase complex, mitochondrial	Dlat	93.839	_ELNK(ac)MLEGK_	-0.26571	2	552.292	1.15385	1.125	1.09615	0.876923	0.9	0.876923	1.27174	0.00131152
Q9DCX2	144	K	ATP synthase subunit d, mitochondrial	Atp5h	128.98	_NIIPFDQMTIDDLNEIFPETK(ac)LDK_	1.2188	3	964.484	1.08696	1.125	1.16304	0.826087	0.945652	0.880435	1.27254	0.00690433
Q8CHH9	360	K	Septin-8	Sept8	111.12	_VKETELELK(ac)EK_	0.94014	3	463.261	1.11317	1.12987	1.14657	0.868275	0.879406	0.912801	1.27406	0.000224965
Q8R0F8	116	K	Acylpyruvase FAHD1, mitochondrial	Fahd1	127.76	_DVQEECK(ac)K_	-0.57476	2	539.248	1.17417	1.14481	1.11546	0.868885	0.915851	0.90411	1.27729	0.000420679
Q9CQQ7	221	K	ATP synthase F(0) complex subunit B1, mitochondrial	Atp5f1	156.17	_RKEEEHMIDWVEK(ac)HVVK_	-2.5754	5	447.634	1.14723	1.13576	1.12428	0.883365	0.883365	0.894837	1.28017	3.84107e-05
O88935	311	K	Synapsin-1	Syn1	214.54	_TYATAEPFIDAK(ac)YDVR_	2.4126	3	634.648	1.08303	1.13718	1.19134	0.909747	0.855596	0.898917	1.28049	0.00564188
P54071	106	K	Isocitrate dehydrogenase [NADP], mitochondrial	Idh2	199.89	_DQTNDQVTIDSALATQK(ac)YSVAVK_	-0.46644	4	635.074	1.15607	1.15029	1.14451	0.947977	0.867052	0.878613	1.28112	0.00895546
P42669	272	K	Transcriptional activator protein Pur-alpha	Pura	82.202	_FGHTFCK(ac)YSEEMK_	-0.58153	3	569.25	1.222	1.14868	1.07536	0.940937	0.879837	0.867617	1.28182	0.0127358
Q8CI94	290	K	Glycogen phosphorylase, brain form	Pygb	112.96	_VLYPNDNFFEGK(ac)ELR_	2.486	3	628.316	1.0582	1.12698	1.19577	0.952381	0.814815	0.867725	1.28313	0.011617
Q9Z1G4	103	K	V-type proton ATPase 116 kDa subunit a isoform 1	Atp6v0a1	165.45	_DMIDLEANFEK(ac)IENELK_	1.978	3	698.342	1.08303	1.13177	1.18051	0.833935	0.855596	0.953069	1.28484	0.00669757
O08749	410	K	Dihydrolipoyl dehydrogenase, mitochondrial	Dld	190.34	_SEEQLK(ac)EEGIEFK_	0.54798	2	804.394	1.0989	1.14835	1.1978	0.901099	0.868132	0.912088	1.28484	0.00493592
Q9DB73	46	K	NADH-cytochrome b5 reductase 1	Cyb5r1	149.97	_RPQVTLQDPDEK(ac)YLLR_	-1.5574	3	671.697	1.02041	1.09694	1.17347	0.857143	0.94898	0.755102	1.28486	0.0293537
Q91ZA3	196	K	Propionyl-CoA carboxylase alpha chain, mitochondrial	Pcca	130.05	_VNTIPGFDGVVK(ac)DADEAVR_	2.8353	3	682.016	1.05263	1.06316	1.07368	0.778947	0.810526	0.884211	1.28936	0.0140377
Q99MR8	233	K	Methylcrotonoyl-CoA carboxylase subunit alpha, mitochondrial	Mccc1	147.12	_K(ac)SFNDDAMLIEK_	-0.087714	2	726.856	1.10906	1.15896	1.20887	0.853974	0.876155	0.96488	1.29012	0.0045821
Q9CQQ7	238	K	ATP synthase F(0) complex subunit B1, mitochondrial	Atp5f1	133.16	_ETIAK(ac)CIEDLK_	-1.7905	2	681.353	1.16279	1.14535	1.12791	0.906977	0.837209	0.895349	1.30176	0.00200437
P54071	263	K	Isocitrate dehydrogenase [NADP], mitochondrial	Idh2	52.576	_FK(ac)DIFQEIFDK_	-0.28637	3	491.254	1.19522	1.11753	1.03984	0.836653	0.944223	0.788845	1.30465	0.0153149
Q2PFD7	821	K	PH and SEC7 domain-containing protein 3	Psd3	74.464	_DEYK(ac)PEK_	-0.096522	2	475.727	1.03986	1.15425	1.26863	0.873484	0.998267	0.779896	1.30588	0.0417923
Q9CZU6	321	K	Citrate synthase, mitochondrial	Cs	111.64	_EVGK(ac)DVSDEK(ac)LR_	-0.044193	2	729.875	1.0989	1.10989	1.12088	0.846154	0.813187	0.89011	1.30603	0.00449136
Q8C854	140	K	Myelin expression factor 2	Myef2	88.092	_GCGVVEFK(ac)DEEFVK_	-1.9034	3	562.268	1.0582	1.1164	1.1746	0.888889	0.814815	0.857143	1.30785	0.00477468
P16330	274	K	2',3'-cyclic-nucleotide 3'-phosphodiesterase	Cnp	165.45	_AAGAEEYAQQEVVK(ac)R_	0.49393	3	564.285	1.12782	1.16165	1.19549	0.879699	0.913534	0.868421	1.30932	0.000598383
Q9DBF1	94	K	Alpha-aminoadipic semialdehyde dehydrogenase	Aldh7a1	134.13	_DYEETIGK(ac)AK_	3.5382	2	598.296	1.15163	1.16315	1.17466	0.829175	0.898273	0.932821	1.31169	0.00935853
Q9CZU6	193	K	Citrate synthase, mitochondrial	Cs	105.9	_AK(ac)YWELIYEDCMDLIAK_	-0.28942	3	735.02	1.07143	1.11964	1.16786	0.867857	0.825	0.867857	1.31172	0.00348
Q9Z2I9	215	K	Succinyl-CoA ligase [ADP-forming] subunit beta, mitochondrial	Sucla2	127.17	_EPIDIVEGIK(ac)K_	-1.2029	2	641.866	1.12782	1.1109	1.09398	0.778195	0.857143	0.902256	1.31333	0.0134209
Q8R1I1	59	K	Cytochrome b-c1 complex subunit 9	Uqcr10	91.069	_HK(ac)YENKE_	1.1123	3	330.494	1.06762	1.16904	1.27046	0.896797	0.811388	0.960854	1.314	0.0215682
Q04750	152	K	DNA topoisomerase 1	Top1	69.92	_LRDEDDADYKPK(ac)K_	-0.41643	4	409.456	1.14504	1.18511	1.22519	0.996183	0.790076	0.916031	1.31568	0.0291635
P14824	418	K	Annexin A6	Anxa6	97.904	_DLMADLK(ac)SEISGDLAR_	0.10453	3	592.633	1.17647	1.16471	1.15294	0.929412	0.764706	0.941176	1.32589	0.0357797
Q9DB20	158	K	ATP synthase subunit O, mitochondrial	Atp5o	139.51	_GEVPCTVTTASPLDDAVLSELK(ac)TVLK_	-0.77632	5	557.897	1.1236	1.14045	1.1573	0.831461	0.842697	0.898876	1.32969	0.00152846
O55131	372	K	Septin-7	Sept7	104.24	_LK(ac)DSEAELQR_	-0.5805	2	615.82	1.0929	1.18033	1.26776	0.830601	0.808743	1.01639	1.33333	0.0264005
P20108	92	K	Thioredoxin-dependent peroxide reductase, mitochondrial	Prdx3	143.97	_ELSLDDFK(ac)GK_	-2.9835	3	398.54	1.19522	1.17131	1.14741	0.848606	0.920319	0.860558	1.33636	0.000886806
Q9D855	96	K	Cytochrome b-c1 complex subunit 7	Uqcrb	85.737	_YEEDKFYLEPYLK(ac)EVIR_	0.18165	3	759.388	1.0989	1.14835	1.1978	0.945055	0.824176	0.802198	1.33974	0.00829219
Q3UHB1	249	K	5'-nucleotidase domain-containing protein 3	Nt5dc3	71.451	_DVK(ac)DSIR_	0.50225	2	437.735	1.08303	1.13177	1.18051	0.833935	0.866426	0.823105	1.34549	0.00330104
P07724	376	K	Serum albumin	Alb	72.928	_K(ac)YEATLEK_	0.56257	3	341.85	1.00334	1.1388	1.27425	0.93311	0.802676	0.802676	1.34585	0.0440159
Q9CQC7	55	K	NADH dehydrogenase [ubiquinone] 1 beta subcomplex subunit 4	Ndufb4	117.27	_EYLLQYNDPK(ac)R_	-2.5729	3	494.253	1.09489	1.11679	1.13869	0.886861	0.810219	0.788321	1.34802	0.00452219
B2RSH2	277	K	Guanine nucleotide-binding protein G(i) subunit alpha-1	Gnai1	98.048	_DLFEEK(ac)IK_	1.0449	3	355.194	1.16505	1.19417	1.2233	0.885437	0.862136	0.908738	1.34868	0.000184924
Q8QZT1	248	K	Acetyl-CoA acetyltransferase, mitochondrial	Acat1	116.06	_GKPDVVVK(ac)EDEEYKR_	1.7014	3	611.651	1.12782	1.18421	1.2406	0.902256	0.868421	0.857143	1.35193	0.00486119
Q91XV3	18	K	Brain acid soluble protein 1	Basp1	110.08	_GYNVNDEK(ac)AK_	-0.58373	2	590.286	1.21704	1.16836	1.11968	0.827586	0.888438	0.876268	1.35211	0.00157478
P54071	45	K	Isocitrate dehydrogenase [NADP], mitochondrial	Idh2	130.05	_IK(ac)VEKPVVEMDGDEMTR_	1.8991	3	673.336	1.13636	1.15909	1.18182	0.909091	0.784091	0.863636	1.36	0.00780379
Q6P8J2	29	K	Diamine acetyltransferase 2	Sat2	175.66	_ELAEFEK(ac)LSHQVK_	3.5214	3	533.951	1.20968	1.18548	1.16129	0.870968	0.834677	0.907258	1.36111	0.000512835
Q8CIE6	46	K	Coatomer subunit alpha	Copa	115.56	_MCTLIDK(ac)FDEHDGPVR_	1.6663	3	658.973	0.943396	1.05189	1.16038	0.707547	0.754717	0.849057	1.36531	0.0257482
P56382	28	K	ATP synthase subunit epsilon, mitochondrial	Atp5e	104.22	_DALK(ac)TEFK_	-1.0122	3	331.847	1.2	1.176	1.152	0.876	0.864	0.84	1.36744	8.78737e-05
P14824	75	K	Annexin A6	Anxa6	121.99	_DLIEDLK(ac)YELTGK_	-3.2489	2	789.917	1.13422	1.16257	1.19093	0.918715	0.805293	0.816635	1.37277	0.0053269
P11499	551	K	Heat shock protein HSP 90-beta	Hsp90ab1	142.45	_EGLELPEDEEEKK(ac)K_	-1.7489	3	572.284	1.11317	1.23006	1.34694	0.812616	0.846011	1.02412	1.37552	0.0234707
Q91WS0	68	K	CDGSH iron-sulfur domain-containing protein 1	Cisd1	168.41	_VVHAFDMEDLGDK(ac)AVYCR_	-0.81787	3	723.003	1.06952	1.12299	1.17647	0.84492	0.791444	0.812834	1.37555	0.00321611
Q3UHB1	246	K	5'-nucleotidase domain-containing protein 3	Nt5dc3	111.22	_NNIDYEPVHLYK(ac)DVK_	-1.6994	3	630.319	1.13852	1.16698	1.19545	0.933586	0.796964	0.808349	1.37892	0.0104356
P16460	228	K	Argininosuccinate synthase	Ass1	91.812	_APNSPDVLEIEFK(ac)K_	-1.9036	3	543.623	1.11111	1.14444	1.17778	0.744444	0.8	0.944444	1.37946	0.0250812
Q03265	240	K	ATP synthase subunit alpha, mitochondrial	Atp5a1	98.942	_FNDGTDEK(ac)K(ac)K_	0.18776	2	633.304	1.16959	1.15789	1.1462	0.77193	0.900585	0.842105	1.3814	0.0112619
P43006	382	K	Excitatory amino acid transporter 2	Slc1a2	141.13	_CLEDNLGIDK(ac)R_	-1.2005	2	687.838	1.16505	1.20583	1.2466	0.932039	0.827184	0.838835	1.39238	0.00174272
P62806	78	K	Histone H4	Hist1h4a	138.76	_DAVTYTEHAK(ac)R_	2.4285	3	444.89	1.2024	1.2024	1.2024	0.829659	0.961924	0.793587	1.39535	0.0218247
P63001	153	K	Ras-related C3 botulinum toxin substrate 1	Rac1	119.47	_EIGAVK(ac)YLECSALTQR_	0.1862	3	627.324	1.14504	1.14504	1.14504	0.858779	0.870229	0.732824	1.39535	0.0179151
Q62420	34	K	Endophilin-A1	Sh3gl2	79.283	_LDDDFK(ac)EMER_	-0.8035	2	670.295	1.10497	1.1768	1.24862	0.828729	0.839779	0.839779	1.40749	0.0139434
Q9DCX2	85	K	ATP synthase subunit d, mitochondrial	Atp5h	193.54	_IPVPEDK(ac)YTALVDQEEKEDVK_	1.2332	4	622.568	1.16732	1.21401	1.2607	0.875486	0.828794	0.875486	1.41176	0.00107501
Q03265	305	K	ATP synthase subunit alpha, mitochondrial	Atp5a1	64.454	_DNGK(ac)HALIIYDDLSK_	-1.4105	3	581.969	1.16959	1.23392	1.29825	0.923977	0.900585	0.783626	1.41928	0.00335487
P05202	296	K	Aspartate aminotransferase, mitochondrial	Got2	188.47	_VGAFTVVCK(ac)DAEEAK_	-2.9346	3	555.943	1.19048	1.17857	1.16667	0.833333	0.845238	0.809524	1.42105	3.50967e-05
P63038	249	K	60 kDa heat shock protein, mitochondrial	Hspd1	115.91	_CEFQDAYVLLSEK(ac)K_	2.181	3	591.291	1.18812	1.20594	1.22376	0.867327	0.831683	0.843564	1.4229	1.677e-05
P38647	625	K	Stress-70 protein, mitochondrial	Hspa9	119.92	_ALLAGK(ac)DSETGENIR_	2.9022	2	808.418	1.12782	1.17293	1.21805	0.800752	0.766917	0.902256	1.42466	0.00350847
P55012	1136	K	Solute carrier family 12 member 2	Slc12a2	97.69	_ITDNELELYK(ac)TK_	-3.7543	3	503.6	1.07335	1.15921	1.24508	0.783542	0.805009	0.847943	1.42731	0.0114911
P05202	107	K	Aspartate aminotransferase, mitochondrial	Got2	110.03	_EYLPIGGLAEFCK(ac)ASAELALGENNEVLK_	1.7335	4	770.143	1.10294	1.19118	1.27941	0.838235	0.805147	0.849265	1.43363	0.0147085
P16546	190	K	Spectrin alpha chain, non-erythrocytic 1	Sptan1	104.2	_K(ac)FEEFQTDLAAHEER_	0.045963	3	631.299	1.11317	1.11317	1.11317	0.734694	0.846011	0.745826	1.43541	0.0108111
P58252	445	K	Elongation factor 2	Eef2	99.283	_EDLYLK(ac)PIQR_	-0.58928	2	658.864	1.08499	1.19892	1.31284	0.889693	0.824593	0.781193	1.4413	0.0167619
Q7TQF7	101	K	Amphiphysin	Amph	146.2	_MVGEK(ac)CDVLWEDFHQK_	-0.69914	3	688.317	1.2024	1.16633	1.13026	0.841683	0.769539	0.805611	1.44776	0.000255217
Q8BWF0	128	K	Succinate-semialdehyde dehydrogenase, mitochondrial	Aldh5a1	138.28	_DDLAK(ac)IITAESGKPLK_	-1.4778	4	435.999	1.21951	1.20122	1.18293	0.817073	0.829268	0.804878	1.47015	2.40969e-05
P35486	63	K	Pyruvate dehydrogenase E1 component subunit alpha, somatic form, mitochondrial	Pdha1	71.614	_EDGLK(ac)YYR_	0.66136	2	543.267	1.222	1.20978	1.19756	0.867617	0.782077	0.818737	1.4703	0.00230044
Q922B1	293	K	O-acetyl-ADP-ribose deacetylase MACROD1	Macrod1	115.29	_EWLEQHK(ac)DK_	0.61908	2	627.809	1.13208	1.19434	1.2566	0.871698	0.735849	0.826415	1.47209	0.00213404
Q9WV92	299	K	Band 4.1-like protein 3	Epb41l3	137.61	_GMTPAEAEMHFLENAK(ac)K_	-0.48458	4	487.234	1.17647	1.19412	1.21176	0.764706	0.811765	0.847059	1.47816	0.00112616
P12658	109	K	Calbindin	Calb1	94.281	_K(ac)YDTDHSGFIETEELK_	-1.475	3	651.974	1.1257	1.21013	1.29456	0.709193	0.79925	0.934334	1.48618	0.0101338
P17751	238	K	Triosephosphate isomerase	Tpi1	157.91	_TATPQQAQEVHEK(ac)LR_	0.22573	3	593.311	1.06195	1.22124	1.38053	0.838938	0.785841	0.828319	1.49351	0.0444944
Q61941	70	K	NAD(P) transhydrogenase, mitochondrial	Nnt	107.79	_EIFQNEK(ac)R_	-0.90154	2	553.285	1.21457	1.20243	1.19028	0.850202	0.813765	0.740891	1.5	0.00470958
Q9CYH2	126	K	Redox-regulatory protein FAM213A	Fam213a	112.13	_GEIFLDEK(ac)K_	1.8615	2	560.798	1.14943	1.18966	1.22989	0.758621	0.827586	0.793103	1.5	0.000234486
O35633	113	K	Vesicular inhibitory amino acid transporter	Slc32a1	77.969	_DQAVGAGGEFGGHDK(ac)PK_	-1.4798	3	571.273	1.1194	1.21455	1.3097	0.738806	0.817164	0.839552	1.52103	0.00615458
Q8CHH9	369	K	Septin-8	Sept8	113.22	_ELHEK(ac)FEHLK_	1.5121	4	338.681	1.2931	1.27371	1.25431	0.814655	0.853448	0.814655	1.53906	1.53024e-05
P26443	68	K	Glutamate dehydrogenase 1, mitochondrial	Glud1	140.22	_EDDPNFFK(ac)MVEGFFDR_	0.088883	3	678.968	1.14504	1.19656	1.24809	0.767176	0.721374	0.835878	1.54433	0.000742184
P16330	177	K	2',3'-cyclic-nucleotide 3'-phosphodiesterase	Cnp	73.248	_LK(ac)PGLEK_	-1.4985	3	276.173	1.42518	1.28979	1.15439	0.741093	0.940618	0.783848	1.56936	0.0105328
P62761	162	K	Visinin-like protein 1	Vsnl1	83.204	_NK(ac)DDQITLDEFK_	2.633	3	503.247	1.10294	1.2739	1.44485	0.705882	0.849265	0.860294	1.58219	0.0247507
P14152	214	K	Malate dehydrogenase, cytoplasmic	Mdh1	125.97	_EVGVYEALK(ac)DDSWLK_	1.3736	3	598.637	1.10906	1.31423	1.51941	0.754159	0.77634	0.887246	1.63073	0.0385321
P05202	185	K	Aspartate aminotransferase, mitochondrial	Got2	148.38	_YYDPK(ac)TCGFDFSGALEDISK_	0.49615	3	785.688	1.22951	1.30328	1.37705	0.860656	0.737705	0.79918	1.63077	0.000940708
P14211	238	K	Calreticulin	Calr	83.992	_IDDPTDSKPEDWDK(ac)PEHIPDPDAK_	0.48064	4	701.324	1.10906	1.35305	1.59704	0.709797	0.743068	0.898336	1.72642	0.0409296
P05202	82	K	Aspartate aminotransferase, mitochondrial	Got2	101.2	_K(ac)AEAQIAAK(ac)NLDK_	1.6777	3	495.275	1.2959	1.28942	1.28294	0.777538	0.725702	0.609071	1.83129	0.00691695
