# Supplementary material for: Proteomic Profiling of Lysine Acetylation Indicates Mitochondrial Dysfunction in the Hippocampus of Gut Microbiota-Absent Mice
Source: Front Mol Neurosci. 2021 Mar 11;14:594332. doi: 10.3389/fnmol.2021.594332 (PMC7991600; doi:10.3389/fnmol.2021.594332)
Supplement: Supplementary Figure 1 — GO functional classification of the identified acetylated proteins. [file Data_Sheet_1.ZIP › Supplementary Material/Supplementary Table S2.xlsx]

## Sheet: Sheet1
Table S2.motif-x analysis of the identified and quantified proteins in mouse.
		Motif Logo	Motif	Motif Score	Foreground		Background		Fold Increase
					Matches	Size	Matches	Size
			........D.K..........	16	126	935	1203	21167	2.37
			.........EK..........	11.26	138	809	1867	19964	1.82
			.........DK..........	12.05	89	671	1058	18097	2.27
			..........KK.........	12.84	106	582	1458	17039	2.13
			..........KY.........	8.62	39	476	427	15581	2.99
			..........KD.........	9.38	69	437	1072	15154	2.23
			.......D..K..........	8.94	57	368	912	14082	2.39
			.......E..KR.........	14.42	22	311	118	13170	7.9
