# Supplementary material for: Proteomic Profiling of Lysine Acetylation Indicates Mitochondrial Dysfunction in the Hippocampus of Gut Microbiota-Absent Mice
Source: Front Mol Neurosci. 2021 Mar 11;14:594332. doi: 10.3389/fnmol.2021.594332 (PMC7991600; doi:10.3389/fnmol.2021.594332)
Supplement: Supplementary Figure 1 — GO functional classification of the identified acetylated proteins. [file Data_Sheet_1.ZIP › Supplementary Material/Supplementary Table S3.xlsx]

## Sheet: Biological Processes
Table S3. Gene Ontology (GO) classification of acetylated proteins according to biological processes
maxLevel	levels	GO_Name	GO_ID	Pvalue	Pvalue_adjusted	PAS_Value	PAS_Zscore	max_zscore	min_zscore	Genes	Count	Pop_Hit	List_Total	Background_Genes	URL	PATHS
4	4	small molecule metabolic process	GO:0044281	1.97e-19	5.8e-16	0	0	0	0	Dbi|1;Taldo1|1;Atp5j|1;Mcee|1;Afp|1;Psat1|1;Cltc|1;Etfdh|1;Idh2|1;Atp5d|1;Aco2|1;Ptges3|1;Lypla1|1;Aldh5a1|1;Ldha|1;Atp5h|1;Ndufc2|1;Aldh1l1|1;Sdha|1;Decr2|1;Gpd2|1;Sucla2|1;Uqcrb|1;Glud1|1;Atp5f1|1;Got2|1;Abat|1;Atp5o|1;Pdhx|1;Ogdhl|1;Pdk1|1;Eno1|1;Dlat|1;Atp6v0a1|1;Dld|1;Cyb5r1|1;Mccc1|1;Cs|1;Cnp|1;Aldh7a1|1;Uqcr10|1;Acat1|1;Atp5e|1;Ass1|1;Atp5a1|1;Pdha1|1;Macrod1|1;Tpi1|1;Fam213b|1;Mdh1|1	50	5115	126	53607	http://www.ebi.ac.uk/QuickGO/GTerm?id=GO:0044281	[]
7	7	tricarboxylic acid metabolic process	GO:0072350	1.43e-16	2.1e-13	0	0	0	0	Idh2|1;Aco2|1;Sdha|1;Sucla2|1;Glud1|1;Ogdhl|1;Dlat|1;Cs|1;Ass1|1;Pdha1|1;Mdh1|1	11	85	126	53607	http://www.ebi.ac.uk/QuickGO/GTerm?id=GO:0072350	[]
5	4,5	energy derivation by oxidation of organic compounds	GO:0015980	8.88e-16	8.71e-13	0	0	0	0	Etfdh|1;Idh2|1;Aco2|1;Ptges3|1;Aldh5a1|1;Ldha|1;Ndufc2|1;Sdha|1;Sucla2|1;Uqcrb|1;Ndufa5|1;Ogdhl|1;Dlat|1;Pygb|1;Dld|1;Cs|1;Uqcr10|1;Cisd1|1;Pdha1|1;Mdh1|1	20	733	126	53607	http://www.ebi.ac.uk/QuickGO/GTerm?id=GO:0015980	[]
4	4	generation of precursor metabolites and energy	GO:0006091	2.28e-15	1.43e-12	0	0	0	0	Etfdh|1;Idh2|1;Aco2|1;Ptges3|1;Aldh5a1|1;Ldha|1;Ndufc2|1;Sdha|1;Sucla2|1;Uqcrb|1;Ndufa5|1;Ogdhl|1;Eno1|1;Dlat|1;Pygb|1;Dld|1;Cs|1;Uqcr10|1;Cisd1|1;Pdha1|1;Tpi1|1;Mdh1|1	22	998	126	53607	http://www.ebi.ac.uk/QuickGO/GTerm?id=GO:0006091	[]
6	6	carboxylic acid metabolic process	GO:0019752	2.43e-15	1.43e-12	0	0	0	0	Dbi|1;Psat1|1;Cltc|1;Etfdh|1;Idh2|1;Aco2|1;Ptges3|1;Lypla1|1;Aldh5a1|1;Ldha|1;Aldh1l1|1;Sdha|1;Decr2|1;Sucla2|1;Glud1|1;Got2|1;Abat|1;Pdhx|1;Ogdhl|1;Pdk1|1;Eno1|1;Dlat|1;Dld|1;Mccc1|1;Cs|1;Acat1|1;Ass1|1;Pdha1|1;Tpi1|1;Fam213b|1;Mdh1|1	31	2328	126	53607	http://www.ebi.ac.uk/QuickGO/GTerm?id=GO:0019752	[]
6	5,6	cellular respiration	GO:0045333	4.38e-15	2.15e-12	0	0	0	0	Etfdh|1;Idh2|1;Aco2|1;Aldh5a1|1;Ndufc2|1;Sdha|1;Sucla2|1;Uqcrb|1;Ndufa5|1;Ogdhl|1;Dlat|1;Dld|1;Cs|1;Uqcr10|1;Cisd1|1;Pdha1|1;Mdh1|1	17	501	126	53607	http://www.ebi.ac.uk/QuickGO/GTerm?id=GO:0045333	[]
4	4	cofactor metabolic process	GO:0051186	8.24e-15	3.46e-12	0	0	0	0	Spta1|1;Taldo1|1;Mcee|1;Idh2|1;Ldha|1;Acot9|1;Aldh1l1|1;Gpd2|1;Sucla2|1;Pdhx|1;Pdk1|1;Iba57|1;Eno1|1;Dlat|1;Dld|1;Cs|1;Acat1|1;Hspa9|1;Pdha1|1;Tpi1|1;Mdh1|1	21	941	126	53607	http://www.ebi.ac.uk/QuickGO/GTerm?id=GO:0051186	[]
4	4	single-organism biosynthetic process	GO:0044711	1.18e-14	4.03e-12	0	0	0	0	Ep300|1;Dbi|1;Atp5j|1;Tfam|1;Psat1|1;Cltc|1;Idh2|1;Atp5d|1;Ptges3|1;Lrpprc|1;Ldha|1;Atp5h|1;Ndufc2|1;Decr2|1;Gpd2|1;Glud1|1;Atp5f1|1;Got2|1;Abat|1;Atp5o|1;Pdhx|1;Pdk1|1;Sptlc3|1;Iba57|1;Dlat|1;Atp6v0a1|1;Dld|1;Cyb5r1|1;Aldh7a1|1;Acat1|1;Atp5e|1;Ass1|1;Atp5a1|1;Pdha1|1;Tpi1|1;Fam213b|1	36	3424	126	53607	http://www.ebi.ac.uk/QuickGO/GTerm?id=GO:0044711	[]
4	4	oxidation-reduction process	GO:0055114	1.23e-14	4.03e-12	0	0	0	0	Dbi|1;Etfdh|1;Idh2|1;Aco2|1;Ptges3|1;Aldh5a1|1;Ldha|1;Ndufc2|1;Aldh1l1|1;Sdha|1;Prdx3|1;Decr2|1;Gpd2|1;Sucla2|1;Uqcrb|1;Ndufa5|1;Glud1|1;Ogdhl|1;Dlat|1;Pygb|1;Dld|1;Cyb5r1|1;Cs|1;Aldh7a1|1;Uqcr10|1;Ndufb4|1;Acat1|1;Cisd1|1;Pdha1|1;Fam213b|1;Mdh1|1	31	2473	126	53607	http://www.ebi.ac.uk/QuickGO/GTerm?id=GO:0055114	[]
5	5	oxoacid metabolic process	GO:0043436	1.63e-14	4.8e-12	0	0	0	0	Dbi|1;Psat1|1;Cltc|1;Etfdh|1;Idh2|1;Aco2|1;Ptges3|1;Lypla1|1;Aldh5a1|1;Ldha|1;Aldh1l1|1;Sdha|1;Decr2|1;Sucla2|1;Glud1|1;Got2|1;Abat|1;Pdhx|1;Ogdhl|1;Pdk1|1;Eno1|1;Dlat|1;Dld|1;Mccc1|1;Cs|1;Acat1|1;Ass1|1;Pdha1|1;Tpi1|1;Fam213b|1;Mdh1|1	31	2499	126	53607	http://www.ebi.ac.uk/QuickGO/GTerm?id=GO:0043436	[]
4	4	tricarboxylic acid cycle	GO:0006099	2.56e-14	6.85e-12	0	0	0	0	Idh2|1;Aco2|1;Sdha|1;Sucla2|1;Ogdhl|1;Dlat|1;Cs|1;Pdha1|1;Mdh1|1	9	61	126	53607	http://www.ebi.ac.uk/QuickGO/GTerm?id=GO:0006099	[]
4	4	organic acid metabolic process	GO:0006082	3.11e-14	7.61e-12	0	0	0	0	Dbi|1;Psat1|1;Cltc|1;Etfdh|1;Idh2|1;Aco2|1;Ptges3|1;Lypla1|1;Aldh5a1|1;Ldha|1;Aldh1l1|1;Sdha|1;Decr2|1;Sucla2|1;Glud1|1;Got2|1;Abat|1;Pdhx|1;Ogdhl|1;Pdk1|1;Eno1|1;Dlat|1;Dld|1;Mccc1|1;Cs|1;Acat1|1;Ass1|1;Pdha1|1;Tpi1|1;Fam213b|1;Mdh1|1	31	2560	126	53607	http://www.ebi.ac.uk/QuickGO/GTerm?id=GO:0006082	[]
6	6	purine nucleoside metabolic process	GO:0042278	4.84e-14	1.09e-11	0	0	0	0	Atp5j|1;Mcee|1;Atp5d|1;Atp5h|1;Ndufc2|1;Uqcrb|1;Atp5f1|1;Atp5o|1;Eno1|1;Atp6v0a1|1;Dld|1;Uqcr10|1;Atp5e|1;Atp5a1|1;Pdha1|1;Macrod1|1;Tpi1|1	17	581	126	53607	http://www.ebi.ac.uk/QuickGO/GTerm?id=GO:0042278	[]
8	8	citrate metabolic process	GO:0006101	7.18e-14	1.47e-11	0	0	0	0	Idh2|1;Aco2|1;Sdha|1;Sucla2|1;Ogdhl|1;Dlat|1;Cs|1;Pdha1|1;Mdh1|1	9	68	126	53607	http://www.ebi.ac.uk/QuickGO/GTerm?id=GO:0006101	[]
5	4,5	nucleobase-containing small molecule metabolic process	GO:0055086	7.5e-14	1.47e-11	0	0	0	0	Taldo1|1;Atp5j|1;Mcee|1;Idh2|1;Atp5d|1;Ldha|1;Atp5h|1;Ndufc2|1;Sdha|1;Gpd2|1;Uqcrb|1;Atp5f1|1;Atp5o|1;Pdhx|1;Eno1|1;Dlat|1;Atp6v0a1|1;Dld|1;Cnp|1;Uqcr10|1;Acat1|1;Atp5e|1;Atp5a1|1;Pdha1|1;Macrod1|1;Tpi1|1;Mdh1|1	27	1941	126	53607	http://www.ebi.ac.uk/QuickGO/GTerm?id=GO:0055086	[]
6	6	nucleotide metabolic process	GO:0009117	8.72e-14	1.6e-11	0	0	0	0	Taldo1|1;Atp5j|1;Mcee|1;Idh2|1;Atp5d|1;Ldha|1;Atp5h|1;Ndufc2|1;Sdha|1;Gpd2|1;Uqcrb|1;Atp5f1|1;Atp5o|1;Pdhx|1;Eno1|1;Dlat|1;Atp6v0a1|1;Dld|1;Cnp|1;Uqcr10|1;Acat1|1;Atp5e|1;Atp5a1|1;Pdha1|1;Tpi1|1;Mdh1|1	26	1790	126	53607	http://www.ebi.ac.uk/QuickGO/GTerm?id=GO:0009117	[]
5	5	nucleoside phosphate metabolic process	GO:0006753	1.15e-13	1.99e-11	0	0	0	0	Taldo1|1;Atp5j|1;Mcee|1;Idh2|1;Atp5d|1;Ldha|1;Atp5h|1;Ndufc2|1;Sdha|1;Gpd2|1;Uqcrb|1;Atp5f1|1;Atp5o|1;Pdhx|1;Eno1|1;Dlat|1;Atp6v0a1|1;Dld|1;Cnp|1;Uqcr10|1;Acat1|1;Atp5e|1;Atp5a1|1;Pdha1|1;Tpi1|1;Mdh1|1	26	1812	126	53607	http://www.ebi.ac.uk/QuickGO/GTerm?id=GO:0006753	[]
5	5	coenzyme metabolic process	GO:0006732	3.02e-13	4.93e-11	0	0	0	0	Taldo1|1;Mcee|1;Idh2|1;Ldha|1;Acot9|1;Aldh1l1|1;Gpd2|1;Sucla2|1;Pdhx|1;Pdk1|1;Eno1|1;Dlat|1;Dld|1;Cs|1;Acat1|1;Pdha1|1;Tpi1|1;Mdh1|1	18	761	126	53607	http://www.ebi.ac.uk/QuickGO/GTerm?id=GO:0006732	[]
7	7	purine ribonucleoside metabolic process	GO:0046128	5.27e-13	8.16e-11	0	0	0	0	Atp5j|1;Mcee|1;Atp5d|1;Atp5h|1;Ndufc2|1;Uqcrb|1;Atp5f1|1;Atp5o|1;Eno1|1;Atp6v0a1|1;Dld|1;Uqcr10|1;Atp5e|1;Atp5a1|1;Pdha1|1;Tpi1|1	16	570	126	53607	http://www.ebi.ac.uk/QuickGO/GTerm?id=GO:0046128	[]
3	3	single-organism metabolic process	GO:0044710	6.48e-13	9.54e-11	0	0	0	0	Ep300|1;Dbi|1;Taldo1|1;Atp5j|1;Mcee|1;Afp|1;Tfam|1;Psat1|1;Cltc|1;Jade3|1;Etfdh|1;Idh2|1;Atp5d|1;Rock2|1;Aco2|1;Ptges3|1;Lrpprc|1;Lypla1|1;Aldh5a1|1;Ldha|1;Atp5h|1;Ndufc2|1;Aldh1l1|1;Sdha|1;Prdx3|1;Decr2|1;Gpd2|1;Sucla2|1;Uqcrb|1;Ndufa5|1;Glud1|1;Atp5f1|1;Got2|1;Abat|1;Atp5o|1;Pdhx|1;Ogdhl|1;Anxa5|1;Pdk1|1;Ywhae|1;Sptlc3|1;Iba57|1;Eno1|1;Dlat|1;Pygb|1;Atp6v0a1|1;Dld|1;Cyb5r1|1;Mccc1|1;Cs|1;Cnp|1;…	67	12622	126	53607	http://www.ebi.ac.uk/QuickGO/GTerm?id=GO:0044710	[]
7	7	dicarboxylic acid metabolic process	GO:0043648	8.31e-13	1.16e-10	0	0	0	0	Idh2|1;Aldh5a1|1;Aldh1l1|1;Sdha|1;Sucla2|1;Glud1|1;Got2|1;Dld|1;Cs|1;Ass1|1;Mdh1|1	11	184	126	53607	http://www.ebi.ac.uk/QuickGO/GTerm?id=GO:0043648	[]
7	6,7	aerobic respiration	GO:0009060	1.25e-12	1.67e-10	0	0	0	0	Idh2|1;Aco2|1;Sdha|1;Sucla2|1;Uqcrb|1;Ogdhl|1;Dlat|1;Cs|1;Uqcr10|1;Pdha1|1;Mdh1|1	11	191	126	53607	http://www.ebi.ac.uk/QuickGO/GTerm?id=GO:0009060	[]
5	5	nucleoside metabolic process	GO:0009116	1.73e-12	2.21e-10	0	0	0	0	Atp5j|1;Mcee|1;Atp5d|1;Atp5h|1;Ndufc2|1;Uqcrb|1;Atp5f1|1;Atp5o|1;Eno1|1;Atp6v0a1|1;Dld|1;Uqcr10|1;Atp5e|1;Atp5a1|1;Pdha1|1;Macrod1|1;Tpi1|1	17	727	126	53607	http://www.ebi.ac.uk/QuickGO/GTerm?id=GO:0009116	[]
4	4	thioester metabolic process	GO:0035383	2.1e-12	2.39e-10	0	0	0	0	Mcee|1;Acot9|1;Sucla2|1;Pdhx|1;Pdk1|1;Dlat|1;Dld|1;Cs|1;Acat1|1;Pdha1|1	10	144	126	53607	http://www.ebi.ac.uk/QuickGO/GTerm?id=GO:0035383	[]
6	5,6	acyl-CoA metabolic process	GO:0006637	2.1e-12	2.39e-10	0	0	0	0	Mcee|1;Acot9|1;Sucla2|1;Pdhx|1;Pdk1|1;Dlat|1;Dld|1;Cs|1;Acat1|1;Pdha1|1	10	144	126	53607	http://www.ebi.ac.uk/QuickGO/GTerm?id=GO:0006637	[]
6	6	ribonucleoside metabolic process	GO:0009119	2.16e-12	2.39e-10	0	0	0	0	Atp5j|1;Mcee|1;Atp5d|1;Atp5h|1;Ndufc2|1;Uqcrb|1;Atp5f1|1;Atp5o|1;Eno1|1;Atp6v0a1|1;Dld|1;Uqcr10|1;Atp5e|1;Atp5a1|1;Pdha1|1;Tpi1|1	16	626	126	53607	http://www.ebi.ac.uk/QuickGO/GTerm?id=GO:0009119	[]
9	8,9	ATP metabolic process	GO:0046034	2.19e-12	2.39e-10	0	0	0	0	Atp5j|1;Atp5d|1;Ldha|1;Atp5h|1;Ndufc2|1;Sdha|1;Uqcrb|1;Atp5f1|1;Atp5o|1;Eno1|1;Atp6v0a1|1;Dld|1;Uqcr10|1;Atp5e|1;Atp5a1|1;Pdha1|1;Tpi1|1	17	738	126	53607	http://www.ebi.ac.uk/QuickGO/GTerm?id=GO:0046034	[]
4	4	glycosyl compound metabolic process	GO:1901657	3.62e-12	3.81e-10	0	0	0	0	Atp5j|1;Mcee|1;Atp5d|1;Atp5h|1;Ndufc2|1;Uqcrb|1;Atp5f1|1;Atp5o|1;Eno1|1;Atp6v0a1|1;Dld|1;Uqcr10|1;Atp5e|1;Atp5a1|1;Pdha1|1;Macrod1|1;Tpi1|1	17	762	126	53607	http://www.ebi.ac.uk/QuickGO/GTerm?id=GO:1901657	[]
8	8	purine ribonucleoside triphosphate metabolic process	GO:0009205	7.62e-12	7.73e-10	0	0	0	0	Atp5j|1;Atp5d|1;Ldha|1;Atp5h|1;Ndufc2|1;Sdha|1;Uqcrb|1;Atp5f1|1;Atp5o|1;Eno1|1;Atp6v0a1|1;Dld|1;Uqcr10|1;Atp5e|1;Atp5a1|1;Pdha1|1;Tpi1|1	17	799	126	53607	http://www.ebi.ac.uk/QuickGO/GTerm?id=GO:0009205	[]
7	7	ribonucleoside triphosphate metabolic process	GO:0009199	9.25e-12	9.07e-10	0	0	0	0	Atp5j|1;Atp5d|1;Ldha|1;Atp5h|1;Ndufc2|1;Sdha|1;Uqcrb|1;Atp5f1|1;Atp5o|1;Eno1|1;Atp6v0a1|1;Dld|1;Uqcr10|1;Atp5e|1;Atp5a1|1;Pdha1|1;Tpi1|1	17	809	126	53607	http://www.ebi.ac.uk/QuickGO/GTerm?id=GO:0009199	[]
8	8	purine ribonucleoside monophosphate metabolic process	GO:0009167	1.06e-11	9.91e-10	0	0	0	0	Atp5j|1;Atp5d|1;Ldha|1;Atp5h|1;Ndufc2|1;Sdha|1;Uqcrb|1;Atp5f1|1;Atp5o|1;Eno1|1;Atp6v0a1|1;Dld|1;Uqcr10|1;Atp5e|1;Atp5a1|1;Pdha1|1;Tpi1|1	17	816	126	53607	http://www.ebi.ac.uk/QuickGO/GTerm?id=GO:0009167	[]
7	7	purine nucleoside monophosphate metabolic process	GO:0009126	1.08e-11	9.91e-10	0	0	0	0	Atp5j|1;Atp5d|1;Ldha|1;Atp5h|1;Ndufc2|1;Sdha|1;Uqcrb|1;Atp5f1|1;Atp5o|1;Eno1|1;Atp6v0a1|1;Dld|1;Uqcr10|1;Atp5e|1;Atp5a1|1;Pdha1|1;Tpi1|1	17	817	126	53607	http://www.ebi.ac.uk/QuickGO/GTerm?id=GO:0009126	[]
7	7	purine nucleoside triphosphate metabolic process	GO:0009144	1.16e-11	1.04e-09	0	0	0	0	Atp5j|1;Atp5d|1;Ldha|1;Atp5h|1;Ndufc2|1;Sdha|1;Uqcrb|1;Atp5f1|1;Atp5o|1;Eno1|1;Atp6v0a1|1;Dld|1;Uqcr10|1;Atp5e|1;Atp5a1|1;Pdha1|1;Tpi1|1	17	821	126	53607	http://www.ebi.ac.uk/QuickGO/GTerm?id=GO:0009144	[]
7	7	ribonucleoside monophosphate metabolic process	GO:0009161	2.23e-11	1.9e-09	0	0	0	0	Atp5j|1;Atp5d|1;Ldha|1;Atp5h|1;Ndufc2|1;Sdha|1;Uqcrb|1;Atp5f1|1;Atp5o|1;Eno1|1;Atp6v0a1|1;Dld|1;Uqcr10|1;Atp5e|1;Atp5a1|1;Pdha1|1;Tpi1|1	17	856	126	53607	http://www.ebi.ac.uk/QuickGO/GTerm?id=GO:0009161	[]
4	4	organophosphate metabolic process	GO:0019637	2.26e-11	1.9e-09	0	0	0	0	Dbi|1;Taldo1|1;Atp5j|1;Mcee|1;Idh2|1;Atp5d|1;Aldh5a1|1;Ldha|1;Atp5h|1;Ndufc2|1;Sdha|1;Gpd2|1;Uqcrb|1;Atp5f1|1;Atp5o|1;Pdhx|1;Eno1|1;Dlat|1;Atp6v0a1|1;Dld|1;Cnp|1;Uqcr10|1;Acat1|1;Atp5e|1;Atp5a1|1;Rac1|1;Pdha1|1;Tpi1|1;Mdh1|1	29	2883	126	53607	http://www.ebi.ac.uk/QuickGO/GTerm?id=GO:0019637	[]
9	8,9	energy coupled proton transport, down electrochemical gradient	GO:0015985	2.53e-11	2.01e-09	0	0	0	0	Atp5j|1;Atp5d|1;Atp5h|1;Atp5f1|1;Atp5o|1;Atp6v0a1|1;Atp5e|1;Atp5a1|1	8	83	126	53607	http://www.ebi.ac.uk/QuickGO/GTerm?id=GO:0015985	[]
10	9,10	ATP synthesis coupled proton transport	GO:0015986	2.53e-11	2.01e-09	0	0	0	0	Atp5j|1;Atp5d|1;Atp5h|1;Atp5f1|1;Atp5o|1;Atp6v0a1|1;Atp5e|1;Atp5a1|1	8	83	126	53607	http://www.ebi.ac.uk/QuickGO/GTerm?id=GO:0015986	[]
6	6	nucleoside triphosphate metabolic process	GO:0009141	2.66e-11	2.06e-09	0	0	0	0	Atp5j|1;Atp5d|1;Ldha|1;Atp5h|1;Ndufc2|1;Sdha|1;Uqcrb|1;Atp5f1|1;Atp5o|1;Eno1|1;Atp6v0a1|1;Dld|1;Uqcr10|1;Atp5e|1;Atp5a1|1;Pdha1|1;Tpi1|1	17	866	126	53607	http://www.ebi.ac.uk/QuickGO/GTerm?id=GO:0009141	[]
6	6	nucleoside monophosphate metabolic process	GO:0009123	3.93e-11	2.96e-09	0	0	0	0	Atp5j|1;Atp5d|1;Ldha|1;Atp5h|1;Ndufc2|1;Sdha|1;Uqcrb|1;Atp5f1|1;Atp5o|1;Eno1|1;Atp6v0a1|1;Dld|1;Uqcr10|1;Atp5e|1;Atp5a1|1;Pdha1|1;Tpi1|1	17	888	126	53607	http://www.ebi.ac.uk/QuickGO/GTerm?id=GO:0009123	[]
10	9,10	ATP biosynthetic process	GO:0006754	1.16e-10	8.51e-09	0	0	0	0	Atp5j|1;Atp5d|1;Atp5h|1;Ndufc2|1;Atp5f1|1;Atp5o|1;Atp6v0a1|1;Atp5e|1;Atp5a1|1	9	152	126	53607	http://www.ebi.ac.uk/QuickGO/GTerm?id=GO:0006754	[]
5	5	ribose phosphate metabolic process	GO:0019693	1.47e-10	1.05e-08	0	0	0	0	Taldo1|1;Atp5j|1;Mcee|1;Atp5d|1;Ldha|1;Atp5h|1;Ndufc2|1;Sdha|1;Uqcrb|1;Atp5f1|1;Atp5o|1;Eno1|1;Atp6v0a1|1;Dld|1;Uqcr10|1;Acat1|1;Atp5e|1;Atp5a1|1;Pdha1|1;Tpi1|1	20	1418	126	53607	http://www.ebi.ac.uk/QuickGO/GTerm?id=GO:0019693	[]
7	6,7	acetyl-CoA metabolic process	GO:0006084	1.66e-10	1.16e-08	0	0	0	0	Pdhx|1;Pdk1|1;Dlat|1;Dld|1;Cs|1;Acat1|1;Pdha1|1	7	63	126	53607	http://www.ebi.ac.uk/QuickGO/GTerm?id=GO:0006084	[]
8	7,8	acetyl-CoA biosynthetic process	GO:0006085	3.27e-10	2.24e-08	0	0	0	0	Pdhx|1;Pdk1|1;Dlat|1;Dld|1;Acat1|1;Pdha1|1	6	37	126	53607	http://www.ebi.ac.uk/QuickGO/GTerm?id=GO:0006085	[]
9	5,8,9	acetyl-CoA biosynthetic process from pyruvate	GO:0006086	4.01e-10	2.68e-08	0	0	0	0	Pdhx|1;Pdk1|1;Dlat|1;Dld|1;Pdha1|1	5	17	126	53607	http://www.ebi.ac.uk/QuickGO/GTerm?id=GO:0006086	[]
7	7	purine ribonucleotide metabolic process	GO:0009150	4.21e-10	2.75e-08	0	0	0	0	Atp5j|1;Mcee|1;Atp5d|1;Ldha|1;Atp5h|1;Ndufc2|1;Sdha|1;Uqcrb|1;Atp5f1|1;Atp5o|1;Eno1|1;Atp6v0a1|1;Dld|1;Uqcr10|1;Acat1|1;Atp5e|1;Atp5a1|1;Pdha1|1;Tpi1|1	19	1343	126	53607	http://www.ebi.ac.uk/QuickGO/GTerm?id=GO:0009150	[]
5	5	purine-containing compound metabolic process	GO:0072521	5.05e-10	3.23e-08	0	0	0	0	Atp5j|1;Mcee|1;Atp5d|1;Ldha|1;Atp5h|1;Ndufc2|1;Sdha|1;Uqcrb|1;Atp5f1|1;Atp5o|1;Eno1|1;Atp6v0a1|1;Dld|1;Uqcr10|1;Acat1|1;Atp5e|1;Atp5a1|1;Pdha1|1;Macrod1|1;Tpi1|1	20	1523	126	53607	http://www.ebi.ac.uk/QuickGO/GTerm?id=GO:0072521	[]
7	6,7	ribonucleotide metabolic process	GO:0009259	6.67e-10	4.18e-08	0	0	0	0	Atp5j|1;Mcee|1;Atp5d|1;Ldha|1;Atp5h|1;Ndufc2|1;Sdha|1;Uqcrb|1;Atp5f1|1;Atp5o|1;Eno1|1;Atp6v0a1|1;Dld|1;Uqcr10|1;Acat1|1;Atp5e|1;Atp5a1|1;Pdha1|1;Tpi1|1	19	1381	126	53607	http://www.ebi.ac.uk/QuickGO/GTerm?id=GO:0009259	[]
6	6	purine nucleotide metabolic process	GO:0006163	7.17e-10	4.39e-08	0	0	0	0	Atp5j|1;Mcee|1;Atp5d|1;Ldha|1;Atp5h|1;Ndufc2|1;Sdha|1;Uqcrb|1;Atp5f1|1;Atp5o|1;Eno1|1;Atp6v0a1|1;Dld|1;Uqcr10|1;Acat1|1;Atp5e|1;Atp5a1|1;Pdha1|1;Tpi1|1	19	1387	126	53607	http://www.ebi.ac.uk/QuickGO/GTerm?id=GO:0006163	[]
9	8,9	purine ribonucleoside triphosphate biosynthetic process	GO:0009206	8.02e-10	4.82e-08	0	0	0	0	Atp5j|1;Atp5d|1;Atp5h|1;Ndufc2|1;Atp5f1|1;Atp5o|1;Atp6v0a1|1;Atp5e|1;Atp5a1|1	9	189	126	53607	http://www.ebi.ac.uk/QuickGO/GTerm?id=GO:0009206	[]
8	7,8	purine nucleoside triphosphate biosynthetic process	GO:0009145	8.41e-10	4.94e-08	0	0	0	0	Atp5j|1;Atp5d|1;Atp5h|1;Ndufc2|1;Atp5f1|1;Atp5o|1;Atp6v0a1|1;Atp5e|1;Atp5a1|1	9	190	126	53607	http://www.ebi.ac.uk/QuickGO/GTerm?id=GO:0009145	[]
8	7,8	ribonucleoside triphosphate biosynthetic process	GO:0009201	1.21e-09	6.97e-08	0	0	0	0	Atp5j|1;Atp5d|1;Atp5h|1;Ndufc2|1;Atp5f1|1;Atp5o|1;Atp6v0a1|1;Atp5e|1;Atp5a1|1	9	198	126	53607	http://www.ebi.ac.uk/QuickGO/GTerm?id=GO:0009201	[]
4	4	sulfur compound metabolic process	GO:0006790	1.25e-09	7.09e-08	0	0	0	0	Mcee|1;Aldh5a1|1;Acot9|1;Sucla2|1;Pdhx|1;Pdk1|1;Iba57|1;Dlat|1;Dld|1;Cs|1;Acat1|1;Hspa9|1;Pdha1|1;Oplah|1	14	697	126	53607	http://www.ebi.ac.uk/QuickGO/GTerm?id=GO:0006790	[]
5	5	substantia nigra development	GO:0021762	1.48e-09	8.23e-08	0	0	0	0	Ywhaq|1;Atp5j|1;Atp5f1|1;Ywhae|1;Cnp|1;Basp1|1	6	47	126	53607	http://www.ebi.ac.uk/QuickGO/GTerm?id=GO:0021762	[]
5	4,5	single-organism transport	GO:0044765	1.76e-09	9.57e-08	0	0	0	0	Ywhaq|1;Ywhaz|1;Ep300|1;Dbi|1;Atp5j|1;Ywhag|1;Hbb-b1|1;Hnrnpa2b1|1;Cltc|1;Slc25a3|1;Cyfip1|1;Idh2|1;Atp5d|1;Lypla1|1;Atp5h|1;Gnao1|1;Ube2o|1;Sptbn1|1;Ppp3ca|1;Uqcrb|1;Glud1|1;Atp5f1|1;Got2|1;Abat|1;Atp5o|1;Atp2b1|1;Hba|1;Anxa5|1;Ywhae|1;Syn1|1;Atp6v0a1|1;Cyb5r1|1;Hnrnpm|1;Cnp|1;Uqcr10|1;Anxa6|1;Sept5|1;Copa|1;Atp5e|1;Hsp90ab1|1;Atp5a1|1;Slc1a2|1;Rac1|1;Sh3gl2|1;Hspd1|1;Hspa9|1;Slc12a2|1;Amph|1;Sl…	51	9499	126	53607	http://www.ebi.ac.uk/QuickGO/GTerm?id=GO:0044765	[]
7	7	monocarboxylic acid metabolic process	GO:0032787	2.1e-09	1.07e-07	0	0	0	0	Dbi|1;Etfdh|1;Idh2|1;Ptges3|1;Lypla1|1;Aldh5a1|1;Ldha|1;Decr2|1;Abat|1;Pdhx|1;Pdk1|1;Eno1|1;Dlat|1;Dld|1;Acat1|1;Pdha1|1;Tpi1|1;Fam213b|1	18	1314	126	53607	http://www.ebi.ac.uk/QuickGO/GTerm?id=GO:0032787	[]
9	8,9	purine ribonucleoside monophosphate biosynthetic process	GO:0009168	2.11e-09	1.07e-07	0	0	0	0	Atp5j|1;Atp5d|1;Atp5h|1;Ndufc2|1;Atp5f1|1;Atp5o|1;Atp6v0a1|1;Atp5e|1;Atp5a1|1	9	211	126	53607	http://www.ebi.ac.uk/QuickGO/GTerm?id=GO:0009168	[]
8	7,8	purine nucleoside monophosphate biosynthetic process	GO:0009127	2.11e-09	1.07e-07	0	0	0	0	Atp5j|1;Atp5d|1;Atp5h|1;Ndufc2|1;Atp5f1|1;Atp5o|1;Atp6v0a1|1;Atp5e|1;Atp5a1|1	9	211	126	53607	http://www.ebi.ac.uk/QuickGO/GTerm?id=GO:0009127	[]
7	6,7	acyl-CoA biosynthetic process	GO:0071616	2.18e-09	1.07e-07	0	0	0	0	Pdhx|1;Pdk1|1;Dlat|1;Dld|1;Acat1|1;Pdha1|1	6	50	126	53607	http://www.ebi.ac.uk/QuickGO/GTerm?id=GO:0071616	[]
5	5	thioester biosynthetic process	GO:0035384	2.18e-09	1.07e-07	0	0	0	0	Pdhx|1;Pdk1|1;Dlat|1;Dld|1;Acat1|1;Pdha1|1	6	50	126	53607	http://www.ebi.ac.uk/QuickGO/GTerm?id=GO:0035384	[]
8	7,8	nicotinamide nucleotide metabolic process	GO:0046496	2.21e-09	1.07e-07	0	0	0	0	Taldo1|1;Idh2|1;Ldha|1;Gpd2|1;Pdhx|1;Eno1|1;Dlat|1;Dld|1;Pdha1|1;Tpi1|1;Mdh1|1	11	385	126	53607	http://www.ebi.ac.uk/QuickGO/GTerm?id=GO:0046496	[]
7	6,7	pyridine nucleotide metabolic process	GO:0019362	2.21e-09	1.07e-07	0	0	0	0	Taldo1|1;Idh2|1;Ldha|1;Gpd2|1;Pdhx|1;Eno1|1;Dlat|1;Dld|1;Pdha1|1;Tpi1|1;Mdh1|1	11	385	126	53607	http://www.ebi.ac.uk/QuickGO/GTerm?id=GO:0019362	[]
3	3	single-organism localization	GO:1902578	2.25e-09	1.07e-07	0	0	0	0	Ywhaq|1;Ywhaz|1;Ep300|1;Dbi|1;Atp5j|1;Ywhag|1;Hbb-b1|1;Hnrnpa2b1|1;Cltc|1;Slc25a3|1;Cyfip1|1;Idh2|1;Atp5d|1;Rock2|1;Lypla1|1;Atp5h|1;Gnao1|1;Ube2o|1;Sptbn1|1;Ppp3ca|1;Uqcrb|1;Glud1|1;Atp5f1|1;Got2|1;Abat|1;Atp5o|1;Atp2b1|1;Hba|1;Anxa5|1;Ywhae|1;Syn1|1;Atp6v0a1|1;Cyb5r1|1;Hnrnpm|1;Cnp|1;Uqcr10|1;Anxa6|1;Sept5|1;Copa|1;Atp5e|1;Hsp90ab1|1;Atp5a1|1;Slc1a2|1;Rac1|1;Sh3gl2|1;Hspd1|1;Hspa9|1;Slc12a2|1;A…	53	10201	126	53607	http://www.ebi.ac.uk/QuickGO/GTerm?id=GO:1902578	[]
5	5	pyridine-containing compound metabolic process	GO:0072524	2.74e-09	1.28e-07	0	0	0	0	Taldo1|1;Idh2|1;Ldha|1;Gpd2|1;Pdhx|1;Eno1|1;Dlat|1;Dld|1;Pdha1|1;Tpi1|1;Mdh1|1	11	393	126	53607	http://www.ebi.ac.uk/QuickGO/GTerm?id=GO:0072524	[]
7	6,7	nucleoside triphosphate biosynthetic process	GO:0009142	3.04e-09	1.4e-07	0	0	0	0	Atp5j|1;Atp5d|1;Atp5h|1;Ndufc2|1;Atp5f1|1;Atp5o|1;Atp6v0a1|1;Atp5e|1;Atp5a1|1	9	220	126	53607	http://www.ebi.ac.uk/QuickGO/GTerm?id=GO:0009142	[]
10	6,9,10	mitochondrial acetyl-CoA biosynthetic process from pyruvate	GO:0061732	3.63e-09	1.64e-07	0	0	0	0	Pdhx|1;Dlat|1;Dld|1;Pdha1|1	4	9	126	53607	http://www.ebi.ac.uk/QuickGO/GTerm?id=GO:0061732	[]
8	7,8	hydrogen ion transmembrane transport	GO:1902600	3.98e-09	1.77e-07	0	0	0	0	Atp5j|1;Atp5d|1;Atp5h|1;Uqcrb|1;Atp5f1|1;Atp5o|1;Atp6v0a1|1;Uqcr10|1;Atp5e|1;Atp5a1|1	10	311	126	53607	http://www.ebi.ac.uk/QuickGO/GTerm?id=GO:1902600	[]
4	4	phosphorus metabolic process	GO:0006793	4.18e-09	1.83e-07	0	0	0	0	Ep300|1;Dbi|1;Taldo1|1;Atp5j|1;Hbb-b1|1;Mcee|1;Idh2|1;Atp5d|1;Rock2|1;Ppa2|1;Ptges3|1;Aldh5a1|1;Ldha|1;Atp5h|1;Acot9|1;Ndufc2|1;Sdha|1;Prdx3|1;Sptbn1|1;Gpd2|1;Sucla2|1;Ppp3ca|1;Uqcrb|1;Atp5f1|1;Atp5o|1;Pdhx|1;Pdk1|1;Ywhae|1;Eno1|1;Dlat|1;Atp6v0a1|1;Dld|1;Cs|1;Cnp|1;Uqcr10|1;Top1|1;Nt5dc3|1;Acat1|1;Atp5e|1;Hsp90ab1|1;Atp5a1|1;Rac1|1;Hspa9|1;Pdha1|1;Tpi1|1;Mdh1|1	46	8190	126	53607	http://www.ebi.ac.uk/QuickGO/GTerm?id=GO:0006793	[]
4	4	organonitrogen compound metabolic process	GO:1901564	6.81e-09	2.95e-07	0	0	0	0	Ep300|1;Dbi|1;Spta1|1;Taldo1|1;Atp5j|1;Hbb-b1|1;Mcee|1;Hnrnpa2b1|1;Psat1|1;Cltc|1;Cyfip1|1;Jade3|1;Idh2|1;Atp5d|1;Rock2|1;Ppa2|1;Lrpprc|1;Lypla1|1;Aldh5a1|1;Ldha|1;Atp5h|1;Ndufc2|1;Aldh1l1|1;Sdha|1;Prdx3|1;Ube2o|1;Sptbn1|1;Gpd2|1;Ppp3ca|1;Uqcrb|1;Glud1|1;Atp5f1|1;Got2|1;Abat|1;Atp5o|1;Pdhx|1;Eef2|1;Pdk1|1;Ywhae|1;Sptlc3|1;Iba57|1;Eno1|1;Dlat|1;Pura|1;Atp6v0a1|1;Dld|1;Mccc1|1;Aldh7a1|1;Uqcr10|1;To…	65	14645	126	53607	http://www.ebi.ac.uk/QuickGO/GTerm?id=GO:1901564	[]
6	6	oxidoreduction coenzyme metabolic process	GO:0006733	9.19e-09	3.92e-07	0	0	0	0	Taldo1|1;Idh2|1;Ldha|1;Gpd2|1;Pdhx|1;Eno1|1;Dlat|1;Dld|1;Pdha1|1;Tpi1|1;Mdh1|1	11	442	126	53607	http://www.ebi.ac.uk/QuickGO/GTerm?id=GO:0006733	[]
8	7,8	ribonucleoside monophosphate biosynthetic process	GO:0009156	9.58e-09	4.02e-07	0	0	0	0	Atp5j|1;Atp5d|1;Atp5h|1;Ndufc2|1;Atp5f1|1;Atp5o|1;Atp6v0a1|1;Atp5e|1;Atp5a1|1	9	251	126	53607	http://www.ebi.ac.uk/QuickGO/GTerm?id=GO:0009156	[]
7	7	purine nucleoside biosynthetic process	GO:0042451	1.04e-08	4.24e-07	0	0	0	0	Atp5j|1;Atp5d|1;Atp5h|1;Atp5f1|1;Atp5o|1;Atp6v0a1|1;Atp5e|1;Atp5a1|1	8	176	126	53607	http://www.ebi.ac.uk/QuickGO/GTerm?id=GO:0042451	[]
8	8	purine ribonucleoside biosynthetic process	GO:0046129	1.04e-08	4.24e-07	0	0	0	0	Atp5j|1;Atp5d|1;Atp5h|1;Atp5f1|1;Atp5o|1;Atp6v0a1|1;Atp5e|1;Atp5a1|1	8	176	126	53607	http://www.ebi.ac.uk/QuickGO/GTerm?id=GO:0046129	[]
7	6,7	nucleoside monophosphate biosynthetic process	GO:0009124	2.24e-08	9.03e-07	0	0	0	0	Atp5j|1;Atp5d|1;Atp5h|1;Ndufc2|1;Atp5f1|1;Atp5o|1;Atp6v0a1|1;Atp5e|1;Atp5a1|1	9	277	126	53607	http://www.ebi.ac.uk/QuickGO/GTerm?id=GO:0009124	[]
5	5	cofactor biosynthetic process	GO:0051188	2.78e-08	1.1e-06	0	0	0	0	Spta1|1;Idh2|1;Pdhx|1;Pdk1|1;Iba57|1;Dlat|1;Dld|1;Acat1|1;Hspa9|1;Pdha1|1	10	382	126	53607	http://www.ebi.ac.uk/QuickGO/GTerm?id=GO:0051188	[]
3	3	establishment of localization	GO:0051234	3.66e-08	1.43e-06	0	0	0	0	Ywhaq|1;Ywhaz|1;Ep300|1;Dbi|1;Hnrnpa1|1;Atp5j|1;Ywhag|1;Hbb-b1|1;Afp|1;Hnrnpa2b1|1;Cltc|1;Slc25a3|1;Cyfip1|1;Idh2|1;Atp5d|1;Rock2|1;Lrpprc|1;Lypla1|1;Atp5h|1;Gnao1|1;Ube2o|1;Sptbn1|1;Ppp3ca|1;Uqcrb|1;Glud1|1;Atp5f1|1;Got2|1;Abat|1;Atp5o|1;Atp2b1|1;Hba|1;Anxa5|1;Ywhae|1;H2afy2|1;Syn1|1;Atp6v0a1|1;Cyb5r1|1;Psd3|1;Hnrnpm|1;Cnp|1;Uqcr10|1;Anxa6|1;Sept5|1;Copa|1;Atp5e|1;Hsp90ab1|1;Atp5a1|1;Slc1a2|1;Ra…	57	12386	126	53607	http://www.ebi.ac.uk/QuickGO/GTerm?id=GO:0051234	[]
5	5	organonitrogen compound biosynthetic process	GO:1901566	3.77e-08	1.46e-06	0	0	0	0	Ep300|1;Spta1|1;Atp5j|1;Hbb-b1|1;Hnrnpa2b1|1;Psat1|1;Cltc|1;Cyfip1|1;Idh2|1;Atp5d|1;Lrpprc|1;Atp5h|1;Ndufc2|1;Ppp3ca|1;Glud1|1;Atp5f1|1;Got2|1;Abat|1;Atp5o|1;Eef2|1;Sptlc3|1;Iba57|1;Pura|1;Atp6v0a1|1;Aldh7a1|1;Acat1|1;Atp5e|1;Ass1|1;Atp5a1|1;Calr|1	30	4241	126	53607	http://www.ebi.ac.uk/QuickGO/GTerm?id=GO:1901566	[]
7	6,7	proton transport	GO:0015992	4.27e-08	1.63e-06	0	0	0	0	Atp5j|1;Atp5d|1;Atp5h|1;Uqcrb|1;Atp5f1|1;Atp5o|1;Atp6v0a1|1;Uqcr10|1;Atp5e|1;Atp5a1|1	10	400	126	53607	http://www.ebi.ac.uk/QuickGO/GTerm?id=GO:0015992	[]
6	5,6	hydrogen transport	GO:0006818	4.8e-08	1.79e-06	0	0	0	0	Atp5j|1;Atp5d|1;Atp5h|1;Uqcrb|1;Atp5f1|1;Atp5o|1;Atp6v0a1|1;Uqcr10|1;Atp5e|1;Atp5a1|1	10	405	126	53607	http://www.ebi.ac.uk/QuickGO/GTerm?id=GO:0006818	[]
4	4	carbohydrate derivative metabolic process	GO:1901135	4.81e-08	1.79e-06	0	0	0	0	Ep300|1;Taldo1|1;Atp5j|1;Mcee|1;Cltc|1;Atp5d|1;Aldh5a1|1;Ldha|1;Atp5h|1;Ndufc2|1;Sdha|1;Gpd2|1;Uqcrb|1;Atp5f1|1;Atp5o|1;Eno1|1;Atp6v0a1|1;Dld|1;Uqcr10|1;Acat1|1;Atp5e|1;Atp5a1|1;Pdha1|1;Macrod1|1;Tpi1|1	25	3077	126	53607	http://www.ebi.ac.uk/QuickGO/GTerm?id=GO:1901135	[]
2	2	metabolic process	GO:0008152	5.66e-08	2.03e-06	0	0	0	0	Ywhaq|1;Cbx1|1;Pabpc1|1;H2afz|1;Ep300|1;Dbi|1;Spta1|1;H2afj|1;Hnrnpa1|1;Taldo1|1;Atp5j|1;Hbb-b1|1;Mcee|1;Afp|1;Tfam|1;Hmgn2|1;Hnrnpa2b1|1;Psat1|1;Cltc|1;Cyfip1|1;Jade3|1;Etfdh|1;Idh2|1;Atp5d|1;Rock2|1;Taf6|1;Aco2|1;Ppa2|1;Ptges3|1;Lrpprc|1;Lypla1|1;Aldh5a1|1;Clybl|1;Ldha|1;Atp5h|1;Acot9|1;Ndufc2|1;Aldh1l1|1;Sdha|1;Prdx3|1;Gnao1|1;Ube2o|1;Decr2|1;Sptbn1|1;Gpd2|1;Sucla2|1;Gnai1|1;Ppp3ca|1;Uqcrb|1;P…	106	33333	126	53607	http://www.ebi.ac.uk/QuickGO/GTerm?id=GO:0008152	[]
6	6	nucleoside biosynthetic process	GO:0009163	5.67e-08	2.03e-06	0	0	0	0	Atp5j|1;Atp5d|1;Atp5h|1;Atp5f1|1;Atp5o|1;Atp6v0a1|1;Atp5e|1;Atp5a1|1	8	219	126	53607	http://www.ebi.ac.uk/QuickGO/GTerm?id=GO:0009163	[]
7	7	ribonucleoside biosynthetic process	GO:0042455	5.67e-08	2.03e-06	0	0	0	0	Atp5j|1;Atp5d|1;Atp5h|1;Atp5f1|1;Atp5o|1;Atp6v0a1|1;Atp5e|1;Atp5a1|1	8	219	126	53607	http://www.ebi.ac.uk/QuickGO/GTerm?id=GO:0042455	[]
6	5,6	glycosyl compound biosynthetic process	GO:1901659	6.52e-08	2.31e-06	0	0	0	0	Atp5j|1;Atp5d|1;Atp5h|1;Atp5f1|1;Atp5o|1;Atp6v0a1|1;Atp5e|1;Atp5a1|1	8	223	126	53607	http://www.ebi.ac.uk/QuickGO/GTerm?id=GO:1901659	[]
3	3	cellular metabolic process	GO:0044237	6.85e-08	2.4e-06	0	0	0	0	Ywhaq|1;Cbx1|1;Pabpc1|1;H2afz|1;Ep300|1;Dbi|1;Spta1|1;H2afj|1;Hnrnpa1|1;Taldo1|1;Atp5j|1;Hbb-b1|1;Mcee|1;Afp|1;Tfam|1;Hmgn2|1;Hnrnpa2b1|1;Psat1|1;Cltc|1;Cyfip1|1;Jade3|1;Etfdh|1;Idh2|1;Atp5d|1;Rock2|1;Taf6|1;Aco2|1;Ppa2|1;Ptges3|1;Lrpprc|1;Lypla1|1;Aldh5a1|1;Ldha|1;Atp5h|1;Acot9|1;Ndufc2|1;Aldh1l1|1;Sdha|1;Prdx3|1;Ube2o|1;Decr2|1;Sptbn1|1;Gpd2|1;Sucla2|1;Ppp3ca|1;Uqcrb|1;Hspa4l|1;Ndufa5|1;Glud1|1…	96	28432	126	53607	http://www.ebi.ac.uk/QuickGO/GTerm?id=GO:0044237	[]
3	3	single-organism cellular process	GO:0044763	7.25e-08	2.51e-06	0	0	0	0	Ywhaq|1;Ywhaz|1;Pabpc1|1;H2afz|1;Ep300|1;Dbi|1;Spta1|1;H2afj|1;Taldo1|1;Atp5j|1;Sept11|1;Ywhag|1;Hbb-b1|1;Mcee|1;Afp|1;Tfam|1;Hnrnpa2b1|1;Psat1|1;Cltc|1;Negr1|1;Slc25a3|1;Cyfip1|1;Jade3|1;Etfdh|1;Idh2|1;Atp5d|1;Rock2|1;Taf6|1;Aco2|1;Ptges3|1;Lrpprc|1;Lypla1|1;Aldh5a1|1;Immt|1;Ldha|1;Atp5h|1;Dnajc5|1;Ndufc2|1;Aldh1l1|1;Sdha|1;Prdx3|1;Gnao1|1;Ube2o|1;Decr2|1;Sptbn1|1;Gpd2|1;Sucla2|1;Gnai1|1;Ppp3ca|…	105	32920	126	53607	http://www.ebi.ac.uk/QuickGO/GTerm?id=GO:0044763	[]
4	4	transport	GO:0006810	8.11e-08	2.77e-06	0	0	0	0	Ywhaq|1;Ywhaz|1;Ep300|1;Dbi|1;Hnrnpa1|1;Atp5j|1;Ywhag|1;Hbb-b1|1;Afp|1;Hnrnpa2b1|1;Cltc|1;Slc25a3|1;Cyfip1|1;Idh2|1;Atp5d|1;Lrpprc|1;Lypla1|1;Atp5h|1;Gnao1|1;Ube2o|1;Sptbn1|1;Ppp3ca|1;Uqcrb|1;Glud1|1;Atp5f1|1;Got2|1;Abat|1;Atp5o|1;Atp2b1|1;Hba|1;Anxa5|1;Ywhae|1;Syn1|1;Atp6v0a1|1;Cyb5r1|1;Psd3|1;Hnrnpm|1;Cnp|1;Uqcr10|1;Anxa6|1;Sept5|1;Copa|1;Atp5e|1;Hsp90ab1|1;Atp5a1|1;Slc1a2|1;Rac1|1;Sh3gl2|1;Hsp…	55	11966	126	53607	http://www.ebi.ac.uk/QuickGO/GTerm?id=GO:0006810	[]
5	5	phosphate-containing compound metabolic process	GO:0006796	8.38e-08	2.83e-06	0	0	0	0	Ep300|1;Dbi|1;Taldo1|1;Atp5j|1;Hbb-b1|1;Mcee|1;Idh2|1;Atp5d|1;Rock2|1;Ppa2|1;Ptges3|1;Aldh5a1|1;Ldha|1;Atp5h|1;Ndufc2|1;Sdha|1;Prdx3|1;Sptbn1|1;Gpd2|1;Ppp3ca|1;Uqcrb|1;Atp5f1|1;Atp5o|1;Pdhx|1;Pdk1|1;Ywhae|1;Eno1|1;Dlat|1;Atp6v0a1|1;Dld|1;Cnp|1;Uqcr10|1;Top1|1;Nt5dc3|1;Acat1|1;Atp5e|1;Hsp90ab1|1;Atp5a1|1;Rac1|1;Hspa9|1;Pdha1|1;Tpi1|1;Mdh1|1	43	8078	126	53607	http://www.ebi.ac.uk/QuickGO/GTerm?id=GO:0006796	[]
4	4	midbrain development	GO:0030901	1.43e-07	4.78e-06	0	0	0	0	Ywhaq|1;Atp5j|1;Atp5f1|1;Ywhae|1;Cnp|1;Basp1|1;Rac1|1	7	165	126	53607	http://www.ebi.ac.uk/QuickGO/GTerm?id=GO:0030901	[]
8	7,8	dicarboxylic acid catabolic process	GO:0043649	2.06e-07	6.81e-06	0	0	0	0	Aldh5a1|1;Aldh1l1|1;Glud1|1;Got2|1	4	22	126	53607	http://www.ebi.ac.uk/QuickGO/GTerm?id=GO:0043649	[]
4	4	neural nucleus development	GO:0048857	2.23e-07	7.27e-06	0	0	0	0	Ywhaq|1;Atp5j|1;Atp5f1|1;Ywhae|1;Cnp|1;Basp1|1	6	107	126	53607	http://www.ebi.ac.uk/QuickGO/GTerm?id=GO:0048857	[]
5	5	mitochondrion organization	GO:0007005	4.22e-07	1.37e-05	0	0	0	0	Ywhaz|1;Tfam|1;Lrpprc|1;Immt|1;Ndufc2|1;Prdx3|1;Uqcrb|1;Ndufa5|1;Anxa5|1;Pdk1|1;Cyb5r1|1;Cnp|1;Uqcr10|1;Ndufb4|1;Hspd1|1;Mdh1|1	16	1477	126	53607	http://www.ebi.ac.uk/QuickGO/GTerm?id=GO:0007005	[]
6	5,6	respiratory electron transport chain	GO:0022904	5.2e-07	1.66e-05	0	0	0	0	Etfdh|1;Aldh5a1|1;Ndufc2|1;Sdha|1;Uqcrb|1;Ndufa5|1;Dld|1;Uqcr10|1	8	293	126	53607	http://www.ebi.ac.uk/QuickGO/GTerm?id=GO:0022904	[]
8	8	pyruvate metabolic process	GO:0006090	6.21e-07	1.97e-05	0	0	0	0	Ldha|1;Pdhx|1;Pdk1|1;Eno1|1;Dlat|1;Dld|1;Pdha1|1;Tpi1|1	8	300	126	53607	http://www.ebi.ac.uk/QuickGO/GTerm?id=GO:0006090	[]
5	5	small molecule catabolic process	GO:0044282	7.06e-07	2.21e-05	0	0	0	0	Dbi|1;Etfdh|1;Aldh5a1|1;Ldha|1;Aldh1l1|1;Gpd2|1;Glud1|1;Got2|1;Mccc1|1;Acat1|1;Tpi1|1	11	682	126	53607	http://www.ebi.ac.uk/QuickGO/GTerm?id=GO:0044282	[]
8	6,7,8	mitochondrial respiratory chain complex assembly	GO:0033108	7.69e-07	2.38e-05	0	0	0	0	Tfam|1;Ndufc2|1;Uqcrb|1;Ndufa5|1;Uqcr10|1;Ndufb4|1	6	132	126	53607	http://www.ebi.ac.uk/QuickGO/GTerm?id=GO:0033108	[]
5	4,5	electron transport chain	GO:0022900	8.96e-07	2.74e-05	0	0	0	0	Etfdh|1;Aldh5a1|1;Ndufc2|1;Sdha|1;Uqcrb|1;Ndufa5|1;Dld|1;Uqcr10|1	8	315	126	53607	http://www.ebi.ac.uk/QuickGO/GTerm?id=GO:0022900	[]
9	8,9	glutamate catabolic process	GO:0006538	1.05e-06	3.2e-05	0	0	0	0	Aldh5a1|1;Glud1|1;Got2|1	3	9	126	53607	http://www.ebi.ac.uk/QuickGO/GTerm?id=GO:0006538	[]
9	8,9	purine ribonucleotide biosynthetic process	GO:0009152	1.14e-06	3.44e-05	0	0	0	0	Atp5j|1;Atp5d|1;Atp5h|1;Ndufc2|1;Atp5f1|1;Atp5o|1;Atp6v0a1|1;Acat1|1;Atp5e|1;Atp5a1|1	10	573	126	53607	http://www.ebi.ac.uk/QuickGO/GTerm?id=GO:0009152	[]
6	5,6	protein complex assembly	GO:0006461	1.56e-06	4.62e-05	0	0	0	0	Ep300|1;Spta1|1;Sept11|1;Tfam|1;Cltc|1;Cyfip1|1;Ptges3|1;Aldh5a1|1;Clybl|1;Ndufc2|1;Sptbn1|1;Uqcrb|1;Ndufa5|1;Anxa5|1;H2afy2|1;Atp6v0a1|1;Uqcr10|1;Anxa6|1;Ndufb4|1;Acat1|1;Hsp90ab1|1;Slc1a2|1;Rac1|1;Calr|1	24	3455	126	53607	http://www.ebi.ac.uk/QuickGO/GTerm?id=GO:0006461	[]
4	4	protein complex biogenesis	GO:0070271	1.57e-06	4.62e-05	0	0	0	0	Ep300|1;Spta1|1;Sept11|1;Tfam|1;Cltc|1;Cyfip1|1;Ptges3|1;Aldh5a1|1;Clybl|1;Ndufc2|1;Sptbn1|1;Uqcrb|1;Ndufa5|1;Anxa5|1;H2afy2|1;Atp6v0a1|1;Uqcr10|1;Anxa6|1;Ndufb4|1;Acat1|1;Hsp90ab1|1;Slc1a2|1;Rac1|1;Calr|1	24	3456	126	53607	http://www.ebi.ac.uk/QuickGO/GTerm?id=GO:0070271	[]
7	7	purine nucleotide biosynthetic process	GO:0006164	1.63e-06	4.74e-05	0	0	0	0	Atp5j|1;Atp5d|1;Atp5h|1;Ndufc2|1;Atp5f1|1;Atp5o|1;Atp6v0a1|1;Acat1|1;Atp5e|1;Atp5a1|1	10	596	126	53607	http://www.ebi.ac.uk/QuickGO/GTerm?id=GO:0006164	[]
5	5	nervous system development	GO:0007399	1.76e-06	5.07e-05	0	0	0	0	Ywhaq|1;Ep300|1;Dbi|1;Atp5j|1;Ywhag|1;Negr1|1;Cyfip1|1;Idh2|1;Rock2|1;Aldh5a1|1;Sdha|1;Gnao1|1;Ppp3ca|1;Glud1|1;Atp5f1|1;Abat|1;Atp2b1|1;Eef2|1;Ywhae|1;H2afy2|1;Syn1|1;Pura|1;Psd3|1;Cnp|1;Acat1|1;Basp1|1;Hsp90ab1|1;Slc1a2|1;Rac1|1;Sh3gl2|1;Epb41l3|1;Slc32a1|1;Calr|1	33	5929	126	53607	http://www.ebi.ac.uk/QuickGO/GTerm?id=GO:0007399	[]
4	4	brain development	GO:0007420	1.82e-06	5.21e-05	0	0	0	0	Ywhaq|1;Dbi|1;Atp5j|1;Gnao1|1;Ppp3ca|1;Glud1|1;Atp5f1|1;Abat|1;Atp2b1|1;Ywhae|1;H2afy2|1;Cnp|1;Acat1|1;Basp1|1;Slc1a2|1;Rac1|1;Slc32a1|1	17	1859	126	53607	http://www.ebi.ac.uk/QuickGO/GTerm?id=GO:0007420	[]
8	7,8	ribonucleotide biosynthetic process	GO:0009260	1.94e-06	5.48e-05	0	0	0	0	Atp5j|1;Atp5d|1;Atp5h|1;Ndufc2|1;Atp5f1|1;Atp5o|1;Atp6v0a1|1;Acat1|1;Atp5e|1;Atp5a1|1	10	608	126	53607	http://www.ebi.ac.uk/QuickGO/GTerm?id=GO:0009260	[]
3	3	cellular localization	GO:0051641	1.96e-06	5.48e-05	0	0	0	0	Ywhaq|1;Ywhaz|1;Ep300|1;Dbi|1;Hnrnpa1|1;Ywhag|1;Hnrnpa2b1|1;Cltc|1;Slc25a3|1;Cyfip1|1;Idh2|1;Rock2|1;Lypla1|1;Ube2o|1;Sptbn1|1;Gnai1|1;Ppp3ca|1;Glud1|1;Abat|1;Atp5o|1;Anxa5|1;Ywhae|1;H2afy2|1;Syn1|1;Cyb5r1|1;Hnrnpm|1;Cnp|1;Sept5|1;Copa|1;Hsp90ab1|1;Rac1|1;Sh3gl2|1;Hspd1|1;Hspa9|1;Amph|1;Epb41l3|1;Slc32a1|1;Vsnl1|1;Calr|1	39	7769	126	53607	http://www.ebi.ac.uk/QuickGO/GTerm?id=GO:0051641	[]
6	6	ribose phosphate biosynthetic process	GO:0046390	2.06e-06	5.71e-05	0	0	0	0	Atp5j|1;Atp5d|1;Atp5h|1;Ndufc2|1;Atp5f1|1;Atp5o|1;Atp6v0a1|1;Acat1|1;Atp5e|1;Atp5a1|1	10	612	126	53607	http://www.ebi.ac.uk/QuickGO/GTerm?id=GO:0046390	[]
5	5	response to organic cyclic compound	GO:0014070	2.15e-06	5.91e-05	0	0	0	0	H2afz|1;Ep300|1;Hnrnpa2b1|1;Rock2|1;Ptges3|1;Gnao1|1;Gnai1|1;Ppp3ca|1;Got2|1;Abat|1;Atp2b1|1;Hba|1;Eef2|1;Acat1|1;Hsp90ab1|1;Ass1|1;Hspd1|1;Calr|1	18	2097	126	53607	http://www.ebi.ac.uk/QuickGO/GTerm?id=GO:0014070	[]
6	6	purine-containing compound biosynthetic process	GO:0072522	2.31e-06	6.29e-05	0	0	0	0	Atp5j|1;Atp5d|1;Atp5h|1;Ndufc2|1;Atp5f1|1;Atp5o|1;Atp6v0a1|1;Acat1|1;Atp5e|1;Atp5a1|1	10	620	126	53607	http://www.ebi.ac.uk/QuickGO/GTerm?id=GO:0072522	[]
4	4	aging	GO:0007568	2.38e-06	6.41e-05	0	0	0	0	Gnao1|1;Abat|1;Atp2b1|1;Eef2|1;Dld|1;Cnp|1;Ass1|1;Slc1a2|1;Slc32a1|1;Calr|1	10	622	126	53607	http://www.ebi.ac.uk/QuickGO/GTerm?id=GO:0007568	[]
4	4	cellular nitrogen compound metabolic process	GO:0034641	2.52e-06	6.74e-05	0	0	0	0	Ywhaq|1;Cbx1|1;Pabpc1|1;H2afz|1;Ep300|1;Dbi|1;Spta1|1;H2afj|1;Hnrnpa1|1;Taldo1|1;Atp5j|1;Hbb-b1|1;Mcee|1;Tfam|1;Hmgn2|1;Hnrnpa2b1|1;Cyfip1|1;Idh2|1;Atp5d|1;Rock2|1;Taf6|1;Ptges3|1;Lrpprc|1;Aldh5a1|1;Ldha|1;Atp5h|1;Ndufc2|1;Aldh1l1|1;Sdha|1;Prdx3|1;Ube2o|1;Gpd2|1;Ppp3ca|1;Uqcrb|1;Atp5f1|1;Abat|1;Atp5o|1;Pdhx|1;Eef2|1;Iba57|1;Eno1|1;Tceal3|1;H2afy2|1;Dlat|1;Pura|1;Atp6v0a1|1;Dld|1;Hnrnpm|1;Cnp|1;Al…	67	17720	126	53607	http://www.ebi.ac.uk/QuickGO/GTerm?id=GO:0034641	[]
6	6	coenzyme biosynthetic process	GO:0009108	2.58e-06	6.83e-05	0	0	0	0	Idh2|1;Pdhx|1;Pdk1|1;Dlat|1;Dld|1;Acat1|1;Pdha1|1	7	254	126	53607	http://www.ebi.ac.uk/QuickGO/GTerm?id=GO:0009108	[]
5	5	nitrogen compound transport	GO:0071705	2.61e-06	6.85e-05	0	0	0	0	Ywhaq|1;Ywhaz|1;Ep300|1;Hnrnpa1|1;Ywhag|1;Hnrnpa2b1|1;Cltc|1;Idh2|1;Lrpprc|1;Lypla1|1;Sptbn1|1;Ppp3ca|1;Glud1|1;Abat|1;Anxa5|1;Ywhae|1;Cyb5r1|1;Hnrnpm|1;Copa|1;Hsp90ab1|1;Slc1a2|1;Hspd1|1;Hspa9|1;Slc12a2|1;Slc32a1|1;Vsnl1|1;Calr|1	27	4346	126	53607	http://www.ebi.ac.uk/QuickGO/GTerm?id=GO:0071705	[]
7	6,7	nucleotide biosynthetic process	GO:0009165	2.91e-06	7.57e-05	0	0	0	0	Atp5j|1;Idh2|1;Atp5d|1;Atp5h|1;Ndufc2|1;Atp5f1|1;Atp5o|1;Atp6v0a1|1;Acat1|1;Atp5e|1;Atp5a1|1	11	790	126	53607	http://www.ebi.ac.uk/QuickGO/GTerm?id=GO:0009165	[]
7	6,7	cellular protein complex assembly	GO:0043623	3.24e-06	8.36e-05	0	0	0	0	Spta1|1;Tfam|1;Cltc|1;Cyfip1|1;Ptges3|1;Ndufc2|1;Sptbn1|1;Uqcrb|1;Ndufa5|1;Atp6v0a1|1;Uqcr10|1;Ndufb4|1;Hsp90ab1|1;Rac1|1;Calr|1	15	1525	126	53607	http://www.ebi.ac.uk/QuickGO/GTerm?id=GO:0043623	[]
6	6	carboxylic acid biosynthetic process	GO:0046394	3.32e-06	8.49e-05	0	0	0	0	Psat1|1;Cltc|1;Ptges3|1;Ldha|1;Decr2|1;Glud1|1;Got2|1;Abat|1;Ass1|1;Fam213b|1	10	646	126	53607	http://www.ebi.ac.uk/QuickGO/GTerm?id=GO:0046394	[]
6	5,6	nucleoside phosphate biosynthetic process	GO:1901293	3.4e-06	8.61e-05	0	0	0	0	Atp5j|1;Idh2|1;Atp5d|1;Atp5h|1;Ndufc2|1;Atp5f1|1;Atp5o|1;Atp6v0a1|1;Acat1|1;Atp5e|1;Atp5a1|1	11	803	126	53607	http://www.ebi.ac.uk/QuickGO/GTerm?id=GO:1901293	[]
5	5	organic acid biosynthetic process	GO:0016053	3.5e-06	8.81e-05	0	0	0	0	Psat1|1;Cltc|1;Ptges3|1;Ldha|1;Decr2|1;Glud1|1;Got2|1;Abat|1;Ass1|1;Fam213b|1	10	650	126	53607	http://www.ebi.ac.uk/QuickGO/GTerm?id=GO:0016053	[]
8	8	succinate metabolic process	GO:0006105	3.56e-06	8.88e-05	0	0	0	0	Aldh5a1|1;Sdha|1;Sucla2|1	3	13	126	53607	http://www.ebi.ac.uk/QuickGO/GTerm?id=GO:0006105	[]
6	6	cation transport	GO:0006812	3.75e-06	9.27e-05	0	0	0	0	Ywhaz|1;Dbi|1;Atp5j|1;Cltc|1;Atp5d|1;Atp5h|1;Gnao1|1;Ppp3ca|1;Uqcrb|1;Atp5f1|1;Abat|1;Atp5o|1;Atp2b1|1;Ywhae|1;Atp6v0a1|1;Uqcr10|1;Anxa6|1;Atp5e|1;Atp5a1|1;Slc12a2|1;Slc32a1|1	21	2883	126	53607	http://www.ebi.ac.uk/QuickGO/GTerm?id=GO:0006812	[]
6	6	cellular macromolecular complex assembly	GO:0034622	3.89e-06	9.45e-05	0	0	0	0	Ep300|1;Spta1|1;Tfam|1;Cltc|1;H3f3c|1;Cyfip1|1;Ptges3|1;Ndufc2|1;Sptbn1|1;Uqcrb|1;Ndufa5|1;H2afy2|1;Atp6v0a1|1;Uqcr10|1;Ndufb4|1;Hsp90ab1|1;Rac1|1;Sh3gl2|1;Calr|1	19	2416	126	53607	http://www.ebi.ac.uk/QuickGO/GTerm?id=GO:0034622	[]
5	5	central nervous system development	GO:0007417	3.89e-06	9.45e-05	0	0	0	0	Ywhaq|1;Dbi|1;Atp5j|1;Aldh5a1|1;Gnao1|1;Ppp3ca|1;Glud1|1;Atp5f1|1;Abat|1;Atp2b1|1;Ywhae|1;H2afy2|1;Cnp|1;Acat1|1;Basp1|1;Hsp90ab1|1;Slc1a2|1;Rac1|1;Slc32a1|1	19	2416	126	53607	http://www.ebi.ac.uk/QuickGO/GTerm?id=GO:0007417	[]
5	5	small molecule biosynthetic process	GO:0044283	4e-06	9.64e-05	0	0	0	0	Psat1|1;Cltc|1;Ptges3|1;Ldha|1;Decr2|1;Gpd2|1;Glud1|1;Got2|1;Abat|1;Cyb5r1|1;Ass1|1;Tpi1|1;Fam213b|1	13	1165	126	53607	http://www.ebi.ac.uk/QuickGO/GTerm?id=GO:0044283	[]
4	4	response to drug	GO:0042493	4.49e-06	0.000107	0	0	0	0	Ywhaz|1;Ep300|1;Gnao1|1;Ppp3ca|1;Abat|1;Eef2|1;Top1|1;Hsp90ab1|1;Slc1a2|1;Hspd1|1;Calr|1	11	827	126	53607	http://www.ebi.ac.uk/QuickGO/GTerm?id=GO:0042493	[]
4	4	head development	GO:0060322	4.63e-06	0.00011	0	0	0	0	Ywhaq|1;Dbi|1;Atp5j|1;Gnao1|1;Ppp3ca|1;Glud1|1;Atp5f1|1;Abat|1;Atp2b1|1;Ywhae|1;H2afy2|1;Cnp|1;Acat1|1;Basp1|1;Slc1a2|1;Rac1|1;Slc32a1|1	17	1994	126	53607	http://www.ebi.ac.uk/QuickGO/GTerm?id=GO:0060322	[]
6	3,5,6	positive regulation of establishment of protein localization	GO:1904951	4.75e-06	0.000112	0	0	0	0	Ep300|1;Sptbn1|1;Ppp3ca|1;Glud1|1;Abat|1;Ywhae|1;Cyb5r1|1;Hnrnpm|1;Hsp90ab1|1;Hspd1|1;Vsnl1|1	11	832	126	53607	http://www.ebi.ac.uk/QuickGO/GTerm?id=GO:1904951	[]
5	5	macromolecular complex assembly	GO:0065003	4.88e-06	0.000114	0	0	0	0	Ep300|1;Spta1|1;Sept11|1;Tfam|1;Cltc|1;H3f3c|1;Cyfip1|1;Ptges3|1;Aldh5a1|1;Clybl|1;Ndufc2|1;Sptbn1|1;Uqcrb|1;Ndufa5|1;Anxa5|1;H2afy2|1;Atp6v0a1|1;Uqcr10|1;Anxa6|1;Ndufb4|1;Acat1|1;Hsp90ab1|1;Slc1a2|1;Rac1|1;Sh3gl2|1;Calr|1	26	4222	126	53607	http://www.ebi.ac.uk/QuickGO/GTerm?id=GO:0065003	[]
8	6,8	alpha-amino acid catabolic process	GO:1901606	5.79e-06	0.000134	0	0	0	0	Aldh5a1|1;Aldh1l1|1;Glud1|1;Got2|1;Mccc1|1;Acat1|1	6	187	126	53607	http://www.ebi.ac.uk/QuickGO/GTerm?id=GO:1901606	[]
3	3	biosynthetic process	GO:0009058	6.08e-06	0.00014	0	0	0	0	Ywhaq|1;Cbx1|1;H2afz|1;Ep300|1;Dbi|1;Spta1|1;H2afj|1;Atp5j|1;Hbb-b1|1;Tfam|1;Hmgn2|1;Hnrnpa2b1|1;Psat1|1;Cltc|1;Cyfip1|1;Idh2|1;Atp5d|1;Taf6|1;Ptges3|1;Lrpprc|1;Ldha|1;Atp5h|1;Ndufc2|1;Aldh1l1|1;Prdx3|1;Ube2o|1;Decr2|1;Gpd2|1;Ppp3ca|1;Glud1|1;Atp5f1|1;Got2|1;Abat|1;Atp5o|1;Pdhx|1;Eef2|1;Pdk1|1;Sptlc3|1;Iba57|1;Eno1|1;Tceal3|1;H2afy2|1;Dlat|1;Pura|1;Atp6v0a1|1;Dld|1;Cyb5r1|1;Aldh7a1|1;Top1|1;Acat1…	62	16200	126	53607	http://www.ebi.ac.uk/QuickGO/GTerm?id=GO:0009058	[]
8	8	oxaloacetate metabolic process	GO:0006107	8.42e-06	0.000192	0	0	0	0	Got2|1;Cs|1;Mdh1|1	3	17	126	53607	http://www.ebi.ac.uk/QuickGO/GTerm?id=GO:0006107	[]
4	4	multicellular organism development	GO:0007275	8.62e-06	0.000195	0	0	0	0	Ywhaq|1;H2afz|1;Ep300|1;Dbi|1;Spta1|1;Atp5j|1;Ywhag|1;Hbb-b1|1;Afp|1;Negr1|1;Cyfip1|1;Idh2|1;Rock2|1;Aco2|1;Ptges3|1;Aldh5a1|1;Sdha|1;Prdx3|1;Gnao1|1;Gpd2|1;Ppp3ca|1;Glud1|1;Atp5f1|1;Got2|1;Abat|1;Atp2b1|1;Hba|1;Eef2|1;Ywhae|1;Eno1|1;H2afy2|1;Syn1|1;Pura|1;Dld|1;Psd3|1;Cnp|1;Top1|1;Acat1|1;Basp1|1;Hsp90ab1|1;Ass1|1;Slc1a2|1;Rac1|1;Sh3gl2|1;Hspd1|1;Hspa9|1;Slc12a2|1;Epb41l3|1;Calb1|1;Tpi1|1;Slc32a…	52	12670	126	53607	http://www.ebi.ac.uk/QuickGO/GTerm?id=GO:0007275	[]
4	4	single-organism catabolic process	GO:0044712	8.81e-06	0.000198	0	0	0	0	Dbi|1;Etfdh|1;Aldh5a1|1;Ldha|1;Aldh1l1|1;Prdx3|1;Gpd2|1;Glud1|1;Got2|1;Anxa5|1;Pdk1|1;Eno1|1;Pygb|1;Mccc1|1;Cnp|1;Acat1|1;Pdha1|1;Tpi1|1;Mdh1|1	19	2559	126	53607	http://www.ebi.ac.uk/QuickGO/GTerm?id=GO:0044712	[]
7	5,7	cellular amino acid catabolic process	GO:0009063	1.31e-05	0.000293	0	0	0	0	Aldh5a1|1;Aldh1l1|1;Glud1|1;Got2|1;Mccc1|1;Acat1|1	6	216	126	53607	http://www.ebi.ac.uk/QuickGO/GTerm?id=GO:0009063	[]
5	5	ion transport	GO:0006811	1.39e-05	0.000307	0	0	0	0	Ywhaq|1;Ywhaz|1;Dbi|1;Atp5j|1;Cltc|1;Slc25a3|1;Atp5d|1;Atp5h|1;Gnao1|1;Ppp3ca|1;Uqcrb|1;Atp5f1|1;Got2|1;Abat|1;Atp5o|1;Atp2b1|1;Ywhae|1;Atp6v0a1|1;Uqcr10|1;Anxa6|1;Atp5e|1;Atp5a1|1;Slc1a2|1;Slc12a2|1;Slc32a1|1	25	4202	126	53607	http://www.ebi.ac.uk/QuickGO/GTerm?id=GO:0006811	[]
4	4	response to inorganic substance	GO:0010035	1.45e-05	0.000317	0	0	0	0	Ep300|1;Hnrnpa1|1;Prdx3|1;Gnao1|1;Ppp3ca|1;Glud1|1;Abat|1;Eef2|1;Anxa5|1;Ass1|1;Hspd1|1;Calr|1	12	1121	126	53607	http://www.ebi.ac.uk/QuickGO/GTerm?id=GO:0010035	[]
6	6	carboxylic acid catabolic process	GO:0046395	1.48e-05	0.00032	0	0	0	0	Dbi|1;Etfdh|1;Aldh5a1|1;Aldh1l1|1;Glud1|1;Got2|1;Mccc1|1;Acat1|1	8	462	126	53607	http://www.ebi.ac.uk/QuickGO/GTerm?id=GO:0046395	[]
5	5	organic acid catabolic process	GO:0016054	1.48e-05	0.00032	0	0	0	0	Dbi|1;Etfdh|1;Aldh5a1|1;Aldh1l1|1;Glud1|1;Got2|1;Mccc1|1;Acat1|1	8	462	126	53607	http://www.ebi.ac.uk/QuickGO/GTerm?id=GO:0016054	[]
4	4	establishment of localization in cell	GO:0051649	1.55e-05	0.000334	0	0	0	0	Ywhaq|1;Ywhaz|1;Ep300|1;Dbi|1;Hnrnpa1|1;Ywhag|1;Hnrnpa2b1|1;Cltc|1;Slc25a3|1;Cyfip1|1;Lypla1|1;Ube2o|1;Sptbn1|1;Ppp3ca|1;Glud1|1;Abat|1;Atp5o|1;Ywhae|1;Syn1|1;Cyb5r1|1;Cnp|1;Sept5|1;Copa|1;Hsp90ab1|1;Sh3gl2|1;Hspd1|1;Hspa9|1;Amph|1;Slc32a1|1;Vsnl1|1;Calr|1	31	5958	126	53607	http://www.ebi.ac.uk/QuickGO/GTerm?id=GO:0051649	[]
5	5	protein complex subunit organization	GO:0071822	1.62e-05	0.000346	0	0	0	0	Ep300|1;Spta1|1;Sept11|1;Tfam|1;Cltc|1;Cyfip1|1;Ptges3|1;Aldh5a1|1;Clybl|1;Ndufc2|1;Sptbn1|1;Uqcrb|1;Ndufa5|1;Anxa5|1;H2afy2|1;Atp6v0a1|1;Uqcr10|1;Anxa6|1;Ndufb4|1;Acat1|1;Hsp90ab1|1;Slc1a2|1;Rac1|1;Sh3gl2|1;Calr|1	25	4241	126	53607	http://www.ebi.ac.uk/QuickGO/GTerm?id=GO:0071822	[]
7	5,6,7	positive regulation of connective tissue replacement	GO:1905205	1.64e-05	0.000347	0	0	0	0	Rock2|1;Ppp3ca|1	2	3	126	53607	http://www.ebi.ac.uk/QuickGO/GTerm?id=GO:1905205	[]
5	5	fatty acid metabolic process	GO:0006631	1.94e-05	0.000407	0	0	0	0	Dbi|1;Etfdh|1;Ptges3|1;Lypla1|1;Aldh5a1|1;Decr2|1;Pdk1|1;Dld|1;Acat1|1;Fam213b|1	10	792	126	53607	http://www.ebi.ac.uk/QuickGO/GTerm?id=GO:0006631	[]
3	3	organic substance metabolic process	GO:0071704	2.02e-05	0.000422	0	0	0	0	Ywhaq|1;Cbx1|1;Pabpc1|1;H2afz|1;Ep300|1;Dbi|1;Spta1|1;H2afj|1;Hnrnpa1|1;Taldo1|1;Atp5j|1;Hbb-b1|1;Mcee|1;Afp|1;Tfam|1;Hmgn2|1;Hnrnpa2b1|1;Psat1|1;Cltc|1;Cyfip1|1;Jade3|1;Etfdh|1;Idh2|1;Atp5d|1;Rock2|1;Taf6|1;Aco2|1;Ppa2|1;Ptges3|1;Lrpprc|1;Lypla1|1;Aldh5a1|1;Ldha|1;Atp5h|1;Acot9|1;Ndufc2|1;Aldh1l1|1;Sdha|1;Prdx3|1;Ube2o|1;Decr2|1;Sptbn1|1;Gpd2|1;Sucla2|1;Ppp3ca|1;Uqcrb|1;Hspa4l|1;Glud1|1;Atp5f1|1…	93	29862	126	53607	http://www.ebi.ac.uk/QuickGO/GTerm?id=GO:0071704	[]
2	2	localization	GO:0051179	2.14e-05	0.000444	0	0	0	0	Ywhaq|1;Ywhaz|1;Ep300|1;Dbi|1;Hnrnpa1|1;Atp5j|1;Ywhag|1;Hbb-b1|1;Afp|1;Hnrnpa2b1|1;Cltc|1;Slc25a3|1;Cyfip1|1;Idh2|1;Atp5d|1;Rock2|1;Lrpprc|1;Lypla1|1;Atp5h|1;Gnao1|1;Ube2o|1;Sptbn1|1;Gnai1|1;Ppp3ca|1;Uqcrb|1;Glud1|1;Atp5f1|1;Got2|1;Abat|1;Atp5o|1;Atp2b1|1;Hba|1;Anxa5|1;Ywhae|1;H2afy2|1;Syn1|1;Atp6v0a1|1;Cyb5r1|1;Psd3|1;Hnrnpm|1;Cnp|1;Uqcr10|1;Anxa6|1;Sept5|1;Copa|1;Atp5e|1;Hsp90ab1|1;Atp5a1|1;Slc…	59	15654	126	53607	http://www.ebi.ac.uk/QuickGO/GTerm?id=GO:0051179	[]
4	4	system development	GO:0048731	3.3e-05	0.000678	0	0	0	0	Ywhaq|1;Ep300|1;Dbi|1;Spta1|1;Atp5j|1;Ywhag|1;Hbb-b1|1;Afp|1;Negr1|1;Cyfip1|1;Idh2|1;Rock2|1;Aco2|1;Ptges3|1;Aldh5a1|1;Sdha|1;Prdx3|1;Gnao1|1;Gpd2|1;Ppp3ca|1;Glud1|1;Atp5f1|1;Got2|1;Abat|1;Atp2b1|1;Hba|1;Eef2|1;Ywhae|1;H2afy2|1;Syn1|1;Pura|1;Psd3|1;Cnp|1;Acat1|1;Basp1|1;Hsp90ab1|1;Ass1|1;Slc1a2|1;Rac1|1;Sh3gl2|1;Hspd1|1;Hspa9|1;Slc12a2|1;Epb41l3|1;Calb1|1;Slc32a1|1;Calr|1	47	11471	126	53607	http://www.ebi.ac.uk/QuickGO/GTerm?id=GO:0048731	[]
5	5	response to ammonium ion	GO:0060359	3.49e-05	0.000712	0	0	0	0	Gnao1|1;Got2|1;Abat|1;Hsp90ab1|1;Ass1|1;Hspd1|1	6	257	126	53607	http://www.ebi.ac.uk/QuickGO/GTerm?id=GO:0060359	[]
3	3	regulation of biological quality	GO:0065008	3.71e-05	0.000752	0	0	0	0	Ywhaz|1;Ep300|1;Dbi|1;Spta1|1;Ywhag|1;Hbb-b1|1;Afp|1;Hnrnpa2b1|1;Cyfip1|1;Ppa2|1;Ptges3|1;Aldh5a1|1;Immt|1;Ndufc2|1;Prdx3|1;Sptbn1|1;Ppp3ca|1;Glud1|1;Got2|1;Abat|1;Atp2b1|1;Hba|1;Anxa5|1;Ywhae|1;Syn1|1;Atp6v0a1|1;Dld|1;Cnp|1;Anxa6|1;Copa|1;Hsp90ab1|1;Rac1|1;Hspd1|1;Hspa9|1;Slc12a2|1;Epb41l3|1;Calb1|1;Vsnl1|1;Calr|1	39	8785	126	53607	http://www.ebi.ac.uk/QuickGO/GTerm?id=GO:0065008	[]
4	4	organic substance biosynthetic process	GO:1901576	3.75e-05	0.000756	0	0	0	0	Ywhaq|1;Cbx1|1;H2afz|1;Ep300|1;Dbi|1;Spta1|1;H2afj|1;Atp5j|1;Hbb-b1|1;Tfam|1;Hmgn2|1;Hnrnpa2b1|1;Psat1|1;Cltc|1;Cyfip1|1;Idh2|1;Atp5d|1;Taf6|1;Ptges3|1;Lrpprc|1;Ldha|1;Atp5h|1;Ndufc2|1;Prdx3|1;Ube2o|1;Decr2|1;Gpd2|1;Ppp3ca|1;Glud1|1;Atp5f1|1;Got2|1;Abat|1;Atp5o|1;Pdhx|1;Eef2|1;Pdk1|1;Sptlc3|1;Iba57|1;Eno1|1;Tceal3|1;H2afy2|1;Dlat|1;Pura|1;Atp6v0a1|1;Dld|1;Cyb5r1|1;Aldh7a1|1;Top1|1;Acat1|1;Basp1|1…	59	15928	126	53607	http://www.ebi.ac.uk/QuickGO/GTerm?id=GO:1901576	[]
7	6,7	inorganic ion transmembrane transport	GO:0098660	3.98e-05	0.000796	0	0	0	0	Dbi|1;Atp5j|1;Slc25a3|1;Atp5d|1;Atp5h|1;Uqcrb|1;Atp5f1|1;Atp5o|1;Atp2b1|1;Ywhae|1;Atp6v0a1|1;Uqcr10|1;Atp5e|1;Atp5a1|1;Slc12a2|1	15	1889	126	53607	http://www.ebi.ac.uk/QuickGO/GTerm?id=GO:0098660	[]
7	4,6,7	positive regulation of protein transport	GO:0051222	4.09e-05	0.000813	0	0	0	0	Ep300|1;Sptbn1|1;Ppp3ca|1;Glud1|1;Abat|1;Ywhae|1;Cyb5r1|1;Hnrnpm|1;Hsp90ab1|1;Hspd1|1;Vsnl1|1	11	1051	126	53607	http://www.ebi.ac.uk/QuickGO/GTerm?id=GO:0051222	[]
6	5,6	single-organism intracellular transport	GO:1902582	4.21e-05	0.00083	0	0	0	0	Ywhaq|1;Ywhaz|1;Ep300|1;Dbi|1;Ywhag|1;Hnrnpa2b1|1;Cyfip1|1;Lypla1|1;Ube2o|1;Sptbn1|1;Ppp3ca|1;Atp5o|1;Ywhae|1;Cyb5r1|1;Cnp|1;Hsp90ab1|1;Sh3gl2|1;Hspd1|1;Hspa9|1;Amph|1;Calr|1	21	3388	126	53607	http://www.ebi.ac.uk/QuickGO/GTerm?id=GO:1902582	[]
5	5	alpha-amino acid metabolic process	GO:1901605	4.83e-05	0.000947	0	0	0	0	Psat1|1;Aldh5a1|1;Aldh1l1|1;Glud1|1;Got2|1;Mccc1|1;Acat1|1;Ass1|1	8	546	126	53607	http://www.ebi.ac.uk/QuickGO/GTerm?id=GO:1901605	[]
5	5	sulfur compound biosynthetic process	GO:0044272	4.88e-05	0.00095	0	0	0	0	Pdhx|1;Pdk1|1;Dlat|1;Dld|1;Acat1|1;Pdha1|1	6	273	126	53607	http://www.ebi.ac.uk/QuickGO/GTerm?id=GO:0044272	[]
8	7,8	inorganic cation transmembrane transport	GO:0098662	4.99e-05	0.000964	0	0	0	0	Dbi|1;Atp5j|1;Atp5d|1;Atp5h|1;Uqcrb|1;Atp5f1|1;Atp5o|1;Atp2b1|1;Ywhae|1;Atp6v0a1|1;Uqcr10|1;Atp5e|1;Atp5a1|1;Slc12a2|1	14	1701	126	53607	http://www.ebi.ac.uk/QuickGO/GTerm?id=GO:0098662	[]
5	5	response to alcohol	GO:0097305	5.01e-05	0.000964	0	0	0	0	H2afz|1;Ep300|1;Rock2|1;Got2|1;Abat|1;Atp2b1|1;Eef2|1;Ass1|1;Calr|1	9	711	126	53607	http://www.ebi.ac.uk/QuickGO/GTerm?id=GO:0097305	[]
5	4,5	intracellular transport	GO:0046907	5.23e-05	0.000999	0	0	0	0	Ywhaq|1;Ywhaz|1;Ep300|1;Dbi|1;Hnrnpa1|1;Ywhag|1;Hnrnpa2b1|1;Cltc|1;Slc25a3|1;Cyfip1|1;Lypla1|1;Ube2o|1;Sptbn1|1;Ppp3ca|1;Atp5o|1;Ywhae|1;Cyb5r1|1;Cnp|1;Copa|1;Hsp90ab1|1;Sh3gl2|1;Hspd1|1;Hspa9|1;Amph|1;Calr|1	25	4551	126	53607	http://www.ebi.ac.uk/QuickGO/GTerm?id=GO:0046907	[]
8	8	2-oxoglutarate metabolic process	GO:0006103	5.43e-05	0.00102	0	0	0	0	Idh2|1;Got2|1;Dld|1	3	31	126	53607	http://www.ebi.ac.uk/QuickGO/GTerm?id=GO:0006103	[]
6	5,6	regulation of connective tissue replacement	GO:1905203	5.46e-05	0.00102	0	0	0	0	Rock2|1;Ppp3ca|1	2	5	126	53607	http://www.ebi.ac.uk/QuickGO/GTerm?id=GO:1905203	[]
7	6,7	glycerol catabolic process	GO:0019563	5.46e-05	0.00102	0	0	0	0	Gpd2|1;Tpi1|1	2	5	126	53607	http://www.ebi.ac.uk/QuickGO/GTerm?id=GO:0019563	[]
4	4	response to oxygen-containing compound	GO:1901700	5.86e-05	0.00109	0	0	0	0	H2afz|1;Ep300|1;Ywhag|1;Cyfip1|1;Rock2|1;Prdx3|1;Gnao1|1;Gnai1|1;Ppp3ca|1;Got2|1;Abat|1;Atp2b1|1;Eef2|1;Anxa5|1;Cnp|1;Hsp90ab1|1;Ass1|1;Slc1a2|1;Hspd1|1;Vsnl1|1;Calr|1	21	3467	126	53607	http://www.ebi.ac.uk/QuickGO/GTerm?id=GO:1901700	[]
3	3	single-multicellular organism process	GO:0044707	6e-05	0.00111	0	0	0	0	Ywhaq|1;Ywhaz|1;H2afz|1;Ep300|1;Dbi|1;Spta1|1;Atp5j|1;Ywhag|1;Hbb-b1|1;Afp|1;Cltc|1;Negr1|1;Cyfip1|1;Idh2|1;Rock2|1;Aco2|1;Ptges3|1;Aldh5a1|1;Sdha|1;Prdx3|1;Gnao1|1;Sptbn1|1;Gpd2|1;Ppp3ca|1;Glud1|1;Atp5f1|1;Got2|1;Abat|1;Atp2b1|1;Hba|1;Eef2|1;Anxa5|1;Ywhae|1;Eno1|1;H2afy2|1;Dlat|1;Syn1|1;Pura|1;Dld|1;Psd3|1;Cnp|1;Top1|1;Anxa6|1;Acat1|1;Basp1|1;Copa|1;Hsp90ab1|1;Ass1|1;Atp5a1|1;Slc1a2|1;Rac1|1;Sh3…	61	16936	126	53607	http://www.ebi.ac.uk/QuickGO/GTerm?id=GO:0044707	[]
2	2	single-organism process	GO:0044699	6.11e-05	0.00112	0	0	0	0	Ywhaq|1;Ywhaz|1;Pabpc1|1;H2afz|1;Ep300|1;Dbi|1;Spta1|1;H2afj|1;Taldo1|1;Atp5j|1;Sept11|1;Ywhag|1;Hbb-b1|1;Mcee|1;Afp|1;Tfam|1;Hnrnpa2b1|1;Psat1|1;Cltc|1;Negr1|1;Slc25a3|1;Cyfip1|1;Jade3|1;Etfdh|1;Idh2|1;Atp5d|1;Rock2|1;Taf6|1;Aco2|1;Ptges3|1;Lrpprc|1;Lypla1|1;Aldh5a1|1;Immt|1;Ldha|1;Atp5h|1;Dnajc5|1;Ndufc2|1;Aldh1l1|1;Sdha|1;Prdx3|1;Gnao1|1;Ube2o|1;Decr2|1;Sptbn1|1;Gpd2|1;Sucla2|1;Gnai1|1;Ppp3ca|…	111	39506	126	53607	http://www.ebi.ac.uk/QuickGO/GTerm?id=GO:0044699	[]
4	4	organic cyclic compound metabolic process	GO:1901360	6.19e-05	0.00113	0	0	0	0	Ywhaq|1;Cbx1|1;Pabpc1|1;H2afz|1;Ep300|1;Spta1|1;H2afj|1;Hnrnpa1|1;Taldo1|1;Atp5j|1;Mcee|1;Afp|1;Tfam|1;Hmgn2|1;Hnrnpa2b1|1;Idh2|1;Atp5d|1;Taf6|1;Ptges3|1;Lrpprc|1;Ldha|1;Atp5h|1;Ndufc2|1;Aldh1l1|1;Sdha|1;Prdx3|1;Ube2o|1;Gpd2|1;Ppp3ca|1;Uqcrb|1;Atp5f1|1;Got2|1;Abat|1;Atp5o|1;Pdhx|1;Iba57|1;Eno1|1;Tceal3|1;H2afy2|1;Dlat|1;Pura|1;Atp6v0a1|1;Dld|1;Cyb5r1|1;Hnrnpm|1;Cnp|1;Uqcr10|1;Top1|1;Acat1|1;Basp1…	60	16566	126	53607	http://www.ebi.ac.uk/QuickGO/GTerm?id=GO:1901360	[]
7	6,7	peptide transport	GO:0015833	6.36e-05	0.00115	0	0	0	0	Ywhaq|1;Ywhaz|1;Ep300|1;Ywhag|1;Cltc|1;Idh2|1;Lypla1|1;Sptbn1|1;Ppp3ca|1;Glud1|1;Abat|1;Anxa5|1;Ywhae|1;Cyb5r1|1;Hnrnpm|1;Copa|1;Hsp90ab1|1;Hspd1|1;Hspa9|1;Vsnl1|1;Calr|1	21	3487	126	53607	http://www.ebi.ac.uk/QuickGO/GTerm?id=GO:0015833	[]
5	5	organophosphate biosynthetic process	GO:0090407	6.95e-05	0.00125	0	0	0	0	Atp5j|1;Idh2|1;Atp5d|1;Atp5h|1;Ndufc2|1;Atp5f1|1;Atp5o|1;Atp6v0a1|1;Acat1|1;Atp5e|1;Atp5a1|1;Tpi1|1	12	1319	126	53607	http://www.ebi.ac.uk/QuickGO/GTerm?id=GO:0090407	[]
6	6	cellular response to ketone	GO:1901655	7.48e-05	0.00134	0	0	0	0	Ep300|1;Rock2|1;Gnai1|1;Atp2b1|1;Ass1|1	5	182	126	53607	http://www.ebi.ac.uk/QuickGO/GTerm?id=GO:1901655	[]
4	4	regulation of cellular localization	GO:0060341	7.77e-05	0.00139	0	0	0	0	Ep300|1;Dbi|1;Cltc|1;Cyfip1|1;Idh2|1;Rock2|1;Lypla1|1;Sptbn1|1;Gnai1|1;Ppp3ca|1;Glud1|1;Abat|1;Anxa5|1;Ywhae|1;Cyb5r1|1;Hnrnpm|1;Sept5|1;Hsp90ab1|1;Hspd1|1;Vsnl1|1	20	3267	126	53607	http://www.ebi.ac.uk/QuickGO/GTerm?id=GO:0060341	[]
4	4	regulation of protein localization	GO:0032880	7.89e-05	0.0014	0	0	0	0	Ep300|1;Cltc|1;Idh2|1;Rock2|1;Lypla1|1;Sptbn1|1;Gnai1|1;Ppp3ca|1;Glud1|1;Abat|1;Anxa5|1;Ywhae|1;Cyb5r1|1;Hnrnpm|1;Hsp90ab1|1;Hspd1|1;Vsnl1|1	17	2494	126	53607	http://www.ebi.ac.uk/QuickGO/GTerm?id=GO:0032880	[]
6	5,6	ion transmembrane transport	GO:0034220	7.93e-05	0.0014	0	0	0	0	Ywhaq|1;Dbi|1;Atp5j|1;Slc25a3|1;Atp5d|1;Atp5h|1;Uqcrb|1;Atp5f1|1;Atp5o|1;Atp2b1|1;Ywhae|1;Atp6v0a1|1;Uqcr10|1;Anxa6|1;Atp5e|1;Atp5a1|1;Slc1a2|1;Slc12a2|1	18	2748	126	53607	http://www.ebi.ac.uk/QuickGO/GTerm?id=GO:0034220	[]
6	6	amide transport	GO:0042886	8e-05	0.0014	0	0	0	0	Ywhaq|1;Ywhaz|1;Ep300|1;Ywhag|1;Cltc|1;Idh2|1;Lypla1|1;Sptbn1|1;Ppp3ca|1;Glud1|1;Abat|1;Anxa5|1;Ywhae|1;Cyb5r1|1;Hnrnpm|1;Copa|1;Hsp90ab1|1;Hspd1|1;Hspa9|1;Vsnl1|1;Calr|1	21	3544	126	53607	http://www.ebi.ac.uk/QuickGO/GTerm?id=GO:0042886	[]
3	3	response to endogenous stimulus	GO:0009719	8.06e-05	0.0014	0	0	0	0	H2afz|1;Ep300|1;Ywhag|1;Cyfip1|1;Rock2|1;Ptges3|1;Gnao1|1;Ube2o|1;Ppp3ca|1;Got2|1;Abat|1;Atp2b1|1;Eef2|1;Anxa5|1;Acat1|1;Hsp90ab1|1;Ass1|1;Slc1a2|1;Sh3gl2|1;Hspd1|1;Calr|1	21	3546	126	53607	http://www.ebi.ac.uk/QuickGO/GTerm?id=GO:0009719	[]
6	5,6	alditol catabolic process	GO:0019405	8.17e-05	0.00141	0	0	0	0	Gpd2|1;Tpi1|1	2	6	126	53607	http://www.ebi.ac.uk/QuickGO/GTerm?id=GO:0019405	[]
7	5,6,7	regulation of protein transport	GO:0051223	8.23e-05	0.00141	0	0	0	0	Ep300|1;Idh2|1;Lypla1|1;Sptbn1|1;Ppp3ca|1;Glud1|1;Abat|1;Anxa5|1;Ywhae|1;Cyb5r1|1;Hnrnpm|1;Hsp90ab1|1;Hspd1|1;Vsnl1|1	14	1783	126	53607	http://www.ebi.ac.uk/QuickGO/GTerm?id=GO:0051223	[]
4	4	cellular component assembly	GO:0022607	8.29e-05	0.00142	0	0	0	0	Ywhaz|1;Ep300|1;Spta1|1;Sept11|1;Tfam|1;Cltc|1;H3f3c|1;Cyfip1|1;Rock2|1;Ptges3|1;Aldh5a1|1;Clybl|1;Ndufc2|1;Sptbn1|1;Uqcrb|1;Ndufa5|1;Anxa5|1;Iba57|1;H2afy2|1;Atp6v0a1|1;Uqcr10|1;Anxa6|1;Ndufb4|1;Acat1|1;Hsp90ab1|1;Slc1a2|1;Rac1|1;Sh3gl2|1;Hspa9|1;Epb41l3|1;Calr|1	31	6499	126	53607	http://www.ebi.ac.uk/QuickGO/GTerm?id=GO:0022607	[]
6	5,6	regulation of cellular amide metabolic process	GO:0034248	8.46e-05	0.00144	0	0	0	0	Ep300|1;Hbb-b1|1;Hnrnpa2b1|1;Cyfip1|1;Rock2|1;Lrpprc|1;Ppp3ca|1;Eef2|1;Pura|1;Calr|1	10	945	126	53607	http://www.ebi.ac.uk/QuickGO/GTerm?id=GO:0034248	[]
5	5	response to organonitrogen compound	GO:0010243	8.71e-05	0.00147	0	0	0	0	H2afz|1;Ep300|1;Ywhag|1;Cyfip1|1;Rock2|1;Gnao1|1;Ppp3ca|1;Got2|1;Abat|1;Eef2|1;Anxa5|1;Hsp90ab1|1;Ass1|1;Slc1a2|1;Hspd1|1	15	2026	126	53607	http://www.ebi.ac.uk/QuickGO/GTerm?id=GO:0010243	[]
7	7	glucose metabolic process	GO:0006006	8.85e-05	0.00149	0	0	0	0	Aldh5a1|1;Ldha|1;Gpd2|1;Pdk1|1;Dlat|1;Pdha1|1;Tpi1|1	7	441	126	53607	http://www.ebi.ac.uk/QuickGO/GTerm?id=GO:0006006	[]
8	7,8	mitochondrial ATP synthesis coupled electron transport	GO:0042775	9.16e-05	0.00153	0	0	0	0	Ndufc2|1;Sdha|1;Uqcrb|1;Dld|1;Uqcr10|1	5	190	126	53607	http://www.ebi.ac.uk/QuickGO/GTerm?id=GO:0042775	[]
4	4	cellular biosynthetic process	GO:0044249	9.67e-05	0.00161	0	0	0	0	Ywhaq|1;Cbx1|1;H2afz|1;Ep300|1;Spta1|1;H2afj|1;Atp5j|1;Hbb-b1|1;Tfam|1;Hmgn2|1;Hnrnpa2b1|1;Psat1|1;Cltc|1;Cyfip1|1;Idh2|1;Atp5d|1;Taf6|1;Ptges3|1;Lrpprc|1;Ldha|1;Atp5h|1;Ndufc2|1;Prdx3|1;Ube2o|1;Decr2|1;Ppp3ca|1;Glud1|1;Atp5f1|1;Got2|1;Abat|1;Atp5o|1;Pdhx|1;Eef2|1;Pdk1|1;Sptlc3|1;Iba57|1;Eno1|1;Tceal3|1;H2afy2|1;Dlat|1;Pura|1;Atp6v0a1|1;Dld|1;Aldh7a1|1;Top1|1;Acat1|1;Basp1|1;Atp5e|1;Hsp90ab1|1;As…	57	15651	126	53607	http://www.ebi.ac.uk/QuickGO/GTerm?id=GO:0044249	[]
6	6	cellular response to organic cyclic compound	GO:0071407	0.000107	0.00176	0	0	0	0	H2afz|1;Ep300|1;Hnrnpa2b1|1;Rock2|1;Ptges3|1;Gnai1|1;Ppp3ca|1;Atp2b1|1;Hsp90ab1|1;Ass1|1;Calr|1	11	1171	126	53607	http://www.ebi.ac.uk/QuickGO/GTerm?id=GO:0071407	[]
4	4	cellular aromatic compound metabolic process	GO:0006725	0.00011	0.00181	0	0	0	0	Ywhaq|1;Cbx1|1;Pabpc1|1;H2afz|1;Ep300|1;Spta1|1;H2afj|1;Hnrnpa1|1;Taldo1|1;Atp5j|1;Mcee|1;Tfam|1;Hmgn2|1;Hnrnpa2b1|1;Idh2|1;Atp5d|1;Taf6|1;Ptges3|1;Lrpprc|1;Ldha|1;Atp5h|1;Ndufc2|1;Aldh1l1|1;Sdha|1;Prdx3|1;Ube2o|1;Gpd2|1;Ppp3ca|1;Uqcrb|1;Atp5f1|1;Got2|1;Abat|1;Atp5o|1;Pdhx|1;Iba57|1;Eno1|1;Tceal3|1;H2afy2|1;Dlat|1;Pura|1;Atp6v0a1|1;Dld|1;Hnrnpm|1;Cnp|1;Uqcr10|1;Top1|1;Acat1|1;Basp1|1;Atp5e|1;Hsp9…	58	16103	126	53607	http://www.ebi.ac.uk/QuickGO/GTerm?id=GO:0006725	[]
4	4	modulation of synaptic transmission	GO:0050804	0.000111	0.00182	0	0	0	0	Dbi|1;Ywhag|1;Cyfip1|1;Gnai1|1;Ppp3ca|1;Abat|1;Syn1|1;Rac1|1;Calb1|1	9	790	126	53607	http://www.ebi.ac.uk/QuickGO/GTerm?id=GO:0050804	[]
7	5,7	cellular amino acid biosynthetic process	GO:0008652	0.000114	0.00185	0	0	0	0	Psat1|1;Glud1|1;Got2|1;Abat|1;Ass1|1	5	199	126	53607	http://www.ebi.ac.uk/QuickGO/GTerm?id=GO:0008652	[]
4	4	response to nitrogen compound	GO:1901698	0.000114	0.00185	0	0	0	0	H2afz|1;Ep300|1;Ywhag|1;Hnrnpa2b1|1;Cyfip1|1;Rock2|1;Gnao1|1;Ppp3ca|1;Got2|1;Abat|1;Eef2|1;Anxa5|1;Hsp90ab1|1;Ass1|1;Slc1a2|1;Hspd1|1	16	2321	126	53607	http://www.ebi.ac.uk/QuickGO/GTerm?id=GO:1901698	[]
10	9,10	NADH metabolic process	GO:0006734	0.000146	0.00235	0	0	0	0	Ldha|1;Gpd2|1;Mdh1|1	3	43	126	53607	http://www.ebi.ac.uk/QuickGO/GTerm?id=GO:0006734	[]
4	4	positive regulation of muscle adaptation	GO:0014744	0.000152	0.00243	0	0	0	0	Ep300|1;Ppp3ca|1	2	8	126	53607	http://www.ebi.ac.uk/QuickGO/GTerm?id=GO:0014744	[]
3	3	nitrogen compound metabolic process	GO:0006807	0.000156	0.00246	0	0	0	0	Ywhaq|1;Cbx1|1;Pabpc1|1;H2afz|1;Ep300|1;Dbi|1;Spta1|1;H2afj|1;Hnrnpa1|1;Taldo1|1;Atp5j|1;Hbb-b1|1;Mcee|1;Tfam|1;Hmgn2|1;Hnrnpa2b1|1;Psat1|1;Cltc|1;Cyfip1|1;Jade3|1;Idh2|1;Atp5d|1;Rock2|1;Taf6|1;Ppa2|1;Ptges3|1;Lrpprc|1;Lypla1|1;Aldh5a1|1;Ldha|1;Atp5h|1;Ndufc2|1;Aldh1l1|1;Sdha|1;Prdx3|1;Ube2o|1;Sptbn1|1;Gpd2|1;Ppp3ca|1;Uqcrb|1;Glud1|1;Atp5f1|1;Got2|1;Abat|1;Atp5o|1;Pdhx|1;Eef2|1;Pdk1|1;Ywhae|1;Spt…	80	25257	126	53607	http://www.ebi.ac.uk/QuickGO/GTerm?id=GO:0006807	[]
7	7	monovalent inorganic cation transport	GO:0015672	0.000156	0.00246	0	0	0	0	Atp5j|1;Atp5d|1;Atp5h|1;Uqcrb|1;Atp5f1|1;Atp5o|1;Ywhae|1;Atp6v0a1|1;Uqcr10|1;Atp5e|1;Atp5a1|1;Slc12a2|1	12	1438	126	53607	http://www.ebi.ac.uk/QuickGO/GTerm?id=GO:0015672	[]
5	5	single-organism carbohydrate catabolic process	GO:0044724	0.000159	0.00251	0	0	0	0	Ldha|1;Gpd2|1;Eno1|1;Pygb|1;Pdha1|1;Tpi1|1	6	339	126	53607	http://www.ebi.ac.uk/QuickGO/GTerm?id=GO:0044724	[]
7	6,7	cation transmembrane transport	GO:0098655	0.00017	0.00266	0	0	0	0	Dbi|1;Atp5j|1;Atp5d|1;Atp5h|1;Uqcrb|1;Atp5f1|1;Atp5o|1;Atp2b1|1;Ywhae|1;Atp6v0a1|1;Uqcr10|1;Atp5e|1;Atp5a1|1;Slc12a2|1	14	1912	126	53607	http://www.ebi.ac.uk/QuickGO/GTerm?id=GO:0098655	[]
7	6,7	ATP synthesis coupled electron transport	GO:0042773	0.000174	0.00271	0	0	0	0	Ndufc2|1;Sdha|1;Uqcrb|1;Dld|1;Uqcr10|1	5	218	126	53607	http://www.ebi.ac.uk/QuickGO/GTerm?id=GO:0042773	[]
4	4	carbohydrate metabolic process	GO:0005975	0.000179	0.00277	0	0	0	0	Taldo1|1;Cltc|1;Idh2|1;Ptges3|1;Aldh5a1|1;Ldha|1;Gpd2|1;Pdk1|1;Eno1|1;Dlat|1;Pygb|1;Cs|1;Pdha1|1;Tpi1|1;Mdh1|1	15	2164	126	53607	http://www.ebi.ac.uk/QuickGO/GTerm?id=GO:0005975	[]
6	5,6	regulation of establishment of protein localization	GO:0070201	0.000183	0.00282	0	0	0	0	Ep300|1;Idh2|1;Lypla1|1;Sptbn1|1;Ppp3ca|1;Glud1|1;Abat|1;Anxa5|1;Ywhae|1;Cyb5r1|1;Hnrnpm|1;Hsp90ab1|1;Hspd1|1;Vsnl1|1	14	1926	126	53607	http://www.ebi.ac.uk/QuickGO/GTerm?id=GO:0070201	[]
3	3	positive regulation of cellular protein localization	GO:1903829	0.00019	0.00292	0	0	0	0	Ep300|1;Rock2|1;Sptbn1|1;Gnai1|1;Ppp3ca|1;Ywhae|1;Cyb5r1|1;Hnrnpm|1;Hsp90ab1|1	9	849	126	53607	http://www.ebi.ac.uk/QuickGO/GTerm?id=GO:1903829	[]
5	5	carbohydrate catabolic process	GO:0016052	0.000192	0.00293	0	0	0	0	Ldha|1;Gpd2|1;Eno1|1;Pygb|1;Pdha1|1;Tpi1|1	6	351	126	53607	http://www.ebi.ac.uk/QuickGO/GTerm?id=GO:0016052	[]
8	8	cellular response to mineralocorticoid stimulus	GO:0071389	0.000195	0.00296	0	0	0	0	Ep300|1;Atp2b1|1	2	9	126	53607	http://www.ebi.ac.uk/QuickGO/GTerm?id=GO:0071389	[]
4	4	response to toxic substance	GO:0009636	0.000198	0.00299	0	0	0	0	Ep300|1;Prdx3|1;Hba|1;Cnp|1;Ass1|1;Hspa9|1;Fam213b|1	7	503	126	53607	http://www.ebi.ac.uk/QuickGO/GTerm?id=GO:0009636	[]
3	3	catabolic process	GO:0009056	0.000206	0.00309	0	0	0	0	Pabpc1|1;Dbi|1;Cltc|1;Etfdh|1;Lrpprc|1;Lypla1|1;Aldh5a1|1;Ldha|1;Aldh1l1|1;Prdx3|1;Gpd2|1;Glud1|1;Got2|1;Abat|1;Anxa5|1;Pdk1|1;Eno1|1;Pygb|1;Atp6v0a1|1;Mccc1|1;Cnp|1;Acat1|1;Sat2|1;Hsp90ab1|1;Pdha1|1;Tpi1|1;Mdh1|1	27	5571	126	53607	http://www.ebi.ac.uk/QuickGO/GTerm?id=GO:0009056	[]
7	6,7	cellular response to steroid hormone stimulus	GO:0071383	0.000229	0.00342	0	0	0	0	H2afz|1;Ep300|1;Rock2|1;Ptges3|1;Atp2b1|1;Ass1|1;Calr|1	7	515	126	53607	http://www.ebi.ac.uk/QuickGO/GTerm?id=GO:0071383	[]
5	5	response to ketone	GO:1901654	0.000234	0.00345	0	0	0	0	Ep300|1;Rock2|1;Gnai1|1;Atp2b1|1;Ass1|1;Calr|1	6	364	126	53607	http://www.ebi.ac.uk/QuickGO/GTerm?id=GO:1901654	[]
8	6,7,8	regulation of translation	GO:0006417	0.000234	0.00345	0	0	0	0	Ep300|1;Hbb-b1|1;Hnrnpa2b1|1;Cyfip1|1;Lrpprc|1;Ppp3ca|1;Eef2|1;Pura|1;Calr|1	9	873	126	53607	http://www.ebi.ac.uk/QuickGO/GTerm?id=GO:0006417	[]
4	4	homeostatic process	GO:0042592	0.000242	0.00355	0	0	0	0	Ep300|1;Dbi|1;Spta1|1;Hbb-b1|1;Hnrnpa2b1|1;Ptges3|1;Immt|1;Prdx3|1;Ppp3ca|1;Abat|1;Atp2b1|1;Hba|1;Ywhae|1;Atp6v0a1|1;Dld|1;Anxa6|1;Hsp90ab1|1;Rac1|1;Hspa9|1;Slc12a2|1;Calb1|1;Vsnl1|1	22	4126	126	53607	http://www.ebi.ac.uk/QuickGO/GTerm?id=GO:0042592	[]
5	5	carbohydrate derivative biosynthetic process	GO:1901137	0.000249	0.00364	0	0	0	0	Ep300|1;Atp5j|1;Cltc|1;Atp5d|1;Atp5h|1;Ndufc2|1;Atp5f1|1;Atp5o|1;Atp6v0a1|1;Acat1|1;Atp5e|1;Atp5a1|1;Tpi1|1	13	1745	126	53607	http://www.ebi.ac.uk/QuickGO/GTerm?id=GO:1901137	[]
4	4	response to organic substance	GO:0010033	0.000256	0.00372	0	0	0	0	H2afz|1;Ep300|1;Ywhag|1;Afp|1;Hnrnpa2b1|1;Cyfip1|1;Rock2|1;Ptges3|1;Prdx3|1;Gnao1|1;Ube2o|1;Gnai1|1;Ppp3ca|1;Hspa4l|1;Got2|1;Abat|1;Atp2b1|1;Hba|1;Eef2|1;Anxa5|1;Cnp|1;Acat1|1;Hsp90ab1|1;Ass1|1;Slc1a2|1;Sh3gl2|1;Hspd1|1;Hspa9|1;Calb1|1;Vsnl1|1;Calr|1	31	6913	126	53607	http://www.ebi.ac.uk/QuickGO/GTerm?id=GO:0010033	[]
7	6,7	nucleocytoplasmic transport	GO:0006913	0.00026	0.00377	0	0	0	0	Ep300|1;Hnrnpa1|1;Hnrnpa2b1|1;Sptbn1|1;Ppp3ca|1;Ywhae|1;Hsp90ab1|1;Hspa9|1;Calr|1	9	886	126	53607	http://www.ebi.ac.uk/QuickGO/GTerm?id=GO:0006913	[]
3	3	anatomical structure development	GO:0048856	0.000267	0.00384	0	0	0	0	Ywhaq|1;H2afz|1;Ep300|1;Dbi|1;Spta1|1;Atp5j|1;Ywhag|1;Hbb-b1|1;Afp|1;Negr1|1;Cyfip1|1;Idh2|1;Rock2|1;Aco2|1;Ptges3|1;Aldh5a1|1;Sdha|1;Prdx3|1;Gnao1|1;Gpd2|1;Ppp3ca|1;Glud1|1;Atp5f1|1;Got2|1;Abat|1;Atp2b1|1;Hba|1;Eef2|1;Ywhae|1;Eno1|1;H2afy2|1;Syn1|1;Pura|1;Dld|1;Psd3|1;Cnp|1;Top1|1;Acat1|1;Basp1|1;Hsp90ab1|1;Ass1|1;Slc1a2|1;Rac1|1;Sh3gl2|1;Hspd1|1;Hspa9|1;Slc12a2|1;Epb41l3|1;Calb1|1;Tpi1|1;Slc32a…	52	14303	126	53607	http://www.ebi.ac.uk/QuickGO/GTerm?id=GO:0048856	[]
4	4	cellular amino acid metabolic process	GO:0006520	0.000269	0.00386	0	0	0	0	Psat1|1;Aldh5a1|1;Aldh1l1|1;Glud1|1;Got2|1;Abat|1;Mccc1|1;Acat1|1;Ass1|1	9	890	126	53607	http://www.ebi.ac.uk/QuickGO/GTerm?id=GO:0006520	[]
3	3	cellular component biogenesis	GO:0044085	0.000273	0.00389	0	0	0	0	Ywhaz|1;Ep300|1;Spta1|1;Sept11|1;Tfam|1;Cltc|1;H3f3c|1;Cyfip1|1;Rock2|1;Ptges3|1;Aldh5a1|1;Clybl|1;Ndufc2|1;Sptbn1|1;Uqcrb|1;Ndufa5|1;Anxa5|1;Iba57|1;H2afy2|1;Atp6v0a1|1;Uqcr10|1;Anxa6|1;Ndufb4|1;Acat1|1;Hsp90ab1|1;Slc1a2|1;Rac1|1;Sh3gl2|1;Hspa9|1;Epb41l3|1;Calr|1	31	6938	126	53607	http://www.ebi.ac.uk/QuickGO/GTerm?id=GO:0044085	[]
5	4,5	animal organ development	GO:0048513	0.000292	0.00414	0	0	0	0	Ywhaq|1;Ep300|1;Dbi|1;Spta1|1;Atp5j|1;Hbb-b1|1;Afp|1;Rock2|1;Aco2|1;Ptges3|1;Prdx3|1;Gnao1|1;Gpd2|1;Ppp3ca|1;Glud1|1;Atp5f1|1;Got2|1;Abat|1;Atp2b1|1;Hba|1;Eef2|1;Ywhae|1;H2afy2|1;Cnp|1;Acat1|1;Basp1|1;Hsp90ab1|1;Ass1|1;Slc1a2|1;Rac1|1;Hspa9|1;Slc12a2|1;Calb1|1;Slc32a1|1;Calr|1	35	8286	126	53607	http://www.ebi.ac.uk/QuickGO/GTerm?id=GO:0048513	[]
5	5	connective tissue replacement	GO:0097709	0.000297	0.00418	0	0	0	0	Rock2|1;Ppp3ca|1	2	11	126	53607	http://www.ebi.ac.uk/QuickGO/GTerm?id=GO:0097709	[]
10	6,7,8,9,10	prolactin secretion	GO:0070459	0.000297	0.00418	0	0	0	0	Abat|1;Anxa5|1	2	11	126	53607	http://www.ebi.ac.uk/QuickGO/GTerm?id=GO:0070459	[]
5	5	synaptic vesicle cycle	GO:0099504	0.000327	0.00458	0	0	0	0	Cyfip1|1;Syn1|1;Sh3gl2|1;Amph|1;Slc32a1|1	5	250	126	53607	http://www.ebi.ac.uk/QuickGO/GTerm?id=GO:0099504	[]
2	2	developmental process	GO:0032502	0.000349	0.00487	0	0	0	0	Ywhaq|1;H2afz|1;Ep300|1;Dbi|1;Spta1|1;Atp5j|1;Ywhag|1;Hbb-b1|1;Afp|1;Hmgn2|1;Cltc|1;Negr1|1;Cyfip1|1;Idh2|1;Rock2|1;Aco2|1;Ptges3|1;Aldh5a1|1;Sdha|1;Prdx3|1;Gnao1|1;Gpd2|1;Ppp3ca|1;Glud1|1;Atp5f1|1;Got2|1;Abat|1;Atp2b1|1;Hba|1;Eef2|1;Ywhae|1;Eno1|1;H2afy2|1;Syn1|1;Pura|1;Dld|1;Psd3|1;Cnp|1;Top1|1;Acat1|1;Basp1|1;Hsp90ab1|1;Ass1|1;Slc1a2|1;Rac1|1;Sh3gl2|1;Hspd1|1;Hspa9|1;Slc12a2|1;Epb41l3|1;Calb1|…	54	15208	126	53607	http://www.ebi.ac.uk/QuickGO/GTerm?id=GO:0032502	[]
4	4	heterocycle metabolic process	GO:0046483	0.000373	0.00518	0	0	0	0	Ywhaq|1;Cbx1|1;Pabpc1|1;H2afz|1;Ep300|1;Spta1|1;H2afj|1;Hnrnpa1|1;Taldo1|1;Atp5j|1;Mcee|1;Tfam|1;Hmgn2|1;Hnrnpa2b1|1;Idh2|1;Atp5d|1;Taf6|1;Ptges3|1;Lrpprc|1;Ldha|1;Atp5h|1;Ndufc2|1;Aldh1l1|1;Sdha|1;Prdx3|1;Ube2o|1;Gpd2|1;Ppp3ca|1;Uqcrb|1;Atp5f1|1;Atp5o|1;Pdhx|1;Iba57|1;Eno1|1;Tceal3|1;H2afy2|1;Dlat|1;Pura|1;Atp6v0a1|1;Dld|1;Hnrnpm|1;Cnp|1;Uqcr10|1;Top1|1;Acat1|1;Basp1|1;Atp5e|1;Hsp90ab1|1;Atp5a1|…	56	16012	126	53607	http://www.ebi.ac.uk/QuickGO/GTerm?id=GO:0046483	[]
9	7,9	glutamine family amino acid catabolic process	GO:0009065	0.000413	0.0057	0	0	0	0	Aldh5a1|1;Glud1|1;Got2|1	3	61	126	53607	http://www.ebi.ac.uk/QuickGO/GTerm?id=GO:0009065	[]
3	3	positive regulation of transport	GO:0051050	0.000415	0.0057	0	0	0	0	Ep300|1;Dbi|1;Sptbn1|1;Ppp3ca|1;Glud1|1;Abat|1;Ywhae|1;Cyb5r1|1;Hnrnpm|1;Sept5|1;Hsp90ab1|1;Slc1a2|1;Hspd1|1;Vsnl1|1;Calr|1	15	2343	126	53607	http://www.ebi.ac.uk/QuickGO/GTerm?id=GO:0051050	[]
4	4	macromolecular complex subunit organization	GO:0043933	0.000419	0.00572	0	0	0	0	Ep300|1;Spta1|1;Sept11|1;Tfam|1;Cltc|1;H3f3c|1;Cyfip1|1;Jade3|1;Ptges3|1;Aldh5a1|1;Clybl|1;Ndufc2|1;Sptbn1|1;Uqcrb|1;Ndufa5|1;Anxa5|1;H2afy2|1;Atp6v0a1|1;Uqcr10|1;Top1|1;Anxa6|1;Ndufb4|1;Acat1|1;Hsp90ab1|1;Slc1a2|1;Rac1|1;Sh3gl2|1;Calr|1	28	6140	126	53607	http://www.ebi.ac.uk/QuickGO/GTerm?id=GO:0043933	[]
6	6	cellular response to brain-derived neurotrophic factor stimulus	GO:1990416	0.00042	0.00572	0	0	0	0	Eef2|1;Sh3gl2|1	2	13	126	53607	http://www.ebi.ac.uk/QuickGO/GTerm?id=GO:1990416	[]
6	6	hexose metabolic process	GO:0019318	0.000425	0.00576	0	0	0	0	Aldh5a1|1;Ldha|1;Gpd2|1;Pdk1|1;Dlat|1;Pdha1|1;Tpi1|1	7	571	126	53607	http://www.ebi.ac.uk/QuickGO/GTerm?id=GO:0019318	[]
5	4,5	establishment of protein localization	GO:0045184	0.000446	0.00601	0	0	0	0	Ywhaq|1;Ywhaz|1;Ep300|1;Ywhag|1;Cltc|1;Idh2|1;Rock2|1;Lypla1|1;Sptbn1|1;Ppp3ca|1;Glud1|1;Abat|1;Anxa5|1;Ywhae|1;H2afy2|1;Cyb5r1|1;Hnrnpm|1;Copa|1;Hsp90ab1|1;Hspd1|1;Hspa9|1;Vsnl1|1;Calr|1	23	4612	126	53607	http://www.ebi.ac.uk/QuickGO/GTerm?id=GO:0045184	[]
8	6,7,8	regulation of protein import	GO:1904589	0.000464	0.00624	0	0	0	0	Ep300|1;Sptbn1|1;Ppp3ca|1;Hnrnpm|1;Hsp90ab1|1	5	270	126	53607	http://www.ebi.ac.uk/QuickGO/GTerm?id=GO:1904589	[]
3	3	primary metabolic process	GO:0044238	0.000479	0.00638	0	0	0	0	Ywhaq|1;Cbx1|1;Pabpc1|1;H2afz|1;Ep300|1;Dbi|1;H2afj|1;Hnrnpa1|1;Taldo1|1;Atp5j|1;Hbb-b1|1;Mcee|1;Afp|1;Tfam|1;Hmgn2|1;Hnrnpa2b1|1;Psat1|1;Cltc|1;Cyfip1|1;Jade3|1;Etfdh|1;Idh2|1;Atp5d|1;Rock2|1;Taf6|1;Aco2|1;Ppa2|1;Ptges3|1;Lrpprc|1;Lypla1|1;Aldh5a1|1;Ldha|1;Atp5h|1;Ndufc2|1;Aldh1l1|1;Sdha|1;Prdx3|1;Ube2o|1;Decr2|1;Sptbn1|1;Gpd2|1;Sucla2|1;Ppp3ca|1;Uqcrb|1;Hspa4l|1;Glud1|1;Atp5f1|1;Got2|1;Abat|1;A…	86	28618	126	53607	http://www.ebi.ac.uk/QuickGO/GTerm?id=GO:0044238	[]
6	4,5,6	transmembrane transport	GO:0055085	0.00048	0.00638	0	0	0	0	Ywhaq|1;Dbi|1;Atp5j|1;Slc25a3|1;Atp5d|1;Atp5h|1;Uqcrb|1;Atp5f1|1;Atp5o|1;Atp2b1|1;Ywhae|1;Atp6v0a1|1;Uqcr10|1;Anxa6|1;Atp5e|1;Atp5a1|1;Slc1a2|1;Hspd1|1;Slc12a2|1	19	3465	126	53607	http://www.ebi.ac.uk/QuickGO/GTerm?id=GO:0055085	[]
8	7,8	aspartate metabolic process	GO:0006531	0.00049	0.00644	0	0	0	0	Got2|1;Ass1|1	2	14	126	53607	http://www.ebi.ac.uk/QuickGO/GTerm?id=GO:0006531	[]
5	5	gamma-aminobutyric acid metabolic process	GO:0009448	0.00049	0.00644	0	0	0	0	Aldh5a1|1;Abat|1	2	14	126	53607	http://www.ebi.ac.uk/QuickGO/GTerm?id=GO:0009448	[]
3	3	single-organism developmental process	GO:0044767	0.000491	0.00644	0	0	0	0	Ywhaq|1;H2afz|1;Ep300|1;Dbi|1;Spta1|1;Atp5j|1;Ywhag|1;Hbb-b1|1;Afp|1;Cltc|1;Negr1|1;Cyfip1|1;Idh2|1;Rock2|1;Aco2|1;Ptges3|1;Aldh5a1|1;Sdha|1;Prdx3|1;Gnao1|1;Gpd2|1;Ppp3ca|1;Glud1|1;Atp5f1|1;Got2|1;Abat|1;Atp2b1|1;Hba|1;Eef2|1;Ywhae|1;Eno1|1;H2afy2|1;Syn1|1;Pura|1;Dld|1;Psd3|1;Cnp|1;Top1|1;Acat1|1;Basp1|1;Hsp90ab1|1;Ass1|1;Slc1a2|1;Rac1|1;Sh3gl2|1;Hspd1|1;Hspa9|1;Slc12a2|1;Epb41l3|1;Calb1|1;Tpi1|1…	53	15022	126	53607	http://www.ebi.ac.uk/QuickGO/GTerm?id=GO:0044767	[]
10	6,7,8,9,10	regulation of protein secretion	GO:0050708	0.000498	0.0065	0	0	0	0	Ep300|1;Idh2|1;Sptbn1|1;Ppp3ca|1;Glud1|1;Abat|1;Anxa5|1;Hspd1|1;Vsnl1|1	9	969	126	53607	http://www.ebi.ac.uk/QuickGO/GTerm?id=GO:0050708	[]
6	5,6	regulation of cellular protein localization	GO:1903827	0.000521	0.00676	0	0	0	0	Ep300|1;Cltc|1;Rock2|1;Lypla1|1;Sptbn1|1;Gnai1|1;Ppp3ca|1;Ywhae|1;Cyb5r1|1;Hnrnpm|1;Hsp90ab1|1	11	1411	126	53607	http://www.ebi.ac.uk/QuickGO/GTerm?id=GO:1903827	[]
6	6	cellular response to alcohol	GO:0097306	0.000521	0.00676	0	0	0	0	H2afz|1;Ep300|1;Rock2|1;Atp2b1|1;Ass1|1	5	277	126	53607	http://www.ebi.ac.uk/QuickGO/GTerm?id=GO:0097306	[]
3	3	negative regulation of transport	GO:0051051	0.000526	0.00678	0	0	0	0	Ywhaq|1;Cyfip1|1;Idh2|1;Lypla1|1;Gnao1|1;Ppp3ca|1;Abat|1;Anxa5|1;Ywhae|1;Vsnl1|1	10	1189	126	53607	http://www.ebi.ac.uk/QuickGO/GTerm?id=GO:0051051	[]
5	5	response to hydrogen peroxide	GO:0042542	0.000539	0.00692	0	0	0	0	Ep300|1;Prdx3|1;Gnao1|1;Eef2|1;Hspd1|1	5	279	126	53607	http://www.ebi.ac.uk/QuickGO/GTerm?id=GO:0042542	[]
7	4,6,7	gene silencing	GO:0016458	0.000571	0.0073	0	0	0	0	Pabpc1|1;H2afz|1;H2afj|1;Hnrnpa2b1|1;Ppp3ca|1;H2afy2|1	6	431	126	53607	http://www.ebi.ac.uk/QuickGO/GTerm?id=GO:0016458	[]
9	5,7,8,9	positive regulation of protein import	GO:1904591	0.00059	0.00751	0	0	0	0	Ep300|1;Ppp3ca|1;Hnrnpm|1;Hsp90ab1|1	4	161	126	53607	http://www.ebi.ac.uk/QuickGO/GTerm?id=GO:1904591	[]
4	4	response to hormone	GO:0009725	0.000615	0.0078	0	0	0	0	H2afz|1;Ep300|1;Ywhag|1;Cyfip1|1;Rock2|1;Ptges3|1;Got2|1;Atp2b1|1;Anxa5|1;Acat1|1;Ass1|1;Hspd1|1;Calr|1	13	1921	126	53607	http://www.ebi.ac.uk/QuickGO/GTerm?id=GO:0009725	[]
8	7,8	glutamate metabolic process	GO:0006536	0.000619	0.00781	0	0	0	0	Aldh5a1|1;Glud1|1;Got2|1	3	70	126	53607	http://www.ebi.ac.uk/QuickGO/GTerm?id=GO:0006536	[]
6	5,6	nuclear transport	GO:0051169	0.00064	0.00805	0	0	0	0	Ep300|1;Hnrnpa1|1;Hnrnpa2b1|1;Sptbn1|1;Ppp3ca|1;Ywhae|1;Hsp90ab1|1;Hspa9|1;Calr|1	9	1004	126	53607	http://www.ebi.ac.uk/QuickGO/GTerm?id=GO:0051169	[]
5	5	mitochondrial respiratory chain complex I biogenesis	GO:0097031	0.000699	0.00875	0	0	0	0	Ndufc2|1;Ndufa5|1;Ndufb4|1	3	73	126	53607	http://www.ebi.ac.uk/QuickGO/GTerm?id=GO:0097031	[]
9	6,7,8,9	mitochondrial respiratory chain complex I assembly	GO:0032981	0.000757	0.00939	0	0	0	0	Ndufc2|1;Ndufa5|1;Ndufb4|1	3	75	126	53607	http://www.ebi.ac.uk/QuickGO/GTerm?id=GO:0032981	[]
8	7,8	NADH dehydrogenase complex assembly	GO:0010257	0.000757	0.00939	0	0	0	0	Ndufc2|1;Ndufa5|1;Ndufb4|1	3	75	126	53607	http://www.ebi.ac.uk/QuickGO/GTerm?id=GO:0010257	[]
5	4,5	cellular modified amino acid metabolic process	GO:0006575	0.000782	0.00967	0	0	0	0	Aldh5a1|1;Aldh1l1|1;Got2|1;Aldh7a1|1;Ass1|1;Oplah|1	6	458	126	53607	http://www.ebi.ac.uk/QuickGO/GTerm?id=GO:0006575	[]
5	5	monosaccharide metabolic process	GO:0005996	0.000823	0.0101	0	0	0	0	Aldh5a1|1;Ldha|1;Gpd2|1;Pdk1|1;Dlat|1;Pdha1|1;Tpi1|1	7	639	126	53607	http://www.ebi.ac.uk/QuickGO/GTerm?id=GO:0005996	[]
5	5	cellular amide metabolic process	GO:0043603	0.000824	0.0101	0	0	0	0	Ep300|1;Hbb-b1|1;Hnrnpa2b1|1;Cyfip1|1;Rock2|1;Lrpprc|1;Aldh5a1|1;Aldh1l1|1;Ppp3ca|1;Eef2|1;Pura|1;Dld|1;Ass1|1;Oplah|1;Calr|1	15	2505	126	53607	http://www.ebi.ac.uk/QuickGO/GTerm?id=GO:0043603	[]
6	6	glutamine family amino acid metabolic process	GO:0009064	0.000876	0.0107	0	0	0	0	Aldh5a1|1;Glud1|1;Got2|1;Ass1|1	4	179	126	53607	http://www.ebi.ac.uk/QuickGO/GTerm?id=GO:0009064	[]
6	5,6	protein transport	GO:0015031	0.000877	0.0107	0	0	0	0	Ywhaq|1;Ywhaz|1;Ep300|1;Ywhag|1;Cltc|1;Idh2|1;Lypla1|1;Sptbn1|1;Ppp3ca|1;Glud1|1;Abat|1;Anxa5|1;Ywhae|1;Cyb5r1|1;Hnrnpm|1;Copa|1;Hsp90ab1|1;Hspd1|1;Hspa9|1;Vsnl1|1;Calr|1	21	4235	126	53607	http://www.ebi.ac.uk/QuickGO/GTerm?id=GO:0015031	[]
8	8	aspartate transport	GO:0015810	0.000913	0.011	0	0	0	0	Abat|1;Slc1a2|1	2	19	126	53607	http://www.ebi.ac.uk/QuickGO/GTerm?id=GO:0015810	[]
5	5	neurotransmitter catabolic process	GO:0042135	0.000913	0.011	0	0	0	0	Aldh5a1|1;Abat|1	2	19	126	53607	http://www.ebi.ac.uk/QuickGO/GTerm?id=GO:0042135	[]
8	8	isocitrate metabolic process	GO:0006102	0.000913	0.011	0	0	0	0	Idh2|1;Aco2|1	2	19	126	53607	http://www.ebi.ac.uk/QuickGO/GTerm?id=GO:0006102	[]
7	5,7	oxidative phosphorylation	GO:0006119	0.000941	0.0112	0	0	0	0	Ndufc2|1;Sdha|1;Uqcrb|1;Dld|1;Uqcr10|1	5	316	126	53607	http://www.ebi.ac.uk/QuickGO/GTerm?id=GO:0006119	[]
6	6	response to alkaloid	GO:0043279	0.000941	0.0112	0	0	0	0	Gnao1|1;Got2|1;Abat|1;Hsp90ab1|1;Hspd1|1	5	316	126	53607	http://www.ebi.ac.uk/QuickGO/GTerm?id=GO:0043279	[]
8	6,8	alpha-amino acid biosynthetic process	GO:1901607	0.000951	0.0113	0	0	0	0	Psat1|1;Glud1|1;Got2|1;Ass1|1	4	183	126	53607	http://www.ebi.ac.uk/QuickGO/GTerm?id=GO:1901607	[]
3	3	macromolecule localization	GO:0033036	0.000968	0.0114	0	0	0	0	Ywhaq|1;Ywhaz|1;Ep300|1;Hnrnpa1|1;Ywhag|1;Hnrnpa2b1|1;Cltc|1;Idh2|1;Rock2|1;Lrpprc|1;Lypla1|1;Sptbn1|1;Gnai1|1;Ppp3ca|1;Glud1|1;Got2|1;Abat|1;Anxa5|1;Ywhae|1;H2afy2|1;Cyb5r1|1;Hnrnpm|1;Copa|1;Hsp90ab1|1;Rac1|1;Hspd1|1;Hspa9|1;Epb41l3|1;Vsnl1|1;Calr|1	30	7134	126	53607	http://www.ebi.ac.uk/QuickGO/GTerm?id=GO:0033036	[]
5	5	organic substance transport	GO:0071702	0.00098	0.0115	0	0	0	0	Ywhaq|1;Ywhaz|1;Ep300|1;Hnrnpa1|1;Ywhag|1;Hnrnpa2b1|1;Cltc|1;Idh2|1;Lrpprc|1;Lypla1|1;Sptbn1|1;Ppp3ca|1;Glud1|1;Got2|1;Abat|1;Anxa5|1;Ywhae|1;Cyb5r1|1;Hnrnpm|1;Copa|1;Hsp90ab1|1;Slc1a2|1;Hspd1|1;Hspa9|1;Slc32a1|1;Vsnl1|1;Calr|1	27	6153	126	53607	http://www.ebi.ac.uk/QuickGO/GTerm?id=GO:0071702	[]
7	5,6,7	intracellular protein transport	GO:0006886	0.00106	0.0124	0	0	0	0	Ywhaq|1;Ywhaz|1;Ep300|1;Ywhag|1;Cltc|1;Lypla1|1;Sptbn1|1;Ppp3ca|1;Ywhae|1;Cyb5r1|1;Copa|1;Hsp90ab1|1;Hspd1|1;Hspa9|1;Calr|1	15	2568	126	53607	http://www.ebi.ac.uk/QuickGO/GTerm?id=GO:0006886	[]
5	5	cellular protein localization	GO:0034613	0.00108	0.0126	0	0	0	0	Ywhaq|1;Ywhaz|1;Ep300|1;Ywhag|1;Cltc|1;Rock2|1;Lypla1|1;Sptbn1|1;Gnai1|1;Ppp3ca|1;Ywhae|1;H2afy2|1;Cyb5r1|1;Hnrnpm|1;Copa|1;Hsp90ab1|1;Rac1|1;Hspd1|1;Hspa9|1;Epb41l3|1;Calr|1	21	4304	126	53607	http://www.ebi.ac.uk/QuickGO/GTerm?id=GO:0034613	[]
5	5	regulation of reactive oxygen species biosynthetic process	GO:1903426	0.00111	0.0129	0	0	0	0	Ndufc2|1;Hsp90ab1|1;Ass1|1;Hspd1|1	4	191	126	53607	http://www.ebi.ac.uk/QuickGO/GTerm?id=GO:1903426	[]
4	4	cellular catabolic process	GO:0044248	0.00113	0.0131	0	0	0	0	Pabpc1|1;Dbi|1;Cltc|1;Etfdh|1;Lrpprc|1;Aldh5a1|1;Aldh1l1|1;Prdx3|1;Gpd2|1;Glud1|1;Got2|1;Abat|1;Anxa5|1;Pdk1|1;Pygb|1;Atp6v0a1|1;Mccc1|1;Cnp|1;Acat1|1;Hsp90ab1|1;Tpi1|1;Mdh1|1	22	4626	126	53607	http://www.ebi.ac.uk/QuickGO/GTerm?id=GO:0044248	[]
4	4	cellular macromolecule localization	GO:0070727	0.00115	0.0133	0	0	0	0	Ywhaq|1;Ywhaz|1;Ep300|1;Ywhag|1;Cltc|1;Rock2|1;Lypla1|1;Sptbn1|1;Gnai1|1;Ppp3ca|1;Ywhae|1;H2afy2|1;Cyb5r1|1;Hnrnpm|1;Copa|1;Hsp90ab1|1;Rac1|1;Hspd1|1;Hspa9|1;Epb41l3|1;Calr|1	21	4327	126	53607	http://www.ebi.ac.uk/QuickGO/GTerm?id=GO:0070727	[]
3	3	protein folding	GO:0006457	0.00119	0.0137	0	0	0	0	Ptges3|1;Hspa4l|1;Hsp90ab1|1;Hspd1|1;Hspa9|1;Calr|1	6	497	126	53607	http://www.ebi.ac.uk/QuickGO/GTerm?id=GO:0006457	[]
7	6,7	posttranscriptional regulation of gene expression	GO:0010608	0.0012	0.0138	0	0	0	0	Ep300|1;Hbb-b1|1;Hnrnpa2b1|1;Cyfip1|1;Lrpprc|1;Ppp3ca|1;Eef2|1;Pura|1;Calr|1	9	1099	126	53607	http://www.ebi.ac.uk/QuickGO/GTerm?id=GO:0010608	[]
4	4	single-organism carbohydrate metabolic process	GO:0044723	0.00122	0.0138	0	0	0	0	Cltc|1;Idh2|1;Ptges3|1;Aldh5a1|1;Ldha|1;Gpd2|1;Pdk1|1;Eno1|1;Dlat|1;Pygb|1;Pdha1|1;Tpi1|1	12	1814	126	53607	http://www.ebi.ac.uk/QuickGO/GTerm?id=GO:0044723	[]
5	5	liver development	GO:0001889	0.00122	0.0138	0	0	0	0	Ep300|1;Afp|1;Aco2|1;Acat1|1;Ass1|1	5	335	126	53607	http://www.ebi.ac.uk/QuickGO/GTerm?id=GO:0001889	[]
7	6,7	oxygen transport	GO:0015671	0.00123	0.0139	0	0	0	0	Hbb-b1|1;Hba|1	2	22	126	53607	http://www.ebi.ac.uk/QuickGO/GTerm?id=GO:0015671	[]
9	8,9	NADP metabolic process	GO:0006739	0.00124	0.014	0	0	0	0	Taldo1|1;Idh2|1;Tpi1|1	3	89	126	53607	http://www.ebi.ac.uk/QuickGO/GTerm?id=GO:0006739	[]
8	4,8	glial cell proliferation	GO:0014009	0.00132	0.0148	0	0	0	0	Dbi|1;Idh2|1;Eef2|1	3	91	126	53607	http://www.ebi.ac.uk/QuickGO/GTerm?id=GO:0014009	[]
4	4	nucleobase-containing compound metabolic process	GO:0006139	0.00133	0.0148	0	0	0	0	Ywhaq|1;Cbx1|1;Pabpc1|1;H2afz|1;Ep300|1;H2afj|1;Hnrnpa1|1;Taldo1|1;Atp5j|1;Mcee|1;Tfam|1;Hmgn2|1;Hnrnpa2b1|1;Idh2|1;Atp5d|1;Taf6|1;Ptges3|1;Lrpprc|1;Ldha|1;Atp5h|1;Ndufc2|1;Sdha|1;Prdx3|1;Ube2o|1;Gpd2|1;Ppp3ca|1;Uqcrb|1;Atp5f1|1;Atp5o|1;Pdhx|1;Eno1|1;Tceal3|1;H2afy2|1;Dlat|1;Pura|1;Atp6v0a1|1;Dld|1;Hnrnpm|1;Cnp|1;Uqcr10|1;Top1|1;Acat1|1;Basp1|1;Atp5e|1;Hsp90ab1|1;Atp5a1|1;Rac1|1;Hspd1|1;Pdha1|1;M…	53	15624	126	53607	http://www.ebi.ac.uk/QuickGO/GTerm?id=GO:0006139	[]
4	4	regulation of transport	GO:0051049	0.00133	0.0148	0	0	0	0	Ywhaq|1;Ep300|1;Dbi|1;Cyfip1|1;Idh2|1;Lypla1|1;Gnao1|1;Sptbn1|1;Ppp3ca|1;Glud1|1;Abat|1;Anxa5|1;Ywhae|1;Cyb5r1|1;Hnrnpm|1;Sept5|1;Hsp90ab1|1;Slc1a2|1;Sh3gl2|1;Hspd1|1;Vsnl1|1;Calr|1	22	4686	126	53607	http://www.ebi.ac.uk/QuickGO/GTerm?id=GO:0051049	[]
6	6	mitochondrial respiratory chain complex III assembly	GO:0034551	0.00134	0.0148	0	0	0	0	Uqcrb|1;Uqcr10|1	2	23	126	53607	http://www.ebi.ac.uk/QuickGO/GTerm?id=GO:0034551	[]
9	8,9	respiratory chain complex III assembly	GO:0017062	0.00134	0.0148	0	0	0	0	Uqcrb|1;Uqcr10|1	2	23	126	53607	http://www.ebi.ac.uk/QuickGO/GTerm?id=GO:0017062	[]
8	6,7,8	positive regulation of DNA replication	GO:0045740	0.00134	0.0148	0	0	0	0	Ptges3|1;Hsp90ab1|1;Rac1|1;Calr|1	4	201	126	53607	http://www.ebi.ac.uk/QuickGO/GTerm?id=GO:0045740	[]
5	5	hepaticobiliary system development	GO:0061008	0.00135	0.0148	0	0	0	0	Ep300|1;Afp|1;Aco2|1;Acat1|1;Ass1|1	5	343	126	53607	http://www.ebi.ac.uk/QuickGO/GTerm?id=GO:0061008	[]
5	4,5	cellular homeostasis	GO:0019725	0.00137	0.015	0	0	0	0	Ep300|1;Dbi|1;Immt|1;Prdx3|1;Ppp3ca|1;Atp2b1|1;Ywhae|1;Atp6v0a1|1;Dld|1;Anxa6|1;Slc12a2|1;Calb1|1;Vsnl1|1	13	2098	126	53607	http://www.ebi.ac.uk/QuickGO/GTerm?id=GO:0019725	[]
6	5,6	mitochondrial transport	GO:0006839	0.00142	0.0155	0	0	0	0	Ywhaz|1;Slc25a3|1;Atp5o|1;Cyb5r1|1;Cnp|1;Hspd1|1	6	515	126	53607	http://www.ebi.ac.uk/QuickGO/GTerm?id=GO:0006839	[]
9	8,9	NAD metabolic process	GO:0019674	0.00145	0.0158	0	0	0	0	Ldha|1;Gpd2|1;Mdh1|1	3	94	126	53607	http://www.ebi.ac.uk/QuickGO/GTerm?id=GO:0019674	[]
5	5	mitochondrial respiratory chain complex III biogenesis	GO:0097033	0.00146	0.0158	0	0	0	0	Uqcrb|1;Uqcr10|1	2	24	126	53607	http://www.ebi.ac.uk/QuickGO/GTerm?id=GO:0097033	[]
5	5	cellular response to hormone stimulus	GO:0032870	0.00148	0.0159	0	0	0	0	H2afz|1;Ep300|1;Ywhag|1;Cyfip1|1;Rock2|1;Ptges3|1;Atp2b1|1;Anxa5|1;Ass1|1;Calr|1	10	1364	126	53607	http://www.ebi.ac.uk/QuickGO/GTerm?id=GO:0032870	[]
5	5	response to steroid hormone	GO:0048545	0.00153	0.0164	0	0	0	0	H2afz|1;Ep300|1;Rock2|1;Ptges3|1;Atp2b1|1;Ass1|1;Hspd1|1;Calr|1	8	918	126	53607	http://www.ebi.ac.uk/QuickGO/GTerm?id=GO:0048545	[]
8	6,7,8	peptide secretion	GO:0002790	0.00154	0.0164	0	0	0	0	Ep300|1;Idh2|1;Sptbn1|1;Ppp3ca|1;Glud1|1;Abat|1;Anxa5|1;Hspd1|1;Vsnl1|1	9	1139	126	53607	http://www.ebi.ac.uk/QuickGO/GTerm?id=GO:0002790	[]
9	8,9	C4-dicarboxylate transport	GO:0015740	0.00159	0.0168	0	0	0	0	Abat|1;Slc1a2|1	2	25	126	53607	http://www.ebi.ac.uk/QuickGO/GTerm?id=GO:0015740	[]
6	6	coenzyme catabolic process	GO:0009109	0.00159	0.0168	0	0	0	0	Aldh1l1|1;Acat1|1	2	25	126	53607	http://www.ebi.ac.uk/QuickGO/GTerm?id=GO:0009109	[]
8	7,8	nuclear export	GO:0051168	0.00161	0.017	0	0	0	0	Hnrnpa1|1;Hnrnpa2b1|1;Ywhae|1;Hspa9|1;Calr|1	5	357	126	53607	http://www.ebi.ac.uk/QuickGO/GTerm?id=GO:0051168	[]
4	4	ammonium ion metabolic process	GO:0097164	0.00169	0.0178	0	0	0	0	Dbi|1;Abat|1;Sptlc3|1;Aldh7a1|1;Sat2|1	5	361	126	53607	http://www.ebi.ac.uk/QuickGO/GTerm?id=GO:0097164	[]
6	3,5,6	negative regulation of establishment of protein localization	GO:1904950	0.00169	0.0178	0	0	0	0	Idh2|1;Lypla1|1;Ppp3ca|1;Anxa5|1;Vsnl1|1	5	361	126	53607	http://www.ebi.ac.uk/QuickGO/GTerm?id=GO:1904950	[]
6	5,6	plasma membrane organization	GO:0007009	0.0017	0.0178	0	0	0	0	Spta1|1;Cltc|1;Rock2|1;Lypla1|1;Sptbn1|1;Rac1|1;Sh3gl2|1;Epb41l3|1	8	934	126	53607	http://www.ebi.ac.uk/QuickGO/GTerm?id=GO:0007009	[]
10	5,6,7,8,9,10	positive regulation of protein secretion	GO:0050714	0.00176	0.0183	0	0	0	0	Ep300|1;Sptbn1|1;Glud1|1;Abat|1;Hspd1|1;Vsnl1|1	6	537	126	53607	http://www.ebi.ac.uk/QuickGO/GTerm?id=GO:0050714	[]
5	5	response to metal ion	GO:0010038	0.00178	0.0185	0	0	0	0	Ep300|1;Ppp3ca|1;Glud1|1;Abat|1;Anxa5|1;Ass1|1;Calr|1	7	731	126	53607	http://www.ebi.ac.uk/QuickGO/GTerm?id=GO:0010038	[]
7	7	dicarboxylic acid biosynthetic process	GO:0043650	0.00185	0.0192	0	0	0	0	Glud1|1;Got2|1	2	27	126	53607	http://www.ebi.ac.uk/QuickGO/GTerm?id=GO:0043650	[]
6	6	protein localization to cell periphery	GO:1990778	0.00187	0.0193	0	0	0	0	Cltc|1;Rock2|1;Lypla1|1;Sptbn1|1;Gnai1|1;Rac1|1;Epb41l3|1	7	738	126	53607	http://www.ebi.ac.uk/QuickGO/GTerm?id=GO:1990778	[]
5	4,5	cellular carbohydrate metabolic process	GO:0044262	0.0019	0.0196	0	0	0	0	Idh2|1;Ptges3|1;Gpd2|1;Pdk1|1;Pygb|1;Cs|1;Tpi1|1	7	740	126	53607	http://www.ebi.ac.uk/QuickGO/GTerm?id=GO:0044262	[]
7	7	anterograde trans-synaptic signaling	GO:0098916	0.00192	0.0197	0	0	0	0	Dbi|1;Ywhag|1;Cyfip1|1;Gnai1|1;Ppp3ca|1;Abat|1;Syn1|1;Rac1|1;Calb1|1	9	1177	126	53607	http://www.ebi.ac.uk/QuickGO/GTerm?id=GO:0098916	[]
2	2	multicellular organismal process	GO:0032501	0.00192	0.0197	0	0	0	0	Ywhaq|1;Ywhaz|1;H2afz|1;Ep300|1;Dbi|1;Spta1|1;Atp5j|1;Ywhag|1;Hbb-b1|1;Afp|1;Cltc|1;Negr1|1;Cyfip1|1;Idh2|1;Rock2|1;Aco2|1;Ptges3|1;Aldh5a1|1;Sdha|1;Prdx3|1;Gnao1|1;Sptbn1|1;Gpd2|1;Ppp3ca|1;Glud1|1;Atp5f1|1;Got2|1;Abat|1;Atp2b1|1;Hba|1;Eef2|1;Anxa5|1;Ywhae|1;Eno1|1;H2afy2|1;Dlat|1;Syn1|1;Pura|1;Dld|1;Psd3|1;Cnp|1;Top1|1;Anxa6|1;Acat1|1;Basp1|1;Copa|1;Hsp90ab1|1;Ass1|1;Atp5a1|1;Slc1a2|1;Rac1|1;Sh3…	61	19026	126	53607	http://www.ebi.ac.uk/QuickGO/GTerm?id=GO:0032501	[]
6	6	trans-synaptic signaling	GO:0099537	0.00194	0.0198	0	0	0	0	Dbi|1;Ywhag|1;Cyfip1|1;Gnai1|1;Ppp3ca|1;Abat|1;Syn1|1;Rac1|1;Calb1|1	9	1179	126	53607	http://www.ebi.ac.uk/QuickGO/GTerm?id=GO:0099537	[]
6	6	negative regulation of RNA catabolic process	GO:1902369	0.00199	0.0202	0	0	0	0	Pabpc1|1;Lrpprc|1	2	28	126	53607	http://www.ebi.ac.uk/QuickGO/GTerm?id=GO:1902369	[]
6	6	synaptic vesicle recycling	GO:0036465	0.002	0.0202	0	0	0	0	Cyfip1|1;Sh3gl2|1;Amph|1	3	105	126	53607	http://www.ebi.ac.uk/QuickGO/GTerm?id=GO:0036465	[]
4	4	response to oxidative stress	GO:0006979	0.00203	0.0205	0	0	0	0	Ep300|1;Etfdh|1;Prdx3|1;Gnao1|1;Eef2|1;Pdk1|1;Ndufb4|1;Hspd1|1	8	961	126	53607	http://www.ebi.ac.uk/QuickGO/GTerm?id=GO:0006979	[]
8	6,7,8	protein targeting	GO:0006605	0.00205	0.0206	0	0	0	0	Ywhaq|1;Ywhaz|1;Ep300|1;Ywhag|1;Sptbn1|1;Ppp3ca|1;Ywhae|1;Cyb5r1|1;Hsp90ab1|1;Hspd1|1	10	1426	126	53607	http://www.ebi.ac.uk/QuickGO/GTerm?id=GO:0006605	[]
7	5,6,7	positive regulation of nucleocytoplasmic transport	GO:0046824	0.00209	0.0209	0	0	0	0	Ep300|1;Ppp3ca|1;Ywhae|1;Hsp90ab1|1	4	227	126	53607	http://www.ebi.ac.uk/QuickGO/GTerm?id=GO:0046824	[]
7	7	monocarboxylic acid catabolic process	GO:0072329	0.00213	0.0212	0	0	0	0	Dbi|1;Etfdh|1;Aldh5a1|1;Acat1|1	4	228	126	53607	http://www.ebi.ac.uk/QuickGO/GTerm?id=GO:0072329	[]
7	6,7	cortical actin cytoskeleton organization	GO:0030866	0.00216	0.0215	0	0	0	0	Rock2|1;Epb41l3|1;Calr|1	3	108	126	53607	http://www.ebi.ac.uk/QuickGO/GTerm?id=GO:0030866	[]
5	5	response to lipid	GO:0033993	0.00221	0.0219	0	0	0	0	H2afz|1;Ep300|1;Rock2|1;Ptges3|1;Prdx3|1;Gnai1|1;Atp2b1|1;Eef2|1;Cnp|1;Ass1|1;Hspd1|1;Calr|1	12	1949	126	53607	http://www.ebi.ac.uk/QuickGO/GTerm?id=GO:0033993	[]
5	5	synaptic signaling	GO:0099536	0.00224	0.022	0	0	0	0	Dbi|1;Ywhag|1;Cyfip1|1;Gnai1|1;Ppp3ca|1;Abat|1;Syn1|1;Rac1|1;Calb1|1	9	1204	126	53607	http://www.ebi.ac.uk/QuickGO/GTerm?id=GO:0099536	[]
5	5	cellular response to nerve growth factor stimulus	GO:1990090	0.00228	0.022	0	0	0	0	Ep300|1;Eef2|1;Sh3gl2|1	3	110	126	53607	http://www.ebi.ac.uk/QuickGO/GTerm?id=GO:1990090	[]
11	6,7,9,10,11	positive regulation of protein import into nucleus, translocation	GO:0033160	0.00228	0.022	0	0	0	0	Ep300|1;Hsp90ab1|1	2	30	126	53607	http://www.ebi.ac.uk/QuickGO/GTerm?id=GO:0033160	[]
11	6,7,8,9,10,11	negative regulation of prolactin secretion	GO:1902721	0.00235	0.022	0	0	0	0	Anxa5|1	1	1	126	53607	http://www.ebi.ac.uk/QuickGO/GTerm?id=GO:1902721	[]
12	6,7,11,12	regulation of presynaptic cytosolic calcium ion concentration	GO:0099509	0.00235	0.022	0	0	0	0	Calb1|1	1	1	126	53607	http://www.ebi.ac.uk/QuickGO/GTerm?id=GO:0099509	[]
5	5	dihydrolipoamide metabolic process	GO:0051068	0.00235	0.022	0	0	0	0	Dld|1	1	1	126	53607	http://www.ebi.ac.uk/QuickGO/GTerm?id=GO:0051068	[]
7	6,7	L-methylmalonyl-CoA metabolic process	GO:0046491	0.00235	0.022	0	0	0	0	Mcee|1	1	1	126	53607	http://www.ebi.ac.uk/QuickGO/GTerm?id=GO:0046491	[]
8	7,8	metanephric connecting tubule development	GO:0072286	0.00235	0.022	0	0	0	0	Calb1|1	1	1	126	53607	http://www.ebi.ac.uk/QuickGO/GTerm?id=GO:0072286	[]
7	6,7	anaerobic respiration	GO:0009061	0.00235	0.022	0	0	0	0	Sdha|1	1	1	126	53607	http://www.ebi.ac.uk/QuickGO/GTerm?id=GO:0009061	[]
8	5,7,8	aspartate secretion	GO:0061528	0.00235	0.022	0	0	0	0	Abat|1	1	1	126	53607	http://www.ebi.ac.uk/QuickGO/GTerm?id=GO:0061528	[]
7	6,7	propionyl-CoA metabolic process	GO:1902858	0.00235	0.022	0	0	0	0	Acat1|1	1	1	126	53607	http://www.ebi.ac.uk/QuickGO/GTerm?id=GO:1902858	[]
8	7,8	propionyl-CoA biosynthetic process	GO:1902860	0.00235	0.022	0	0	0	0	Acat1|1	1	1	126	53607	http://www.ebi.ac.uk/QuickGO/GTerm?id=GO:1902860	[]
6	5,6	detection of misfolded protein	GO:0002236	0.00235	0.022	0	0	0	0	Hspd1|1	1	1	126	53607	http://www.ebi.ac.uk/QuickGO/GTerm?id=GO:0002236	[]
9	6,8,9	regulation of aspartate secretion	GO:1904448	0.00235	0.022	0	0	0	0	Abat|1	1	1	126	53607	http://www.ebi.ac.uk/QuickGO/GTerm?id=GO:1904448	[]
7	7	connecting tubule development	GO:0072027	0.00235	0.022	0	0	0	0	Calb1|1	1	1	126	53607	http://www.ebi.ac.uk/QuickGO/GTerm?id=GO:0072027	[]
10	5,6,7,9,10	positive regulation of aspartate secretion	GO:1904450	0.00235	0.022	0	0	0	0	Abat|1	1	1	126	53607	http://www.ebi.ac.uk/QuickGO/GTerm?id=GO:1904450	[]
11	6,7,8,9,10,11	negative regulation of matrix metallopeptidase secretion	GO:1904465	0.00235	0.022	0	0	0	0	Idh2|1	1	1	126	53607	http://www.ebi.ac.uk/QuickGO/GTerm?id=GO:1904465	[]
8	6,8	branched-chain amino acid catabolic process	GO:0009083	0.00244	0.0228	0	0	0	0	Mccc1|1;Acat1|1	2	31	126	53607	http://www.ebi.ac.uk/QuickGO/GTerm?id=GO:0009083	[]
8	5,6,8	negative regulation of peptide hormone secretion	GO:0090278	0.00252	0.0234	0	0	0	0	Ppp3ca|1;Anxa5|1;Vsnl1|1	3	114	126	53607	http://www.ebi.ac.uk/QuickGO/GTerm?id=GO:0090278	[]
5	5	response to cocaine	GO:0042220	0.00252	0.0234	0	0	0	0	Abat|1;Hsp90ab1|1;Hspd1|1	3	114	126	53607	http://www.ebi.ac.uk/QuickGO/GTerm?id=GO:0042220	[]
4	4	response to nerve growth factor	GO:1990089	0.00258	0.0239	0	0	0	0	Ep300|1;Eef2|1;Sh3gl2|1	3	115	126	53607	http://www.ebi.ac.uk/QuickGO/GTerm?id=GO:1990089	[]
3	3	regulation of localization	GO:0032879	0.00265	0.0244	0	0	0	0	Ywhaq|1;Ep300|1;Dbi|1;Cltc|1;Cyfip1|1;Idh2|1;Rock2|1;Lypla1|1;Gnao1|1;Sptbn1|1;Gnai1|1;Ppp3ca|1;Glud1|1;Abat|1;Anxa5|1;Ywhae|1;Cyb5r1|1;Hnrnpm|1;Sept5|1;Hsp90ab1|1;Atp5a1|1;Slc1a2|1;Rac1|1;Sh3gl2|1;Hspd1|1;Vsnl1|1;Calr|1	27	6586	126	53607	http://www.ebi.ac.uk/QuickGO/GTerm?id=GO:0032879	[]
4	4	protein localization	GO:0008104	0.00271	0.0249	0	0	0	0	Ywhaq|1;Ywhaz|1;Ep300|1;Ywhag|1;Cltc|1;Idh2|1;Rock2|1;Lypla1|1;Sptbn1|1;Gnai1|1;Ppp3ca|1;Glud1|1;Abat|1;Anxa5|1;Ywhae|1;H2afy2|1;Cyb5r1|1;Hnrnpm|1;Copa|1;Hsp90ab1|1;Rac1|1;Hspd1|1;Hspa9|1;Epb41l3|1;Vsnl1|1;Calr|1	26	6263	126	53607	http://www.ebi.ac.uk/QuickGO/GTerm?id=GO:0008104	[]
9	5,7,8,9	negative regulation of peptide secretion	GO:0002792	0.00271	0.0249	0	0	0	0	Ppp3ca|1;Anxa5|1;Vsnl1|1	3	117	126	53607	http://www.ebi.ac.uk/QuickGO/GTerm?id=GO:0002792	[]
7	6,7	regulation of protein localization to cell periphery	GO:1904375	0.0028	0.0255	0	0	0	0	Cltc|1;Lypla1|1;Sptbn1|1;Gnai1|1	4	246	126	53607	http://www.ebi.ac.uk/QuickGO/GTerm?id=GO:1904375	[]
2	2	cellular process	GO:0009987	0.00282	0.0257	0	0	0	0	Ywhaq|1;Cbx1|1;Ywhaz|1;Pabpc1|1;H2afz|1;Ep300|1;Dbi|1;Spta1|1;H2afj|1;Hnrnpa1|1;Taldo1|1;Atp5j|1;Sept11|1;Ywhag|1;Hbb-b1|1;Mcee|1;Afp|1;Tfam|1;Hmgn2|1;Hnrnpa2b1|1;Psat1|1;Cltc|1;Negr1|1;H3f3c|1;Slc25a3|1;Cyfip1|1;Jade3|1;Etfdh|1;Idh2|1;Atp5d|1;Rock2|1;Taf6|1;Aco2|1;Ppa2|1;Ptges3|1;Lrpprc|1;Lypla1|1;Aldh5a1|1;Clybl|1;Immt|1;Ldha|1;Atp5h|1;Acot9|1;Dnajc5|1;Ndufc2|1;Aldh1l1|1;Sdha|1;Prdx3|1;Gnao1|1;…	120	46868	126	53607	http://www.ebi.ac.uk/QuickGO/GTerm?id=GO:0009987	[]
6	6	cortical cytoskeleton organization	GO:0030865	0.00285	0.0258	0	0	0	0	Rock2|1;Epb41l3|1;Calr|1	3	119	126	53607	http://www.ebi.ac.uk/QuickGO/GTerm?id=GO:0030865	[]
9	5,6,7,8,9	protein secretion	GO:0009306	0.00285	0.0258	0	0	0	0	Ep300|1;Idh2|1;Sptbn1|1;Ppp3ca|1;Glud1|1;Abat|1;Anxa5|1;Hspd1|1;Vsnl1|1	9	1249	126	53607	http://www.ebi.ac.uk/QuickGO/GTerm?id=GO:0009306	[]
8	7,8	telomere maintenance via telomere lengthening	GO:0010833	0.00291	0.0263	0	0	0	0	Hnrnpa2b1|1;Ptges3|1;Hsp90ab1|1	3	120	126	53607	http://www.ebi.ac.uk/QuickGO/GTerm?id=GO:0010833	[]
6	5,6	cytosolic transport	GO:0016482	0.00293	0.0264	0	0	0	0	Ep300|1;Hnrnpa1|1;Cltc|1;Cyfip1|1;Lypla1|1;Ube2o|1;Sptbn1|1;Ppp3ca|1;Cyb5r1|1;Hsp90ab1|1;Hspa9|1;Calr|1	12	2018	126	53607	http://www.ebi.ac.uk/QuickGO/GTerm?id=GO:0016482	[]
4	4	reactive oxygen species biosynthetic process	GO:1903409	0.00305	0.0273	0	0	0	0	Ndufc2|1;Hsp90ab1|1;Ass1|1;Hspd1|1	4	252	126	53607	http://www.ebi.ac.uk/QuickGO/GTerm?id=GO:1903409	[]
7	7	monocarboxylic acid biosynthetic process	GO:0072330	0.00305	0.0273	0	0	0	0	Ptges3|1;Ldha|1;Decr2|1;Abat|1;Fam213b|1	5	414	126	53607	http://www.ebi.ac.uk/QuickGO/GTerm?id=GO:0072330	[]
7	6,7	regulation of gene expression, epigenetic	GO:0040029	0.00307	0.0274	0	0	0	0	H2afz|1;Ep300|1;H2afj|1;Hnrnpa2b1|1;Ppp3ca|1;H2afy2|1	6	601	126	53607	http://www.ebi.ac.uk/QuickGO/GTerm?id=GO:0040029	[]
6	6	positive regulation of cell size	GO:0045793	0.0031	0.0275	0	0	0	0	Ep300|1;Hsp90ab1|1	2	35	126	53607	http://www.ebi.ac.uk/QuickGO/GTerm?id=GO:0045793	[]
8	7,8	chaperone-mediated protein complex assembly	GO:0051131	0.0031	0.0275	0	0	0	0	Ptges3|1;Hsp90ab1|1	2	35	126	53607	http://www.ebi.ac.uk/QuickGO/GTerm?id=GO:0051131	[]
7	7	unsaturated fatty acid biosynthetic process	GO:0006636	0.00312	0.0276	0	0	0	0	Ptges3|1;Decr2|1;Fam213b|1	3	123	126	53607	http://www.ebi.ac.uk/QuickGO/GTerm?id=GO:0006636	[]
3	3	response to chemical	GO:0042221	0.00323	0.0285	0	0	0	0	Ywhaz|1;H2afz|1;Ep300|1;Hnrnpa1|1;Ywhag|1;Afp|1;Hnrnpa2b1|1;Cyfip1|1;Rock2|1;Ptges3|1;Prdx3|1;Gnao1|1;Ube2o|1;Gnai1|1;Ppp3ca|1;Hspa4l|1;Glud1|1;Got2|1;Abat|1;Atp2b1|1;Hba|1;Eef2|1;Anxa5|1;Pdk1|1;Cnp|1;Top1|1;Acat1|1;Hsp90ab1|1;Ass1|1;Slc1a2|1;Rac1|1;Sh3gl2|1;Hspd1|1;Hspa9|1;Calb1|1;Fam213b|1;Vsnl1|1;Calr|1	38	10547	126	53607	http://www.ebi.ac.uk/QuickGO/GTerm?id=GO:0042221	[]
6	5,6	gas transport	GO:0015669	0.00328	0.0288	0	0	0	0	Hbb-b1|1;Hba|1	2	36	126	53607	http://www.ebi.ac.uk/QuickGO/GTerm?id=GO:0015669	[]
7	7	gamma-aminobutyric acid transport	GO:0015812	0.00346	0.0303	0	0	0	0	Abat|1;Slc32a1|1	2	37	126	53607	http://www.ebi.ac.uk/QuickGO/GTerm?id=GO:0015812	[]
5	5	response to estradiol	GO:0032355	0.0035	0.0306	0	0	0	0	H2afz|1;Eef2|1;Ass1|1;Calr|1	4	262	126	53607	http://www.ebi.ac.uk/QuickGO/GTerm?id=GO:0032355	[]
2	2	behavior	GO:0007610	0.00354	0.0307	0	0	0	0	Ep300|1;Dbi|1;Negr1|1;Gnao1|1;Glud1|1;Abat|1;Cnp|1;Slc1a2|1;Rac1|1;Amph|1;Calb1|1;Calr|1	12	2066	126	53607	http://www.ebi.ac.uk/QuickGO/GTerm?id=GO:0007610	[]
7	5,6,7	regulation of plasma membrane organization	GO:1903729	0.00355	0.0307	0	0	0	0	Cltc|1;Lypla1|1;Sptbn1|1;Sh3gl2|1	4	263	126	53607	http://www.ebi.ac.uk/QuickGO/GTerm?id=GO:1903729	[]
9	8,9	ADP metabolic process	GO:0046031	0.00355	0.0307	0	0	0	0	Ldha|1;Eno1|1;Pdha1|1;Tpi1|1	4	263	126	53607	http://www.ebi.ac.uk/QuickGO/GTerm?id=GO:0046031	[]
8	4,5,7,8	negative regulation of secretion by cell	GO:1903531	0.00358	0.0309	0	0	0	0	Idh2|1;Ppp3ca|1;Abat|1;Anxa5|1;Vsnl1|1	5	430	126	53607	http://www.ebi.ac.uk/QuickGO/GTerm?id=GO:1903531	[]
6	5,6	glycerol metabolic process	GO:0006071	0.00365	0.0312	0	0	0	0	Gpd2|1;Tpi1|1	2	38	126	53607	http://www.ebi.ac.uk/QuickGO/GTerm?id=GO:0006071	[]
5	5	cellular carbohydrate catabolic process	GO:0044275	0.00365	0.0312	0	0	0	0	Gpd2|1;Pygb|1;Tpi1|1	3	130	126	53607	http://www.ebi.ac.uk/QuickGO/GTerm?id=GO:0044275	[]
4	4	organelle organization	GO:0006996	0.00365	0.0312	0	0	0	0	Ywhaz|1;H2afz|1;Ep300|1;Spta1|1;H2afj|1;Tfam|1;Hnrnpa2b1|1;Cltc|1;H3f3c|1;Cyfip1|1;Jade3|1;Rock2|1;Ptges3|1;Lrpprc|1;Immt|1;Ndufc2|1;Prdx3|1;Sptbn1|1;Gnai1|1;Uqcrb|1;Ndufa5|1;Anxa5|1;Pdk1|1;H2afy2|1;Pura|1;Cyb5r1|1;Cnp|1;Uqcr10|1;Top1|1;Ndufb4|1;Hsp90ab1|1;Rac1|1;Hspd1|1;Epb41l3|1;Mdh1|1;Calr|1	36	9894	126	53607	http://www.ebi.ac.uk/QuickGO/GTerm?id=GO:0006996	[]
10	5,7,8,9,10	regulation of peptide hormone secretion	GO:0090276	0.00388	0.033	0	0	0	0	Ppp3ca|1;Glud1|1;Abat|1;Anxa5|1;Vsnl1|1	5	438	126	53607	http://www.ebi.ac.uk/QuickGO/GTerm?id=GO:0090276	[]
7	6,7	regulation of intracellular protein transport	GO:0033157	0.00388	0.033	0	0	0	0	Ep300|1;Lypla1|1;Sptbn1|1;Ppp3ca|1;Ywhae|1;Cyb5r1|1;Hsp90ab1|1	7	842	126	53607	http://www.ebi.ac.uk/QuickGO/GTerm?id=GO:0033157	[]
7	7	fatty acid beta-oxidation	GO:0006635	0.00397	0.0337	0	0	0	0	Dbi|1;Etfdh|1;Acat1|1	3	134	126	53607	http://www.ebi.ac.uk/QuickGO/GTerm?id=GO:0006635	[]
4	4	regulation of synaptic plasticity	GO:0048167	0.00399	0.0337	0	0	0	0	Dbi|1;Ywhag|1;Syn1|1;Rac1|1;Calb1|1	5	441	126	53607	http://www.ebi.ac.uk/QuickGO/GTerm?id=GO:0048167	[]
7	6,7	metanephric nephron tubule development	GO:0072234	0.00403	0.0339	0	0	0	0	Acat1|1;Calb1|1	2	40	126	53607	http://www.ebi.ac.uk/QuickGO/GTerm?id=GO:0072234	[]
5	5	branched-chain amino acid metabolic process	GO:0009081	0.00403	0.0339	0	0	0	0	Mccc1|1;Acat1|1	2	40	126	53607	http://www.ebi.ac.uk/QuickGO/GTerm?id=GO:0009081	[]
8	8	cellular response to glucocorticoid stimulus	GO:0071385	0.00414	0.0346	0	0	0	0	Ep300|1;Atp2b1|1;Ass1|1	3	136	126	53607	http://www.ebi.ac.uk/QuickGO/GTerm?id=GO:0071385	[]
9	6,7,8,9	regulation of peptide secretion	GO:0002791	0.00414	0.0346	0	0	0	0	Ppp3ca|1;Glud1|1;Abat|1;Anxa5|1;Vsnl1|1	5	445	126	53607	http://www.ebi.ac.uk/QuickGO/GTerm?id=GO:0002791	[]
10	5,6,7,8,9,10	negative regulation of protein secretion	GO:0050709	0.00421	0.0351	0	0	0	0	Idh2|1;Ppp3ca|1;Anxa5|1;Vsnl1|1	4	276	126	53607	http://www.ebi.ac.uk/QuickGO/GTerm?id=GO:0050709	[]
4	4	protein refolding	GO:0042026	0.00423	0.0352	0	0	0	0	Ptges3|1;Hspd1|1	2	41	126	53607	http://www.ebi.ac.uk/QuickGO/GTerm?id=GO:0042026	[]
4	4	chaperone-mediated protein folding	GO:0061077	0.00431	0.0357	0	0	0	0	Ptges3|1;Hspd1|1;Calr|1	3	138	126	53607	http://www.ebi.ac.uk/QuickGO/GTerm?id=GO:0061077	[]
6	6	response to ethanol	GO:0045471	0.00437	0.0361	0	0	0	0	Ep300|1;Got2|1;Abat|1;Eef2|1	4	279	126	53607	http://www.ebi.ac.uk/QuickGO/GTerm?id=GO:0045471	[]
6	6	pentose-phosphate shunt	GO:0006098	0.00444	0.0361	0	0	0	0	Taldo1|1;Tpi1|1	2	42	126	53607	http://www.ebi.ac.uk/QuickGO/GTerm?id=GO:0006098	[]
5	4,5	alditol metabolic process	GO:0019400	0.00444	0.0361	0	0	0	0	Gpd2|1;Tpi1|1	2	42	126	53607	http://www.ebi.ac.uk/QuickGO/GTerm?id=GO:0019400	[]
7	7	cellular response to corticosteroid stimulus	GO:0071384	0.00449	0.0361	0	0	0	0	Ep300|1;Atp2b1|1;Ass1|1	3	140	126	53607	http://www.ebi.ac.uk/QuickGO/GTerm?id=GO:0071384	[]
5	5	response to peptide hormone	GO:0043434	0.00454	0.0361	0	0	0	0	H2afz|1;Ywhag|1;Cyfip1|1;Rock2|1;Got2|1;Anxa5|1;Ass1|1	7	867	126	53607	http://www.ebi.ac.uk/QuickGO/GTerm?id=GO:0043434	[]
8	8	purine ribonucleoside diphosphate metabolic process	GO:0009179	0.00466	0.0361	0	0	0	0	Ldha|1;Eno1|1;Pdha1|1;Tpi1|1	4	284	126	53607	http://www.ebi.ac.uk/QuickGO/GTerm?id=GO:0009179	[]
7	7	purine nucleoside diphosphate metabolic process	GO:0009135	0.00466	0.0361	0	0	0	0	Ldha|1;Eno1|1;Pdha1|1;Tpi1|1	4	284	126	53607	http://www.ebi.ac.uk/QuickGO/GTerm?id=GO:0009135	[]
6	6	peptide antigen assembly with MHC class I protein complex	GO:0002502	0.0047	0.0361	0	0	0	0	Calr|1	1	2	126	53607	http://www.ebi.ac.uk/QuickGO/GTerm?id=GO:0002502	[]
5	5	positive regulation of muscle atrophy	GO:0014737	0.0047	0.0361	0	0	0	0	Ep300|1	1	2	126	53607	http://www.ebi.ac.uk/QuickGO/GTerm?id=GO:0014737	[]
5	5	glyoxylate cycle	GO:0006097	0.0047	0.0361	0	0	0	0	Idh2|1	1	2	126	53607	http://www.ebi.ac.uk/QuickGO/GTerm?id=GO:0006097	[]
7	6,7	protein import into mitochondrial intermembrane space	GO:0045041	0.0047	0.0361	0	0	0	0	Hspd1|1	1	2	126	53607	http://www.ebi.ac.uk/QuickGO/GTerm?id=GO:0045041	[]
9	6,7,8,9	negative regulation of miRNA metabolic process	GO:2000629	0.0047	0.0361	0	0	0	0	Ep300|1	1	2	126	53607	http://www.ebi.ac.uk/QuickGO/GTerm?id=GO:2000629	[]
7	6,7	glycine betaine biosynthetic process	GO:0031456	0.0047	0.0361	0	0	0	0	Aldh7a1|1	1	2	126	53607	http://www.ebi.ac.uk/QuickGO/GTerm?id=GO:0031456	[]
8	7,8	proximal convoluted tubule development	GO:0072019	0.0047	0.0361	0	0	0	0	Acat1|1	1	2	126	53607	http://www.ebi.ac.uk/QuickGO/GTerm?id=GO:0072019	[]
5	5	glycine betaine biosynthetic process from choline	GO:0019285	0.0047	0.0361	0	0	0	0	Aldh7a1|1	1	2	126	53607	http://www.ebi.ac.uk/QuickGO/GTerm?id=GO:0019285	[]
7	6,7	positive regulation of cell volume	GO:0045795	0.0047	0.0361	0	0	0	0	Slc12a2|1	1	2	126	53607	http://www.ebi.ac.uk/QuickGO/GTerm?id=GO:0045795	[]
5	5	glycine betaine metabolic process	GO:0031455	0.0047	0.0361	0	0	0	0	Aldh7a1|1	1	2	126	53607	http://www.ebi.ac.uk/QuickGO/GTerm?id=GO:0031455	[]
11	7,8,9,10,11	regulation of matrix metallopeptidase secretion	GO:1904464	0.0047	0.0361	0	0	0	0	Idh2|1	1	2	126	53607	http://www.ebi.ac.uk/QuickGO/GTerm?id=GO:1904464	[]
5	5	nor-spermidine metabolic process	GO:0046204	0.0047	0.0361	0	0	0	0	Sat2|1	1	2	126	53607	http://www.ebi.ac.uk/QuickGO/GTerm?id=GO:0046204	[]
10	6,7,8,9,10	matrix metallopeptidase secretion	GO:1990773	0.0047	0.0361	0	0	0	0	Idh2|1	1	2	126	53607	http://www.ebi.ac.uk/QuickGO/GTerm?id=GO:1990773	[]
7	5,7	negative regulation of transforming growth factor beta activation	GO:1901389	0.0047	0.0361	0	0	0	0	Hsp90ab1|1	1	2	126	53607	http://www.ebi.ac.uk/QuickGO/GTerm?id=GO:1901389	[]
12	8,9,12	histone H2B acetylation	GO:0043969	0.0047	0.0361	0	0	0	0	Ep300|1	1	2	126	53607	http://www.ebi.ac.uk/QuickGO/GTerm?id=GO:0043969	[]
8	7,8	metanephric proximal convoluted tubule development	GO:0072229	0.0047	0.0361	0	0	0	0	Acat1|1	1	2	126	53607	http://www.ebi.ac.uk/QuickGO/GTerm?id=GO:0072229	[]
7	5,7	regulation of transforming growth factor beta activation	GO:1901388	0.0047	0.0361	0	0	0	0	Hsp90ab1|1	1	2	126	53607	http://www.ebi.ac.uk/QuickGO/GTerm?id=GO:1901388	[]
8	5,7,8	acetyl-CoA catabolic process	GO:0046356	0.0047	0.0361	0	0	0	0	Acat1|1	1	2	126	53607	http://www.ebi.ac.uk/QuickGO/GTerm?id=GO:0046356	[]
9	6,9	spermine acetylation	GO:0032919	0.0047	0.0361	0	0	0	0	Sat2|1	1	2	126	53607	http://www.ebi.ac.uk/QuickGO/GTerm?id=GO:0032919	[]
8	6,8	gamma-aminobutyric acid catabolic process	GO:0009450	0.0047	0.0361	0	0	0	0	Aldh5a1|1	1	2	126	53607	http://www.ebi.ac.uk/QuickGO/GTerm?id=GO:0009450	[]
6	6	putrescine acetylation	GO:0032920	0.0047	0.0361	0	0	0	0	Sat2|1	1	2	126	53607	http://www.ebi.ac.uk/QuickGO/GTerm?id=GO:0032920	[]
8	4,5,7,8	positive regulation of secretion by cell	GO:1903532	0.00471	0.0361	0	0	0	0	Ep300|1;Sptbn1|1;Glud1|1;Abat|1;Sept5|1;Hspd1|1;Vsnl1|1	7	873	126	53607	http://www.ebi.ac.uk/QuickGO/GTerm?id=GO:1903532	[]
4	4	organic substance catabolic process	GO:1901575	0.00476	0.0363	0	0	0	0	Pabpc1|1;Dbi|1;Etfdh|1;Lrpprc|1;Lypla1|1;Aldh5a1|1;Ldha|1;Aldh1l1|1;Gpd2|1;Glud1|1;Got2|1;Eno1|1;Pygb|1;Mccc1|1;Cnp|1;Acat1|1;Sat2|1;Hsp90ab1|1;Pdha1|1;Tpi1|1	20	4550	126	53607	http://www.ebi.ac.uk/QuickGO/GTerm?id=GO:1901575	[]
5	5	response to reactive oxygen species	GO:0000302	0.00476	0.0363	0	0	0	0	Ep300|1;Prdx3|1;Gnao1|1;Eef2|1;Hspd1|1	5	460	126	53607	http://www.ebi.ac.uk/QuickGO/GTerm?id=GO:0000302	[]
4	4	cellular oxidant detoxification	GO:0098869	0.00495	0.0376	0	0	0	0	Prdx3|1;Hba|1;Fam213b|1	3	145	126	53607	http://www.ebi.ac.uk/QuickGO/GTerm?id=GO:0098869	[]
7	7	ribonucleoside diphosphate metabolic process	GO:0009185	0.00501	0.038	0	0	0	0	Ldha|1;Eno1|1;Pdha1|1;Tpi1|1	4	290	126	53607	http://www.ebi.ac.uk/QuickGO/GTerm?id=GO:0009185	[]
12	6,7,9,10,11,12	positive regulation of insulin secretion	GO:0032024	0.00504	0.0381	0	0	0	0	Glud1|1;Abat|1;Vsnl1|1	3	146	126	53607	http://www.ebi.ac.uk/QuickGO/GTerm?id=GO:0032024	[]
5	5	metanephric tubule development	GO:0072170	0.00508	0.0381	0	0	0	0	Acat1|1;Calb1|1	2	45	126	53607	http://www.ebi.ac.uk/QuickGO/GTerm?id=GO:0072170	[]
5	5	cofactor catabolic process	GO:0051187	0.00508	0.0381	0	0	0	0	Aldh1l1|1;Acat1|1	2	45	126	53607	http://www.ebi.ac.uk/QuickGO/GTerm?id=GO:0051187	[]
10	7,8,9,10	regulation of protein import into nucleus, translocation	GO:0033158	0.00508	0.0381	0	0	0	0	Ep300|1;Hsp90ab1|1	2	45	126	53607	http://www.ebi.ac.uk/QuickGO/GTerm?id=GO:0033158	[]
3	3	cellular detoxification	GO:1990748	0.00514	0.0385	0	0	0	0	Prdx3|1;Hba|1;Fam213b|1	3	147	126	53607	http://www.ebi.ac.uk/QuickGO/GTerm?id=GO:1990748	[]
8	4,7,8	positive regulation of protein localization to nucleus	GO:1900182	0.00526	0.0392	0	0	0	0	Ep300|1;Ppp3ca|1;Hnrnpm|1;Hsp90ab1|1	4	294	126	53607	http://www.ebi.ac.uk/QuickGO/GTerm?id=GO:1900182	[]
5	5	glyceraldehyde-3-phosphate metabolic process	GO:0019682	0.0053	0.0395	0	0	0	0	Taldo1|1;Tpi1|1	2	46	126	53607	http://www.ebi.ac.uk/QuickGO/GTerm?id=GO:0019682	[]
6	5,6	secretion	GO:0046903	0.00548	0.0407	0	0	0	0	Ywhaz|1;Ep300|1;Idh2|1;Sptbn1|1;Ppp3ca|1;Glud1|1;Got2|1;Abat|1;Anxa5|1;Syn1|1;Sept5|1;Copa|1;Hspd1|1;Vsnl1|1	14	2758	126	53607	http://www.ebi.ac.uk/QuickGO/GTerm?id=GO:0046903	[]
5	3,5	adhesion of symbiont to host	GO:0044406	0.00553	0.0409	0	0	0	0	Hsp90ab1|1;Hspd1|1	2	47	126	53607	http://www.ebi.ac.uk/QuickGO/GTerm?id=GO:0044406	[]
5	5	regulation of cell size	GO:0008361	0.00553	0.0409	0	0	0	0	Ep300|1;Cyfip1|1;Hsp90ab1|1;Rac1|1;Slc12a2|1	5	477	126	53607	http://www.ebi.ac.uk/QuickGO/GTerm?id=GO:0008361	[]
5	5	peptide metabolic process	GO:0006518	0.00563	0.0414	0	0	0	0	Ep300|1;Hbb-b1|1;Hnrnpa2b1|1;Cyfip1|1;Rock2|1;Lrpprc|1;Aldh5a1|1;Ppp3ca|1;Eef2|1;Pura|1;Oplah|1;Calr|1	12	2192	126	53607	http://www.ebi.ac.uk/QuickGO/GTerm?id=GO:0006518	[]
8	6,7,8	regulation of protein localization to nucleus	GO:1900180	0.00563	0.0414	0	0	0	0	Ep300|1;Sptbn1|1;Ppp3ca|1;Hnrnpm|1;Hsp90ab1|1	5	479	126	53607	http://www.ebi.ac.uk/QuickGO/GTerm?id=GO:1900180	[]
5	5	cellular amine metabolic process	GO:0044106	0.00571	0.0418	0	0	0	0	Dbi|1;Abat|1;Aldh7a1|1;Sat2|1	4	301	126	53607	http://www.ebi.ac.uk/QuickGO/GTerm?id=GO:0044106	[]
6	6	coenzyme A metabolic process	GO:0015936	0.00576	0.0421	0	0	0	0	Mcee|1;Acat1|1	2	48	126	53607	http://www.ebi.ac.uk/QuickGO/GTerm?id=GO:0015936	[]
8	7,8	nuclear import	GO:0051170	0.00588	0.0429	0	0	0	0	Ep300|1;Hnrnpa1|1;Sptbn1|1;Ppp3ca|1;Hsp90ab1|1	5	484	126	53607	http://www.ebi.ac.uk/QuickGO/GTerm?id=GO:0051170	[]
4	4	response to extracellular stimulus	GO:0009991	0.00594	0.0432	0	0	0	0	Ldha|1;Atp2b1|1;Eef2|1;Anxa5|1;Pdk1|1;Acat1|1;Ass1|1;Slc1a2|1;Mdh1|1	9	1399	126	53607	http://www.ebi.ac.uk/QuickGO/GTerm?id=GO:0009991	[]
6	6	metanephric nephron epithelium development	GO:0072243	0.006	0.0435	0	0	0	0	Acat1|1;Calb1|1	2	49	126	53607	http://www.ebi.ac.uk/QuickGO/GTerm?id=GO:0072243	[]
6	4,6	negative regulation of ion transport	GO:0043271	0.00604	0.0437	0	0	0	0	Ywhaq|1;Gnao1|1;Abat|1;Ywhae|1	4	306	126	53607	http://www.ebi.ac.uk/QuickGO/GTerm?id=GO:0043271	[]
8	5,7,8	regulation of secretion by cell	GO:1903530	0.00605	0.0437	0	0	0	0	Ep300|1;Idh2|1;Sptbn1|1;Ppp3ca|1;Glud1|1;Abat|1;Anxa5|1;Sept5|1;Hspd1|1;Vsnl1|1	10	1664	126	53607	http://www.ebi.ac.uk/QuickGO/GTerm?id=GO:1903530	[]
4	4	cellular aldehyde metabolic process	GO:0006081	0.00606	0.0437	0	0	0	0	Taldo1|1;Idh2|1;Tpi1|1	3	156	126	53607	http://www.ebi.ac.uk/QuickGO/GTerm?id=GO:0006081	[]
7	4,6,7	negative regulation of secretion	GO:0051048	0.00613	0.0441	0	0	0	0	Idh2|1;Ppp3ca|1;Abat|1;Anxa5|1;Vsnl1|1	5	489	126	53607	http://www.ebi.ac.uk/QuickGO/GTerm?id=GO:0051048	[]
6	5,6	chaperone mediated protein folding requiring cofactor	GO:0051085	0.00624	0.0447	0	0	0	0	Ptges3|1;Hspd1|1	2	50	126	53607	http://www.ebi.ac.uk/QuickGO/GTerm?id=GO:0051085	[]
7	5,6,7	positive regulation of cellular amide metabolic process	GO:0034250	0.00625	0.0447	0	0	0	0	Ep300|1;Rock2|1;Ppp3ca|1;Eef2|1	4	309	126	53607	http://www.ebi.ac.uk/QuickGO/GTerm?id=GO:0034250	[]
3	3	cellular component organization	GO:0016043	0.00626	0.0447	0	0	0	0	Ywhaz|1;H2afz|1;Ep300|1;Spta1|1;H2afj|1;Sept11|1;Tfam|1;Hnrnpa2b1|1;Cltc|1;Negr1|1;H3f3c|1;Cyfip1|1;Jade3|1;Rock2|1;Ptges3|1;Lrpprc|1;Lypla1|1;Aldh5a1|1;Clybl|1;Immt|1;Ndufc2|1;Prdx3|1;Gnao1|1;Sptbn1|1;Gnai1|1;Ppp3ca|1;Uqcrb|1;Ndufa5|1;Anxa5|1;Pdk1|1;Iba57|1;H2afy2|1;Pura|1;Atp6v0a1|1;Cyb5r1|1;Cnp|1;Uqcr10|1;Top1|1;Anxa6|1;Ndufb4|1;Acat1|1;Hsp90ab1|1;Slc1a2|1;Rac1|1;Sh3gl2|1;Hspd1|1;Hspa9|1;Slc12…	51	15915	126	53607	http://www.ebi.ac.uk/QuickGO/GTerm?id=GO:0016043	[]
7	4,5,7	negative regulation of hormone secretion	GO:0046888	0.00627	0.0447	0	0	0	0	Ppp3ca|1;Anxa5|1;Vsnl1|1	3	158	126	53607	http://www.ebi.ac.uk/QuickGO/GTerm?id=GO:0046888	[]
8	7,8	protein homooligomerization	GO:0051260	0.00634	0.0451	0	0	0	0	Aldh5a1|1;Clybl|1;Anxa5|1;Anxa6|1;Acat1|1;Slc1a2|1	6	699	126	53607	http://www.ebi.ac.uk/QuickGO/GTerm?id=GO:0051260	[]
7	7	response to glucocorticoid	GO:0051384	0.00646	0.0458	0	0	0	0	Ep300|1;Atp2b1|1;Ass1|1;Hspd1|1	4	312	126	53607	http://www.ebi.ac.uk/QuickGO/GTerm?id=GO:0051384	[]
8	6,7,8	protein export from nucleus	GO:0006611	0.0065	0.0459	0	0	0	0	Ywhae|1;Hspa9|1;Calr|1	3	160	126	53607	http://www.ebi.ac.uk/QuickGO/GTerm?id=GO:0006611	[]
6	6	hormone secretion	GO:0046879	0.00651	0.0459	0	0	0	0	Ywhaz|1;Ppp3ca|1;Glud1|1;Abat|1;Anxa5|1;Vsnl1|1	6	703	126	53607	http://www.ebi.ac.uk/QuickGO/GTerm?id=GO:0046879	[]
6	6	neurogenesis	GO:0022008	0.00655	0.0461	0	0	0	0	Ep300|1;Dbi|1;Ywhag|1;Negr1|1;Cyfip1|1;Idh2|1;Rock2|1;Gnao1|1;Ppp3ca|1;Eef2|1;Ywhae|1;Syn1|1;Psd3|1;Cnp|1;Hsp90ab1|1;Rac1|1;Sh3gl2|1;Epb41l3|1;Calr|1	19	4363	126	53607	http://www.ebi.ac.uk/QuickGO/GTerm?id=GO:0022008	[]
7	4,6,7	positive regulation of secretion	GO:0051047	0.00666	0.0468	0	0	0	0	Ep300|1;Sptbn1|1;Glud1|1;Abat|1;Sept5|1;Hspd1|1;Vsnl1|1	7	932	126	53607	http://www.ebi.ac.uk/QuickGO/GTerm?id=GO:0051047	[]
6	6	cellular response to lipid	GO:0071396	0.00669	0.0468	0	0	0	0	H2afz|1;Ep300|1;Rock2|1;Ptges3|1;Gnai1|1;Atp2b1|1;Ass1|1;Calr|1	8	1173	126	53607	http://www.ebi.ac.uk/QuickGO/GTerm?id=GO:0071396	[]
7	4,6,7	negative regulation of protein transport	GO:0051224	0.00672	0.0469	0	0	0	0	Idh2|1;Lypla1|1;Ppp3ca|1;Anxa5|1;Vsnl1|1	5	500	126	53607	http://www.ebi.ac.uk/QuickGO/GTerm?id=GO:0051224	[]
6	6	protein localization to organelle	GO:0033365	0.00683	0.0476	0	0	0	0	Ywhaz|1;Ep300|1;Rock2|1;Sptbn1|1;Ppp3ca|1;H2afy2|1;Cyb5r1|1;Hnrnpm|1;Hsp90ab1|1;Hspd1|1;Calr|1	11	1967	126	53607	http://www.ebi.ac.uk/QuickGO/GTerm?id=GO:0033365	[]
5	5	cellular response to drug	GO:0035690	0.00695	0.0476	0	0	0	0	Ep300|1;Ppp3ca|1;Hsp90ab1|1	3	164	126	53607	http://www.ebi.ac.uk/QuickGO/GTerm?id=GO:0035690	[]
4	4	lipid metabolic process	GO:0006629	0.00699	0.0476	0	0	0	0	Dbi|1;Afp|1;Etfdh|1;Ptges3|1;Lypla1|1;Aldh5a1|1;Decr2|1;Pdk1|1;Sptlc3|1;Dld|1;Cyb5r1|1;Acat1|1;Atp5a1|1;Rac1|1;Fam213b|1	15	3139	126	53607	http://www.ebi.ac.uk/QuickGO/GTerm?id=GO:0006629	[]
9	9	glutamate catabolic process to 2-oxoglutarate	GO:0019551	0.00703	0.0476	0	0	0	0	Got2|1	1	3	126	53607	http://www.ebi.ac.uk/QuickGO/GTerm?id=GO:0019551	[]
8	7,8	metanephric proximal tubule development	GO:0072237	0.00703	0.0476	0	0	0	0	Acat1|1	1	3	126	53607	http://www.ebi.ac.uk/QuickGO/GTerm?id=GO:0072237	[]
9	9	glutamate decarboxylation to succinate	GO:0006540	0.00703	0.0476	0	0	0	0	Aldh5a1|1	1	3	126	53607	http://www.ebi.ac.uk/QuickGO/GTerm?id=GO:0006540	[]
7	5,6,7	B cell cytokine production	GO:0002368	0.00703	0.0476	0	0	0	0	Hspd1|1	1	3	126	53607	http://www.ebi.ac.uk/QuickGO/GTerm?id=GO:0002368	[]
7	6,7	miRNA transport	GO:1990428	0.00703	0.0476	0	0	0	0	Hnrnpa2b1|1	1	3	126	53607	http://www.ebi.ac.uk/QuickGO/GTerm?id=GO:1990428	[]
9	7,9	cellular response to corticosterone stimulus	GO:0071386	0.00703	0.0476	0	0	0	0	Atp2b1|1	1	3	126	53607	http://www.ebi.ac.uk/QuickGO/GTerm?id=GO:0071386	[]
6	6	glyceraldehyde-3-phosphate biosynthetic process	GO:0046166	0.00703	0.0476	0	0	0	0	Tpi1|1	1	3	126	53607	http://www.ebi.ac.uk/QuickGO/GTerm?id=GO:0046166	[]
10	8,9,10	glutamate catabolic process to aspartate	GO:0019550	0.00703	0.0476	0	0	0	0	Got2|1	1	3	126	53607	http://www.ebi.ac.uk/QuickGO/GTerm?id=GO:0019550	[]
8	6,8	positive regulation of cardiac muscle hypertrophy in response to stress	GO:1903244	0.00703	0.0476	0	0	0	0	Ppp3ca|1	1	3	126	53607	http://www.ebi.ac.uk/QuickGO/GTerm?id=GO:1903244	[]
6	5,6	positive regulation of cardiac muscle adaptation	GO:0010615	0.00703	0.0476	0	0	0	0	Ppp3ca|1	1	3	126	53607	http://www.ebi.ac.uk/QuickGO/GTerm?id=GO:0010615	[]
9	8,9	MHC class I protein complex assembly	GO:0002397	0.00703	0.0476	0	0	0	0	Calr|1	1	3	126	53607	http://www.ebi.ac.uk/QuickGO/GTerm?id=GO:0002397	[]
4	4	cellular response to endogenous stimulus	GO:0071495	0.00709	0.0478	0	0	0	0	H2afz|1;Ep300|1;Ywhag|1;Cyfip1|1;Rock2|1;Ptges3|1;Ube2o|1;Atp2b1|1;Eef2|1;Anxa5|1;Hsp90ab1|1;Ass1|1;Sh3gl2|1;Calr|1	14	2843	126	53607	http://www.ebi.ac.uk/QuickGO/GTerm?id=GO:0071495	[]
7	5,6,7	protein import	GO:0017038	0.0071	0.0478	0	0	0	0	Ep300|1;Sptbn1|1;Ppp3ca|1;Hnrnpm|1;Hsp90ab1|1;Hspd1|1	6	716	126	53607	http://www.ebi.ac.uk/QuickGO/GTerm?id=GO:0017038	[]
5	5	regulation of mitochondrial membrane potential	GO:0051881	0.00719	0.0482	0	0	0	0	Ppa2|1;Ndufc2|1;Prdx3|1	3	166	126	53607	http://www.ebi.ac.uk/QuickGO/GTerm?id=GO:0051881	[]
5	5	regulation of peptide transport	GO:0090087	0.00723	0.0482	0	0	0	0	Ppp3ca|1;Glud1|1;Abat|1;Anxa5|1;Vsnl1|1	5	509	126	53607	http://www.ebi.ac.uk/QuickGO/GTerm?id=GO:0090087	[]
9	8,9	prostaglandin biosynthetic process	GO:0001516	0.00724	0.0482	0	0	0	0	Ptges3|1;Fam213b|1	2	54	126	53607	http://www.ebi.ac.uk/QuickGO/GTerm?id=GO:0001516	[]
7	7	response to mineralocorticoid	GO:0051385	0.00724	0.0482	0	0	0	0	Ep300|1;Atp2b1|1	2	54	126	53607	http://www.ebi.ac.uk/QuickGO/GTerm?id=GO:0051385	[]
8	7,8	prostanoid biosynthetic process	GO:0046457	0.00724	0.0482	0	0	0	0	Ptges3|1;Fam213b|1	2	54	126	53607	http://www.ebi.ac.uk/QuickGO/GTerm?id=GO:0046457	[]
2	2	detoxification	GO:0098754	0.0073	0.0485	0	0	0	0	Prdx3|1;Hba|1;Fam213b|1	3	167	126	53607	http://www.ebi.ac.uk/QuickGO/GTerm?id=GO:0098754	[]
7	6,7	protein localization to plasma membrane	GO:0072659	0.00738	0.0489	0	0	0	0	Cltc|1;Rock2|1;Lypla1|1;Sptbn1|1;Rac1|1;Epb41l3|1	6	722	126	53607	http://www.ebi.ac.uk/QuickGO/GTerm?id=GO:0072659	[]
7	6,7	protein oligomerization	GO:0051259	0.0074	0.0489	0	0	0	0	Ep300|1;Sept11|1;Aldh5a1|1;Clybl|1;Anxa5|1;Anxa6|1;Acat1|1;Slc1a2|1	8	1194	126	53607	http://www.ebi.ac.uk/QuickGO/GTerm?id=GO:0051259	[]
7	6,7	metanephric epithelium development	GO:0072207	0.0075	0.0493	0	0	0	0	Acat1|1;Calb1|1	2	55	126	53607	http://www.ebi.ac.uk/QuickGO/GTerm?id=GO:0072207	[]
6	5,6	negative regulation of cell cycle arrest	GO:0071157	0.0075	0.0493	0	0	0	0	Hsp90ab1|1;Calr|1	2	55	126	53607	http://www.ebi.ac.uk/QuickGO/GTerm?id=GO:0071157	[]
5	5	hyperosmotic response	GO:0006972	0.0075	0.0493	0	0	0	0	Rac1|1;Slc12a2|1	2	55	126	53607	http://www.ebi.ac.uk/QuickGO/GTerm?id=GO:0006972	[]
6	5,6	hormone transport	GO:0009914	0.00757	0.0496	0	0	0	0	Ywhaz|1;Ppp3ca|1;Glud1|1;Abat|1;Anxa5|1;Vsnl1|1	6	726	126	53607	http://www.ebi.ac.uk/QuickGO/GTerm?id=GO:0009914	[]
5	5	cellular response to oxygen-containing compound	GO:1901701	0.0076	0.0497	0	0	0	0	H2afz|1;Ep300|1;Ywhag|1;Cyfip1|1;Rock2|1;Prdx3|1;Gnai1|1;Ppp3ca|1;Atp2b1|1;Anxa5|1;Ass1|1;Vsnl1|1	12	2280	126	53607	http://www.ebi.ac.uk/QuickGO/GTerm?id=GO:1901701	[]
7	5,6,7	positive regulation of DNA metabolic process	GO:0051054	0.00776	0.0505	0	0	0	0	Hnrnpa2b1|1;Ptges3|1;Hsp90ab1|1;Rac1|1;Calr|1	5	518	126	53607	http://www.ebi.ac.uk/QuickGO/GTerm?id=GO:0051054	[]
9	7,9	glutamine family amino acid biosynthetic process	GO:0009084	0.00777	0.0505	0	0	0	0	Glud1|1;Ass1|1	2	56	126	53607	http://www.ebi.ac.uk/QuickGO/GTerm?id=GO:0009084	[]
5	5	amine metabolic process	GO:0009308	0.00801	0.052	0	0	0	0	Dbi|1;Abat|1;Aldh7a1|1;Sat2|1	4	332	126	53607	http://www.ebi.ac.uk/QuickGO/GTerm?id=GO:0009308	[]
9	8,9	rRNA transcription	GO:0009303	0.00804	0.052	0	0	0	0	H2afy2|1;Top1|1	2	57	126	53607	http://www.ebi.ac.uk/QuickGO/GTerm?id=GO:0009303	[]
9	7,8,9	positive regulation of telomerase activity	GO:0051973	0.00804	0.052	0	0	0	0	Ptges3|1;Hsp90ab1|1	2	57	126	53607	http://www.ebi.ac.uk/QuickGO/GTerm?id=GO:0051973	[]
6	6	response to corticosteroid	GO:0031960	0.00809	0.0522	0	0	0	0	Ep300|1;Atp2b1|1;Ass1|1;Hspd1|1	4	333	126	53607	http://www.ebi.ac.uk/QuickGO/GTerm?id=GO:0031960	[]
5	5	'de novo' posttranslational protein folding	GO:0051084	0.00831	0.0535	0	0	0	0	Ptges3|1;Hspd1|1	2	58	126	53607	http://www.ebi.ac.uk/QuickGO/GTerm?id=GO:0051084	[]
8	8	clathrin-mediated endocytosis	GO:0072583	0.00843	0.0541	0	0	0	0	Cltc|1;Sh3gl2|1;Amph|1	3	176	126	53607	http://www.ebi.ac.uk/QuickGO/GTerm?id=GO:0072583	[]
7	5,6,7	establishment of protein localization to organelle	GO:0072594	0.00881	0.0564	0	0	0	0	Ywhaz|1;Ep300|1;Sptbn1|1;Ppp3ca|1;H2afy2|1;Cyb5r1|1;Hsp90ab1|1;Hspd1|1	8	1231	126	53607	http://www.ebi.ac.uk/QuickGO/GTerm?id=GO:0072594	[]
6	5,6	iron-sulfur cluster assembly	GO:0016226	0.00887	0.0565	0	0	0	0	Iba57|1;Hspa9|1	2	60	126	53607	http://www.ebi.ac.uk/QuickGO/GTerm?id=GO:0016226	[]
5	4,5	neurotransmitter metabolic process	GO:0042133	0.00887	0.0565	0	0	0	0	Aldh5a1|1;Abat|1	2	60	126	53607	http://www.ebi.ac.uk/QuickGO/GTerm?id=GO:0042133	[]
5	5	metallo-sulfur cluster assembly	GO:0031163	0.00887	0.0565	0	0	0	0	Iba57|1;Hspa9|1	2	60	126	53607	http://www.ebi.ac.uk/QuickGO/GTerm?id=GO:0031163	[]
6	5,6	cellular chemical homeostasis	GO:0055082	0.009	0.0565	0	0	0	0	Ep300|1;Dbi|1;Immt|1;Ppp3ca|1;Atp2b1|1;Ywhae|1;Atp6v0a1|1;Anxa6|1;Calb1|1;Vsnl1|1	10	1766	126	53607	http://www.ebi.ac.uk/QuickGO/GTerm?id=GO:0055082	[]
4	4	regulation of cellular component size	GO:0032535	0.00907	0.0565	0	0	0	0	Ep300|1;Spta1|1;Cyfip1|1;Sptbn1|1;Hsp90ab1|1;Rac1|1;Slc12a2|1	7	989	126	53607	http://www.ebi.ac.uk/QuickGO/GTerm?id=GO:0032535	[]
9	8,9	protein homotrimerization	GO:0070207	0.00916	0.0565	0	0	0	0	Clybl|1;Slc1a2|1	2	61	126	53607	http://www.ebi.ac.uk/QuickGO/GTerm?id=GO:0070207	[]
8	7,8	cytochrome complex assembly	GO:0017004	0.00916	0.0565	0	0	0	0	Uqcrb|1;Uqcr10|1	2	61	126	53607	http://www.ebi.ac.uk/QuickGO/GTerm?id=GO:0017004	[]
5	5	cognition	GO:0050890	0.00919	0.0565	0	0	0	0	Ep300|1;Dbi|1;Cyfip1|1;Glud1|1;Amph|1;Calb1|1	6	757	126	53607	http://www.ebi.ac.uk/QuickGO/GTerm?id=GO:0050890	[]
6	6	nucleoside diphosphate metabolic process	GO:0009132	0.00922	0.0565	0	0	0	0	Ldha|1;Eno1|1;Pdha1|1;Tpi1|1	4	346	126	53607	http://www.ebi.ac.uk/QuickGO/GTerm?id=GO:0009132	[]
3	3	response to estrogen	GO:0043627	0.00931	0.0565	0	0	0	0	H2afz|1;Ep300|1;Hspd1|1;Calr|1	4	347	126	53607	http://www.ebi.ac.uk/QuickGO/GTerm?id=GO:0043627	[]
7	6,7	folic acid-containing compound catabolic process	GO:0009397	0.00937	0.0565	0	0	0	0	Aldh1l1|1	1	4	126	53607	http://www.ebi.ac.uk/QuickGO/GTerm?id=GO:0009397	[]
8	5,6,8	argininosuccinate metabolic process	GO:0000053	0.00937	0.0565	0	0	0	0	Ass1|1	1	4	126	53607	http://www.ebi.ac.uk/QuickGO/GTerm?id=GO:0000053	[]
9	6,7,9	negative regulation of synaptic vesicle recycling	GO:1903422	0.00937	0.0565	0	0	0	0	Cyfip1|1	1	4	126	53607	http://www.ebi.ac.uk/QuickGO/GTerm?id=GO:1903422	[]
10	5,6,8,9,10	regulation of eIF2 alpha phosphorylation by heme	GO:0010999	0.00937	0.0565	0	0	0	0	Hbb-b1|1	1	4	126	53607	http://www.ebi.ac.uk/QuickGO/GTerm?id=GO:0010999	[]
5	5	peptidyl-cysteine oxidation	GO:0018171	0.00937	0.0565	0	0	0	0	Prdx3|1	1	4	126	53607	http://www.ebi.ac.uk/QuickGO/GTerm?id=GO:0018171	[]
9	7,9	leucine catabolic process	GO:0006552	0.00937	0.0565	0	0	0	0	Mccc1|1	1	4	126	53607	http://www.ebi.ac.uk/QuickGO/GTerm?id=GO:0006552	[]
8	5,7,8	negative regulation of gamma-aminobutyric acid secretion	GO:0014053	0.00937	0.0565	0	0	0	0	Abat|1	1	4	126	53607	http://www.ebi.ac.uk/QuickGO/GTerm?id=GO:0014053	[]
7	6,7	embryonic olfactory bulb interneuron precursor migration	GO:0021831	0.00937	0.0565	0	0	0	0	Rac1|1	1	4	126	53607	http://www.ebi.ac.uk/QuickGO/GTerm?id=GO:0021831	[]
9	7,8,9	10-formyltetrahydrofolate catabolic process	GO:0009258	0.00937	0.0565	0	0	0	0	Aldh1l1|1	1	4	126	53607	http://www.ebi.ac.uk/QuickGO/GTerm?id=GO:0009258	[]
6	6	putrescine catabolic process	GO:0009447	0.00937	0.0565	0	0	0	0	Sat2|1	1	4	126	53607	http://www.ebi.ac.uk/QuickGO/GTerm?id=GO:0009447	[]
8	8	aspartate biosynthetic process	GO:0006532	0.00937	0.0565	0	0	0	0	Got2|1	1	4	126	53607	http://www.ebi.ac.uk/QuickGO/GTerm?id=GO:0006532	[]
9	8,9	aspartate catabolic process	GO:0006533	0.00937	0.0565	0	0	0	0	Got2|1	1	4	126	53607	http://www.ebi.ac.uk/QuickGO/GTerm?id=GO:0006533	[]
12	6,7,9,10,11,12	positive regulation of prolactin secretion	GO:1902722	0.00937	0.0565	0	0	0	0	Abat|1	1	4	126	53607	http://www.ebi.ac.uk/QuickGO/GTerm?id=GO:1902722	[]
6	4,6	transforming growth factor beta activation	GO:0036363	0.00937	0.0565	0	0	0	0	Hsp90ab1|1	1	4	126	53607	http://www.ebi.ac.uk/QuickGO/GTerm?id=GO:0036363	[]
8	8	polyamine acetylation	GO:0032917	0.00937	0.0565	0	0	0	0	Sat2|1	1	4	126	53607	http://www.ebi.ac.uk/QuickGO/GTerm?id=GO:0032917	[]
6	6	pteridine-containing compound catabolic process	GO:0042560	0.00937	0.0565	0	0	0	0	Aldh1l1|1	1	4	126	53607	http://www.ebi.ac.uk/QuickGO/GTerm?id=GO:0042560	[]
9	6,9	spermidine acetylation	GO:0032918	0.00937	0.0565	0	0	0	0	Sat2|1	1	4	126	53607	http://www.ebi.ac.uk/QuickGO/GTerm?id=GO:0032918	[]
8	8	chemical synaptic transmission	GO:0007268	0.00938	0.0565	0	0	0	0	Dbi|1;Ywhag|1;Cyfip1|1;Gnai1|1;Ppp3ca|1;Abat|1;Syn1|1;Rac1|1;Calb1|1	9	1506	126	53607	http://www.ebi.ac.uk/QuickGO/GTerm?id=GO:0007268	[]
6	6	nucleoside bisphosphate metabolic process	GO:0033865	0.00945	0.0565	0	0	0	0	Mcee|1;Acat1|1	2	62	126	53607	http://www.ebi.ac.uk/QuickGO/GTerm?id=GO:0033865	[]
6	6	purine nucleoside bisphosphate metabolic process	GO:0034032	0.00945	0.0565	0	0	0	0	Mcee|1;Acat1|1	2	62	126	53607	http://www.ebi.ac.uk/QuickGO/GTerm?id=GO:0034032	[]
11	10,11	mitochondrial calcium ion homeostasis	GO:0051560	0.00945	0.0565	0	0	0	0	Immt|1;Anxa6|1	2	62	126	53607	http://www.ebi.ac.uk/QuickGO/GTerm?id=GO:0051560	[]
7	7	ribonucleoside bisphosphate metabolic process	GO:0033875	0.00945	0.0565	0	0	0	0	Mcee|1;Acat1|1	2	62	126	53607	http://www.ebi.ac.uk/QuickGO/GTerm?id=GO:0033875	[]
5	5	negative regulation of reactive oxygen species biosynthetic process	GO:1903427	0.00945	0.0565	0	0	0	0	Ndufc2|1;Hspd1|1	2	62	126	53607	http://www.ebi.ac.uk/QuickGO/GTerm?id=GO:1903427	[]
5	5	protein stabilization	GO:0050821	0.00958	0.0572	0	0	0	0	Ep300|1;Ptges3|1;Hspd1|1;Calr|1	4	350	126	53607	http://www.ebi.ac.uk/QuickGO/GTerm?id=GO:0050821	[]
5	5	regulation of secretion	GO:0051046	0.00972	0.0579	0	0	0	0	Ep300|1;Idh2|1;Sptbn1|1;Ppp3ca|1;Glud1|1;Abat|1;Anxa5|1;Sept5|1;Hspd1|1;Vsnl1|1	10	1787	126	53607	http://www.ebi.ac.uk/QuickGO/GTerm?id=GO:0051046	[]
9	6,7,8,9	mitochondrial electron transport, NADH to ubiquinone	GO:0006120	0.00975	0.0579	0	0	0	0	Ndufc2|1;Dld|1	2	63	126	53607	http://www.ebi.ac.uk/QuickGO/GTerm?id=GO:0006120	[]
2	2	cellular component organization or biogenesis	GO:0071840	0.00985	0.0584	0	0	0	0	Ywhaz|1;H2afz|1;Ep300|1;Spta1|1;H2afj|1;Sept11|1;Tfam|1;Hnrnpa2b1|1;Cltc|1;Negr1|1;H3f3c|1;Cyfip1|1;Jade3|1;Rock2|1;Ptges3|1;Lrpprc|1;Lypla1|1;Aldh5a1|1;Clybl|1;Immt|1;Ndufc2|1;Prdx3|1;Gnao1|1;Sptbn1|1;Gnai1|1;Ppp3ca|1;Uqcrb|1;Ndufa5|1;Anxa5|1;Pdk1|1;Iba57|1;H2afy2|1;Pura|1;Atp6v0a1|1;Cyb5r1|1;Cnp|1;Uqcr10|1;Top1|1;Anxa6|1;Ndufb4|1;Acat1|1;Hsp90ab1|1;Slc1a2|1;Rac1|1;Sh3gl2|1;Hspd1|1;Hspa9|1;Slc12…	51	16265	126	53607	http://www.ebi.ac.uk/QuickGO/GTerm?id=GO:0071840	[]
5	5	response to peptide	GO:1901652	0.0099	0.0586	0	0	0	0	H2afz|1;Ywhag|1;Cyfip1|1;Rock2|1;Got2|1;Anxa5|1;Ass1|1	7	1006	126	53607	http://www.ebi.ac.uk/QuickGO/GTerm?id=GO:1901652	[]
7	4,7	regulation of hormone secretion	GO:0046883	0.01	0.0593	0	0	0	0	Ppp3ca|1;Glud1|1;Abat|1;Anxa5|1;Vsnl1|1	5	552	126	53607	http://www.ebi.ac.uk/QuickGO/GTerm?id=GO:0046883	[]
7	7	glutamine metabolic process	GO:0006541	0.0103	0.0607	0	0	0	0	Aldh5a1|1;Glud1|1	2	65	126	53607	http://www.ebi.ac.uk/QuickGO/GTerm?id=GO:0006541	[]
5	5	glucose 6-phosphate metabolic process	GO:0051156	0.0103	0.0607	0	0	0	0	Taldo1|1;Tpi1|1	2	65	126	53607	http://www.ebi.ac.uk/QuickGO/GTerm?id=GO:0051156	[]
7	5,7	chromatin silencing	GO:0006342	0.0104	0.0607	0	0	0	0	H2afz|1;H2afj|1;H2afy2|1	3	190	126	53607	http://www.ebi.ac.uk/QuickGO/GTerm?id=GO:0006342	[]
11	5,6,8,9,10,11	positive regulation of peptide hormone secretion	GO:0090277	0.0104	0.0607	0	0	0	0	Glud1|1;Abat|1;Vsnl1|1	3	190	126	53607	http://www.ebi.ac.uk/QuickGO/GTerm?id=GO:0090277	[]
4	4	cellular lipid metabolic process	GO:0044255	0.0104	0.061	0	0	0	0	Dbi|1;Etfdh|1;Ptges3|1;Lypla1|1;Aldh5a1|1;Decr2|1;Pdk1|1;Sptlc3|1;Dld|1;Acat1|1;Rac1|1;Fam213b|1	12	2379	126	53607	http://www.ebi.ac.uk/QuickGO/GTerm?id=GO:0044255	[]
4	4	single-organism cellular localization	GO:1902580	0.0105	0.0611	0	0	0	0	Ep300|1;Cltc|1;Rock2|1;Lypla1|1;Sptbn1|1;Ppp3ca|1;Syn1|1;Cyb5r1|1;Hsp90ab1|1;Rac1|1;Sh3gl2|1;Amph|1;Epb41l3|1	13	2677	126	53607	http://www.ebi.ac.uk/QuickGO/GTerm?id=GO:1902580	[]
7	6,7	fatty acid oxidation	GO:0019395	0.0105	0.0611	0	0	0	0	Dbi|1;Etfdh|1;Acat1|1	3	191	126	53607	http://www.ebi.ac.uk/QuickGO/GTerm?id=GO:0019395	[]
6	6	ammonium transport	GO:0015696	0.0105	0.0611	0	0	0	0	Ywhaz|1;Abat|1;Slc12a2|1	3	191	126	53607	http://www.ebi.ac.uk/QuickGO/GTerm?id=GO:0015696	[]
7	4,6,7	secretion by cell	GO:0032940	0.0105	0.0611	0	0	0	0	Ywhaz|1;Ep300|1;Idh2|1;Sptbn1|1;Ppp3ca|1;Glud1|1;Abat|1;Anxa5|1;Syn1|1;Sept5|1;Hspd1|1;Vsnl1|1	12	2382	126	53607	http://www.ebi.ac.uk/QuickGO/GTerm?id=GO:0032940	[]
8	6,7,8	regulation of keratinocyte differentiation	GO:0045616	0.0107	0.0615	0	0	0	0	Rock2|1;H2afy2|1	2	66	126	53607	http://www.ebi.ac.uk/QuickGO/GTerm?id=GO:0045616	[]
7	6,7	mitochondrial RNA metabolic process	GO:0000959	0.0107	0.0615	0	0	0	0	Tfam|1;Lrpprc|1	2	66	126	53607	http://www.ebi.ac.uk/QuickGO/GTerm?id=GO:0000959	[]
6	6	long-term memory	GO:0007616	0.0107	0.0615	0	0	0	0	Glud1|1;Calb1|1	2	66	126	53607	http://www.ebi.ac.uk/QuickGO/GTerm?id=GO:0007616	[]
8	4,5,6,7,8	positive regulation of intracellular protein transport	GO:0090316	0.0108	0.062	0	0	0	0	Ep300|1;Ppp3ca|1;Ywhae|1;Cyb5r1|1;Hsp90ab1|1	5	562	126	53607	http://www.ebi.ac.uk/QuickGO/GTerm?id=GO:0090316	[]
9	7,8,9	peptide hormone secretion	GO:0030072	0.0109	0.0628	0	0	0	0	Ppp3ca|1;Glud1|1;Abat|1;Anxa5|1;Vsnl1|1	5	564	126	53607	http://www.ebi.ac.uk/QuickGO/GTerm?id=GO:0030072	[]
9	5,7,8,9	positive regulation of peptide secretion	GO:0002793	0.0111	0.0637	0	0	0	0	Glud1|1;Abat|1;Vsnl1|1	3	195	126	53607	http://www.ebi.ac.uk/QuickGO/GTerm?id=GO:0002793	[]
8	6,7,8	negative regulation of neuron apoptotic process	GO:0043524	0.0111	0.0638	0	0	0	0	Dnajc5|1;Prdx3|1;Hsp90ab1|1;Hspd1|1	4	366	126	53607	http://www.ebi.ac.uk/QuickGO/GTerm?id=GO:0043524	[]
6	5,6	lipid oxidation	GO:0034440	0.0113	0.0642	0	0	0	0	Dbi|1;Etfdh|1;Acat1|1	3	196	126	53607	http://www.ebi.ac.uk/QuickGO/GTerm?id=GO:0034440	[]
8	5,7,8	positive regulation of endothelial cell migration	GO:0010595	0.0113	0.0642	0	0	0	0	Rock2|1;Atp5a1|1;Calr|1	3	196	126	53607	http://www.ebi.ac.uk/QuickGO/GTerm?id=GO:0010595	[]
7	7	polyol catabolic process	GO:0046174	0.0113	0.0642	0	0	0	0	Gpd2|1;Tpi1|1	2	68	126	53607	http://www.ebi.ac.uk/QuickGO/GTerm?id=GO:0046174	[]
6	6	DNA conformation change	GO:0071103	0.0113	0.0643	0	0	0	0	Hnrnpa2b1|1;H3f3c|1;H2afy2|1;Pura|1;Top1|1	5	569	126	53607	http://www.ebi.ac.uk/QuickGO/GTerm?id=GO:0071103	[]
7	7	acidic amino acid transport	GO:0015800	0.0116	0.0649	0	0	0	0	Abat|1;Slc1a2|1	2	69	126	53607	http://www.ebi.ac.uk/QuickGO/GTerm?id=GO:0015800	[]
11	6,8,9,10,11	regulation of insulin secretion	GO:0050796	0.0117	0.0649	0	0	0	0	Ppp3ca|1;Glud1|1;Abat|1;Vsnl1|1	4	371	126	53607	http://www.ebi.ac.uk/QuickGO/GTerm?id=GO:0050796	[]
6	6	negative regulation of hematopoietic stem cell differentiation	GO:1902037	0.0117	0.0649	0	0	0	0	Hspa9|1	1	5	126	53607	http://www.ebi.ac.uk/QuickGO/GTerm?id=GO:1902037	[]
8	8	fumarate metabolic process	GO:0006106	0.0117	0.0649	0	0	0	0	Got2|1	1	5	126	53607	http://www.ebi.ac.uk/QuickGO/GTerm?id=GO:0006106	[]
7	5,6,7	negative regulation of interleukin-23 production	GO:0032707	0.0117	0.0649	0	0	0	0	Rac1|1	1	5	126	53607	http://www.ebi.ac.uk/QuickGO/GTerm?id=GO:0032707	[]
6	5,6	positive regulation of membrane tubulation	GO:1903527	0.0117	0.0649	0	0	0	0	Sh3gl2|1	1	5	126	53607	http://www.ebi.ac.uk/QuickGO/GTerm?id=GO:1903527	[]
8	6,7,8	positive regulation of T cell mediated immune response to tumor cell	GO:0002842	0.0117	0.0649	0	0	0	0	Hspd1|1	1	5	126	53607	http://www.ebi.ac.uk/QuickGO/GTerm?id=GO:0002842	[]
7	5,7	regulation of muscle atrophy	GO:0014735	0.0117	0.0649	0	0	0	0	Ep300|1	1	5	126	53607	http://www.ebi.ac.uk/QuickGO/GTerm?id=GO:0014735	[]
4	4	negative regulation of complement-dependent cytotoxicity	GO:1903660	0.0117	0.0649	0	0	0	0	Hsp90ab1|1	1	5	126	53607	http://www.ebi.ac.uk/QuickGO/GTerm?id=GO:1903660	[]
4	4	regulation of complement-dependent cytotoxicity	GO:1903659	0.0117	0.0649	0	0	0	0	Hsp90ab1|1	1	5	126	53607	http://www.ebi.ac.uk/QuickGO/GTerm?id=GO:1903659	[]
10	5,6,7,9,10	negative regulation of dopamine secretion	GO:0033602	0.0117	0.0649	0	0	0	0	Abat|1	1	5	126	53607	http://www.ebi.ac.uk/QuickGO/GTerm?id=GO:0033602	[]
5	5	peptide antigen assembly with MHC protein complex	GO:0002501	0.0117	0.0649	0	0	0	0	Calr|1	1	5	126	53607	http://www.ebi.ac.uk/QuickGO/GTerm?id=GO:0002501	[]
6	6	fatty acid catabolic process	GO:0009062	0.0117	0.065	0	0	0	0	Dbi|1;Etfdh|1;Acat1|1	3	199	126	53607	http://www.ebi.ac.uk/QuickGO/GTerm?id=GO:0009062	[]
5	5	regulation of intracellular transport	GO:0032386	0.0118	0.0655	0	0	0	0	Ep300|1;Cyfip1|1;Lypla1|1;Sptbn1|1;Ppp3ca|1;Ywhae|1;Cyb5r1|1;Hsp90ab1|1	8	1298	126	53607	http://www.ebi.ac.uk/QuickGO/GTerm?id=GO:0032386	[]
5	5	response to unfolded protein	GO:0006986	0.0119	0.0657	0	0	0	0	Ep300|1;Hspa4l|1;Hspd1|1	3	200	126	53607	http://www.ebi.ac.uk/QuickGO/GTerm?id=GO:0006986	[]
5	5	regulation of organelle organization	GO:0033043	0.0119	0.0658	0	0	0	0	Ep300|1;Spta1|1;Hnrnpa2b1|1;Cltc|1;Cyfip1|1;Rock2|1;Lrpprc|1;Sptbn1|1;Gnai1|1;Anxa5|1;Pdk1|1;Cyb5r1|1;Rac1|1;Mdh1|1;Calr|1	15	3340	126	53607	http://www.ebi.ac.uk/QuickGO/GTerm?id=GO:0033043	[]
6	5,6	myeloid cell development	GO:0061515	0.0121	0.0663	0	0	0	0	Ep300|1;Hbb-b1|1;Hba|1	3	201	126	53607	http://www.ebi.ac.uk/QuickGO/GTerm?id=GO:0061515	[]
9	7,8,9	regulation of protein import into nucleus	GO:0042306	0.0122	0.067	0	0	0	0	Ep300|1;Sptbn1|1;Ppp3ca|1;Hsp90ab1|1	4	376	126	53607	http://www.ebi.ac.uk/QuickGO/GTerm?id=GO:0042306	[]
4	4	'de novo' protein folding	GO:0006458	0.0123	0.067	0	0	0	0	Ptges3|1;Hspd1|1	2	71	126	53607	http://www.ebi.ac.uk/QuickGO/GTerm?id=GO:0006458	[]
6	6	response to morphine	GO:0043278	0.0123	0.067	0	0	0	0	Gnao1|1;Got2|1	2	71	126	53607	http://www.ebi.ac.uk/QuickGO/GTerm?id=GO:0043278	[]
4	4	cellular response to chemical stimulus	GO:0070887	0.0124	0.0673	0	0	0	0	H2afz|1;Ep300|1;Hnrnpa1|1;Ywhag|1;Hnrnpa2b1|1;Cyfip1|1;Rock2|1;Ptges3|1;Prdx3|1;Ube2o|1;Gnai1|1;Ppp3ca|1;Atp2b1|1;Eef2|1;Anxa5|1;Pdk1|1;Hsp90ab1|1;Ass1|1;Rac1|1;Sh3gl2|1;Hspa9|1;Calb1|1;Vsnl1|1;Calr|1	24	6342	126	53607	http://www.ebi.ac.uk/QuickGO/GTerm?id=GO:0070887	[]
4	4	reactive oxygen species metabolic process	GO:0072593	0.0124	0.0673	0	0	0	0	Ndufc2|1;Prdx3|1;Hsp90ab1|1;Ass1|1;Hspd1|1	5	582	126	53607	http://www.ebi.ac.uk/QuickGO/GTerm?id=GO:0072593	[]
4	4	endomembrane system organization	GO:0010256	0.0124	0.0673	0	0	0	0	Ywhaz|1;Spta1|1;Cltc|1;Rock2|1;Lypla1|1;Sptbn1|1;Rac1|1;Sh3gl2|1;Epb41l3|1	9	1577	126	53607	http://www.ebi.ac.uk/QuickGO/GTerm?id=GO:0010256	[]
7	6,7	regulation of DNA replication	GO:0006275	0.0125	0.0679	0	0	0	0	Ptges3|1;Hsp90ab1|1;Rac1|1;Calr|1	4	379	126	53607	http://www.ebi.ac.uk/QuickGO/GTerm?id=GO:0006275	[]
5	5	signal release	GO:0023061	0.0125	0.0679	0	0	0	0	Ywhaz|1;Ppp3ca|1;Glud1|1;Abat|1;Anxa5|1;Syn1|1;Vsnl1|1	7	1054	126	53607	http://www.ebi.ac.uk/QuickGO/GTerm?id=GO:0023061	[]
6	6	regulation of mitotic spindle organization	GO:0060236	0.0126	0.068	0	0	0	0	Cltc|1;Gnai1|1	2	72	126	53607	http://www.ebi.ac.uk/QuickGO/GTerm?id=GO:0060236	[]
4	4	cellular response to external stimulus	GO:0071496	0.0127	0.0683	0	0	0	0	Ldha|1;Atp2b1|1;Anxa5|1;Pdk1|1;Slc1a2|1;Rac1|1;Mdh1|1	7	1056	126	53607	http://www.ebi.ac.uk/QuickGO/GTerm?id=GO:0071496	[]
6	5,6	regulation of reactive oxygen species metabolic process	GO:2000377	0.0128	0.0687	0	0	0	0	Ndufc2|1;Hsp90ab1|1;Ass1|1;Hspd1|1	4	381	126	53607	http://www.ebi.ac.uk/QuickGO/GTerm?id=GO:2000377	[]
5	5	regulation of muscle system process	GO:0090257	0.0129	0.0691	0	0	0	0	Ep300|1;Rock2|1;Ppp3ca|1;Abat|1;Anxa6|1	5	588	126	53607	http://www.ebi.ac.uk/QuickGO/GTerm?id=GO:0090257	[]
7	6,7	response to isoquinoline alkaloid	GO:0014072	0.0129	0.0691	0	0	0	0	Gnao1|1;Got2|1	2	73	126	53607	http://www.ebi.ac.uk/QuickGO/GTerm?id=GO:0014072	[]
6	6	prostanoid metabolic process	GO:0006692	0.0129	0.0691	0	0	0	0	Ptges3|1;Fam213b|1	2	73	126	53607	http://www.ebi.ac.uk/QuickGO/GTerm?id=GO:0006692	[]
7	7	prostaglandin metabolic process	GO:0006693	0.0129	0.0691	0	0	0	0	Ptges3|1;Fam213b|1	2	73	126	53607	http://www.ebi.ac.uk/QuickGO/GTerm?id=GO:0006693	[]
6	6	synaptic vesicle localization	GO:0097479	0.0131	0.0699	0	0	0	0	Cyfip1|1;Syn1|1;Sh3gl2|1;Amph|1	4	384	126	53607	http://www.ebi.ac.uk/QuickGO/GTerm?id=GO:0097479	[]
7	6,7	mRNA transport	GO:0051028	0.0132	0.0703	0	0	0	0	Hnrnpa1|1;Hnrnpa2b1|1;Lrpprc|1	3	208	126	53607	http://www.ebi.ac.uk/QuickGO/GTerm?id=GO:0051028	[]
4	4	response to osmotic stress	GO:0006970	0.0132	0.0703	0	0	0	0	Hsp90ab1|1;Rac1|1;Slc12a2|1	3	208	126	53607	http://www.ebi.ac.uk/QuickGO/GTerm?id=GO:0006970	[]
7	6,7	negative regulation of gene expression, epigenetic	GO:0045814	0.0134	0.0711	0	0	0	0	H2afz|1;H2afj|1;H2afy2|1	3	209	126	53607	http://www.ebi.ac.uk/QuickGO/GTerm?id=GO:0045814	[]
7	7	cellular response to dexamethasone stimulus	GO:0071549	0.0136	0.0721	0	0	0	0	Ep300|1;Ass1|1	2	75	126	53607	http://www.ebi.ac.uk/QuickGO/GTerm?id=GO:0071549	[]
4	4	response to ischemia	GO:0002931	0.0139	0.0728	0	0	0	0	Eef2|1;Hspd1|1	2	76	126	53607	http://www.ebi.ac.uk/QuickGO/GTerm?id=GO:0002931	[]
6	5,6	lipoate metabolic process	GO:0009106	0.014	0.0728	0	0	0	0	Dld|1	1	6	126	53607	http://www.ebi.ac.uk/QuickGO/GTerm?id=GO:0009106	[]
8	6,8	gamma-aminobutyric acid biosynthetic process	GO:0009449	0.014	0.0728	0	0	0	0	Abat|1	1	6	126	53607	http://www.ebi.ac.uk/QuickGO/GTerm?id=GO:0009449	[]
8	7,8	MHC protein complex assembly	GO:0002396	0.014	0.0728	0	0	0	0	Calr|1	1	6	126	53607	http://www.ebi.ac.uk/QuickGO/GTerm?id=GO:0002396	[]
7	5,6,7	positive regulation of sarcomere organization	GO:0060298	0.014	0.0728	0	0	0	0	Ep300|1	1	6	126	53607	http://www.ebi.ac.uk/QuickGO/GTerm?id=GO:0060298	[]
10	7,9,10	negative regulation of mitochondrial RNA catabolic process	GO:0000961	0.014	0.0728	0	0	0	0	Lrpprc|1	1	6	126	53607	http://www.ebi.ac.uk/QuickGO/GTerm?id=GO:0000961	[]
7	7	isoleucine catabolic process	GO:0006550	0.014	0.0728	0	0	0	0	Acat1|1	1	6	126	53607	http://www.ebi.ac.uk/QuickGO/GTerm?id=GO:0006550	[]
7	7	lipid tube assembly	GO:0060988	0.014	0.0728	0	0	0	0	Sh3gl2|1	1	6	126	53607	http://www.ebi.ac.uk/QuickGO/GTerm?id=GO:0060988	[]
7	6,7	transepithelial ammonium transport	GO:0070634	0.014	0.0728	0	0	0	0	Slc12a2|1	1	6	126	53607	http://www.ebi.ac.uk/QuickGO/GTerm?id=GO:0070634	[]
4	4	metanephric part of ureteric bud development	GO:0035502	0.014	0.0728	0	0	0	0	Calb1|1	1	6	126	53607	http://www.ebi.ac.uk/QuickGO/GTerm?id=GO:0035502	[]
6	6	cellular response to amine stimulus	GO:0071418	0.014	0.0728	0	0	0	0	Ass1|1	1	6	126	53607	http://www.ebi.ac.uk/QuickGO/GTerm?id=GO:0071418	[]
7	6,7	DNA replication	GO:0006260	0.014	0.0728	0	0	0	0	Ptges3|1;Pura|1;Top1|1;Hsp90ab1|1;Rac1|1;Calr|1	6	831	126	53607	http://www.ebi.ac.uk/QuickGO/GTerm?id=GO:0006260	[]
7	7	generation of neurons	GO:0048699	0.0142	0.0736	0	0	0	0	Ep300|1;Ywhag|1;Negr1|1;Cyfip1|1;Idh2|1;Rock2|1;Gnao1|1;Ppp3ca|1;Ywhae|1;Syn1|1;Psd3|1;Cnp|1;Hsp90ab1|1;Rac1|1;Sh3gl2|1;Epb41l3|1;Calr|1	17	4053	126	53607	http://www.ebi.ac.uk/QuickGO/GTerm?id=GO:0048699	[]
6	4,6	positive regulation of muscle hypertrophy	GO:0014742	0.0143	0.0738	0	0	0	0	Rock2|1;Ppp3ca|1	2	77	126	53607	http://www.ebi.ac.uk/QuickGO/GTerm?id=GO:0014742	[]
7	5,7	positive regulation of cardiac muscle hypertrophy	GO:0010613	0.0143	0.0738	0	0	0	0	Rock2|1;Ppp3ca|1	2	77	126	53607	http://www.ebi.ac.uk/QuickGO/GTerm?id=GO:0010613	[]
4	4	forebrain development	GO:0030900	0.0144	0.0743	0	0	0	0	Dbi|1;Gnao1|1;Ywhae|1;Cnp|1;Slc1a2|1;Rac1|1;Slc32a1|1	7	1084	126	53607	http://www.ebi.ac.uk/QuickGO/GTerm?id=GO:0030900	[]
4	4	positive regulation of response to external stimulus	GO:0032103	0.0145	0.0744	0	0	0	0	Anxa5|1;Pdk1|1;Rac1|1;Hspd1|1;Mdh1|1;Calr|1	6	837	126	53607	http://www.ebi.ac.uk/QuickGO/GTerm?id=GO:0032103	[]
7	6,7	negative regulation of translation	GO:0017148	0.0145	0.0744	0	0	0	0	Hnrnpa2b1|1;Ppp3ca|1;Pura|1;Calr|1	4	396	126	53607	http://www.ebi.ac.uk/QuickGO/GTerm?id=GO:0017148	[]
4	4	regulation of membrane potential	GO:0042391	0.0145	0.0745	0	0	0	0	Ppa2|1;Ndufc2|1;Prdx3|1;Ppp3ca|1;Abat|1;Ywhae|1;Dld|1	7	1086	126	53607	http://www.ebi.ac.uk/QuickGO/GTerm?id=GO:0042391	[]
7	5,6,7	positive regulation of substrate adhesion-dependent cell spreading	GO:1900026	0.0146	0.0749	0	0	0	0	Rac1|1;Calr|1	2	78	126	53607	http://www.ebi.ac.uk/QuickGO/GTerm?id=GO:1900026	[]
6	6	regulation of cytoskeleton organization	GO:0051493	0.015	0.0765	0	0	0	0	Ep300|1;Spta1|1;Cltc|1;Cyfip1|1;Rock2|1;Sptbn1|1;Gnai1|1;Rac1|1	8	1355	126	53607	http://www.ebi.ac.uk/QuickGO/GTerm?id=GO:0051493	[]
4	4	positive regulation of tissue remodeling	GO:0034105	0.015	0.0765	0	0	0	0	Rock2|1;Ppp3ca|1	2	79	126	53607	http://www.ebi.ac.uk/QuickGO/GTerm?id=GO:0034105	[]
9	6,7,8,9	mitochondrial electron transport, ubiquinol to cytochrome c	GO:0006122	0.0154	0.0782	0	0	0	0	Uqcrb|1;Uqcr10|1	2	80	126	53607	http://www.ebi.ac.uk/QuickGO/GTerm?id=GO:0006122	[]
4	4	regulation of hormone levels	GO:0010817	0.0156	0.0791	0	0	0	0	Ywhaz|1;Afp|1;Ppp3ca|1;Glud1|1;Abat|1;Anxa5|1;Vsnl1|1	7	1101	126	53607	http://www.ebi.ac.uk/QuickGO/GTerm?id=GO:0010817	[]
4	4	organic hydroxy compound metabolic process	GO:1901615	0.0157	0.0797	0	0	0	0	Dbi|1;Ldha|1;Gpd2|1;Abat|1;Cyb5r1|1;Aldh7a1|1;Tpi1|1	7	1103	126	53607	http://www.ebi.ac.uk/QuickGO/GTerm?id=GO:1901615	[]
5	5	cellular response to organic substance	GO:0071310	0.0158	0.08	0	0	0	0	H2afz|1;Ep300|1;Ywhag|1;Hnrnpa2b1|1;Cyfip1|1;Rock2|1;Ptges3|1;Ube2o|1;Gnai1|1;Ppp3ca|1;Atp2b1|1;Eef2|1;Anxa5|1;Hsp90ab1|1;Ass1|1;Sh3gl2|1;Hspa9|1;Calb1|1;Vsnl1|1;Calr|1	20	5102	126	53607	http://www.ebi.ac.uk/QuickGO/GTerm?id=GO:0071310	[]
10	5,6,8,9,10	positive regulation of protein import into nucleus	GO:0042307	0.0159	0.0803	0	0	0	0	Ep300|1;Ppp3ca|1;Hsp90ab1|1	3	223	126	53607	http://www.ebi.ac.uk/QuickGO/GTerm?id=GO:0042307	[]
8	7,8	regulation of protein targeting	GO:1903533	0.0161	0.0809	0	0	0	0	Ep300|1;Sptbn1|1;Ppp3ca|1;Cyb5r1|1;Hsp90ab1|1	5	622	126	53607	http://www.ebi.ac.uk/QuickGO/GTerm?id=GO:1903533	[]
5	5	positive regulation of binding	GO:0051099	0.0163	0.0809	0	0	0	0	Ep300|1;Spta1|1;Eno1|1;Hsp90ab1|1	4	410	126	53607	http://www.ebi.ac.uk/QuickGO/GTerm?id=GO:0051099	[]
6	6	cellular biogenic amine metabolic process	GO:0006576	0.0163	0.0809	0	0	0	0	Dbi|1;Aldh7a1|1;Sat2|1	3	225	126	53607	http://www.ebi.ac.uk/QuickGO/GTerm?id=GO:0006576	[]
7	7	protein localization to nucleus	GO:0034504	0.0163	0.0809	0	0	0	0	Ep300|1;Sptbn1|1;Ppp3ca|1;Hnrnpm|1;Hsp90ab1|1;Calr|1	6	860	126	53607	http://www.ebi.ac.uk/QuickGO/GTerm?id=GO:0034504	[]
9	6,7,8,9	mitochondrial electron transport, succinate to ubiquinone	GO:0006121	0.0163	0.0809	0	0	0	0	Sdha|1	1	7	126	53607	http://www.ebi.ac.uk/QuickGO/GTerm?id=GO:0006121	[]
8	7,8	10-formyltetrahydrofolate metabolic process	GO:0009256	0.0163	0.0809	0	0	0	0	Aldh1l1|1	1	7	126	53607	http://www.ebi.ac.uk/QuickGO/GTerm?id=GO:0009256	[]
10	6,9,10	regulation of acetyl-CoA biosynthetic process from pyruvate	GO:0010510	0.0163	0.0809	0	0	0	0	Pdk1|1	1	7	126	53607	http://www.ebi.ac.uk/QuickGO/GTerm?id=GO:0010510	[]
3	3	complement-dependent cytotoxicity	GO:0097278	0.0163	0.0809	0	0	0	0	Hsp90ab1|1	1	7	126	53607	http://www.ebi.ac.uk/QuickGO/GTerm?id=GO:0097278	[]
9	7,8,9	transcription initiation from mitochondrial promoter	GO:0006391	0.0163	0.0809	0	0	0	0	Tfam|1	1	7	126	53607	http://www.ebi.ac.uk/QuickGO/GTerm?id=GO:0006391	[]
9	6,7,9	negative regulation of bicellular tight junction assembly	GO:1903347	0.0163	0.0809	0	0	0	0	Rock2|1	1	7	126	53607	http://www.ebi.ac.uk/QuickGO/GTerm?id=GO:1903347	[]
9	6,7,9	negative regulation of glial cell migration	GO:1903976	0.0163	0.0809	0	0	0	0	Idh2|1	1	7	126	53607	http://www.ebi.ac.uk/QuickGO/GTerm?id=GO:1903976	[]
7	7	cellular response to oleic acid	GO:0071400	0.0163	0.0809	0	0	0	0	Ass1|1	1	7	126	53607	http://www.ebi.ac.uk/QuickGO/GTerm?id=GO:0071400	[]
3	3	negative regulation of cellular process	GO:0048523	0.0164	0.0809	0	0	0	0	Ywhaq|1;Cbx1|1;Pabpc1|1;H2afz|1;Ep300|1;Dbi|1;Spta1|1;H2afj|1;Hmgn2|1;Hnrnpa2b1|1;Cltc|1;Cyfip1|1;Idh2|1;Rock2|1;Taf6|1;Ptges3|1;Lrpprc|1;Lypla1|1;Dnajc5|1;Ndufc2|1;Prdx3|1;Sptbn1|1;Gnai1|1;Ppp3ca|1;Abat|1;Anxa5|1;Ywhae|1;Eno1|1;H2afy2|1;Pura|1;Basp1|1;Hsp90ab1|1;Ass1|1;Atp5a1|1;Hspd1|1;Hspa9|1;Vsnl1|1;Calr|1	38	11630	126	53607	http://www.ebi.ac.uk/QuickGO/GTerm?id=GO:0048523	[]
8	5,7,8	gene silencing by RNA	GO:0031047	0.0165	0.0809	0	0	0	0	Pabpc1|1;Hnrnpa2b1|1;Ppp3ca|1	3	226	126	53607	http://www.ebi.ac.uk/QuickGO/GTerm?id=GO:0031047	[]
9	5,7,8,9	negative regulation of protein localization to plasma membrane	GO:1903077	0.0165	0.0809	0	0	0	0	Cltc|1;Lypla1|1	2	83	126	53607	http://www.ebi.ac.uk/QuickGO/GTerm?id=GO:1903077	[]
10	10	synaptic transmission, GABAergic	GO:0051932	0.0165	0.0809	0	0	0	0	Dbi|1;Rac1|1	2	83	126	53607	http://www.ebi.ac.uk/QuickGO/GTerm?id=GO:0051932	[]
7	6,7	porphyrin-containing compound biosynthetic process	GO:0006779	0.0165	0.0809	0	0	0	0	Spta1|1;Iba57|1	2	83	126	53607	http://www.ebi.ac.uk/QuickGO/GTerm?id=GO:0006779	[]
3	3	single-organism behavior	GO:0044708	0.0166	0.0814	0	0	0	0	Ep300|1;Dbi|1;Glud1|1;Abat|1;Cnp|1;Slc1a2|1;Amph|1;Calb1|1	8	1381	126	53607	http://www.ebi.ac.uk/QuickGO/GTerm?id=GO:0044708	[]
6	5,6	regulation of actin cytoskeleton organization	GO:0032956	0.0168	0.0819	0	0	0	0	Ep300|1;Spta1|1;Cyfip1|1;Rock2|1;Sptbn1|1;Rac1|1	6	865	126	53607	http://www.ebi.ac.uk/QuickGO/GTerm?id=GO:0032956	[]
5	5	regulation of spindle organization	GO:0090224	0.0169	0.0819	0	0	0	0	Cltc|1;Gnai1|1	2	84	126	53607	http://www.ebi.ac.uk/QuickGO/GTerm?id=GO:0090224	[]
8	4,7,8	negative regulation of protein localization to cell periphery	GO:1904376	0.0169	0.0819	0	0	0	0	Cltc|1;Lypla1|1	2	84	126	53607	http://www.ebi.ac.uk/QuickGO/GTerm?id=GO:1904376	[]
8	7,8	ncRNA transcription	GO:0098781	0.0169	0.0819	0	0	0	0	H2afy2|1;Top1|1	2	84	126	53607	http://www.ebi.ac.uk/QuickGO/GTerm?id=GO:0098781	[]
6	6	response to amine	GO:0014075	0.0169	0.0819	0	0	0	0	Ppp3ca|1;Ass1|1	2	84	126	53607	http://www.ebi.ac.uk/QuickGO/GTerm?id=GO:0014075	[]
6	6	regulation of nucleocytoplasmic transport	GO:0046822	0.0169	0.0821	0	0	0	0	Ep300|1;Ppp3ca|1;Ywhae|1;Hsp90ab1|1	4	415	126	53607	http://www.ebi.ac.uk/QuickGO/GTerm?id=GO:0046822	[]
7	5,6,7	synaptic vesicle endocytosis	GO:0048488	0.0172	0.0833	0	0	0	0	Sh3gl2|1;Amph|1	2	85	126	53607	http://www.ebi.ac.uk/QuickGO/GTerm?id=GO:0048488	[]
False	obselete	ruffle organization	GO:0031529	0.0172	0.0833	0	0	0	0	Cyfip1|1;Rac1|1	2	85	126	53607	http://www.ebi.ac.uk/QuickGO/GTerm?id=GO:0031529	[]
5	5	positive regulation of organelle organization	GO:0010638	0.0174	0.0841	0	0	0	0	Ep300|1;Hnrnpa2b1|1;Cyfip1|1;Rock2|1;Anxa5|1;Pdk1|1;Cyb5r1|1;Rac1|1;Mdh1|1	9	1671	126	53607	http://www.ebi.ac.uk/QuickGO/GTerm?id=GO:0010638	[]
4	4	regulation of muscle adaptation	GO:0043502	0.0178	0.0859	0	0	0	0	Ep300|1;Rock2|1;Ppp3ca|1	3	233	126	53607	http://www.ebi.ac.uk/QuickGO/GTerm?id=GO:0043502	[]
8	7,8	neuron projection morphogenesis	GO:0048812	0.0178	0.0859	0	0	0	0	Ep300|1;Cyfip1|1;Rock2|1;Ppp3ca|1;Cnp|1;Hsp90ab1|1;Rac1|1;Sh3gl2|1;Epb41l3|1	9	1678	126	53607	http://www.ebi.ac.uk/QuickGO/GTerm?id=GO:0048812	[]
8	6,7,8	regulation of protein localization to plasma membrane	GO:1903076	0.018	0.0867	0	0	0	0	Cltc|1;Lypla1|1;Sptbn1|1	3	234	126	53607	http://www.ebi.ac.uk/QuickGO/GTerm?id=GO:1903076	[]
5	5	neuron projection extension	GO:1990138	0.0183	0.0876	0	0	0	0	Ep300|1;Cyfip1|1;Hsp90ab1|1;Sh3gl2|1	4	425	126	53607	http://www.ebi.ac.uk/QuickGO/GTerm?id=GO:1990138	[]
6	6	response to testosterone	GO:0033574	0.0184	0.0876	0	0	0	0	Rock2|1;Calr|1	2	88	126	53607	http://www.ebi.ac.uk/QuickGO/GTerm?id=GO:0033574	[]
5	5	carbohydrate biosynthetic process	GO:0016051	0.0184	0.0876	0	0	0	0	Cltc|1;Ptges3|1;Gpd2|1;Tpi1|1	4	426	126	53607	http://www.ebi.ac.uk/QuickGO/GTerm?id=GO:0016051	[]
6	6	positive regulation of protein binding	GO:0032092	0.0184	0.0876	0	0	0	0	Ep300|1;Spta1|1;Hsp90ab1|1	3	236	126	53607	http://www.ebi.ac.uk/QuickGO/GTerm?id=GO:0032092	[]
12	11,12	regulation of postsynaptic cytosolic calcium ion concentration	GO:0099566	0.0187	0.0876	0	0	0	0	Calb1|1	1	8	126	53607	http://www.ebi.ac.uk/QuickGO/GTerm?id=GO:0099566	[]
11	11	calcium ion export from cell	GO:1990034	0.0187	0.0876	0	0	0	0	Atp2b1|1	1	8	126	53607	http://www.ebi.ac.uk/QuickGO/GTerm?id=GO:1990034	[]
5	5	ketone body catabolic process	GO:0046952	0.0187	0.0876	0	0	0	0	Acat1|1	1	8	126	53607	http://www.ebi.ac.uk/QuickGO/GTerm?id=GO:0046952	[]
11	5,6,9,10,11	positive regulation of transcription from RNA polymerase II promoter involved in unfolded protein response	GO:0006990	0.0187	0.0876	0	0	0	0	Ep300|1	1	8	126	53607	http://www.ebi.ac.uk/QuickGO/GTerm?id=GO:0006990	[]
7	7	proximal tubule development	GO:0072014	0.0187	0.0876	0	0	0	0	Acat1|1	1	8	126	53607	http://www.ebi.ac.uk/QuickGO/GTerm?id=GO:0072014	[]
9	8,9	negative regulation of peptidyl-serine dephosphorylation	GO:1902309	0.0187	0.0876	0	0	0	0	Ywhae|1	1	8	126	53607	http://www.ebi.ac.uk/QuickGO/GTerm?id=GO:1902309	[]
6	6	response to aluminum ion	GO:0010044	0.0187	0.0876	0	0	0	0	Glud1|1	1	8	126	53607	http://www.ebi.ac.uk/QuickGO/GTerm?id=GO:0010044	[]
6	6	phosphatidylcholine acyl-chain remodeling	GO:0036151	0.0187	0.0876	0	0	0	0	Dbi|1	1	8	126	53607	http://www.ebi.ac.uk/QuickGO/GTerm?id=GO:0036151	[]
7	6,7	regulation of acyl-CoA biosynthetic process	GO:0050812	0.0187	0.0876	0	0	0	0	Pdk1|1	1	8	126	53607	http://www.ebi.ac.uk/QuickGO/GTerm?id=GO:0050812	[]
6	6	unsaturated fatty acid metabolic process	GO:0033559	0.0187	0.0876	0	0	0	0	Ptges3|1;Decr2|1;Fam213b|1	3	237	126	53607	http://www.ebi.ac.uk/QuickGO/GTerm?id=GO:0033559	[]
6	6	ruffle assembly	GO:0097178	0.0188	0.0881	0	0	0	0	Cyfip1|1;Rac1|1	2	89	126	53607	http://www.ebi.ac.uk/QuickGO/GTerm?id=GO:0097178	[]
6	6	cellular response to peptide hormone stimulus	GO:0071375	0.0188	0.0881	0	0	0	0	H2afz|1;Ywhag|1;Cyfip1|1;Anxa5|1;Ass1|1	5	648	126	53607	http://www.ebi.ac.uk/QuickGO/GTerm?id=GO:0071375	[]
7	5,6,7	negative regulation of cellular amide metabolic process	GO:0034249	0.0189	0.0882	0	0	0	0	Hnrnpa2b1|1;Ppp3ca|1;Pura|1;Calr|1	4	429	126	53607	http://www.ebi.ac.uk/QuickGO/GTerm?id=GO:0034249	[]
7	5,6,7	negative regulation of RNA metabolic process	GO:0051253	0.0189	0.0882	0	0	0	0	Ywhaq|1;Cbx1|1;Pabpc1|1;H2afz|1;Ep300|1;H2afj|1;Hmgn2|1;Hnrnpa2b1|1;Lrpprc|1;Ppp3ca|1;Eno1|1;H2afy2|1;Pura|1;Basp1|1;Calr|1	15	3531	126	53607	http://www.ebi.ac.uk/QuickGO/GTerm?id=GO:0051253	[]
4	4	developmental growth involved in morphogenesis	GO:0060560	0.019	0.0887	0	0	0	0	Ep300|1;Cyfip1|1;Hsp90ab1|1;Sh3gl2|1;Slc12a2|1	5	650	126	53607	http://www.ebi.ac.uk/QuickGO/GTerm?id=GO:0060560	[]
9	6,8,9	glycolytic process	GO:0006096	0.0193	0.0897	0	0	0	0	Eno1|1;Pdha1|1;Tpi1|1	3	240	126	53607	http://www.ebi.ac.uk/QuickGO/GTerm?id=GO:0006096	[]
5	5	cellular response to nitrogen compound	GO:1901699	0.0193	0.0899	0	0	0	0	H2afz|1;Ep300|1;Ywhag|1;Hnrnpa2b1|1;Cyfip1|1;Ppp3ca|1;Anxa5|1;Ass1|1	8	1421	126	53607	http://www.ebi.ac.uk/QuickGO/GTerm?id=GO:1901699	[]
6	6	erythrocyte development	GO:0048821	0.0196	0.0907	0	0	0	0	Hbb-b1|1;Hba|1	2	91	126	53607	http://www.ebi.ac.uk/QuickGO/GTerm?id=GO:0048821	[]
6	6	response to dexamethasone	GO:0071548	0.0196	0.0907	0	0	0	0	Ep300|1;Ass1|1	2	91	126	53607	http://www.ebi.ac.uk/QuickGO/GTerm?id=GO:0071548	[]
10	5,9,10	ATP generation from ADP	GO:0006757	0.0197	0.0911	0	0	0	0	Eno1|1;Pdha1|1;Tpi1|1	3	242	126	53607	http://www.ebi.ac.uk/QuickGO/GTerm?id=GO:0006757	[]
4	4	response to topologically incorrect protein	GO:0035966	0.0199	0.0919	0	0	0	0	Ep300|1;Hspa4l|1;Hspd1|1	3	243	126	53607	http://www.ebi.ac.uk/QuickGO/GTerm?id=GO:0035966	[]
10	6,7,9,10	regulation of actin filament polymerization	GO:0030833	0.0202	0.093	0	0	0	0	Spta1|1;Cyfip1|1;Sptbn1|1;Rac1|1	4	438	126	53607	http://www.ebi.ac.uk/QuickGO/GTerm?id=GO:0030833	[]
8	6,7,8	regulation of telomerase activity	GO:0051972	0.0204	0.0937	0	0	0	0	Ptges3|1;Hsp90ab1|1	2	93	126	53607	http://www.ebi.ac.uk/QuickGO/GTerm?id=GO:0051972	[]
9	5,6,7,8,9	Golgi to plasma membrane protein transport	GO:0043001	0.0204	0.0937	0	0	0	0	Lypla1|1;Sptbn1|1	2	93	126	53607	http://www.ebi.ac.uk/QuickGO/GTerm?id=GO:0043001	[]
6	6	amide biosynthetic process	GO:0043604	0.0207	0.094	0	0	0	0	Ep300|1;Hbb-b1|1;Hnrnpa2b1|1;Cyfip1|1;Lrpprc|1;Ppp3ca|1;Eef2|1;Pura|1;Ass1|1;Calr|1	10	2014	126	53607	http://www.ebi.ac.uk/QuickGO/GTerm?id=GO:0043604	[]
6	5,6	positive regulation of cell morphogenesis involved in differentiation	GO:0010770	0.0209	0.094	0	0	0	0	Ep300|1;Cyfip1|1;Rac1|1;Calr|1	4	443	126	53607	http://www.ebi.ac.uk/QuickGO/GTerm?id=GO:0010770	[]
6	6	cellular response to sodium arsenite	GO:1903936	0.021	0.094	0	0	0	0	Hnrnpa1|1	1	9	126	53607	http://www.ebi.ac.uk/QuickGO/GTerm?id=GO:1903936	[]
9	6,8,9	regulation of mitochondrial RNA catabolic process	GO:0000960	0.021	0.094	0	0	0	0	Lrpprc|1	1	9	126	53607	http://www.ebi.ac.uk/QuickGO/GTerm?id=GO:0000960	[]
10	6,7,10	glucose catabolic process to lactate via pyruvate	GO:0019661	0.021	0.094	0	0	0	0	Ldha|1	1	9	126	53607	http://www.ebi.ac.uk/QuickGO/GTerm?id=GO:0019661	[]
9	9	negative regulation of myosin-light-chain-phosphatase activity	GO:0035509	0.021	0.094	0	0	0	0	Rock2|1	1	9	126	53607	http://www.ebi.ac.uk/QuickGO/GTerm?id=GO:0035509	[]
10	5,6,7,9,10	glycolytic fermentation	GO:0019660	0.021	0.094	0	0	0	0	Ldha|1	1	9	126	53607	http://www.ebi.ac.uk/QuickGO/GTerm?id=GO:0019660	[]
10	8,9,10	negative regulation of transcription of nuclear large rRNA transcript from RNA polymerase I promoter	GO:1901837	0.021	0.094	0	0	0	0	H2afy2|1	1	9	126	53607	http://www.ebi.ac.uk/QuickGO/GTerm?id=GO:1901837	[]
8	8	G-quadruplex DNA unwinding	GO:0044806	0.021	0.094	0	0	0	0	Hnrnpa2b1|1	1	9	126	53607	http://www.ebi.ac.uk/QuickGO/GTerm?id=GO:0044806	[]
4	4	choline metabolic process	GO:0019695	0.021	0.094	0	0	0	0	Aldh7a1|1	1	9	126	53607	http://www.ebi.ac.uk/QuickGO/GTerm?id=GO:0019695	[]
7	6,7	mitochondrial ATP synthesis coupled proton transport	GO:0042776	0.021	0.094	0	0	0	0	Atp5o|1	1	9	126	53607	http://www.ebi.ac.uk/QuickGO/GTerm?id=GO:0042776	[]
9	7,8,9	establishment of protein localization to chromatin	GO:0071169	0.021	0.094	0	0	0	0	H2afy2|1	1	9	126	53607	http://www.ebi.ac.uk/QuickGO/GTerm?id=GO:0071169	[]
6	6	isoleucine metabolic process	GO:0006549	0.021	0.094	0	0	0	0	Acat1|1	1	9	126	53607	http://www.ebi.ac.uk/QuickGO/GTerm?id=GO:0006549	[]
6	6	amino-acid betaine biosynthetic process	GO:0006578	0.021	0.094	0	0	0	0	Aldh7a1|1	1	9	126	53607	http://www.ebi.ac.uk/QuickGO/GTerm?id=GO:0006578	[]
5	5	response to mycotoxin	GO:0010046	0.021	0.094	0	0	0	0	Ass1|1	1	9	126	53607	http://www.ebi.ac.uk/QuickGO/GTerm?id=GO:0010046	[]
9	6,9	glucose catabolic process to lactate	GO:0019659	0.021	0.094	0	0	0	0	Ldha|1	1	9	126	53607	http://www.ebi.ac.uk/QuickGO/GTerm?id=GO:0019659	[]
6	6	tetrapyrrole biosynthetic process	GO:0033014	0.0212	0.095	0	0	0	0	Spta1|1;Iba57|1	2	95	126	53607	http://www.ebi.ac.uk/QuickGO/GTerm?id=GO:0033014	[]
6	6	regulation of cytoplasmic transport	GO:1903649	0.0214	0.0957	0	0	0	0	Ep300|1;Cyfip1|1;Lypla1|1;Ppp3ca|1;Cyb5r1|1;Hsp90ab1|1	6	915	126	53607	http://www.ebi.ac.uk/QuickGO/GTerm?id=GO:1903649	[]
4	4	learning or memory	GO:0007611	0.0217	0.097	0	0	0	0	Ep300|1;Dbi|1;Glud1|1;Amph|1;Calb1|1	5	673	126	53607	http://www.ebi.ac.uk/QuickGO/GTerm?id=GO:0007611	[]
2	2	negative regulation of biological process	GO:0048519	0.0219	0.0975	0	0	0	0	Ywhaq|1;Cbx1|1;Pabpc1|1;H2afz|1;Ep300|1;Dbi|1;Spta1|1;H2afj|1;Hmgn2|1;Hnrnpa2b1|1;Cltc|1;Cyfip1|1;Idh2|1;Rock2|1;Taf6|1;Ptges3|1;Lrpprc|1;Lypla1|1;Dnajc5|1;Ndufc2|1;Prdx3|1;Gnao1|1;Sptbn1|1;Gnai1|1;Ppp3ca|1;Abat|1;Anxa5|1;Ywhae|1;Eno1|1;H2afy2|1;Pura|1;Basp1|1;Hsp90ab1|1;Ass1|1;Atp5a1|1;Rac1|1;Hspd1|1;Hspa9|1;Vsnl1|1;Calr|1	40	12622	126	53607	http://www.ebi.ac.uk/QuickGO/GTerm?id=GO:0048519	[]
5	4,5	positive regulation of cellular component organization	GO:0051130	0.0221	0.0985	0	0	0	0	Ep300|1;Hnrnpa2b1|1;Negr1|1;Cyfip1|1;Rock2|1;Sptbn1|1;Ppp3ca|1;Anxa5|1;Pdk1|1;Cyb5r1|1;Rac1|1;Sh3gl2|1;Mdh1|1;Calr|1	14	3278	126	53607	http://www.ebi.ac.uk/QuickGO/GTerm?id=GO:0051130	[]
7	4,7	positive regulation of hormone secretion	GO:0046887	0.0223	0.0991	0	0	0	0	Glud1|1;Abat|1;Vsnl1|1	3	254	126	53607	http://www.ebi.ac.uk/QuickGO/GTerm?id=GO:0046887	[]
5	5	memory	GO:0007613	0.0223	0.0991	0	0	0	0	Ep300|1;Glud1|1;Calb1|1	3	254	126	53607	http://www.ebi.ac.uk/QuickGO/GTerm?id=GO:0007613	[]
4	4	response to cold	GO:0009409	0.0225	0.0995	0	0	0	0	Atp2b1|1;Hspd1|1	2	98	126	53607	http://www.ebi.ac.uk/QuickGO/GTerm?id=GO:0009409	[]
8	6,7,8	protein import into nucleus, translocation	GO:0000060	0.0225	0.0995	0	0	0	0	Ep300|1;Hsp90ab1|1	2	98	126	53607	http://www.ebi.ac.uk/QuickGO/GTerm?id=GO:0000060	[]
5	5	nephron epithelium development	GO:0072009	0.0226	0.0996	0	0	0	0	Acat1|1;Basp1|1;Calb1|1	3	255	126	53607	http://www.ebi.ac.uk/QuickGO/GTerm?id=GO:0072009	[]
4	4	gland development	GO:0048732	0.0227	0.1	0	0	0	0	Ep300|1;Afp|1;Aco2|1;Got2|1;Acat1|1;Ass1|1;Slc12a2|1	7	1190	126	53607	http://www.ebi.ac.uk/QuickGO/GTerm?id=GO:0048732	[]
5	5	response to amino acid	GO:0043200	0.0228	0.1	0	0	0	0	Eef2|1;Ass1|1;Slc1a2|1	3	256	126	53607	http://www.ebi.ac.uk/QuickGO/GTerm?id=GO:0043200	[]
7	6,7	pentose-phosphate shunt, non-oxidative branch	GO:0009052	0.0233	0.1	0	0	0	0	Taldo1|1	1	10	126	53607	http://www.ebi.ac.uk/QuickGO/GTerm?id=GO:0009052	[]
4	4	response to isolation stress	GO:0035900	0.0233	0.1	0	0	0	0	Aco2|1	1	10	126	53607	http://www.ebi.ac.uk/QuickGO/GTerm?id=GO:0035900	[]
6	6	protein localization to paranode region of axon	GO:0002175	0.0233	0.1	0	0	0	0	Epb41l3|1	1	10	126	53607	http://www.ebi.ac.uk/QuickGO/GTerm?id=GO:0002175	[]
6	5,6	fermentation	GO:0006113	0.0233	0.1	0	0	0	0	Ldha|1	1	10	126	53607	http://www.ebi.ac.uk/QuickGO/GTerm?id=GO:0006113	[]
8	7,8	mitochondrial RNA catabolic process	GO:0000957	0.0233	0.1	0	0	0	0	Lrpprc|1	1	10	126	53607	http://www.ebi.ac.uk/QuickGO/GTerm?id=GO:0000957	[]
7	7	protein de-ADP-ribosylation	GO:0051725	0.0233	0.1	0	0	0	0	Macrod1|1	1	10	126	53607	http://www.ebi.ac.uk/QuickGO/GTerm?id=GO:0051725	[]
9	8,9	regulation of peptidyl-serine dephosphorylation	GO:1902308	0.0233	0.1	0	0	0	0	Ywhae|1	1	10	126	53607	http://www.ebi.ac.uk/QuickGO/GTerm?id=GO:1902308	[]
7	5,7	negative regulation of hyaluronan biosynthetic process	GO:1900126	0.0233	0.1	0	0	0	0	Cltc|1	1	10	126	53607	http://www.ebi.ac.uk/QuickGO/GTerm?id=GO:1900126	[]
7	6,7	succinyl-CoA metabolic process	GO:0006104	0.0233	0.1	0	0	0	0	Sucla2|1	1	10	126	53607	http://www.ebi.ac.uk/QuickGO/GTerm?id=GO:0006104	[]
10	9,10	N-terminal peptidyl-lysine acetylation	GO:0018076	0.0233	0.1	0	0	0	0	Ep300|1	1	10	126	53607	http://www.ebi.ac.uk/QuickGO/GTerm?id=GO:0018076	[]
6	6	negative regulation of fatty acid beta-oxidation	GO:0031999	0.0233	0.1	0	0	0	0	Dbi|1	1	10	126	53607	http://www.ebi.ac.uk/QuickGO/GTerm?id=GO:0031999	[]
6	5,6	neurotransmitter loading into synaptic vesicle	GO:0098700	0.0233	0.1	0	0	0	0	Slc32a1|1	1	10	126	53607	http://www.ebi.ac.uk/QuickGO/GTerm?id=GO:0098700	[]
7	4,5,7	negative regulation of hemostasis	GO:1900047	0.0234	0.1	0	0	0	0	Abat|1;Anxa5|1	2	100	126	53607	http://www.ebi.ac.uk/QuickGO/GTerm?id=GO:1900047	[]
8	5,6,7,8	negative regulation of blood coagulation	GO:0030195	0.0234	0.1	0	0	0	0	Abat|1;Anxa5|1	2	100	126	53607	http://www.ebi.ac.uk/QuickGO/GTerm?id=GO:0030195	[]
9	8,9	telomere maintenance via telomerase	GO:0007004	0.0234	0.1	0	0	0	0	Ptges3|1;Hsp90ab1|1	2	100	126	53607	http://www.ebi.ac.uk/QuickGO/GTerm?id=GO:0007004	[]
8	7,8	Rac protein signal transduction	GO:0016601	0.0234	0.1	0	0	0	0	Cyfip1|1;Rac1|1	2	100	126	53607	http://www.ebi.ac.uk/QuickGO/GTerm?id=GO:0016601	[]
4	4	telencephalon development	GO:0021537	0.0234	0.1	0	0	0	0	Dbi|1;Ywhae|1;Slc1a2|1;Rac1|1;Slc32a1|1	5	686	126	53607	http://www.ebi.ac.uk/QuickGO/GTerm?id=GO:0021537	[]
5	4,5	regulation of vesicle-mediated transport	GO:0060627	0.0234	0.1	0	0	0	0	Cyfip1|1;Lypla1|1;Ppp3ca|1;Sept5|1;Sh3gl2|1;Vsnl1|1;Calr|1	7	1198	126	53607	http://www.ebi.ac.uk/QuickGO/GTerm?id=GO:0060627	[]
12	6,7,9,10,11,12	negative regulation of insulin secretion	GO:0046676	0.0238	0.102	0	0	0	0	Ppp3ca|1;Vsnl1|1	2	101	126	53607	http://www.ebi.ac.uk/QuickGO/GTerm?id=GO:0046676	[]
8	6,8	neuron differentiation	GO:0030182	0.024	0.102	0	0	0	0	Ep300|1;Ywhag|1;Negr1|1;Cyfip1|1;Rock2|1;Gnao1|1;Ppp3ca|1;Syn1|1;Psd3|1;Cnp|1;Hsp90ab1|1;Rac1|1;Sh3gl2|1;Epb41l3|1;Calr|1	15	3638	126	53607	http://www.ebi.ac.uk/QuickGO/GTerm?id=GO:0030182	[]
5	5	polysaccharide metabolic process	GO:0005976	0.024	0.102	0	0	0	0	Cltc|1;Ptges3|1;Pygb|1	3	261	126	53607	http://www.ebi.ac.uk/QuickGO/GTerm?id=GO:0005976	[]
6	5,6	negative regulation of neuron death	GO:1901215	0.0241	0.103	0	0	0	0	Dnajc5|1;Prdx3|1;Hsp90ab1|1;Hspd1|1	4	463	126	53607	http://www.ebi.ac.uk/QuickGO/GTerm?id=GO:1901215	[]
8	7,8	RNA-dependent DNA biosynthetic process	GO:0006278	0.0242	0.103	0	0	0	0	Ptges3|1;Hsp90ab1|1	2	102	126	53607	http://www.ebi.ac.uk/QuickGO/GTerm?id=GO:0006278	[]
4	4	regulation of anatomical structure size	GO:0090066	0.0247	0.105	0	0	0	0	Ep300|1;Spta1|1;Cyfip1|1;Sptbn1|1;Hsp90ab1|1;Rac1|1;Slc12a2|1	7	1211	126	53607	http://www.ebi.ac.uk/QuickGO/GTerm?id=GO:0090066	[]
4	4	cellular response to extracellular stimulus	GO:0031668	0.0249	0.106	0	0	0	0	Ldha|1;Atp2b1|1;Anxa5|1;Pdk1|1;Slc1a2|1;Mdh1|1	6	948	126	53607	http://www.ebi.ac.uk/QuickGO/GTerm?id=GO:0031668	[]
6	6	dendrite extension	GO:0097484	0.0251	0.106	0	0	0	0	Cyfip1|1;Sh3gl2|1	2	104	126	53607	http://www.ebi.ac.uk/QuickGO/GTerm?id=GO:0097484	[]
8	6,7,8	positive regulation of translation	GO:0045727	0.0252	0.106	0	0	0	0	Ep300|1;Ppp3ca|1;Eef2|1	3	266	126	53607	http://www.ebi.ac.uk/QuickGO/GTerm?id=GO:0045727	[]
8	6,7,8	positive regulation of mitophagy	GO:1903599	0.0252	0.106	0	0	0	0	Anxa5|1;Pdk1|1;Mdh1|1	3	266	126	53607	http://www.ebi.ac.uk/QuickGO/GTerm?id=GO:1903599	[]
10	7,8,9,10	cyclooxygenase pathway	GO:0019371	0.0256	0.106	0	0	0	0	Fam213b|1	1	11	126	53607	http://www.ebi.ac.uk/QuickGO/GTerm?id=GO:0019371	[]
5	5	chaperone cofactor-dependent protein refolding	GO:0070389	0.0256	0.106	0	0	0	0	Ptges3|1	1	11	126	53607	http://www.ebi.ac.uk/QuickGO/GTerm?id=GO:0070389	[]
9	7,8,9	positive regulation of aspartic-type endopeptidase activity involved in amyloid precursor protein catabolic process	GO:1902961	0.0256	0.106	0	0	0	0	Rock2|1	1	11	126	53607	http://www.ebi.ac.uk/QuickGO/GTerm?id=GO:1902961	[]
5	5	glyoxylate metabolic process	GO:0046487	0.0256	0.106	0	0	0	0	Idh2|1	1	11	126	53607	http://www.ebi.ac.uk/QuickGO/GTerm?id=GO:0046487	[]
5	5	cellular response to salt	GO:1902075	0.0256	0.106	0	0	0	0	Hnrnpa1|1	1	11	126	53607	http://www.ebi.ac.uk/QuickGO/GTerm?id=GO:1902075	[]
7	7	cellular response to glucagon stimulus	GO:0071377	0.0256	0.106	0	0	0	0	Ass1|1	1	11	126	53607	http://www.ebi.ac.uk/QuickGO/GTerm?id=GO:0071377	[]
8	8	positive regulation of aspartic-type peptidase activity	GO:1905247	0.0256	0.106	0	0	0	0	Rock2|1	1	11	126	53607	http://www.ebi.ac.uk/QuickGO/GTerm?id=GO:1905247	[]
8	8	L-serine biosynthetic process	GO:0006564	0.0256	0.106	0	0	0	0	Psat1|1	1	11	126	53607	http://www.ebi.ac.uk/QuickGO/GTerm?id=GO:0006564	[]
7	4,5,6,7	negative regulation of trophoblast cell migration	GO:1901164	0.0256	0.106	0	0	0	0	Calr|1	1	11	126	53607	http://www.ebi.ac.uk/QuickGO/GTerm?id=GO:1901164	[]
7	5,6,7	positive regulation of inhibitory postsynaptic potential	GO:0097151	0.0256	0.106	0	0	0	0	Abat|1	1	11	126	53607	http://www.ebi.ac.uk/QuickGO/GTerm?id=GO:0097151	[]
6	6	response to oleic acid	GO:0034201	0.0256	0.106	0	0	0	0	Ass1|1	1	11	126	53607	http://www.ebi.ac.uk/QuickGO/GTerm?id=GO:0034201	[]
5	5	response to sodium arsenite	GO:1903935	0.0256	0.106	0	0	0	0	Hnrnpa1|1	1	11	126	53607	http://www.ebi.ac.uk/QuickGO/GTerm?id=GO:1903935	[]
4	4	negative regulation of coagulation	GO:0050819	0.0256	0.106	0	0	0	0	Abat|1;Anxa5|1	2	105	126	53607	http://www.ebi.ac.uk/QuickGO/GTerm?id=GO:0050819	[]
11	7,8,10,11	production of miRNAs involved in gene silencing by miRNA	GO:0035196	0.0256	0.106	0	0	0	0	Hnrnpa2b1|1;Ppp3ca|1	2	105	126	53607	http://www.ebi.ac.uk/QuickGO/GTerm?id=GO:0035196	[]
6	5,6	intracellular steroid hormone receptor signaling pathway	GO:0030518	0.0256	0.106	0	0	0	0	Ep300|1;Ptges3|1;Calr|1	3	268	126	53607	http://www.ebi.ac.uk/QuickGO/GTerm?id=GO:0030518	[]
5	5	negative regulation of cellular catabolic process	GO:0031330	0.0257	0.106	0	0	0	0	Pabpc1|1;Dbi|1;Lrpprc|1;Hsp90ab1|1	4	472	126	53607	http://www.ebi.ac.uk/QuickGO/GTerm?id=GO:0031330	[]
10	6,7,8,9,10	insulin secretion	GO:0030073	0.0258	0.107	0	0	0	0	Ppp3ca|1;Glud1|1;Abat|1;Vsnl1|1	4	473	126	53607	http://www.ebi.ac.uk/QuickGO/GTerm?id=GO:0030073	[]
6	6	translation	GO:0006412	0.0259	0.107	0	0	0	0	Ep300|1;Hbb-b1|1;Hnrnpa2b1|1;Cyfip1|1;Lrpprc|1;Ppp3ca|1;Eef2|1;Pura|1;Calr|1	9	1792	126	53607	http://www.ebi.ac.uk/QuickGO/GTerm?id=GO:0006412	[]
9	6,8,9	production of small RNA involved in gene silencing by RNA	GO:0070918	0.026	0.107	0	0	0	0	Hnrnpa2b1|1;Ppp3ca|1	2	106	126	53607	http://www.ebi.ac.uk/QuickGO/GTerm?id=GO:0070918	[]
8	7,8	dsRNA fragmentation	GO:0031050	0.026	0.107	0	0	0	0	Hnrnpa2b1|1;Ppp3ca|1	2	106	126	53607	http://www.ebi.ac.uk/QuickGO/GTerm?id=GO:0031050	[]
6	6	vesicle-mediated transport to the plasma membrane	GO:0098876	0.026	0.107	0	0	0	0	Lypla1|1;Sptbn1|1	2	106	126	53607	http://www.ebi.ac.uk/QuickGO/GTerm?id=GO:0098876	[]
6	6	mitophagy in response to mitochondrial depolarization	GO:0098779	0.0261	0.107	0	0	0	0	Anxa5|1;Pdk1|1;Mdh1|1	3	270	126	53607	http://www.ebi.ac.uk/QuickGO/GTerm?id=GO:0098779	[]
6	6	regulation of mitochondrion organization	GO:0010821	0.0263	0.108	0	0	0	0	Lrpprc|1;Anxa5|1;Pdk1|1;Cyb5r1|1;Mdh1|1	5	708	126	53607	http://www.ebi.ac.uk/QuickGO/GTerm?id=GO:0010821	[]
7	5,7	regulation of epidermal cell differentiation	GO:0045604	0.0265	0.108	0	0	0	0	Rock2|1;H2afy2|1	2	107	126	53607	http://www.ebi.ac.uk/QuickGO/GTerm?id=GO:0045604	[]
7	6,7	single-organism nuclear import	GO:1902593	0.0265	0.108	0	0	0	0	Ep300|1;Sptbn1|1;Ppp3ca|1;Hsp90ab1|1	4	477	126	53607	http://www.ebi.ac.uk/QuickGO/GTerm?id=GO:1902593	[]
9	8,9	actin filament polymerization	GO:0030041	0.0265	0.108	0	0	0	0	Spta1|1;Cyfip1|1;Sptbn1|1;Rac1|1	4	477	126	53607	http://www.ebi.ac.uk/QuickGO/GTerm?id=GO:0030041	[]
5	5	response to mitochondrial depolarisation	GO:0098780	0.0266	0.108	0	0	0	0	Anxa5|1;Pdk1|1;Mdh1|1	3	272	126	53607	http://www.ebi.ac.uk/QuickGO/GTerm?id=GO:0098780	[]
7	6,7	telomere maintenance	GO:0000723	0.0266	0.108	0	0	0	0	Hnrnpa2b1|1;Ptges3|1;Hsp90ab1|1	3	272	126	53607	http://www.ebi.ac.uk/QuickGO/GTerm?id=GO:0000723	[]
6	6	aspartate family amino acid metabolic process	GO:0009066	0.0269	0.109	0	0	0	0	Got2|1;Ass1|1	2	108	126	53607	http://www.ebi.ac.uk/QuickGO/GTerm?id=GO:0009066	[]
9	6,8,9	regulation of actin polymerization or depolymerization	GO:0008064	0.0272	0.109	0	0	0	0	Spta1|1;Cyfip1|1;Sptbn1|1;Rac1|1	4	481	126	53607	http://www.ebi.ac.uk/QuickGO/GTerm?id=GO:0008064	[]
5	5	vesicle-mediated transport	GO:0016192	0.0273	0.109	0	0	0	0	Ywhaz|1;Cltc|1;Cyfip1|1;Lypla1|1;Ube2o|1;Sptbn1|1;Ppp3ca|1;Psd3|1;Sept5|1;Copa|1;Rac1|1;Sh3gl2|1;Amph|1;Vsnl1|1;Calr|1	15	3700	126	53607	http://www.ebi.ac.uk/QuickGO/GTerm?id=GO:0016192	[]
10	9,10	ATP hydrolysis coupled proton transport	GO:0015991	0.0274	0.109	0	0	0	0	Atp6v0a1|1;Atp5a1|1	2	109	126	53607	http://www.ebi.ac.uk/QuickGO/GTerm?id=GO:0015991	[]
8	7,8	protein trimerization	GO:0070206	0.0274	0.109	0	0	0	0	Clybl|1;Slc1a2|1	2	109	126	53607	http://www.ebi.ac.uk/QuickGO/GTerm?id=GO:0070206	[]
10	9,10	cellular calcium ion homeostasis	GO:0006874	0.0278	0.109	0	0	0	0	Dbi|1;Immt|1;Atp2b1|1;Ywhae|1;Anxa6|1;Calb1|1	6	973	126	53607	http://www.ebi.ac.uk/QuickGO/GTerm?id=GO:0006874	[]
8	5,7,8	metanephric distal convoluted tubule development	GO:0072221	0.0278	0.109	0	0	0	0	Calb1|1	1	12	126	53607	http://www.ebi.ac.uk/QuickGO/GTerm?id=GO:0072221	[]
4	4	distal convoluted tubule development	GO:0072025	0.0278	0.109	0	0	0	0	Calb1|1	1	12	126	53607	http://www.ebi.ac.uk/QuickGO/GTerm?id=GO:0072025	[]
6	6	leucine metabolic process	GO:0006551	0.0278	0.109	0	0	0	0	Mccc1|1	1	12	126	53607	http://www.ebi.ac.uk/QuickGO/GTerm?id=GO:0006551	[]
6	6	positive regulation of dopamine metabolic process	GO:0045964	0.0278	0.109	0	0	0	0	Abat|1	1	12	126	53607	http://www.ebi.ac.uk/QuickGO/GTerm?id=GO:0045964	[]
10	8,10	glutamate biosynthetic process	GO:0006537	0.0278	0.109	0	0	0	0	Glud1|1	1	12	126	53607	http://www.ebi.ac.uk/QuickGO/GTerm?id=GO:0006537	[]
7	5,6,7	T cell mediated immune response to tumor cell	GO:0002424	0.0278	0.109	0	0	0	0	Hspd1|1	1	12	126	53607	http://www.ebi.ac.uk/QuickGO/GTerm?id=GO:0002424	[]
8	6,8	positive regulation of catecholamine metabolic process	GO:0045915	0.0278	0.109	0	0	0	0	Abat|1	1	12	126	53607	http://www.ebi.ac.uk/QuickGO/GTerm?id=GO:0045915	[]
7	5,6,7	Golgi reassembly	GO:0090168	0.0278	0.109	0	0	0	0	Ywhaz|1	1	12	126	53607	http://www.ebi.ac.uk/QuickGO/GTerm?id=GO:0090168	[]
8	7,8	regulation of apoptotic process in bone marrow	GO:0071865	0.0278	0.109	0	0	0	0	Hspd1|1	1	12	126	53607	http://www.ebi.ac.uk/QuickGO/GTerm?id=GO:0071865	[]
9	5,8,9	positive regulation of protein localization to cell cortex	GO:1904778	0.0278	0.109	0	0	0	0	Gnai1|1	1	12	126	53607	http://www.ebi.ac.uk/QuickGO/GTerm?id=GO:1904778	[]
7	5,6,7	modulation of inhibitory postsynaptic potential	GO:0098828	0.0278	0.109	0	0	0	0	Abat|1	1	12	126	53607	http://www.ebi.ac.uk/QuickGO/GTerm?id=GO:0098828	[]
8	8	regulation of myosin-light-chain-phosphatase activity	GO:0035507	0.0278	0.109	0	0	0	0	Rock2|1	1	12	126	53607	http://www.ebi.ac.uk/QuickGO/GTerm?id=GO:0035507	[]
8	7,8	negative regulation of apoptotic process in bone marrow	GO:0071866	0.0278	0.109	0	0	0	0	Hspd1|1	1	12	126	53607	http://www.ebi.ac.uk/QuickGO/GTerm?id=GO:0071866	[]
9	7,9	lactate biosynthetic process from pyruvate	GO:0019244	0.0278	0.109	0	0	0	0	Ldha|1	1	12	126	53607	http://www.ebi.ac.uk/QuickGO/GTerm?id=GO:0019244	[]
7	6,7	L-kynurenine metabolic process	GO:0097052	0.0278	0.109	0	0	0	0	Got2|1	1	12	126	53607	http://www.ebi.ac.uk/QuickGO/GTerm?id=GO:0097052	[]
7	6,7	regulation of T cell mediated immune response to tumor cell	GO:0002840	0.0278	0.109	0	0	0	0	Hspd1|1	1	12	126	53607	http://www.ebi.ac.uk/QuickGO/GTerm?id=GO:0002840	[]
12	4,6,8,9,11,12	negative regulation of production of miRNAs involved in gene silencing by miRNA	GO:1903799	0.0278	0.109	0	0	0	0	Ppp3ca|1	1	12	126	53607	http://www.ebi.ac.uk/QuickGO/GTerm?id=GO:1903799	[]
8	7,8	positive regulation of cytoplasmic translation	GO:2000767	0.0278	0.109	0	0	0	0	Eef2|1	1	12	126	53607	http://www.ebi.ac.uk/QuickGO/GTerm?id=GO:2000767	[]
4	4	cell-cell signaling	GO:0007267	0.0279	0.11	0	0	0	0	Ywhaz|1;Dbi|1;Ywhag|1;Cyfip1|1;Gnai1|1;Ppp3ca|1;Glud1|1;Abat|1;Anxa5|1;Syn1|1;Rac1|1;Calb1|1;Vsnl1|1	13	3057	126	53607	http://www.ebi.ac.uk/QuickGO/GTerm?id=GO:0007267	[]
3	3	circadian rhythm	GO:0007623	0.028	0.11	0	0	0	0	Ep300|1;Rock2|1;Top1|1;Ass1|1	4	485	126	53607	http://www.ebi.ac.uk/QuickGO/GTerm?id=GO:0007623	[]
7	5,6,7	positive regulation of axon extension	GO:0045773	0.0283	0.111	0	0	0	0	Ep300|1;Cyfip1|1	2	111	126	53607	http://www.ebi.ac.uk/QuickGO/GTerm?id=GO:0045773	[]
3	3	locomotory behavior	GO:0007626	0.0286	0.112	0	0	0	0	Negr1|1;Gnao1|1;Abat|1;Cnp|1;Calb1|1	5	724	126	53607	http://www.ebi.ac.uk/QuickGO/GTerm?id=GO:0007626	[]
9	8,9	energy coupled proton transmembrane transport, against electrochemical gradient	GO:0015988	0.0288	0.112	0	0	0	0	Atp6v0a1|1;Atp5a1|1	2	112	126	53607	http://www.ebi.ac.uk/QuickGO/GTerm?id=GO:0015988	[]
6	6	telomere organization	GO:0032200	0.0289	0.113	0	0	0	0	Hnrnpa2b1|1;Ptges3|1;Hsp90ab1|1	3	281	126	53607	http://www.ebi.ac.uk/QuickGO/GTerm?id=GO:0032200	[]
7	7	nucleoside diphosphate phosphorylation	GO:0006165	0.0292	0.114	0	0	0	0	Eno1|1;Pdha1|1;Tpi1|1	3	282	126	53607	http://www.ebi.ac.uk/QuickGO/GTerm?id=GO:0006165	[]
6	5,6	positive regulation of nitric oxide metabolic process	GO:1904407	0.0293	0.114	0	0	0	0	Hsp90ab1|1;Ass1|1	2	113	126	53607	http://www.ebi.ac.uk/QuickGO/GTerm?id=GO:1904407	[]
7	6,7	icosanoid biosynthetic process	GO:0046456	0.0293	0.114	0	0	0	0	Ptges3|1;Fam213b|1	2	113	126	53607	http://www.ebi.ac.uk/QuickGO/GTerm?id=GO:0046456	[]
7	6,7	positive regulation of nitric oxide biosynthetic process	GO:0045429	0.0293	0.114	0	0	0	0	Hsp90ab1|1;Ass1|1	2	113	126	53607	http://www.ebi.ac.uk/QuickGO/GTerm?id=GO:0045429	[]
7	7	protein dephosphorylation	GO:0006470	0.0293	0.114	0	0	0	0	Rock2|1;Ppa2|1;Ppp3ca|1;Ywhae|1;Hsp90ab1|1	5	729	126	53607	http://www.ebi.ac.uk/QuickGO/GTerm?id=GO:0006470	[]
5	3,5	positive regulation of homeostatic process	GO:0032846	0.0294	0.114	0	0	0	0	Dbi|1;Hnrnpa2b1|1;Abat|1;Vsnl1|1	4	493	126	53607	http://www.ebi.ac.uk/QuickGO/GTerm?id=GO:0032846	[]
6	5,6	RNA transport	GO:0050658	0.0297	0.115	0	0	0	0	Hnrnpa1|1;Hnrnpa2b1|1;Lrpprc|1	3	284	126	53607	http://www.ebi.ac.uk/QuickGO/GTerm?id=GO:0050658	[]
7	7	nucleic acid transport	GO:0050657	0.0297	0.115	0	0	0	0	Hnrnpa1|1;Hnrnpa2b1|1;Lrpprc|1	3	284	126	53607	http://www.ebi.ac.uk/QuickGO/GTerm?id=GO:0050657	[]
8	6,7,8	positive regulation of DNA biosynthetic process	GO:2000573	0.0298	0.115	0	0	0	0	Ptges3|1;Hsp90ab1|1	2	114	126	53607	http://www.ebi.ac.uk/QuickGO/GTerm?id=GO:2000573	[]
5	5	regulation of actin filament length	GO:0030832	0.0298	0.115	0	0	0	0	Spta1|1;Cyfip1|1;Sptbn1|1;Rac1|1	4	495	126	53607	http://www.ebi.ac.uk/QuickGO/GTerm?id=GO:0030832	[]
7	6,7	neuron projection development	GO:0031175	0.03	0.115	0	0	0	0	Ep300|1;Negr1|1;Cyfip1|1;Rock2|1;Gnao1|1;Ppp3ca|1;Cnp|1;Hsp90ab1|1;Rac1|1;Sh3gl2|1;Epb41l3|1	11	2452	126	53607	http://www.ebi.ac.uk/QuickGO/GTerm?id=GO:0031175	[]
8	6,8	positive regulation of uterine smooth muscle contraction	GO:0070474	0.0301	0.115	0	0	0	0	Abat|1	1	13	126	53607	http://www.ebi.ac.uk/QuickGO/GTerm?id=GO:0070474	[]
9	8,9	D-aspartate import	GO:0070779	0.0301	0.115	0	0	0	0	Slc1a2|1	1	13	126	53607	http://www.ebi.ac.uk/QuickGO/GTerm?id=GO:0070779	[]
6	5,6	negative regulation of transforming growth factor beta production	GO:0071635	0.0301	0.115	0	0	0	0	Hsp90ab1|1	1	13	126	53607	http://www.ebi.ac.uk/QuickGO/GTerm?id=GO:0071635	[]
8	7,8	regulation of protein localization to cell cortex	GO:1904776	0.0301	0.115	0	0	0	0	Gnai1|1	1	13	126	53607	http://www.ebi.ac.uk/QuickGO/GTerm?id=GO:1904776	[]
4	4	protein oxidation	GO:0018158	0.0301	0.115	0	0	0	0	Prdx3|1	1	13	126	53607	http://www.ebi.ac.uk/QuickGO/GTerm?id=GO:0018158	[]
7	6,7	positive regulation of dendritic cell chemotaxis	GO:2000510	0.0301	0.115	0	0	0	0	Calr|1	1	13	126	53607	http://www.ebi.ac.uk/QuickGO/GTerm?id=GO:2000510	[]
8	8	D-aspartate transport	GO:0070777	0.0301	0.115	0	0	0	0	Slc1a2|1	1	13	126	53607	http://www.ebi.ac.uk/QuickGO/GTerm?id=GO:0070777	[]
9	6,7,9	transepithelial chloride transport	GO:0030321	0.0301	0.115	0	0	0	0	Slc12a2|1	1	13	126	53607	http://www.ebi.ac.uk/QuickGO/GTerm?id=GO:0030321	[]
6	6	cellular response to peptide	GO:1901653	0.0302	0.115	0	0	0	0	H2afz|1;Ywhag|1;Cyfip1|1;Anxa5|1;Ass1|1	5	735	126	53607	http://www.ebi.ac.uk/QuickGO/GTerm?id=GO:1901653	[]
7	5,7	negative regulation of calcium ion transport	GO:0051926	0.0302	0.115	0	0	0	0	Gnao1|1;Ywhae|1	2	115	126	53607	http://www.ebi.ac.uk/QuickGO/GTerm?id=GO:0051926	[]
5	4,5	regulation of actin filament-based process	GO:0032970	0.0304	0.115	0	0	0	0	Ep300|1;Spta1|1;Cyfip1|1;Rock2|1;Sptbn1|1;Rac1|1	6	994	126	53607	http://www.ebi.ac.uk/QuickGO/GTerm?id=GO:0032970	[]
7	6,7	peptide biosynthetic process	GO:0043043	0.0305	0.115	0	0	0	0	Ep300|1;Hbb-b1|1;Hnrnpa2b1|1;Cyfip1|1;Lrpprc|1;Ppp3ca|1;Eef2|1;Pura|1;Calr|1	9	1846	126	53607	http://www.ebi.ac.uk/QuickGO/GTerm?id=GO:0043043	[]
5	4,5	establishment of RNA localization	GO:0051236	0.0308	0.116	0	0	0	0	Hnrnpa1|1;Hnrnpa2b1|1;Lrpprc|1	3	288	126	53607	http://www.ebi.ac.uk/QuickGO/GTerm?id=GO:0051236	[]
5	5	alcohol metabolic process	GO:0006066	0.0311	0.117	0	0	0	0	Dbi|1;Gpd2|1;Cyb5r1|1;Aldh7a1|1;Tpi1|1	5	741	126	53607	http://www.ebi.ac.uk/QuickGO/GTerm?id=GO:0006066	[]
9	8,9	actin filament capping	GO:0051693	0.0312	0.117	0	0	0	0	Spta1|1;Sptbn1|1	2	117	126	53607	http://www.ebi.ac.uk/QuickGO/GTerm?id=GO:0051693	[]
5	5	porphyrin-containing compound metabolic process	GO:0006778	0.0312	0.117	0	0	0	0	Spta1|1;Iba57|1	2	117	126	53607	http://www.ebi.ac.uk/QuickGO/GTerm?id=GO:0006778	[]
6	5,6	regulation of substrate adhesion-dependent cell spreading	GO:1900024	0.0312	0.117	0	0	0	0	Rac1|1;Calr|1	2	117	126	53607	http://www.ebi.ac.uk/QuickGO/GTerm?id=GO:1900024	[]
9	7,8,9	cellular response to glucose stimulus	GO:0071333	0.0322	0.12	0	0	0	0	Ep300|1;Ppp3ca|1;Vsnl1|1	3	293	126	53607	http://www.ebi.ac.uk/QuickGO/GTerm?id=GO:0071333	[]
4	4	fatty acid derivative metabolic process	GO:1901568	0.0322	0.12	0	0	0	0	Ptges3|1;Acat1|1;Fam213b|1	3	293	126	53607	http://www.ebi.ac.uk/QuickGO/GTerm?id=GO:1901568	[]
7	6,7	protein targeting to mitochondrion	GO:0006626	0.0322	0.12	0	0	0	0	Ywhaz|1;Cyb5r1|1;Hspd1|1	3	293	126	53607	http://www.ebi.ac.uk/QuickGO/GTerm?id=GO:0006626	[]
5	3,5	muscle adaptation	GO:0043500	0.0322	0.12	0	0	0	0	Ep300|1;Rock2|1;Ppp3ca|1	3	293	126	53607	http://www.ebi.ac.uk/QuickGO/GTerm?id=GO:0043500	[]
4	4	cellular ketone metabolic process	GO:0042180	0.0323	0.12	0	0	0	0	Dbi|1;Afp|1;Got2|1;Pdk1|1	4	508	126	53607	http://www.ebi.ac.uk/QuickGO/GTerm?id=GO:0042180	[]
9	5,6,7,8,9	positive regulation of neurotrophin TRK receptor signaling pathway	GO:0051388	0.0324	0.12	0	0	0	0	Cyfip1|1	1	14	126	53607	http://www.ebi.ac.uk/QuickGO/GTerm?id=GO:0051388	[]
7	7	regulation of aspartic-type peptidase activity	GO:1905245	0.0324	0.12	0	0	0	0	Rock2|1	1	14	126	53607	http://www.ebi.ac.uk/QuickGO/GTerm?id=GO:1905245	[]
10	9,10	NADP biosynthetic process	GO:0006741	0.0324	0.12	0	0	0	0	Idh2|1	1	14	126	53607	http://www.ebi.ac.uk/QuickGO/GTerm?id=GO:0006741	[]
6	6	cellular response to laminar fluid shear stress	GO:0071499	0.0324	0.12	0	0	0	0	Ass1|1	1	14	126	53607	http://www.ebi.ac.uk/QuickGO/GTerm?id=GO:0071499	[]
8	7,8	metanephric distal tubule development	GO:0072235	0.0324	0.12	0	0	0	0	Calb1|1	1	14	126	53607	http://www.ebi.ac.uk/QuickGO/GTerm?id=GO:0072235	[]
10	7,8,10	L-glutamate import across plasma membrane	GO:0098712	0.0324	0.12	0	0	0	0	Slc1a2|1	1	14	126	53607	http://www.ebi.ac.uk/QuickGO/GTerm?id=GO:0098712	[]
10	10	calcium ion export	GO:1901660	0.0324	0.12	0	0	0	0	Atp2b1|1	1	14	126	53607	http://www.ebi.ac.uk/QuickGO/GTerm?id=GO:1901660	[]
8	7,8	regulation of aspartic-type endopeptidase activity involved in amyloid precursor protein catabolic process	GO:1902959	0.0324	0.12	0	0	0	0	Rock2|1	1	14	126	53607	http://www.ebi.ac.uk/QuickGO/GTerm?id=GO:1902959	[]
6	4,5,6	positive regulation of intracellular transport	GO:0032388	0.0325	0.12	0	0	0	0	Ep300|1;Ppp3ca|1;Ywhae|1;Cyb5r1|1;Hsp90ab1|1	5	750	126	53607	http://www.ebi.ac.uk/QuickGO/GTerm?id=GO:0032388	[]
3	3	response to activity	GO:0014823	0.0327	0.121	0	0	0	0	Got2|1;Hspd1|1	2	120	126	53607	http://www.ebi.ac.uk/QuickGO/GTerm?id=GO:0014823	[]
7	5,6,7	steroid hormone mediated signaling pathway	GO:0043401	0.0327	0.121	0	0	0	0	Ep300|1;Ptges3|1;Calr|1	3	295	126	53607	http://www.ebi.ac.uk/QuickGO/GTerm?id=GO:0043401	[]
5	5	cellular nitrogen compound biosynthetic process	GO:0044271	0.033	0.121	0	0	0	0	Ywhaq|1;Cbx1|1;H2afz|1;Ep300|1;Spta1|1;H2afj|1;Atp5j|1;Hbb-b1|1;Tfam|1;Hmgn2|1;Hnrnpa2b1|1;Cyfip1|1;Idh2|1;Atp5d|1;Taf6|1;Ptges3|1;Lrpprc|1;Atp5h|1;Ndufc2|1;Prdx3|1;Ube2o|1;Ppp3ca|1;Atp5f1|1;Atp5o|1;Eef2|1;Iba57|1;Eno1|1;Tceal3|1;H2afy2|1;Pura|1;Atp6v0a1|1;Aldh7a1|1;Top1|1;Acat1|1;Basp1|1;Atp5e|1;Hsp90ab1|1;Ass1|1;Atp5a1|1;Calr|1	40	12971	126	53607	http://www.ebi.ac.uk/QuickGO/GTerm?id=GO:0044271	[]
8	8	cellular response to hexose stimulus	GO:0071331	0.033	0.121	0	0	0	0	Ep300|1;Ppp3ca|1;Vsnl1|1	3	296	126	53607	http://www.ebi.ac.uk/QuickGO/GTerm?id=GO:0071331	[]
2	2	rhythmic process	GO:0048511	0.0332	0.122	0	0	0	0	Ep300|1;Afp|1;Rock2|1;Top1|1;Ass1|1	5	754	126	53607	http://www.ebi.ac.uk/QuickGO/GTerm?id=GO:0048511	[]
6	4,6	positive regulation of epithelial cell migration	GO:0010634	0.0333	0.122	0	0	0	0	Rock2|1;Atp5a1|1;Calr|1	3	297	126	53607	http://www.ebi.ac.uk/QuickGO/GTerm?id=GO:0010634	[]
7	7	regulation of macroautophagy	GO:0016241	0.0333	0.122	0	0	0	0	Anxa5|1;Pdk1|1;Atp6v0a1|1;Mdh1|1	4	513	126	53607	http://www.ebi.ac.uk/QuickGO/GTerm?id=GO:0016241	[]
7	7	cellular response to monosaccharide stimulus	GO:0071326	0.0336	0.123	0	0	0	0	Ep300|1;Ppp3ca|1;Vsnl1|1	3	298	126	53607	http://www.ebi.ac.uk/QuickGO/GTerm?id=GO:0071326	[]
9	9	calcium ion homeostasis	GO:0055074	0.0336	0.123	0	0	0	0	Dbi|1;Immt|1;Atp2b1|1;Ywhae|1;Anxa6|1;Calb1|1	6	1018	126	53607	http://www.ebi.ac.uk/QuickGO/GTerm?id=GO:0055074	[]
7	5,6,7	negative regulation of reactive oxygen species metabolic process	GO:2000378	0.0337	0.123	0	0	0	0	Ndufc2|1;Hspd1|1	2	122	126	53607	http://www.ebi.ac.uk/QuickGO/GTerm?id=GO:2000378	[]
9	8,9	cellular divalent inorganic cation homeostasis	GO:0072503	0.0343	0.124	0	0	0	0	Dbi|1;Immt|1;Atp2b1|1;Ywhae|1;Anxa6|1;Calb1|1	6	1023	126	53607	http://www.ebi.ac.uk/QuickGO/GTerm?id=GO:0072503	[]
5	5	erythrocyte differentiation	GO:0030218	0.0344	0.124	0	0	0	0	Hbb-b1|1;Hba|1;Hspa9|1	3	301	126	53607	http://www.ebi.ac.uk/QuickGO/GTerm?id=GO:0030218	[]
7	6,7	regulation of neuron apoptotic process	GO:0043523	0.0346	0.124	0	0	0	0	Dnajc5|1;Prdx3|1;Hsp90ab1|1;Hspd1|1	4	519	126	53607	http://www.ebi.ac.uk/QuickGO/GTerm?id=GO:0043523	[]
7	6,7	histamine secretion involved in inflammatory response	GO:0002441	0.0347	0.124	0	0	0	0	Ywhaz|1	1	15	126	53607	http://www.ebi.ac.uk/QuickGO/GTerm?id=GO:0002441	[]
6	6	cellular response to trichostatin A	GO:0035984	0.0347	0.124	0	0	0	0	Ep300|1	1	15	126	53607	http://www.ebi.ac.uk/QuickGO/GTerm?id=GO:0035984	[]
6	6	regulation of dendritic cell chemotaxis	GO:2000508	0.0347	0.124	0	0	0	0	Calr|1	1	15	126	53607	http://www.ebi.ac.uk/QuickGO/GTerm?id=GO:2000508	[]
5	5	histamine production involved in inflammatory response	GO:0002349	0.0347	0.124	0	0	0	0	Ywhaz|1	1	15	126	53607	http://www.ebi.ac.uk/QuickGO/GTerm?id=GO:0002349	[]
6	5,6	regulation of cardiac muscle hypertrophy in response to stress	GO:1903242	0.0347	0.124	0	0	0	0	Ppp3ca|1	1	15	126	53607	http://www.ebi.ac.uk/QuickGO/GTerm?id=GO:1903242	[]
6	6	negative regulation of fatty acid oxidation	GO:0046322	0.0347	0.124	0	0	0	0	Dbi|1	1	15	126	53607	http://www.ebi.ac.uk/QuickGO/GTerm?id=GO:0046322	[]
8	4,7,8	positive regulation of protein localization to early endosome	GO:1902966	0.0347	0.124	0	0	0	0	Rock2|1	1	15	126	53607	http://www.ebi.ac.uk/QuickGO/GTerm?id=GO:1902966	[]
7	6,7	regulation of protein localization to early endosome	GO:1902965	0.0347	0.124	0	0	0	0	Rock2|1	1	15	126	53607	http://www.ebi.ac.uk/QuickGO/GTerm?id=GO:1902965	[]
7	7	cellular response to gonadotropin-releasing hormone	GO:0097211	0.0347	0.124	0	0	0	0	Anxa5|1	1	15	126	53607	http://www.ebi.ac.uk/QuickGO/GTerm?id=GO:0097211	[]
6	6	response to cobalt ion	GO:0032025	0.0347	0.124	0	0	0	0	Ep300|1	1	15	126	53607	http://www.ebi.ac.uk/QuickGO/GTerm?id=GO:0032025	[]
8	6,7,8	regulation of membrane tubulation	GO:1903525	0.0347	0.124	0	0	0	0	Sh3gl2|1	1	15	126	53607	http://www.ebi.ac.uk/QuickGO/GTerm?id=GO:1903525	[]
8	8	malate metabolic process	GO:0006108	0.0347	0.124	0	0	0	0	Mdh1|1	1	15	126	53607	http://www.ebi.ac.uk/QuickGO/GTerm?id=GO:0006108	[]
5	5	spermidine metabolic process	GO:0008216	0.0347	0.124	0	0	0	0	Sat2|1	1	15	126	53607	http://www.ebi.ac.uk/QuickGO/GTerm?id=GO:0008216	[]
8	6,7,8	histamine secretion by mast cell	GO:0002553	0.0347	0.124	0	0	0	0	Ywhaz|1	1	15	126	53607	http://www.ebi.ac.uk/QuickGO/GTerm?id=GO:0002553	[]
7	5,6,7	paranodal junction assembly	GO:0030913	0.0347	0.124	0	0	0	0	Epb41l3|1	1	15	126	53607	http://www.ebi.ac.uk/QuickGO/GTerm?id=GO:0030913	[]
5	5	response to trichostatin A	GO:0035983	0.0347	0.124	0	0	0	0	Ep300|1	1	15	126	53607	http://www.ebi.ac.uk/QuickGO/GTerm?id=GO:0035983	[]
6	6	fatty acid biosynthetic process	GO:0006633	0.0347	0.124	0	0	0	0	Ptges3|1;Decr2|1;Fam213b|1	3	302	126	53607	http://www.ebi.ac.uk/QuickGO/GTerm?id=GO:0006633	[]
5	5	regulation of microtubule cytoskeleton organization	GO:0070507	0.0348	0.124	0	0	0	0	Cltc|1;Rock2|1;Gnai1|1;Rac1|1	4	520	126	53607	http://www.ebi.ac.uk/QuickGO/GTerm?id=GO:0070507	[]
5	5	homeostasis of number of cells	GO:0048872	0.0351	0.125	0	0	0	0	Spta1|1;Hbb-b1|1;Hba|1;Rac1|1;Hspa9|1	5	766	126	53607	http://www.ebi.ac.uk/QuickGO/GTerm?id=GO:0048872	[]
7	4,7	positive regulation of protein localization to cell periphery	GO:1904377	0.0352	0.125	0	0	0	0	Sptbn1|1;Gnai1|1	2	125	126	53607	http://www.ebi.ac.uk/QuickGO/GTerm?id=GO:1904377	[]
4	4	negative regulation of biosynthetic process	GO:0009890	0.0355	0.126	0	0	0	0	Ywhaq|1;Cbx1|1;H2afz|1;Ep300|1;H2afj|1;Hmgn2|1;Hnrnpa2b1|1;Cltc|1;Ndufc2|1;Ppp3ca|1;Eno1|1;H2afy2|1;Pura|1;Basp1|1;Hspd1|1;Calr|1	16	4168	126	53607	http://www.ebi.ac.uk/QuickGO/GTerm?id=GO:0009890	[]
7	5,6,7	positive regulation of cytoplasmic transport	GO:1903651	0.036	0.127	0	0	0	0	Ep300|1;Ppp3ca|1;Cyb5r1|1;Hsp90ab1|1	4	526	126	53607	http://www.ebi.ac.uk/QuickGO/GTerm?id=GO:1903651	[]
4	4	cell division	GO:0051301	0.0361	0.128	0	0	0	0	Sept11|1;Cltc|1;Sptbn1|1;Gnai1|1;Top1|1;Sept5|1;Calr|1	7	1315	126	53607	http://www.ebi.ac.uk/QuickGO/GTerm?id=GO:0051301	[]
5	4,5	single-organism membrane organization	GO:0044802	0.0364	0.128	0	0	0	0	Spta1|1;Cltc|1;Rock2|1;Lypla1|1;Immt|1;Sptbn1|1;Cnp|1;Rac1|1;Sh3gl2|1;Epb41l3|1	10	2215	126	53607	http://www.ebi.ac.uk/QuickGO/GTerm?id=GO:0044802	[]
6	6	skeletal muscle organ development	GO:0060538	0.0364	0.128	0	0	0	0	Ep300|1;Ppp3ca|1;Eef2|1;Ass1|1	4	528	126	53607	http://www.ebi.ac.uk/QuickGO/GTerm?id=GO:0060538	[]
8	7,8	negative regulation of actin filament depolymerization	GO:0030835	0.0368	0.128	0	0	0	0	Spta1|1;Sptbn1|1	2	128	126	53607	http://www.ebi.ac.uk/QuickGO/GTerm?id=GO:0030835	[]
5	5	organic cyclic compound biosynthetic process	GO:1901362	0.0369	0.128	0	0	0	0	Ywhaq|1;Cbx1|1;H2afz|1;Ep300|1;Spta1|1;H2afj|1;Atp5j|1;Tfam|1;Hmgn2|1;Hnrnpa2b1|1;Idh2|1;Atp5d|1;Taf6|1;Ptges3|1;Lrpprc|1;Atp5h|1;Ndufc2|1;Prdx3|1;Ube2o|1;Ppp3ca|1;Atp5f1|1;Atp5o|1;Iba57|1;Eno1|1;Tceal3|1;H2afy2|1;Pura|1;Atp6v0a1|1;Cyb5r1|1;Top1|1;Acat1|1;Basp1|1;Atp5e|1;Hsp90ab1|1;Atp5a1|1;Calr|1	36	11521	126	53607	http://www.ebi.ac.uk/QuickGO/GTerm?id=GO:1901362	[]
8	8	polyamine catabolic process	GO:0006598	0.037	0.128	0	0	0	0	Sat2|1	1	16	126	53607	http://www.ebi.ac.uk/QuickGO/GTerm?id=GO:0006598	[]
10	7,8,9,10	regulation of establishment of endothelial barrier	GO:1903140	0.037	0.128	0	0	0	0	Rock2|1	1	16	126	53607	http://www.ebi.ac.uk/QuickGO/GTerm?id=GO:1903140	[]
5	5	putrescine metabolic process	GO:0009445	0.037	0.128	0	0	0	0	Sat2|1	1	16	126	53607	http://www.ebi.ac.uk/QuickGO/GTerm?id=GO:0009445	[]
11	8,9,10,11	negative regulation of nuclear-transcribed mRNA catabolic process, nonsense-mediated decay	GO:2000623	0.037	0.128	0	0	0	0	Pabpc1|1	1	16	126	53607	http://www.ebi.ac.uk/QuickGO/GTerm?id=GO:2000623	[]
9	6,7,8,9	regulation of endothelial cell development	GO:1901550	0.037	0.128	0	0	0	0	Rock2|1	1	16	126	53607	http://www.ebi.ac.uk/QuickGO/GTerm?id=GO:1901550	[]
8	8	regulation of uterine smooth muscle contraction	GO:0070472	0.037	0.128	0	0	0	0	Abat|1	1	16	126	53607	http://www.ebi.ac.uk/QuickGO/GTerm?id=GO:0070472	[]
11	5,6,7,8,9,10,11	negative regulation of Golgi to plasma membrane protein transport	GO:0042997	0.037	0.128	0	0	0	0	Lypla1|1	1	16	126	53607	http://www.ebi.ac.uk/QuickGO/GTerm?id=GO:0042997	[]
8	5,6,8	negative regulation of synaptic vesicle transport	GO:1902804	0.037	0.128	0	0	0	0	Cyfip1|1	1	16	126	53607	http://www.ebi.ac.uk/QuickGO/GTerm?id=GO:1902804	[]
10	8,9,10	regulation of tubulin deacetylation	GO:0090043	0.037	0.128	0	0	0	0	Ep300|1	1	16	126	53607	http://www.ebi.ac.uk/QuickGO/GTerm?id=GO:0090043	[]
10	7,8,9,10	regulation of nuclear-transcribed mRNA catabolic process, nonsense-mediated decay	GO:2000622	0.037	0.128	0	0	0	0	Pabpc1|1	1	16	126	53607	http://www.ebi.ac.uk/QuickGO/GTerm?id=GO:2000622	[]
5	5	regulation of cardiac muscle adaptation	GO:0010612	0.037	0.128	0	0	0	0	Ppp3ca|1	1	16	126	53607	http://www.ebi.ac.uk/QuickGO/GTerm?id=GO:0010612	[]
6	6	response to gonadotropin-releasing hormone	GO:0097210	0.037	0.128	0	0	0	0	Anxa5|1	1	16	126	53607	http://www.ebi.ac.uk/QuickGO/GTerm?id=GO:0097210	[]
4	4	regulation of protein stability	GO:0031647	0.0371	0.128	0	0	0	0	Ep300|1;Ptges3|1;Hspd1|1;Calr|1	4	531	126	53607	http://www.ebi.ac.uk/QuickGO/GTerm?id=GO:0031647	[]
9	9	calcium ion transport	GO:0006816	0.0372	0.129	0	0	0	0	Dbi|1;Gnao1|1;Ppp3ca|1;Atp2b1|1;Ywhae|1;Anxa6|1	6	1044	126	53607	http://www.ebi.ac.uk/QuickGO/GTerm?id=GO:0006816	[]
4	4	neural retina development	GO:0003407	0.0373	0.129	0	0	0	0	Atp2b1|1;Calb1|1	2	129	126	53607	http://www.ebi.ac.uk/QuickGO/GTerm?id=GO:0003407	[]
8	7,8	Golgi to plasma membrane transport	GO:0006893	0.0373	0.129	0	0	0	0	Lypla1|1;Sptbn1|1	2	129	126	53607	http://www.ebi.ac.uk/QuickGO/GTerm?id=GO:0006893	[]
6	6	axon extension	GO:0048675	0.0374	0.129	0	0	0	0	Ep300|1;Cyfip1|1;Hsp90ab1|1	3	311	126	53607	http://www.ebi.ac.uk/QuickGO/GTerm?id=GO:0048675	[]
6	5,6	negative regulation of nucleobase-containing compound metabolic process	GO:0045934	0.0376	0.13	0	0	0	0	Ywhaq|1;Cbx1|1;Pabpc1|1;H2afz|1;Ep300|1;H2afj|1;Hmgn2|1;Hnrnpa2b1|1;Lrpprc|1;Ppp3ca|1;Eno1|1;H2afy2|1;Pura|1;Basp1|1;Calr|1	15	3860	126	53607	http://www.ebi.ac.uk/QuickGO/GTerm?id=GO:0045934	[]
5	5	response to nutrient levels	GO:0031667	0.0377	0.13	0	0	0	0	Atp2b1|1;Eef2|1;Anxa5|1;Pdk1|1;Acat1|1;Ass1|1;Mdh1|1	7	1327	126	53607	http://www.ebi.ac.uk/QuickGO/GTerm?id=GO:0031667	[]
4	4	nephron development	GO:0072006	0.038	0.13	0	0	0	0	Acat1|1;Basp1|1;Calb1|1	3	313	126	53607	http://www.ebi.ac.uk/QuickGO/GTerm?id=GO:0072006	[]
6	5,6	positive regulation of response to extracellular stimulus	GO:0032106	0.038	0.13	0	0	0	0	Anxa5|1;Pdk1|1;Mdh1|1	3	313	126	53607	http://www.ebi.ac.uk/QuickGO/GTerm?id=GO:0032106	[]
7	6,7	positive regulation of response to nutrient levels	GO:0032109	0.038	0.13	0	0	0	0	Anxa5|1;Pdk1|1;Mdh1|1	3	313	126	53607	http://www.ebi.ac.uk/QuickGO/GTerm?id=GO:0032109	[]
5	5	cellular response to heat	GO:0034605	0.0389	0.133	0	0	0	0	Ywhae|1;Hspd1|1	2	132	126	53607	http://www.ebi.ac.uk/QuickGO/GTerm?id=GO:0034605	[]
6	6	cellular response to carbohydrate stimulus	GO:0071322	0.0392	0.133	0	0	0	0	Ep300|1;Ppp3ca|1;Vsnl1|1	3	317	126	53607	http://www.ebi.ac.uk/QuickGO/GTerm?id=GO:0071322	[]
5	5	interleukin-23 production	GO:0032627	0.0392	0.133	0	0	0	0	Rac1|1	1	17	126	53607	http://www.ebi.ac.uk/QuickGO/GTerm?id=GO:0032627	[]
8	8	protein localization to early endosome	GO:1902946	0.0392	0.133	0	0	0	0	Rock2|1	1	17	126	53607	http://www.ebi.ac.uk/QuickGO/GTerm?id=GO:1902946	[]
7	6,7	positive regulation of interleukin-2 secretion	GO:1900042	0.0392	0.133	0	0	0	0	Sptbn1|1	1	17	126	53607	http://www.ebi.ac.uk/QuickGO/GTerm?id=GO:1900042	[]
6	5,6	regulation of interleukin-23 production	GO:0032667	0.0392	0.133	0	0	0	0	Rac1|1	1	17	126	53607	http://www.ebi.ac.uk/QuickGO/GTerm?id=GO:0032667	[]
8	8	acetate metabolic process	GO:0006083	0.0392	0.133	0	0	0	0	Aldh5a1|1	1	17	126	53607	http://www.ebi.ac.uk/QuickGO/GTerm?id=GO:0006083	[]
7	7	apoptotic process in bone marrow	GO:0071839	0.0392	0.133	0	0	0	0	Hspd1|1	1	17	126	53607	http://www.ebi.ac.uk/QuickGO/GTerm?id=GO:0071839	[]
8	6,7,8	synaptic vesicle uncoating	GO:0016191	0.0392	0.133	0	0	0	0	Sh3gl2|1	1	17	126	53607	http://www.ebi.ac.uk/QuickGO/GTerm?id=GO:0016191	[]
7	6,7	cellular response to cAMP	GO:0071320	0.0394	0.133	0	0	0	0	Ep300|1;Ass1|1	2	133	126	53607	http://www.ebi.ac.uk/QuickGO/GTerm?id=GO:0071320	[]
8	6,7,8	negative regulation of mRNA metabolic process	GO:1903312	0.0394	0.133	0	0	0	0	Pabpc1|1;Hnrnpa2b1|1	2	133	126	53607	http://www.ebi.ac.uk/QuickGO/GTerm?id=GO:1903312	[]
6	6	positive regulation of cytoskeleton organization	GO:0051495	0.0395	0.134	0	0	0	0	Ep300|1;Cyfip1|1;Rock2|1;Rac1|1	4	542	126	53607	http://www.ebi.ac.uk/QuickGO/GTerm?id=GO:0051495	[]
6	6	dephosphorylation	GO:0016311	0.0396	0.134	0	0	0	0	Rock2|1;Ppa2|1;Ppp3ca|1;Ywhae|1;Nt5dc3|1;Hsp90ab1|1	6	1060	126	53607	http://www.ebi.ac.uk/QuickGO/GTerm?id=GO:0016311	[]
8	6,7,8	establishment of protein localization to mitochondrion	GO:0072655	0.0398	0.134	0	0	0	0	Ywhaz|1;Cyb5r1|1;Hspd1|1	3	319	126	53607	http://www.ebi.ac.uk/QuickGO/GTerm?id=GO:0072655	[]
6	4,6	ethanolamine-containing compound metabolic process	GO:0042439	0.0399	0.134	0	0	0	0	Dbi|1;Aldh7a1|1	2	134	126	53607	http://www.ebi.ac.uk/QuickGO/GTerm?id=GO:0042439	[]
9	5,6,8,9	regulation of protein polymerization	GO:0032271	0.0399	0.134	0	0	0	0	Spta1|1;Cyfip1|1;Sptbn1|1;Rac1|1	4	544	126	53607	http://www.ebi.ac.uk/QuickGO/GTerm?id=GO:0032271	[]
5	4,5	developmental cell growth	GO:0048588	0.0402	0.135	0	0	0	0	Ep300|1;Cyfip1|1;Hsp90ab1|1;Sh3gl2|1	4	545	126	53607	http://www.ebi.ac.uk/QuickGO/GTerm?id=GO:0048588	[]
4	4	response to nutrient	GO:0007584	0.0404	0.136	0	0	0	0	Atp2b1|1;Eef2|1;Ass1|1	3	321	126	53607	http://www.ebi.ac.uk/QuickGO/GTerm?id=GO:0007584	[]
5	5	positive regulation of reactive oxygen species biosynthetic process	GO:1903428	0.0405	0.136	0	0	0	0	Hsp90ab1|1;Ass1|1	2	135	126	53607	http://www.ebi.ac.uk/QuickGO/GTerm?id=GO:1903428	[]
5	5	aromatic compound biosynthetic process	GO:0019438	0.0406	0.136	0	0	0	0	Ywhaq|1;Cbx1|1;H2afz|1;Ep300|1;Spta1|1;H2afj|1;Atp5j|1;Tfam|1;Hmgn2|1;Hnrnpa2b1|1;Idh2|1;Atp5d|1;Taf6|1;Ptges3|1;Lrpprc|1;Atp5h|1;Ndufc2|1;Prdx3|1;Ube2o|1;Ppp3ca|1;Atp5f1|1;Atp5o|1;Iba57|1;Eno1|1;Tceal3|1;H2afy2|1;Pura|1;Atp6v0a1|1;Top1|1;Acat1|1;Basp1|1;Atp5e|1;Hsp90ab1|1;Atp5a1|1;Calr|1	35	11219	126	53607	http://www.ebi.ac.uk/QuickGO/GTerm?id=GO:0019438	[]
5	5	heterocycle biosynthetic process	GO:0018130	0.0408	0.136	0	0	0	0	Ywhaq|1;Cbx1|1;H2afz|1;Ep300|1;Spta1|1;H2afj|1;Atp5j|1;Tfam|1;Hmgn2|1;Hnrnpa2b1|1;Idh2|1;Atp5d|1;Taf6|1;Ptges3|1;Lrpprc|1;Atp5h|1;Ndufc2|1;Prdx3|1;Ube2o|1;Ppp3ca|1;Atp5f1|1;Atp5o|1;Iba57|1;Eno1|1;Tceal3|1;H2afy2|1;Pura|1;Atp6v0a1|1;Top1|1;Acat1|1;Basp1|1;Atp5e|1;Hsp90ab1|1;Atp5a1|1;Calr|1	35	11222	126	53607	http://www.ebi.ac.uk/QuickGO/GTerm?id=GO:0018130	[]
6	4,5,6	negative regulation of cellular metabolic process	GO:0031324	0.0412	0.136	0	0	0	0	Ywhaq|1;Cbx1|1;Pabpc1|1;H2afz|1;Ep300|1;Dbi|1;H2afj|1;Hmgn2|1;Hnrnpa2b1|1;Rock2|1;Lrpprc|1;Ndufc2|1;Prdx3|1;Ppp3ca|1;Ywhae|1;Eno1|1;H2afy2|1;Pura|1;Basp1|1;Hsp90ab1|1;Hspd1|1;Calr|1	22	6368	126	53607	http://www.ebi.ac.uk/QuickGO/GTerm?id=GO:0031324	[]
7	7	nucleotide phosphorylation	GO:0046939	0.0413	0.136	0	0	0	0	Eno1|1;Pdha1|1;Tpi1|1	3	324	126	53607	http://www.ebi.ac.uk/QuickGO/GTerm?id=GO:0046939	[]
4	4	erythrocyte homeostasis	GO:0034101	0.0413	0.136	0	0	0	0	Hbb-b1|1;Hba|1;Hspa9|1	3	324	126	53607	http://www.ebi.ac.uk/QuickGO/GTerm?id=GO:0034101	[]
9	6,8,9	regulation of gamma-aminobutyric acid secretion	GO:0014052	0.0415	0.136	0	0	0	0	Abat|1	1	18	126	53607	http://www.ebi.ac.uk/QuickGO/GTerm?id=GO:0014052	[]
7	7	uterine smooth muscle contraction	GO:0070471	0.0415	0.136	0	0	0	0	Abat|1	1	18	126	53607	http://www.ebi.ac.uk/QuickGO/GTerm?id=GO:0070471	[]
11	7,8,9,10,11	positive regulation of NFAT protein import into nucleus	GO:0051533	0.0415	0.136	0	0	0	0	Ppp3ca|1	1	18	126	53607	http://www.ebi.ac.uk/QuickGO/GTerm?id=GO:0051533	[]
5	5	regulation of sarcomere organization	GO:0060297	0.0415	0.136	0	0	0	0	Ep300|1	1	18	126	53607	http://www.ebi.ac.uk/QuickGO/GTerm?id=GO:0060297	[]
7	5,7	regulation of hyaluronan biosynthetic process	GO:1900125	0.0415	0.136	0	0	0	0	Cltc|1	1	18	126	53607	http://www.ebi.ac.uk/QuickGO/GTerm?id=GO:1900125	[]
8	7,8	negative regulation of transcription from RNA polymerase I promoter	GO:0016479	0.0415	0.136	0	0	0	0	H2afy2|1	1	18	126	53607	http://www.ebi.ac.uk/QuickGO/GTerm?id=GO:0016479	[]
9	6,7,8,9	positive regulation of tumor necrosis factor secretion	GO:1904469	0.0415	0.136	0	0	0	0	Hspd1|1	1	18	126	53607	http://www.ebi.ac.uk/QuickGO/GTerm?id=GO:1904469	[]
5	5	modification of synaptic structure	GO:0099563	0.0415	0.136	0	0	0	0	Cyfip1|1	1	18	126	53607	http://www.ebi.ac.uk/QuickGO/GTerm?id=GO:0099563	[]
6	6	lactate biosynthetic process	GO:0019249	0.0415	0.136	0	0	0	0	Ldha|1	1	18	126	53607	http://www.ebi.ac.uk/QuickGO/GTerm?id=GO:0019249	[]
4	4	cellular ketone body metabolic process	GO:0046950	0.0415	0.136	0	0	0	0	Acat1|1	1	18	126	53607	http://www.ebi.ac.uk/QuickGO/GTerm?id=GO:0046950	[]
7	7	protein localization to cell cortex	GO:0072697	0.0415	0.136	0	0	0	0	Gnai1|1	1	18	126	53607	http://www.ebi.ac.uk/QuickGO/GTerm?id=GO:0072697	[]
8	8	glucosylceramide metabolic process	GO:0006678	0.0415	0.136	0	0	0	0	Aldh5a1|1	1	18	126	53607	http://www.ebi.ac.uk/QuickGO/GTerm?id=GO:0006678	[]
5	5	tetrapyrrole metabolic process	GO:0033013	0.0416	0.137	0	0	0	0	Spta1|1;Iba57|1	2	137	126	53607	http://www.ebi.ac.uk/QuickGO/GTerm?id=GO:0033013	[]
6	5,6	negative regulation of protein complex assembly	GO:0031333	0.0426	0.14	0	0	0	0	Ep300|1;Spta1|1;Sptbn1|1	3	328	126	53607	http://www.ebi.ac.uk/QuickGO/GTerm?id=GO:0031333	[]
5	5	fatty acid derivative biosynthetic process	GO:1901570	0.0427	0.14	0	0	0	0	Ptges3|1;Fam213b|1	2	139	126	53607	http://www.ebi.ac.uk/QuickGO/GTerm?id=GO:1901570	[]
6	6	viral life cycle	GO:0019058	0.0427	0.14	0	0	0	0	Pabpc1|1;Ep300|1;Rock2|1;Hsp90ab1|1	4	556	126	53607	http://www.ebi.ac.uk/QuickGO/GTerm?id=GO:0019058	[]
4	4	muscle system process	GO:0003012	0.0427	0.14	0	0	0	0	Ep300|1;Rock2|1;Ppp3ca|1;Abat|1;Eef2|1;Anxa6|1	6	1080	126	53607	http://www.ebi.ac.uk/QuickGO/GTerm?id=GO:0003012	[]
4	4	negative regulation of nitrogen compound metabolic process	GO:0051172	0.0428	0.14	0	0	0	0	Ywhaq|1;Cbx1|1;Pabpc1|1;H2afz|1;Ep300|1;H2afj|1;Hmgn2|1;Hnrnpa2b1|1;Cltc|1;Lrpprc|1;Ppp3ca|1;Eno1|1;H2afy2|1;Pura|1;Basp1|1;Calr|1	16	4271	126	53607	http://www.ebi.ac.uk/QuickGO/GTerm?id=GO:0051172	[]
6	6	response to calcium ion	GO:0051592	0.0429	0.14	0	0	0	0	Ep300|1;Ppp3ca|1;Anxa5|1	3	329	126	53607	http://www.ebi.ac.uk/QuickGO/GTerm?id=GO:0051592	[]
7	6,7	positive regulation of mitochondrion organization	GO:0010822	0.0432	0.141	0	0	0	0	Anxa5|1;Pdk1|1;Cyb5r1|1;Mdh1|1	4	558	126	53607	http://www.ebi.ac.uk/QuickGO/GTerm?id=GO:0010822	[]
5	5	response to organophosphorus	GO:0046683	0.0433	0.141	0	0	0	0	Ep300|1;Ass1|1;Hspd1|1	3	330	126	53607	http://www.ebi.ac.uk/QuickGO/GTerm?id=GO:0046683	[]
8	8	divalent inorganic cation homeostasis	GO:0072507	0.0433	0.141	0	0	0	0	Dbi|1;Immt|1;Atp2b1|1;Ywhae|1;Anxa6|1;Calb1|1	6	1084	126	53607	http://www.ebi.ac.uk/QuickGO/GTerm?id=GO:0072507	[]
6	6	short-chain fatty acid metabolic process	GO:0046459	0.0437	0.141	0	0	0	0	Aldh5a1|1	1	19	126	53607	http://www.ebi.ac.uk/QuickGO/GTerm?id=GO:0046459	[]
6	6	protein localization to juxtaparanode region of axon	GO:0071205	0.0437	0.141	0	0	0	0	Epb41l3|1	1	19	126	53607	http://www.ebi.ac.uk/QuickGO/GTerm?id=GO:0071205	[]
8	7,8	engulfment of apoptotic cell	GO:0043652	0.0437	0.141	0	0	0	0	Rac1|1	1	19	126	53607	http://www.ebi.ac.uk/QuickGO/GTerm?id=GO:0043652	[]
7	5,7	midgut development	GO:0007494	0.0437	0.141	0	0	0	0	Ass1|1	1	19	126	53607	http://www.ebi.ac.uk/QuickGO/GTerm?id=GO:0007494	[]
7	6,7	sphingoid biosynthetic process	GO:0046520	0.0437	0.141	0	0	0	0	Sptlc3|1	1	19	126	53607	http://www.ebi.ac.uk/QuickGO/GTerm?id=GO:0046520	[]
10	8,10	arginine biosynthetic process	GO:0006526	0.0437	0.141	0	0	0	0	Ass1|1	1	19	126	53607	http://www.ebi.ac.uk/QuickGO/GTerm?id=GO:0006526	[]
4	4	positive regulation of heat generation	GO:0031652	0.0437	0.141	0	0	0	0	Abat|1	1	19	126	53607	http://www.ebi.ac.uk/QuickGO/GTerm?id=GO:0031652	[]
7	7	D-amino acid transport	GO:0042940	0.0437	0.141	0	0	0	0	Slc1a2|1	1	19	126	53607	http://www.ebi.ac.uk/QuickGO/GTerm?id=GO:0042940	[]
7	7	cerebral cortex GABAergic interneuron development	GO:0021894	0.0437	0.141	0	0	0	0	Rac1|1	1	19	126	53607	http://www.ebi.ac.uk/QuickGO/GTerm?id=GO:0021894	[]
6	5,6	neuron development	GO:0048666	0.044	0.141	0	0	0	0	Ep300|1;Negr1|1;Cyfip1|1;Rock2|1;Gnao1|1;Ppp3ca|1;Syn1|1;Cnp|1;Hsp90ab1|1;Rac1|1;Sh3gl2|1;Epb41l3|1	12	2936	126	53607	http://www.ebi.ac.uk/QuickGO/GTerm?id=GO:0048666	[]
7	7	protein localization to mitochondrion	GO:0070585	0.0442	0.142	0	0	0	0	Ywhaz|1;Cyb5r1|1;Hspd1|1	3	333	126	53607	http://www.ebi.ac.uk/QuickGO/GTerm?id=GO:0070585	[]
8	7,8	cellular cation homeostasis	GO:0030003	0.0443	0.142	0	0	0	0	Dbi|1;Immt|1;Atp2b1|1;Ywhae|1;Atp6v0a1|1;Anxa6|1;Calb1|1	7	1376	126	53607	http://www.ebi.ac.uk/QuickGO/GTerm?id=GO:0030003	[]
4	4	cellular component disassembly	GO:0022411	0.0446	0.143	0	0	0	0	Spta1|1;Sptbn1|1;Anxa5|1;Pdk1|1;Sh3gl2|1;Mdh1|1	6	1092	126	53607	http://www.ebi.ac.uk/QuickGO/GTerm?id=GO:0022411	[]
6	5,6	regulation of nitric oxide biosynthetic process	GO:0045428	0.0455	0.145	0	0	0	0	Hsp90ab1|1;Ass1|1	2	144	126	53607	http://www.ebi.ac.uk/QuickGO/GTerm?id=GO:0045428	[]
5	5	regulation of cardiac muscle hypertrophy	GO:0010611	0.0455	0.145	0	0	0	0	Rock2|1;Ppp3ca|1	2	144	126	53607	http://www.ebi.ac.uk/QuickGO/GTerm?id=GO:0010611	[]
8	7,8	actin polymerization or depolymerization	GO:0008154	0.0458	0.146	0	0	0	0	Spta1|1;Cyfip1|1;Sptbn1|1;Rac1|1	4	569	126	53607	http://www.ebi.ac.uk/QuickGO/GTerm?id=GO:0008154	[]
4	4	RNA localization	GO:0006403	0.0459	0.146	0	0	0	0	Hnrnpa1|1;Hnrnpa2b1|1;Lrpprc|1	3	338	126	53607	http://www.ebi.ac.uk/QuickGO/GTerm?id=GO:0006403	[]
6	6	glycerol-3-phosphate metabolic process	GO:0006072	0.046	0.146	0	0	0	0	Gpd2|1	1	20	126	53607	http://www.ebi.ac.uk/QuickGO/GTerm?id=GO:0006072	[]
11	6,8,11	olfactory bulb interneuron development	GO:0021891	0.046	0.146	0	0	0	0	Rac1|1	1	20	126	53607	http://www.ebi.ac.uk/QuickGO/GTerm?id=GO:0021891	[]
5	5	fatty acid derivative catabolic process	GO:1901569	0.046	0.146	0	0	0	0	Acat1|1	1	20	126	53607	http://www.ebi.ac.uk/QuickGO/GTerm?id=GO:1901569	[]
7	5,7	virion attachment to host cell	GO:0019062	0.046	0.146	0	0	0	0	Hsp90ab1|1	1	20	126	53607	http://www.ebi.ac.uk/QuickGO/GTerm?id=GO:0019062	[]
8	8	galactosylceramide metabolic process	GO:0006681	0.046	0.146	0	0	0	0	Aldh5a1|1	1	20	126	53607	http://www.ebi.ac.uk/QuickGO/GTerm?id=GO:0006681	[]
5	5	mast cell chemotaxis	GO:0002551	0.046	0.146	0	0	0	0	Rac1|1	1	20	126	53607	http://www.ebi.ac.uk/QuickGO/GTerm?id=GO:0002551	[]
7	5,7	urea cycle	GO:0000050	0.046	0.146	0	0	0	0	Ass1|1	1	20	126	53607	http://www.ebi.ac.uk/QuickGO/GTerm?id=GO:0000050	[]
11	6,7,8,10,11	negative regulation of gene silencing by miRNA	GO:0060965	0.046	0.146	0	0	0	0	Ppp3ca|1	1	20	126	53607	http://www.ebi.ac.uk/QuickGO/GTerm?id=GO:0060965	[]
6	5,6	skin development	GO:0043588	0.0465	0.147	0	0	0	0	Dbi|1;Rock2|1;Ptges3|1;H2afy2|1	4	572	126	53607	http://www.ebi.ac.uk/QuickGO/GTerm?id=GO:0043588	[]
6	6	alcohol catabolic process	GO:0046164	0.0466	0.147	0	0	0	0	Gpd2|1;Tpi1|1	2	146	126	53607	http://www.ebi.ac.uk/QuickGO/GTerm?id=GO:0046164	[]
7	7	DNA geometric change	GO:0032392	0.0466	0.147	0	0	0	0	Hnrnpa2b1|1;Pura|1	2	146	126	53607	http://www.ebi.ac.uk/QuickGO/GTerm?id=GO:0032392	[]
8	8	protein depolymerization	GO:0051261	0.0469	0.148	0	0	0	0	Spta1|1;Sptbn1|1;Sh3gl2|1	3	341	126	53607	http://www.ebi.ac.uk/QuickGO/GTerm?id=GO:0051261	[]
4	4	regulation of microtubule-based process	GO:0032886	0.047	0.148	0	0	0	0	Cltc|1;Rock2|1;Gnai1|1;Rac1|1	4	574	126	53607	http://www.ebi.ac.uk/QuickGO/GTerm?id=GO:0032886	[]
3	3	response to abiotic stimulus	GO:0009628	0.0472	0.149	0	0	0	0	Ep300|1;Cyfip1|1;Abat|1;Atp2b1|1;Pdk1|1;Ywhae|1;Hsp90ab1|1;Slc1a2|1;Rac1|1;Hspd1|1;Slc12a2|1	11	2642	126	53607	http://www.ebi.ac.uk/QuickGO/GTerm?id=GO:0009628	[]
6	6	regulation of muscle hypertrophy	GO:0014743	0.0477	0.149	0	0	0	0	Rock2|1;Ppp3ca|1	2	148	126	53607	http://www.ebi.ac.uk/QuickGO/GTerm?id=GO:0014743	[]
6	6	polysaccharide biosynthetic process	GO:0000271	0.0477	0.149	0	0	0	0	Cltc|1;Ptges3|1	2	148	126	53607	http://www.ebi.ac.uk/QuickGO/GTerm?id=GO:0000271	[]
5	5	negative regulation of hematopoietic progenitor cell differentiation	GO:1901533	0.0482	0.149	0	0	0	0	Hspa9|1	1	21	126	53607	http://www.ebi.ac.uk/QuickGO/GTerm?id=GO:1901533	[]
7	7	clathrin coat disassembly	GO:0072318	0.0482	0.149	0	0	0	0	Sh3gl2|1	1	21	126	53607	http://www.ebi.ac.uk/QuickGO/GTerm?id=GO:0072318	[]
5	5	metanephric collecting duct development	GO:0072205	0.0482	0.149	0	0	0	0	Calb1|1	1	21	126	53607	http://www.ebi.ac.uk/QuickGO/GTerm?id=GO:0072205	[]
8	6,7,8	regulation of miRNA metabolic process	GO:2000628	0.0482	0.149	0	0	0	0	Ep300|1	1	21	126	53607	http://www.ebi.ac.uk/QuickGO/GTerm?id=GO:2000628	[]
9	7,8,9	negative regulation of mRNA catabolic process	GO:1902373	0.0482	0.149	0	0	0	0	Pabpc1|1	1	21	126	53607	http://www.ebi.ac.uk/QuickGO/GTerm?id=GO:1902373	[]
5	4,5	hypoxia-inducible factor-1alpha signaling pathway	GO:0097411	0.0482	0.149	0	0	0	0	Pdk1|1	1	21	126	53607	http://www.ebi.ac.uk/QuickGO/GTerm?id=GO:0097411	[]
10	5,8,10	midbrain dopaminergic neuron differentiation	GO:1904948	0.0482	0.149	0	0	0	0	Rac1|1	1	21	126	53607	http://www.ebi.ac.uk/QuickGO/GTerm?id=GO:1904948	[]
9	9	tubulin deacetylation	GO:0090042	0.0482	0.149	0	0	0	0	Ep300|1	1	21	126	53607	http://www.ebi.ac.uk/QuickGO/GTerm?id=GO:0090042	[]
6	4,6	adhesion of symbiont to host cell	GO:0044650	0.0482	0.149	0	0	0	0	Hsp90ab1|1	1	21	126	53607	http://www.ebi.ac.uk/QuickGO/GTerm?id=GO:0044650	[]
7	4,5,6,7	regulation of trophoblast cell migration	GO:1901163	0.0482	0.149	0	0	0	0	Calr|1	1	21	126	53607	http://www.ebi.ac.uk/QuickGO/GTerm?id=GO:1901163	[]
10	10	L-glutamate(1-) import into cell	GO:1903802	0.0482	0.149	0	0	0	0	Slc1a2|1	1	21	126	53607	http://www.ebi.ac.uk/QuickGO/GTerm?id=GO:1903802	[]
7	7	L-glutamate import into cell	GO:1990123	0.0482	0.149	0	0	0	0	Slc1a2|1	1	21	126	53607	http://www.ebi.ac.uk/QuickGO/GTerm?id=GO:1990123	[]
6	4,6	regulation of cell shape	GO:0008360	0.0482	0.149	0	0	0	0	Spta1|1;Cyfip1|1;Epb41l3|1	3	345	126	53607	http://www.ebi.ac.uk/QuickGO/GTerm?id=GO:0008360	[]
6	5,6	regulation of cell cycle arrest	GO:0071156	0.0483	0.149	0	0	0	0	Hsp90ab1|1;Calr|1	2	149	126	53607	http://www.ebi.ac.uk/QuickGO/GTerm?id=GO:0071156	[]
10	7,9,10	regulation of actin filament depolymerization	GO:0030834	0.0483	0.149	0	0	0	0	Spta1|1;Sptbn1|1	2	149	126	53607	http://www.ebi.ac.uk/QuickGO/GTerm?id=GO:0030834	[]
7	6,7	cellular ion homeostasis	GO:0006873	0.0485	0.15	0	0	0	0	Dbi|1;Immt|1;Atp2b1|1;Ywhae|1;Atp6v0a1|1;Anxa6|1;Calb1|1	7	1405	126	53607	http://www.ebi.ac.uk/QuickGO/GTerm?id=GO:0006873	[]
8	5,7,8	regulation of endothelial cell migration	GO:0010594	0.0486	0.15	0	0	0	0	Rock2|1;Atp5a1|1;Calr|1	3	346	126	53607	http://www.ebi.ac.uk/QuickGO/GTerm?id=GO:0010594	[]
7	7	regulation of phosphoprotein phosphatase activity	GO:0043666	0.0495	0.152	0	0	0	0	Rock2|1;Hsp90ab1|1	2	151	126	53607	http://www.ebi.ac.uk/QuickGO/GTerm?id=GO:0043666	[]
4	4	symbiosis, encompassing mutualism through parasitism	GO:0044403	0.05	0.153	0	0	0	0	Pabpc1|1;Ep300|1;Rock2|1;Hsp90ab1|1;Hspd1|1	5	846	126	53607	http://www.ebi.ac.uk/QuickGO/GTerm?id=GO:0044403	[]
10	5,6,7,9,10	negative regulation of gene silencing by RNA	GO:0060967	0.0505	0.153	0	0	0	0	Ppp3ca|1	1	22	126	53607	http://www.ebi.ac.uk/QuickGO/GTerm?id=GO:0060967	[]
6	4,6	muscle atrophy	GO:0014889	0.0505	0.153	0	0	0	0	Ep300|1	1	22	126	53607	http://www.ebi.ac.uk/QuickGO/GTerm?id=GO:0014889	[]
10	7,8,10	regulation of neuron maturation	GO:0014041	0.0505	0.153	0	0	0	0	Rac1|1	1	22	126	53607	http://www.ebi.ac.uk/QuickGO/GTerm?id=GO:0014041	[]
9	5,6,8,9	negative regulation of posttranscriptional gene silencing	GO:0060149	0.0505	0.153	0	0	0	0	Ppp3ca|1	1	22	126	53607	http://www.ebi.ac.uk/QuickGO/GTerm?id=GO:0060149	[]
5	5	fructose 6-phosphate metabolic process	GO:0006002	0.0505	0.153	0	0	0	0	Taldo1|1	1	22	126	53607	http://www.ebi.ac.uk/QuickGO/GTerm?id=GO:0006002	[]
6	4,5,6	trophoblast cell migration	GO:0061450	0.0505	0.153	0	0	0	0	Calr|1	1	22	126	53607	http://www.ebi.ac.uk/QuickGO/GTerm?id=GO:0061450	[]
6	6	short-term memory	GO:0007614	0.0505	0.153	0	0	0	0	Calb1|1	1	22	126	53607	http://www.ebi.ac.uk/QuickGO/GTerm?id=GO:0007614	[]
7	7	galactolipid metabolic process	GO:0019374	0.0505	0.153	0	0	0	0	Aldh5a1|1	1	22	126	53607	http://www.ebi.ac.uk/QuickGO/GTerm?id=GO:0019374	[]
4	4	ketone body metabolic process	GO:1902224	0.0505	0.153	0	0	0	0	Acat1|1	1	22	126	53607	http://www.ebi.ac.uk/QuickGO/GTerm?id=GO:1902224	[]
5	5	spermine metabolic process	GO:0008215	0.0505	0.153	0	0	0	0	Sat2|1	1	22	126	53607	http://www.ebi.ac.uk/QuickGO/GTerm?id=GO:0008215	[]
5	4,5	urea metabolic process	GO:0019627	0.0505	0.153	0	0	0	0	Ass1|1	1	22	126	53607	http://www.ebi.ac.uk/QuickGO/GTerm?id=GO:0019627	[]
5	5	positive regulation of viral life cycle	GO:1903902	0.0506	0.154	0	0	0	0	Pabpc1|1;Ep300|1	2	153	126	53607	http://www.ebi.ac.uk/QuickGO/GTerm?id=GO:1903902	[]
6	6	amino acid transport	GO:0006865	0.0507	0.154	0	0	0	0	Abat|1;Slc1a2|1;Slc32a1|1	3	352	126	53607	http://www.ebi.ac.uk/QuickGO/GTerm?id=GO:0006865	[]
6	6	phosphorylation	GO:0016310	0.0507	0.154	0	0	0	0	Ep300|1;Hbb-b1|1;Rock2|1;Ptges3|1;Ndufc2|1;Sdha|1;Prdx3|1;Sptbn1|1;Uqcrb|1;Pdk1|1;Ywhae|1;Eno1|1;Dld|1;Uqcr10|1;Top1|1;Hsp90ab1|1;Rac1|1;Hspa9|1;Pdha1|1;Tpi1|1	20	5788	126	53607	http://www.ebi.ac.uk/QuickGO/GTerm?id=GO:0016310	[]
6	6	response to insulin	GO:0032868	0.0508	0.154	0	0	0	0	H2afz|1;Ywhag|1;Cyfip1|1;Got2|1	4	589	126	53607	http://www.ebi.ac.uk/QuickGO/GTerm?id=GO:0032868	[]
7	6,7	regulation of mitophagy	GO:1903146	0.051	0.154	0	0	0	0	Anxa5|1;Pdk1|1;Mdh1|1	3	353	126	53607	http://www.ebi.ac.uk/QuickGO/GTerm?id=GO:1903146	[]
6	5,6	glutathione metabolic process	GO:0006749	0.0512	0.155	0	0	0	0	Aldh5a1|1;Oplah|1	2	154	126	53607	http://www.ebi.ac.uk/QuickGO/GTerm?id=GO:0006749	[]
6	5,6	kidney epithelium development	GO:0072073	0.0514	0.155	0	0	0	0	Acat1|1;Basp1|1;Calb1|1	3	354	126	53607	http://www.ebi.ac.uk/QuickGO/GTerm?id=GO:0072073	[]
4	4	regulation of synapse structure or activity	GO:0050803	0.0516	0.156	0	0	0	0	Dbi|1;Ywhag|1;Syn1|1;Calb1|1	4	592	126	53607	http://www.ebi.ac.uk/QuickGO/GTerm?id=GO:0050803	[]
8	7,8	monocarboxylic acid transport	GO:0015718	0.0524	0.156	0	0	0	0	Got2|1;Abat|1;Slc32a1|1	3	357	126	53607	http://www.ebi.ac.uk/QuickGO/GTerm?id=GO:0015718	[]
4	4	regulation of epidermis development	GO:0045682	0.0524	0.156	0	0	0	0	Rock2|1;H2afy2|1	2	156	126	53607	http://www.ebi.ac.uk/QuickGO/GTerm?id=GO:0045682	[]
7	5,6,7	positive regulation of centrosome duplication	GO:0010825	0.0527	0.156	0	0	0	0	Rock2|1	1	23	126	53607	http://www.ebi.ac.uk/QuickGO/GTerm?id=GO:0010825	[]
5	5	protein localization to axon	GO:0099612	0.0527	0.156	0	0	0	0	Epb41l3|1	1	23	126	53607	http://www.ebi.ac.uk/QuickGO/GTerm?id=GO:0099612	[]
5	5	regulation of sperm motility	GO:1901317	0.0527	0.156	0	0	0	0	Anxa5|1	1	23	126	53607	http://www.ebi.ac.uk/QuickGO/GTerm?id=GO:1901317	[]
6	6	positive regulation of mitochondrial membrane potential	GO:0010918	0.0527	0.156	0	0	0	0	Ndufc2|1	1	23	126	53607	http://www.ebi.ac.uk/QuickGO/GTerm?id=GO:0010918	[]
5	5	mammary duct terminal end bud growth	GO:0060763	0.0527	0.156	0	0	0	0	Slc12a2|1	1	23	126	53607	http://www.ebi.ac.uk/QuickGO/GTerm?id=GO:0060763	[]
7	7	cellular response to forskolin	GO:1904322	0.0527	0.156	0	0	0	0	Gnai1|1	1	23	126	53607	http://www.ebi.ac.uk/QuickGO/GTerm?id=GO:1904322	[]
8	7,8	common-partner SMAD protein phosphorylation	GO:0007182	0.0527	0.156	0	0	0	0	Sptbn1|1	1	23	126	53607	http://www.ebi.ac.uk/QuickGO/GTerm?id=GO:0007182	[]
6	5,6	kynurenine metabolic process	GO:0070189	0.0527	0.156	0	0	0	0	Got2|1	1	23	126	53607	http://www.ebi.ac.uk/QuickGO/GTerm?id=GO:0070189	[]
9	8,9	regulation of transcription of nuclear large rRNA transcript from RNA polymerase I promoter	GO:1901836	0.0527	0.156	0	0	0	0	H2afy2|1	1	23	126	53607	http://www.ebi.ac.uk/QuickGO/GTerm?id=GO:1901836	[]
7	7	cellular response to testosterone stimulus	GO:0071394	0.0527	0.156	0	0	0	0	Rock2|1	1	23	126	53607	http://www.ebi.ac.uk/QuickGO/GTerm?id=GO:0071394	[]
6	6	response to forskolin	GO:1904321	0.0527	0.156	0	0	0	0	Gnai1|1	1	23	126	53607	http://www.ebi.ac.uk/QuickGO/GTerm?id=GO:1904321	[]
13	9,10,13	histone H4-K12 acetylation	GO:0043983	0.0527	0.156	0	0	0	0	Jade3|1	1	23	126	53607	http://www.ebi.ac.uk/QuickGO/GTerm?id=GO:0043983	[]
5	5	establishment of Golgi localization	GO:0051683	0.0527	0.156	0	0	0	0	Ywhaz|1	1	23	126	53607	http://www.ebi.ac.uk/QuickGO/GTerm?id=GO:0051683	[]
6	6	negative regulation of chromatin binding	GO:0035562	0.0527	0.156	0	0	0	0	Ppp3ca|1	1	23	126	53607	http://www.ebi.ac.uk/QuickGO/GTerm?id=GO:0035562	[]
8	4,7,8	regulation of heat generation	GO:0031650	0.0527	0.156	0	0	0	0	Abat|1	1	23	126	53607	http://www.ebi.ac.uk/QuickGO/GTerm?id=GO:0031650	[]
6	5,6	tangential migration from the subventricular zone to the olfactory bulb	GO:0022028	0.0527	0.156	0	0	0	0	Rac1|1	1	23	126	53607	http://www.ebi.ac.uk/QuickGO/GTerm?id=GO:0022028	[]
8	6,7,8	cellular glucose homeostasis	GO:0001678	0.0531	0.157	0	0	0	0	Ep300|1;Ppp3ca|1;Vsnl1|1	3	359	126	53607	http://www.ebi.ac.uk/QuickGO/GTerm?id=GO:0001678	[]
6	6	neuron apoptotic process	GO:0051402	0.0534	0.158	0	0	0	0	Dnajc5|1;Prdx3|1;Hsp90ab1|1;Hspd1|1	4	599	126	53607	http://www.ebi.ac.uk/QuickGO/GTerm?id=GO:0051402	[]
4	4	positive regulation of synaptic transmission	GO:0050806	0.0535	0.158	0	0	0	0	Dbi|1;Abat|1;Calb1|1	3	360	126	53607	http://www.ebi.ac.uk/QuickGO/GTerm?id=GO:0050806	[]
6	6	lamellipodium assembly	GO:0030032	0.0536	0.158	0	0	0	0	Cyfip1|1;Rac1|1	2	158	126	53607	http://www.ebi.ac.uk/QuickGO/GTerm?id=GO:0030032	[]
8	8	divalent metal ion transport	GO:0070838	0.0538	0.158	0	0	0	0	Dbi|1;Gnao1|1;Ppp3ca|1;Atp2b1|1;Ywhae|1;Anxa6|1	6	1145	126	53607	http://www.ebi.ac.uk/QuickGO/GTerm?id=GO:0070838	[]
8	7,8	regulation of protein dephosphorylation	GO:0035304	0.0538	0.158	0	0	0	0	Rock2|1;Ywhae|1;Hsp90ab1|1	3	361	126	53607	http://www.ebi.ac.uk/QuickGO/GTerm?id=GO:0035304	[]
4	4	regulation of binding	GO:0051098	0.054	0.159	0	0	0	0	Ep300|1;Spta1|1;Ppp3ca|1;Eno1|1;Hsp90ab1|1	5	865	126	53607	http://www.ebi.ac.uk/QuickGO/GTerm?id=GO:0051098	[]
5	5	response to fatty acid	GO:0070542	0.0542	0.159	0	0	0	0	Ep300|1;Ass1|1	2	159	126	53607	http://www.ebi.ac.uk/QuickGO/GTerm?id=GO:0070542	[]
7	7	divalent inorganic cation transport	GO:0072511	0.0544	0.159	0	0	0	0	Dbi|1;Gnao1|1;Ppp3ca|1;Atp2b1|1;Ywhae|1;Anxa6|1	6	1148	126	53607	http://www.ebi.ac.uk/QuickGO/GTerm?id=GO:0072511	[]
7	6,7	establishment of synaptic vesicle localization	GO:0097480	0.0546	0.159	0	0	0	0	Cyfip1|1;Sh3gl2|1;Amph|1	3	363	126	53607	http://www.ebi.ac.uk/QuickGO/GTerm?id=GO:0097480	[]
7	6,7	synaptic vesicle transport	GO:0048489	0.0546	0.159	0	0	0	0	Cyfip1|1;Sh3gl2|1;Amph|1	3	363	126	53607	http://www.ebi.ac.uk/QuickGO/GTerm?id=GO:0048489	[]
5	5	regulation of cellular catabolic process	GO:0031329	0.0547	0.159	0	0	0	0	Pabpc1|1;Dbi|1;Lrpprc|1;Anxa5|1;Pdk1|1;Atp6v0a1|1;Hsp90ab1|1;Mdh1|1	8	1749	126	53607	http://www.ebi.ac.uk/QuickGO/GTerm?id=GO:0031329	[]
9	6,7,8,9	negative regulation of platelet aggregation	GO:0090331	0.0549	0.159	0	0	0	0	Abat|1	1	24	126	53607	http://www.ebi.ac.uk/QuickGO/GTerm?id=GO:0090331	[]
4	4	nitrogen cycle metabolic process	GO:0071941	0.0549	0.159	0	0	0	0	Ass1|1	1	24	126	53607	http://www.ebi.ac.uk/QuickGO/GTerm?id=GO:0071941	[]
6	6	regulation of angiotensin metabolic process	GO:0060177	0.0549	0.159	0	0	0	0	Ep300|1	1	24	126	53607	http://www.ebi.ac.uk/QuickGO/GTerm?id=GO:0060177	[]
6	6	response to folic acid	GO:0051593	0.0549	0.159	0	0	0	0	Eef2|1	1	24	126	53607	http://www.ebi.ac.uk/QuickGO/GTerm?id=GO:0051593	[]
10	5,6,7,8,9,10	regulation of Golgi to plasma membrane protein transport	GO:0042996	0.0549	0.159	0	0	0	0	Lypla1|1	1	24	126	53607	http://www.ebi.ac.uk/QuickGO/GTerm?id=GO:0042996	[]
7	6,7	regulation of interleukin-2 secretion	GO:1900040	0.0549	0.159	0	0	0	0	Sptbn1|1	1	24	126	53607	http://www.ebi.ac.uk/QuickGO/GTerm?id=GO:1900040	[]
10	9,10	vacuolar proton-transporting V-type ATPase complex assembly	GO:0070072	0.0549	0.159	0	0	0	0	Atp6v0a1|1	1	24	126	53607	http://www.ebi.ac.uk/QuickGO/GTerm?id=GO:0070072	[]
8	7,8	hepatocyte growth factor receptor signaling pathway	GO:0048012	0.0549	0.159	0	0	0	0	Rac1|1	1	24	126	53607	http://www.ebi.ac.uk/QuickGO/GTerm?id=GO:0048012	[]
5	5	aldehyde biosynthetic process	GO:0046184	0.0549	0.159	0	0	0	0	Tpi1|1	1	24	126	53607	http://www.ebi.ac.uk/QuickGO/GTerm?id=GO:0046184	[]
7	6,7	regulation of hematopoietic stem cell differentiation	GO:1902036	0.0549	0.159	0	0	0	0	Hspa9|1	1	24	126	53607	http://www.ebi.ac.uk/QuickGO/GTerm?id=GO:1902036	[]
8	8	peptidyl-serine dephosphorylation	GO:0070262	0.0549	0.159	0	0	0	0	Ywhae|1	1	24	126	53607	http://www.ebi.ac.uk/QuickGO/GTerm?id=GO:0070262	[]
7	6,7	histamine secretion	GO:0001821	0.0549	0.159	0	0	0	0	Ywhaz|1	1	24	126	53607	http://www.ebi.ac.uk/QuickGO/GTerm?id=GO:0001821	[]
5	5	progesterone metabolic process	GO:0042448	0.0549	0.159	0	0	0	0	Afp|1	1	24	126	53607	http://www.ebi.ac.uk/QuickGO/GTerm?id=GO:0042448	[]
6	6	response to purine-containing compound	GO:0014074	0.0553	0.159	0	0	0	0	Ep300|1;Ass1|1;Hspd1|1	3	365	126	53607	http://www.ebi.ac.uk/QuickGO/GTerm?id=GO:0014074	[]
5	5	chromosome organization	GO:0051276	0.0553	0.159	0	0	0	0	H2afz|1;Ep300|1;H2afj|1;Tfam|1;Hnrnpa2b1|1;H3f3c|1;Jade3|1;Ptges3|1;H2afy2|1;Pura|1;Top1|1;Hsp90ab1|1	12	3047	126	53607	http://www.ebi.ac.uk/QuickGO/GTerm?id=GO:0051276	[]
7	6,7	cellular response to dsRNA	GO:0071359	0.0554	0.16	0	0	0	0	Hnrnpa2b1|1;Ppp3ca|1	2	161	126	53607	http://www.ebi.ac.uk/QuickGO/GTerm?id=GO:0071359	[]
8	6,7,8	protein targeting to nucleus	GO:0044744	0.0555	0.16	0	0	0	0	Ep300|1;Sptbn1|1;Ppp3ca|1;Hsp90ab1|1	4	607	126	53607	http://www.ebi.ac.uk/QuickGO/GTerm?id=GO:0044744	[]
8	6,7,8	protein import into nucleus	GO:0006606	0.0558	0.16	0	0	0	0	Ep300|1;Sptbn1|1;Ppp3ca|1;Hsp90ab1|1	4	608	126	53607	http://www.ebi.ac.uk/QuickGO/GTerm?id=GO:0006606	[]
3	3	interspecies interaction between organisms	GO:0044419	0.0566	0.163	0	0	0	0	Pabpc1|1;Ep300|1;Rock2|1;Hsp90ab1|1;Hspd1|1	5	877	126	53607	http://www.ebi.ac.uk/QuickGO/GTerm?id=GO:0044419	[]
6	6	regulation of glial cell migration	GO:1903975	0.0571	0.163	0	0	0	0	Idh2|1	1	25	126	53607	http://www.ebi.ac.uk/QuickGO/GTerm?id=GO:1903975	[]
5	5	response to laminar fluid shear stress	GO:0034616	0.0571	0.163	0	0	0	0	Ass1|1	1	25	126	53607	http://www.ebi.ac.uk/QuickGO/GTerm?id=GO:0034616	[]
9	8,9	proton-transporting V-type ATPase complex assembly	GO:0070070	0.0571	0.163	0	0	0	0	Atp6v0a1|1	1	25	126	53607	http://www.ebi.ac.uk/QuickGO/GTerm?id=GO:0070070	[]
6	4,5,6	negative regulation of erythrocyte differentiation	GO:0045647	0.0571	0.163	0	0	0	0	Hspa9|1	1	25	126	53607	http://www.ebi.ac.uk/QuickGO/GTerm?id=GO:0045647	[]
12	8,9,11,12	primary miRNA processing	GO:0031053	0.0571	0.163	0	0	0	0	Hnrnpa2b1|1	1	25	126	53607	http://www.ebi.ac.uk/QuickGO/GTerm?id=GO:0031053	[]
9	5,7,8,9	negative regulation of amino acid transport	GO:0051956	0.0571	0.163	0	0	0	0	Abat|1	1	25	126	53607	http://www.ebi.ac.uk/QuickGO/GTerm?id=GO:0051956	[]
9	9	L-glutamate import	GO:0051938	0.0571	0.163	0	0	0	0	Slc1a2|1	1	25	126	53607	http://www.ebi.ac.uk/QuickGO/GTerm?id=GO:0051938	[]
5	5	mast cell migration	GO:0097531	0.0571	0.163	0	0	0	0	Rac1|1	1	25	126	53607	http://www.ebi.ac.uk/QuickGO/GTerm?id=GO:0097531	[]
8	8	gluconeogenesis	GO:0006094	0.0573	0.163	0	0	0	0	Gpd2|1;Tpi1|1	2	164	126	53607	http://www.ebi.ac.uk/QuickGO/GTerm?id=GO:0006094	[]
9	8,9	actin filament depolymerization	GO:0030042	0.0579	0.165	0	0	0	0	Spta1|1;Sptbn1|1	2	165	126	53607	http://www.ebi.ac.uk/QuickGO/GTerm?id=GO:0030042	[]
5	5	regulation of dendrite development	GO:0050773	0.0582	0.165	0	0	0	0	Cyfip1|1;Ppp3ca|1;Rac1|1	3	373	126	53607	http://www.ebi.ac.uk/QuickGO/GTerm?id=GO:0050773	[]
7	7	positive regulation of macroautophagy	GO:0016239	0.0586	0.166	0	0	0	0	Anxa5|1;Pdk1|1;Mdh1|1	3	374	126	53607	http://www.ebi.ac.uk/QuickGO/GTerm?id=GO:0016239	[]
5	5	anatomical structure homeostasis	GO:0060249	0.0591	0.166	0	0	0	0	Hnrnpa2b1|1;Ptges3|1;Hsp90ab1|1;Rac1|1;Calb1|1	5	888	126	53607	http://www.ebi.ac.uk/QuickGO/GTerm?id=GO:0060249	[]
10	7,8,9,10	negative regulation of actin filament polymerization	GO:0030837	0.0591	0.166	0	0	0	0	Spta1|1;Sptbn1|1	2	167	126	53607	http://www.ebi.ac.uk/QuickGO/GTerm?id=GO:0030837	[]
5	4,5	negative regulation of synaptic transmission	GO:0050805	0.0591	0.166	0	0	0	0	Cyfip1|1;Gnai1|1	2	167	126	53607	http://www.ebi.ac.uk/QuickGO/GTerm?id=GO:0050805	[]
5	5	nitric oxide biosynthetic process	GO:0006809	0.0591	0.166	0	0	0	0	Hsp90ab1|1;Ass1|1	2	167	126	53607	http://www.ebi.ac.uk/QuickGO/GTerm?id=GO:0006809	[]
7	6,7	amino acid import across plasma membrane	GO:0089718	0.0594	0.166	0	0	0	0	Slc1a2|1	1	26	126	53607	http://www.ebi.ac.uk/QuickGO/GTerm?id=GO:0089718	[]
9	8,9	DNA unwinding involved in DNA replication	GO:0006268	0.0594	0.166	0	0	0	0	Pura|1	1	26	126	53607	http://www.ebi.ac.uk/QuickGO/GTerm?id=GO:0006268	[]
7	7	aspartate family amino acid catabolic process	GO:0009068	0.0594	0.166	0	0	0	0	Got2|1	1	26	126	53607	http://www.ebi.ac.uk/QuickGO/GTerm?id=GO:0009068	[]
5	4,5	regulation of respiratory burst	GO:0060263	0.0594	0.166	0	0	0	0	Rac1|1	1	26	126	53607	http://www.ebi.ac.uk/QuickGO/GTerm?id=GO:0060263	[]
7	5,7	negative regulation of catecholamine secretion	GO:0033604	0.0594	0.166	0	0	0	0	Abat|1	1	26	126	53607	http://www.ebi.ac.uk/QuickGO/GTerm?id=GO:0033604	[]
6	6	interleukin-2 secretion	GO:0070970	0.0594	0.166	0	0	0	0	Sptbn1|1	1	26	126	53607	http://www.ebi.ac.uk/QuickGO/GTerm?id=GO:0070970	[]
6	6	response to glucagon	GO:0033762	0.0594	0.166	0	0	0	0	Ass1|1	1	26	126	53607	http://www.ebi.ac.uk/QuickGO/GTerm?id=GO:0033762	[]
5	5	dendritic cell chemotaxis	GO:0002407	0.0594	0.166	0	0	0	0	Calr|1	1	26	126	53607	http://www.ebi.ac.uk/QuickGO/GTerm?id=GO:0002407	[]
5	5	cellular response to arsenic-containing substance	GO:0071243	0.0594	0.166	0	0	0	0	Hnrnpa1|1	1	26	126	53607	http://www.ebi.ac.uk/QuickGO/GTerm?id=GO:0071243	[]
8	7,8	glycine transport	GO:0015816	0.0594	0.166	0	0	0	0	Slc32a1|1	1	26	126	53607	http://www.ebi.ac.uk/QuickGO/GTerm?id=GO:0015816	[]
3	3	negative regulation of metabolic process	GO:0009892	0.0598	0.167	0	0	0	0	Ywhaq|1;Cbx1|1;Pabpc1|1;H2afz|1;Ep300|1;Dbi|1;H2afj|1;Hmgn2|1;Hnrnpa2b1|1;Cltc|1;Rock2|1;Lrpprc|1;Ndufc2|1;Prdx3|1;Ppp3ca|1;Ywhae|1;Eno1|1;H2afy2|1;Pura|1;Basp1|1;Hsp90ab1|1;Hspd1|1;Calr|1	23	7004	126	53607	http://www.ebi.ac.uk/QuickGO/GTerm?id=GO:0009892	[]
5	4,5	regulation of tissue remodeling	GO:0034103	0.0604	0.169	0	0	0	0	Rock2|1;Ppp3ca|1	2	169	126	53607	http://www.ebi.ac.uk/QuickGO/GTerm?id=GO:0034103	[]
7	5,7	negative regulation of wound healing	GO:0061045	0.0604	0.169	0	0	0	0	Abat|1;Anxa5|1	2	169	126	53607	http://www.ebi.ac.uk/QuickGO/GTerm?id=GO:0061045	[]
5	5	regulation of cell morphogenesis	GO:0022604	0.0606	0.169	0	0	0	0	Ep300|1;Spta1|1;Cyfip1|1;Ppp3ca|1;Rac1|1;Epb41l3|1;Calr|1	7	1479	126	53607	http://www.ebi.ac.uk/QuickGO/GTerm?id=GO:0022604	[]
5	5	cellular response to organonitrogen compound	GO:0071417	0.0607	0.169	0	0	0	0	H2afz|1;Ep300|1;Ywhag|1;Cyfip1|1;Anxa5|1;Ass1|1	6	1181	126	53607	http://www.ebi.ac.uk/QuickGO/GTerm?id=GO:0071417	[]
5	5	organic hydroxy compound catabolic process	GO:1901616	0.061	0.17	0	0	0	0	Gpd2|1;Tpi1|1	2	170	126	53607	http://www.ebi.ac.uk/QuickGO/GTerm?id=GO:1901616	[]
6	5,6	protein localization to membrane	GO:0072657	0.0611	0.17	0	0	0	0	Cltc|1;Rock2|1;Lypla1|1;Sptbn1|1;Rac1|1;Epb41l3|1	6	1183	126	53607	http://www.ebi.ac.uk/QuickGO/GTerm?id=GO:0072657	[]
4	4	regulation of system process	GO:0044057	0.0611	0.17	0	0	0	0	Ep300|1;Rock2|1;Gnao1|1;Ppp3ca|1;Abat|1;Anxa6|1	6	1183	126	53607	http://www.ebi.ac.uk/QuickGO/GTerm?id=GO:0044057	[]
7	4,5,7	ovulation from ovarian follicle	GO:0001542	0.0616	0.17	0	0	0	0	Afp|1	1	27	126	53607	http://www.ebi.ac.uk/QuickGO/GTerm?id=GO:0001542	[]
5	5	sphingoid metabolic process	GO:0046519	0.0616	0.17	0	0	0	0	Sptlc3|1	1	27	126	53607	http://www.ebi.ac.uk/QuickGO/GTerm?id=GO:0046519	[]
7	7	histamine transport	GO:0051608	0.0616	0.17	0	0	0	0	Ywhaz|1	1	27	126	53607	http://www.ebi.ac.uk/QuickGO/GTerm?id=GO:0051608	[]
9	7,8,9	ammonium transmembrane transport	GO:0072488	0.0616	0.17	0	0	0	0	Slc12a2|1	1	27	126	53607	http://www.ebi.ac.uk/QuickGO/GTerm?id=GO:0072488	[]
8	5,6,8	regulation of bicellular tight junction assembly	GO:2000810	0.0616	0.17	0	0	0	0	Rock2|1	1	27	126	53607	http://www.ebi.ac.uk/QuickGO/GTerm?id=GO:2000810	[]
11	9,10,11	regulation of NFAT protein import into nucleus	GO:0051532	0.0616	0.17	0	0	0	0	Ppp3ca|1	1	27	126	53607	http://www.ebi.ac.uk/QuickGO/GTerm?id=GO:0051532	[]
8	7,8	transcription from mitochondrial promoter	GO:0006390	0.0616	0.17	0	0	0	0	Tfam|1	1	27	126	53607	http://www.ebi.ac.uk/QuickGO/GTerm?id=GO:0006390	[]
6	6	cerebral cortex GABAergic interneuron differentiation	GO:0021892	0.0616	0.17	0	0	0	0	Rac1|1	1	27	126	53607	http://www.ebi.ac.uk/QuickGO/GTerm?id=GO:0021892	[]
7	5,7	positive regulation of leukocyte chemotaxis	GO:0002690	0.0616	0.17	0	0	0	0	Rac1|1;Calr|1	2	171	126	53607	http://www.ebi.ac.uk/QuickGO/GTerm?id=GO:0002690	[]
5	5	nitric oxide metabolic process	GO:0046209	0.0616	0.17	0	0	0	0	Hsp90ab1|1;Ass1|1	2	171	126	53607	http://www.ebi.ac.uk/QuickGO/GTerm?id=GO:0046209	[]
12	9,10,11,12	alternative mRNA splicing, via spliceosome	GO:0000380	0.0623	0.171	0	0	0	0	Hnrnpa1|1;Hnrnpm|1	2	172	126	53607	http://www.ebi.ac.uk/QuickGO/GTerm?id=GO:0000380	[]
7	7	hexose biosynthetic process	GO:0019319	0.0623	0.171	0	0	0	0	Gpd2|1;Tpi1|1	2	172	126	53607	http://www.ebi.ac.uk/QuickGO/GTerm?id=GO:0019319	[]
4	4	membrane organization	GO:0061024	0.0627	0.172	0	0	0	0	Spta1|1;Cltc|1;Rock2|1;Lypla1|1;Immt|1;Sptbn1|1;Cnp|1;Rac1|1;Sh3gl2|1;Epb41l3|1	10	2444	126	53607	http://www.ebi.ac.uk/QuickGO/GTerm?id=GO:0061024	[]
6	4,6	response to hypoxia	GO:0001666	0.0628	0.172	0	0	0	0	Ep300|1;Abat|1;Pdk1|1;Hspd1|1	4	633	126	53607	http://www.ebi.ac.uk/QuickGO/GTerm?id=GO:0001666	[]
8	5,7,8	dendrite morphogenesis	GO:0048813	0.0628	0.172	0	0	0	0	Rock2|1;Ppp3ca|1;Rac1|1	3	385	126	53607	http://www.ebi.ac.uk/QuickGO/GTerm?id=GO:0048813	[]
7	6,7	establishment of protein localization to plasma membrane	GO:0090002	0.0628	0.172	0	0	0	0	Rock2|1;Lypla1|1;Sptbn1|1	3	385	126	53607	http://www.ebi.ac.uk/QuickGO/GTerm?id=GO:0090002	[]
4	4	interaction with symbiont	GO:0051702	0.0629	0.172	0	0	0	0	Ep300|1;Hspd1|1	2	173	126	53607	http://www.ebi.ac.uk/QuickGO/GTerm?id=GO:0051702	[]
6	6	nucleobase-containing compound transport	GO:0015931	0.0632	0.173	0	0	0	0	Hnrnpa1|1;Hnrnpa2b1|1;Lrpprc|1	3	386	126	53607	http://www.ebi.ac.uk/QuickGO/GTerm?id=GO:0015931	[]
6	5,6	regulation of intracellular steroid hormone receptor signaling pathway	GO:0033143	0.0635	0.173	0	0	0	0	Ep300|1;Calr|1	2	174	126	53607	http://www.ebi.ac.uk/QuickGO/GTerm?id=GO:0033143	[]
7	7	L-amino acid transport	GO:0015807	0.0635	0.173	0	0	0	0	Slc1a2|1;Slc32a1|1	2	174	126	53607	http://www.ebi.ac.uk/QuickGO/GTerm?id=GO:0015807	[]
5	5	vesicle localization	GO:0051648	0.0637	0.173	0	0	0	0	Cyfip1|1;Syn1|1;Sh3gl2|1;Amph|1	4	636	126	53607	http://www.ebi.ac.uk/QuickGO/GTerm?id=GO:0051648	[]
8	8	glucose catabolic process	GO:0006007	0.0638	0.173	0	0	0	0	Ldha|1	1	28	126	53607	http://www.ebi.ac.uk/QuickGO/GTerm?id=GO:0006007	[]
6	5,6	embryonic cleavage	GO:0040016	0.0638	0.173	0	0	0	0	Top1|1	1	28	126	53607	http://www.ebi.ac.uk/QuickGO/GTerm?id=GO:0040016	[]
7	7	distal tubule development	GO:0072017	0.0638	0.173	0	0	0	0	Calb1|1	1	28	126	53607	http://www.ebi.ac.uk/QuickGO/GTerm?id=GO:0072017	[]
8	4,6,7,8	positive regulation of ruffle assembly	GO:1900029	0.0638	0.173	0	0	0	0	Cyfip1|1	1	28	126	53607	http://www.ebi.ac.uk/QuickGO/GTerm?id=GO:1900029	[]
6	5,6	synaptic vesicle clustering	GO:0097091	0.0638	0.173	0	0	0	0	Syn1|1	1	28	126	53607	http://www.ebi.ac.uk/QuickGO/GTerm?id=GO:0097091	[]
7	7	cellular protein complex disassembly	GO:0043624	0.064	0.173	0	0	0	0	Spta1|1;Sptbn1|1;Sh3gl2|1	3	388	126	53607	http://www.ebi.ac.uk/QuickGO/GTerm?id=GO:0043624	[]
4	4	negative regulation of catabolic process	GO:0009895	0.0642	0.174	0	0	0	0	Pabpc1|1;Dbi|1;Lrpprc|1;Hsp90ab1|1	4	638	126	53607	http://www.ebi.ac.uk/QuickGO/GTerm?id=GO:0009895	[]
6	6	regulation of fatty acid metabolic process	GO:0019217	0.0654	0.177	0	0	0	0	Dbi|1;Pdk1|1	2	177	126	53607	http://www.ebi.ac.uk/QuickGO/GTerm?id=GO:0019217	[]
4	4	tissue remodeling	GO:0048771	0.0655	0.177	0	0	0	0	Rock2|1;Ppp3ca|1;Rac1|1	3	392	126	53607	http://www.ebi.ac.uk/QuickGO/GTerm?id=GO:0048771	[]
6	6	myeloid cell differentiation	GO:0030099	0.0656	0.177	0	0	0	0	Ep300|1;Hbb-b1|1;Prdx3|1;Hba|1;Hspa9|1	5	916	126	53607	http://www.ebi.ac.uk/QuickGO/GTerm?id=GO:0030099	[]
6	6	protein-DNA complex assembly	GO:0065004	0.0659	0.177	0	0	0	0	Ep300|1;H3f3c|1;H2afy2|1	3	393	126	53607	http://www.ebi.ac.uk/QuickGO/GTerm?id=GO:0065004	[]
8	7,8	gamma-aminobutyric acid secretion	GO:0014051	0.066	0.177	0	0	0	0	Abat|1	1	29	126	53607	http://www.ebi.ac.uk/QuickGO/GTerm?id=GO:0014051	[]
7	7	cellular response to lithium ion	GO:0071285	0.066	0.177	0	0	0	0	Calr|1	1	29	126	53607	http://www.ebi.ac.uk/QuickGO/GTerm?id=GO:0071285	[]
11	7,9,10,11	regulation of translational initiation by eIF2 alpha phosphorylation	GO:0010998	0.066	0.177	0	0	0	0	Hbb-b1|1	1	29	126	53607	http://www.ebi.ac.uk/QuickGO/GTerm?id=GO:0010998	[]
7	6,7	transferrin transport	GO:0033572	0.066	0.177	0	0	0	0	Cltc|1	1	29	126	53607	http://www.ebi.ac.uk/QuickGO/GTerm?id=GO:0033572	[]
8	6,7,8	regulation of tumor necrosis factor secretion	GO:1904467	0.066	0.177	0	0	0	0	Hspd1|1	1	29	126	53607	http://www.ebi.ac.uk/QuickGO/GTerm?id=GO:1904467	[]
8	7,8	protein depalmitoylation	GO:0002084	0.066	0.177	0	0	0	0	Lypla1|1	1	29	126	53607	http://www.ebi.ac.uk/QuickGO/GTerm?id=GO:0002084	[]
6	6	vesicle uncoating	GO:0072319	0.066	0.177	0	0	0	0	Sh3gl2|1	1	29	126	53607	http://www.ebi.ac.uk/QuickGO/GTerm?id=GO:0072319	[]
5	5	response to vitamin	GO:0033273	0.0661	0.177	0	0	0	0	Atp2b1|1;Eef2|1	2	178	126	53607	http://www.ebi.ac.uk/QuickGO/GTerm?id=GO:0033273	[]
5	5	response to growth factor	GO:0070848	0.0667	0.178	0	0	0	0	Ep300|1;Cyfip1|1;Rock2|1;Ube2o|1;Eef2|1;Hsp90ab1|1;Sh3gl2|1	7	1513	126	53607	http://www.ebi.ac.uk/QuickGO/GTerm?id=GO:0070848	[]
5	5	regulation of neuronal synaptic plasticity	GO:0048168	0.0667	0.178	0	0	0	0	Syn1|1;Rac1|1	2	179	126	53607	http://www.ebi.ac.uk/QuickGO/GTerm?id=GO:0048168	[]
10	7,9,10	gene silencing by miRNA	GO:0035195	0.0667	0.178	0	0	0	0	Hnrnpa2b1|1;Ppp3ca|1	2	179	126	53607	http://www.ebi.ac.uk/QuickGO/GTerm?id=GO:0035195	[]
5	5	response to decreased oxygen levels	GO:0036293	0.0669	0.179	0	0	0	0	Ep300|1;Abat|1;Pdk1|1;Hspd1|1	4	647	126	53607	http://www.ebi.ac.uk/QuickGO/GTerm?id=GO:0036293	[]
7	6,7	regulation of fibril organization	GO:1902903	0.0675	0.18	0	0	0	0	Spta1|1;Cyfip1|1;Sptbn1|1;Rac1|1	4	649	126	53607	http://www.ebi.ac.uk/QuickGO/GTerm?id=GO:1902903	[]
4	4	female pregnancy	GO:0007565	0.0679	0.18	0	0	0	0	Prdx3|1;Got2|1;Calr|1	3	398	126	53607	http://www.ebi.ac.uk/QuickGO/GTerm?id=GO:0007565	[]
4	4	reactive nitrogen species metabolic process	GO:2001057	0.068	0.18	0	0	0	0	Hsp90ab1|1;Ass1|1	2	181	126	53607	http://www.ebi.ac.uk/QuickGO/GTerm?id=GO:2001057	[]
4	4	response to salt	GO:1902074	0.0682	0.18	0	0	0	0	Hnrnpa1|1	1	30	126	53607	http://www.ebi.ac.uk/QuickGO/GTerm?id=GO:1902074	[]
11	8,9,10,11	regulation of nuclear-transcribed mRNA poly(A) tail shortening	GO:0060211	0.0682	0.18	0	0	0	0	Pabpc1|1	1	30	126	53607	http://www.ebi.ac.uk/QuickGO/GTerm?id=GO:0060211	[]
8	6,7,8	positive regulation of beta-amyloid formation	GO:1902004	0.0682	0.18	0	0	0	0	Rock2|1	1	30	126	53607	http://www.ebi.ac.uk/QuickGO/GTerm?id=GO:1902004	[]
12	8,9,10,11,12	positive regulation of nuclear-transcribed mRNA poly(A) tail shortening	GO:0060213	0.0682	0.18	0	0	0	0	Pabpc1|1	1	30	126	53607	http://www.ebi.ac.uk/QuickGO/GTerm?id=GO:0060213	[]
9	5,6,7,8,9	regulation of neurotrophin TRK receptor signaling pathway	GO:0051386	0.0682	0.18	0	0	0	0	Cyfip1|1	1	30	126	53607	http://www.ebi.ac.uk/QuickGO/GTerm?id=GO:0051386	[]
6	6	diaphragm development	GO:0060539	0.0682	0.18	0	0	0	0	Ass1|1	1	30	126	53607	http://www.ebi.ac.uk/QuickGO/GTerm?id=GO:0060539	[]
6	5,6	neuron cellular homeostasis	GO:0070050	0.0682	0.18	0	0	0	0	Calb1|1	1	30	126	53607	http://www.ebi.ac.uk/QuickGO/GTerm?id=GO:0070050	[]
8	7,8	glucocorticoid receptor signaling pathway	GO:0042921	0.0682	0.18	0	0	0	0	Ptges3|1	1	30	126	53607	http://www.ebi.ac.uk/QuickGO/GTerm?id=GO:0042921	[]
9	4,7,8,9	positive regulation of keratinocyte differentiation	GO:0045618	0.0682	0.18	0	0	0	0	H2afy2|1	1	30	126	53607	http://www.ebi.ac.uk/QuickGO/GTerm?id=GO:0045618	[]
7	7	L-serine metabolic process	GO:0006563	0.0682	0.18	0	0	0	0	Psat1|1	1	30	126	53607	http://www.ebi.ac.uk/QuickGO/GTerm?id=GO:0006563	[]
8	8	fatty acid beta-oxidation using acyl-CoA dehydrogenase	GO:0033539	0.0682	0.18	0	0	0	0	Etfdh|1	1	30	126	53607	http://www.ebi.ac.uk/QuickGO/GTerm?id=GO:0033539	[]
7	7	hyaluronan biosynthetic process	GO:0030213	0.0682	0.18	0	0	0	0	Cltc|1	1	30	126	53607	http://www.ebi.ac.uk/QuickGO/GTerm?id=GO:0030213	[]
6	6	monosaccharide biosynthetic process	GO:0046364	0.0687	0.181	0	0	0	0	Gpd2|1;Tpi1|1	2	182	126	53607	http://www.ebi.ac.uk/QuickGO/GTerm?id=GO:0046364	[]
12	8,9,12	histone H3 acetylation	GO:0043966	0.0693	0.182	0	0	0	0	Ep300|1;Jade3|1	2	183	126	53607	http://www.ebi.ac.uk/QuickGO/GTerm?id=GO:0043966	[]
5	5	long-term synaptic potentiation	GO:0060291	0.0693	0.182	0	0	0	0	Dbi|1;Calb1|1	2	183	126	53607	http://www.ebi.ac.uk/QuickGO/GTerm?id=GO:0060291	[]
6	4,5,6	hormone-mediated signaling pathway	GO:0009755	0.0695	0.182	0	0	0	0	Ep300|1;Ptges3|1;Calr|1	3	402	126	53607	http://www.ebi.ac.uk/QuickGO/GTerm?id=GO:0009755	[]
9	6,8,9	posttranscriptional gene silencing by RNA	GO:0035194	0.07	0.183	0	0	0	0	Hnrnpa2b1|1;Ppp3ca|1	2	184	126	53607	http://www.ebi.ac.uk/QuickGO/GTerm?id=GO:0035194	[]
9	8,9	phosphate ion transmembrane transport	GO:0035435	0.0704	0.183	0	0	0	0	Slc25a3|1	1	31	126	53607	http://www.ebi.ac.uk/QuickGO/GTerm?id=GO:0035435	[]
8	6,7,8	establishment of protein localization to chromosome	GO:0070199	0.0704	0.183	0	0	0	0	H2afy2|1	1	31	126	53607	http://www.ebi.ac.uk/QuickGO/GTerm?id=GO:0070199	[]
4	4	lung saccule development	GO:0060430	0.0704	0.183	0	0	0	0	Ptges3|1	1	31	126	53607	http://www.ebi.ac.uk/QuickGO/GTerm?id=GO:0060430	[]
6	5,6	positive regulation of centrosome cycle	GO:0046607	0.0704	0.183	0	0	0	0	Rock2|1	1	31	126	53607	http://www.ebi.ac.uk/QuickGO/GTerm?id=GO:0046607	[]
4	4	collecting duct development	GO:0072044	0.0704	0.183	0	0	0	0	Calb1|1	1	31	126	53607	http://www.ebi.ac.uk/QuickGO/GTerm?id=GO:0072044	[]
9	7,8,9	coenzyme A biosynthetic process	GO:0015937	0.0704	0.183	0	0	0	0	Acat1|1	1	31	126	53607	http://www.ebi.ac.uk/QuickGO/GTerm?id=GO:0015937	[]
10	8,9,10	NFAT protein import into nucleus	GO:0051531	0.0704	0.183	0	0	0	0	Ppp3ca|1	1	31	126	53607	http://www.ebi.ac.uk/QuickGO/GTerm?id=GO:0051531	[]
13	8,9,10,12,13	positive regulation of Arp2/3 complex-mediated actin nucleation	GO:2000601	0.0704	0.183	0	0	0	0	Cyfip1|1	1	31	126	53607	http://www.ebi.ac.uk/QuickGO/GTerm?id=GO:2000601	[]
6	6	tumor necrosis factor secretion	GO:1990774	0.0704	0.183	0	0	0	0	Hspd1|1	1	31	126	53607	http://www.ebi.ac.uk/QuickGO/GTerm?id=GO:1990774	[]
7	6,7	regulation of synaptic vesicle recycling	GO:1903421	0.0704	0.183	0	0	0	0	Cyfip1|1	1	31	126	53607	http://www.ebi.ac.uk/QuickGO/GTerm?id=GO:1903421	[]
12	5,7,8,9,11,12	regulation of production of miRNAs involved in gene silencing by miRNA	GO:1903798	0.0704	0.183	0	0	0	0	Ppp3ca|1	1	31	126	53607	http://www.ebi.ac.uk/QuickGO/GTerm?id=GO:1903798	[]
6	6	regulation of cell morphogenesis involved in differentiation	GO:0010769	0.0706	0.183	0	0	0	0	Ep300|1;Cyfip1|1;Ppp3ca|1;Rac1|1;Calr|1	5	936	126	53607	http://www.ebi.ac.uk/QuickGO/GTerm?id=GO:0010769	[]
7	5,6,7	regulation of DNA metabolic process	GO:0051052	0.0711	0.184	0	0	0	0	Hnrnpa2b1|1;Ptges3|1;Hsp90ab1|1;Rac1|1;Calr|1	5	938	126	53607	http://www.ebi.ac.uk/QuickGO/GTerm?id=GO:0051052	[]
8	5,7,8	posttranscriptional gene silencing	GO:0016441	0.0713	0.185	0	0	0	0	Hnrnpa2b1|1;Ppp3ca|1	2	186	126	53607	http://www.ebi.ac.uk/QuickGO/GTerm?id=GO:0016441	[]
9	8,9	cellular metal ion homeostasis	GO:0006875	0.0717	0.185	0	0	0	0	Dbi|1;Immt|1;Atp2b1|1;Ywhae|1;Anxa6|1;Calb1|1	6	1234	126	53607	http://www.ebi.ac.uk/QuickGO/GTerm?id=GO:0006875	[]
4	4	positive regulation of viral process	GO:0048524	0.072	0.185	0	0	0	0	Pabpc1|1;Ep300|1	2	187	126	53607	http://www.ebi.ac.uk/QuickGO/GTerm?id=GO:0048524	[]
10	5,7,10	olfactory bulb interneuron differentiation	GO:0021889	0.0726	0.185	0	0	0	0	Rac1|1	1	32	126	53607	http://www.ebi.ac.uk/QuickGO/GTerm?id=GO:0021889	[]
10	4,6,7,9,10	regulation of production of small RNA involved in gene silencing by RNA	GO:0070920	0.0726	0.185	0	0	0	0	Ppp3ca|1	1	32	126	53607	http://www.ebi.ac.uk/QuickGO/GTerm?id=GO:0070920	[]
6	5,6	transcytosis	GO:0045056	0.0726	0.185	0	0	0	0	Cltc|1	1	32	126	53607	http://www.ebi.ac.uk/QuickGO/GTerm?id=GO:0045056	[]
7	7	glomerular visceral epithelial cell differentiation	GO:0072112	0.0726	0.185	0	0	0	0	Basp1|1	1	32	126	53607	http://www.ebi.ac.uk/QuickGO/GTerm?id=GO:0072112	[]
8	8	transcription of nuclear large rRNA transcript from RNA polymerase I promoter	GO:0042790	0.0726	0.185	0	0	0	0	H2afy2|1	1	32	126	53607	http://www.ebi.ac.uk/QuickGO/GTerm?id=GO:0042790	[]
5	5	regulation of response to interferon-gamma	GO:0060330	0.0726	0.185	0	0	0	0	Hsp90ab1|1	1	32	126	53607	http://www.ebi.ac.uk/QuickGO/GTerm?id=GO:0060330	[]
6	6	response to stilbenoid	GO:0035634	0.0726	0.185	0	0	0	0	Hba|1	1	32	126	53607	http://www.ebi.ac.uk/QuickGO/GTerm?id=GO:0035634	[]
7	7	protein localization to endosome	GO:0036010	0.0726	0.185	0	0	0	0	Rock2|1	1	32	126	53607	http://www.ebi.ac.uk/QuickGO/GTerm?id=GO:0036010	[]
6	6	citrulline metabolic process	GO:0000052	0.0726	0.185	0	0	0	0	Ass1|1	1	32	126	53607	http://www.ebi.ac.uk/QuickGO/GTerm?id=GO:0000052	[]
9	7,9	GABAergic neuron differentiation	GO:0097154	0.0726	0.185	0	0	0	0	Rac1|1	1	32	126	53607	http://www.ebi.ac.uk/QuickGO/GTerm?id=GO:0097154	[]
6	6	renal filtration cell differentiation	GO:0061318	0.0726	0.185	0	0	0	0	Basp1|1	1	32	126	53607	http://www.ebi.ac.uk/QuickGO/GTerm?id=GO:0061318	[]
9	6,7,8,9	regulation of interferon-gamma-mediated signaling pathway	GO:0060334	0.0726	0.185	0	0	0	0	Hsp90ab1|1	1	32	126	53607	http://www.ebi.ac.uk/QuickGO/GTerm?id=GO:0060334	[]
9	5,6,7,9	negative regulation of glial cell proliferation	GO:0060253	0.0726	0.185	0	0	0	0	Idh2|1	1	32	126	53607	http://www.ebi.ac.uk/QuickGO/GTerm?id=GO:0060253	[]
7	7	regulation of dephosphorylation	GO:0035303	0.0728	0.186	0	0	0	0	Rock2|1;Ywhae|1;Hsp90ab1|1	3	410	126	53607	http://www.ebi.ac.uk/QuickGO/GTerm?id=GO:0035303	[]
4	4	response to temperature stimulus	GO:0009266	0.0728	0.186	0	0	0	0	Atp2b1|1;Ywhae|1;Hspd1|1	3	410	126	53607	http://www.ebi.ac.uk/QuickGO/GTerm?id=GO:0009266	[]
8	7,8	dicarboxylic acid transport	GO:0006835	0.0733	0.187	0	0	0	0	Abat|1;Slc1a2|1	2	189	126	53607	http://www.ebi.ac.uk/QuickGO/GTerm?id=GO:0006835	[]
12	8,9,12	histone H4 acetylation	GO:0043967	0.0733	0.187	0	0	0	0	Ep300|1;Jade3|1	2	189	126	53607	http://www.ebi.ac.uk/QuickGO/GTerm?id=GO:0043967	[]
7	6,7	regulation of DNA biosynthetic process	GO:2000278	0.0733	0.187	0	0	0	0	Ptges3|1;Hsp90ab1|1	2	189	126	53607	http://www.ebi.ac.uk/QuickGO/GTerm?id=GO:2000278	[]
11	8,9,10,11	positive regulation of ATP biosynthetic process	GO:2001171	0.0747	0.189	0	0	0	0	Ndufc2|1	1	33	126	53607	http://www.ebi.ac.uk/QuickGO/GTerm?id=GO:2001171	[]
8	7,8	proton-transporting two-sector ATPase complex assembly	GO:0070071	0.0747	0.189	0	0	0	0	Atp6v0a1|1	1	33	126	53607	http://www.ebi.ac.uk/QuickGO/GTerm?id=GO:0070071	[]
8	6,7,8	positive regulation of amyloid precursor protein catabolic process	GO:1902993	0.0747	0.189	0	0	0	0	Rock2|1	1	33	126	53607	http://www.ebi.ac.uk/QuickGO/GTerm?id=GO:1902993	[]
8	7,8	dosage compensation	GO:0007549	0.0747	0.189	0	0	0	0	H2afy2|1	1	33	126	53607	http://www.ebi.ac.uk/QuickGO/GTerm?id=GO:0007549	[]
6	6	regulation of dopamine metabolic process	GO:0042053	0.0747	0.189	0	0	0	0	Abat|1	1	33	126	53607	http://www.ebi.ac.uk/QuickGO/GTerm?id=GO:0042053	[]
6	6	response to phenylpropanoid	GO:0080184	0.0747	0.189	0	0	0	0	Hba|1	1	33	126	53607	http://www.ebi.ac.uk/QuickGO/GTerm?id=GO:0080184	[]
7	6,7	glomerular epithelial cell differentiation	GO:0072311	0.0747	0.189	0	0	0	0	Basp1|1	1	33	126	53607	http://www.ebi.ac.uk/QuickGO/GTerm?id=GO:0072311	[]
6	6	amino acid import into cell	GO:1902837	0.0747	0.189	0	0	0	0	Slc1a2|1	1	33	126	53607	http://www.ebi.ac.uk/QuickGO/GTerm?id=GO:1902837	[]
5	5	nucleobase-containing compound biosynthetic process	GO:0034654	0.0754	0.19	0	0	0	0	Ywhaq|1;Cbx1|1;H2afz|1;Ep300|1;H2afj|1;Atp5j|1;Tfam|1;Hmgn2|1;Hnrnpa2b1|1;Idh2|1;Atp5d|1;Taf6|1;Ptges3|1;Lrpprc|1;Atp5h|1;Ndufc2|1;Prdx3|1;Ube2o|1;Ppp3ca|1;Atp5f1|1;Atp5o|1;Eno1|1;Tceal3|1;H2afy2|1;Pura|1;Atp6v0a1|1;Top1|1;Acat1|1;Basp1|1;Atp5e|1;Hsp90ab1|1;Atp5a1|1;Calr|1	33	11018	126	53607	http://www.ebi.ac.uk/QuickGO/GTerm?id=GO:0034654	[]
6	4,6	regulation of hemostasis	GO:1900046	0.076	0.192	0	0	0	0	Abat|1;Anxa5|1	2	193	126	53607	http://www.ebi.ac.uk/QuickGO/GTerm?id=GO:1900046	[]
7	5,6,7	regulation of blood coagulation	GO:0030193	0.076	0.192	0	0	0	0	Abat|1;Anxa5|1	2	193	126	53607	http://www.ebi.ac.uk/QuickGO/GTerm?id=GO:0030193	[]
3	3	response to stress	GO:0006950	0.0762	0.192	0	0	0	0	Ywhaz|1;Ep300|1;Dbi|1;Hbb-b1|1;Etfdh|1;Aco2|1;Ndufc2|1;Prdx3|1;Gnao1|1;Ppp3ca|1;Hspa4l|1;Abat|1;Atp2b1|1;Eef2|1;Anxa5|1;Pdk1|1;Ywhae|1;Ndufb4|1;Acat1|1;Hsp90ab1|1;Ass1|1;Slc1a2|1;Rac1|1;Hspd1|1;Slc12a2|1;Macrod1|1;Mdh1|1;Calr|1	28	9094	126	53607	http://www.ebi.ac.uk/QuickGO/GTerm?id=GO:0006950	[]
3	3	myeloid cell homeostasis	GO:0002262	0.0766	0.192	0	0	0	0	Hbb-b1|1;Hba|1;Hspa9|1	3	419	126	53607	http://www.ebi.ac.uk/QuickGO/GTerm?id=GO:0002262	[]
8	7,8	negative regulation of protein dephosphorylation	GO:0035308	0.0767	0.192	0	0	0	0	Rock2|1;Ywhae|1	2	194	126	53607	http://www.ebi.ac.uk/QuickGO/GTerm?id=GO:0035308	[]
4	4	hippocampus development	GO:0021766	0.0767	0.192	0	0	0	0	Ywhae|1;Slc32a1|1	2	194	126	53607	http://www.ebi.ac.uk/QuickGO/GTerm?id=GO:0021766	[]
7	6,7	cell morphogenesis involved in neuron differentiation	GO:0048667	0.0769	0.192	0	0	0	0	Ep300|1;Cyfip1|1;Rock2|1;Ppp3ca|1;Cnp|1;Hsp90ab1|1;Rac1|1	7	1566	126	53607	http://www.ebi.ac.uk/QuickGO/GTerm?id=GO:0048667	[]
7	6,7	cellular response to vitamin D	GO:0071305	0.0769	0.192	0	0	0	0	Atp2b1|1	1	34	126	53607	http://www.ebi.ac.uk/QuickGO/GTerm?id=GO:0071305	[]
7	7	macromolecule depalmitoylation	GO:0098734	0.0769	0.192	0	0	0	0	Lypla1|1	1	34	126	53607	http://www.ebi.ac.uk/QuickGO/GTerm?id=GO:0098734	[]
10	6,8,9,10	regulation of translational initiation in response to stress	GO:0043558	0.0769	0.192	0	0	0	0	Hbb-b1|1	1	34	126	53607	http://www.ebi.ac.uk/QuickGO/GTerm?id=GO:0043558	[]
5	5	positive regulation of membrane potential	GO:0045838	0.0769	0.192	0	0	0	0	Ndufc2|1	1	34	126	53607	http://www.ebi.ac.uk/QuickGO/GTerm?id=GO:0045838	[]
7	6,7	corticosteroid receptor signaling pathway	GO:0031958	0.0769	0.192	0	0	0	0	Ptges3|1	1	34	126	53607	http://www.ebi.ac.uk/QuickGO/GTerm?id=GO:0031958	[]
8	8	response to glucose	GO:0009749	0.077	0.192	0	0	0	0	Ep300|1;Ppp3ca|1;Vsnl1|1	3	420	126	53607	http://www.ebi.ac.uk/QuickGO/GTerm?id=GO:0009749	[]
5	5	mitophagy	GO:0000422	0.0774	0.193	0	0	0	0	Anxa5|1;Pdk1|1;Mdh1|1	3	421	126	53607	http://www.ebi.ac.uk/QuickGO/GTerm?id=GO:0000422	[]
7	6,7	mitochondrion disassembly	GO:0061726	0.0774	0.193	0	0	0	0	Anxa5|1;Pdk1|1;Mdh1|1	3	421	126	53607	http://www.ebi.ac.uk/QuickGO/GTerm?id=GO:0061726	[]
7	5,6,7	negative regulation of ion transmembrane transport	GO:0034766	0.0781	0.194	0	0	0	0	Ywhaq|1;Ywhae|1	2	196	126	53607	http://www.ebi.ac.uk/QuickGO/GTerm?id=GO:0034766	[]
11	6,7,8,9,11	positive regulation of neuron projection development	GO:0010976	0.0781	0.194	0	0	0	0	Ep300|1;Negr1|1;Cyfip1|1;Rac1|1	4	683	126	53607	http://www.ebi.ac.uk/QuickGO/GTerm?id=GO:0010976	[]
4	4	dendrite development	GO:0016358	0.0787	0.195	0	0	0	0	Cyfip1|1;Rock2|1;Ppp3ca|1;Rac1|1	4	685	126	53607	http://www.ebi.ac.uk/QuickGO/GTerm?id=GO:0016358	[]
9	6,7,8,9	negative regulation of protein polymerization	GO:0032272	0.0787	0.195	0	0	0	0	Spta1|1;Sptbn1|1	2	197	126	53607	http://www.ebi.ac.uk/QuickGO/GTerm?id=GO:0032272	[]
5	4,5	fatty-acyl-CoA metabolic process	GO:0035337	0.0791	0.195	0	0	0	0	Mcee|1	1	35	126	53607	http://www.ebi.ac.uk/QuickGO/GTerm?id=GO:0035337	[]
5	5	isotype switching to IgG isotypes	GO:0048291	0.0791	0.195	0	0	0	0	Hspd1|1	1	35	126	53607	http://www.ebi.ac.uk/QuickGO/GTerm?id=GO:0048291	[]
9	6,8,9	regulation of fatty acid beta-oxidation	GO:0031998	0.0791	0.195	0	0	0	0	Dbi|1	1	35	126	53607	http://www.ebi.ac.uk/QuickGO/GTerm?id=GO:0031998	[]
7	5,6,7	regulation of catecholamine metabolic process	GO:0042069	0.0791	0.195	0	0	0	0	Abat|1	1	35	126	53607	http://www.ebi.ac.uk/QuickGO/GTerm?id=GO:0042069	[]
6	6	transition between fast and slow fiber	GO:0014883	0.0791	0.195	0	0	0	0	Ppp3ca|1	1	35	126	53607	http://www.ebi.ac.uk/QuickGO/GTerm?id=GO:0014883	[]
5	5	amino-acid betaine metabolic process	GO:0006577	0.0791	0.195	0	0	0	0	Aldh7a1|1	1	35	126	53607	http://www.ebi.ac.uk/QuickGO/GTerm?id=GO:0006577	[]
7	7	endothelial cell migration	GO:0043542	0.0792	0.195	0	0	0	0	Rock2|1;Atp5a1|1;Calr|1	3	425	126	53607	http://www.ebi.ac.uk/QuickGO/GTerm?id=GO:0043542	[]
11	10,11	regulation of cytosolic calcium ion concentration	GO:0051480	0.0794	0.196	0	0	0	0	Dbi|1;Atp2b1|1;Ywhae|1;Calb1|1	4	687	126	53607	http://www.ebi.ac.uk/QuickGO/GTerm?id=GO:0051480	[]
4	4	response to acid chemical	GO:0001101	0.0794	0.196	0	0	0	0	Ep300|1;Eef2|1;Ass1|1;Slc1a2|1	4	687	126	53607	http://www.ebi.ac.uk/QuickGO/GTerm?id=GO:0001101	[]
7	5,7	negative regulation of cytoplasmic transport	GO:1903650	0.0794	0.196	0	0	0	0	Cyfip1|1;Lypla1|1	2	198	126	53607	http://www.ebi.ac.uk/QuickGO/GTerm?id=GO:1903650	[]
5	5	cellular lipid catabolic process	GO:0044242	0.0796	0.196	0	0	0	0	Dbi|1;Etfdh|1;Acat1|1	3	426	126	53607	http://www.ebi.ac.uk/QuickGO/GTerm?id=GO:0044242	[]
6	5,6	negative regulation of macromolecule biosynthetic process	GO:0010558	0.08	0.196	0	0	0	0	Ywhaq|1;Cbx1|1;H2afz|1;Ep300|1;H2afj|1;Hmgn2|1;Hnrnpa2b1|1;Cltc|1;Ppp3ca|1;Eno1|1;H2afy2|1;Pura|1;Basp1|1;Calr|1	14	3944	126	53607	http://www.ebi.ac.uk/QuickGO/GTerm?id=GO:0010558	[]
7	7	response to hexose	GO:0009746	0.08	0.196	0	0	0	0	Ep300|1;Ppp3ca|1;Vsnl1|1	3	427	126	53607	http://www.ebi.ac.uk/QuickGO/GTerm?id=GO:0009746	[]
6	5,6	regulation of neuron death	GO:1901214	0.08	0.196	0	0	0	0	Dnajc5|1;Prdx3|1;Hsp90ab1|1;Hspd1|1	4	689	126	53607	http://www.ebi.ac.uk/QuickGO/GTerm?id=GO:1901214	[]
4	4	regulation of response to external stimulus	GO:0032101	0.08	0.196	0	0	0	0	Ndufc2|1;Abat|1;Anxa5|1;Pdk1|1;Rac1|1;Hspd1|1;Mdh1|1;Calr|1	8	1901	126	53607	http://www.ebi.ac.uk/QuickGO/GTerm?id=GO:0032101	[]
7	6,7	positive regulation of axonogenesis	GO:0050772	0.0801	0.196	0	0	0	0	Ep300|1;Cyfip1|1	2	199	126	53607	http://www.ebi.ac.uk/QuickGO/GTerm?id=GO:0050772	[]
6	5,6	mitochondrial membrane organization	GO:0007006	0.0801	0.196	0	0	0	0	Immt|1;Cnp|1	2	199	126	53607	http://www.ebi.ac.uk/QuickGO/GTerm?id=GO:0007006	[]
8	8	peptidyl-serine phosphorylation	GO:0018105	0.0804	0.197	0	0	0	0	Rock2|1;Pdk1|1;Top1|1;Hsp90ab1|1	4	690	126	53607	http://www.ebi.ac.uk/QuickGO/GTerm?id=GO:0018105	[]
5	4,5	regulation of cell junction assembly	GO:1901888	0.0808	0.197	0	0	0	0	Rock2|1;Rac1|1	2	200	126	53607	http://www.ebi.ac.uk/QuickGO/GTerm?id=GO:1901888	[]
8	7,8	cristae formation	GO:0042407	0.0813	0.197	0	0	0	0	Immt|1	1	36	126	53607	http://www.ebi.ac.uk/QuickGO/GTerm?id=GO:0042407	[]
6	5,6	negative regulation of necrotic cell death	GO:0060547	0.0813	0.197	0	0	0	0	Ndufc2|1	1	36	126	53607	http://www.ebi.ac.uk/QuickGO/GTerm?id=GO:0060547	[]
7	7	purine nucleoside bisphosphate biosynthetic process	GO:0034033	0.0813	0.197	0	0	0	0	Acat1|1	1	36	126	53607	http://www.ebi.ac.uk/QuickGO/GTerm?id=GO:0034033	[]
8	6,8	response to corticosterone	GO:0051412	0.0813	0.197	0	0	0	0	Atp2b1|1	1	36	126	53607	http://www.ebi.ac.uk/QuickGO/GTerm?id=GO:0051412	[]
8	6,7,8	negative regulation of protein oligomerization	GO:0032460	0.0813	0.197	0	0	0	0	Ep300|1	1	36	126	53607	http://www.ebi.ac.uk/QuickGO/GTerm?id=GO:0032460	[]
6	5,6	transepithelial transport	GO:0070633	0.0813	0.197	0	0	0	0	Slc12a2|1	1	36	126	53607	http://www.ebi.ac.uk/QuickGO/GTerm?id=GO:0070633	[]
7	6,7	nucleoside bisphosphate biosynthetic process	GO:0033866	0.0813	0.197	0	0	0	0	Acat1|1	1	36	126	53607	http://www.ebi.ac.uk/QuickGO/GTerm?id=GO:0033866	[]
6	6	regulation of short-term neuronal synaptic plasticity	GO:0048172	0.0813	0.197	0	0	0	0	Syn1|1	1	36	126	53607	http://www.ebi.ac.uk/QuickGO/GTerm?id=GO:0048172	[]
8	7,8	ribonucleoside bisphosphate biosynthetic process	GO:0034030	0.0813	0.197	0	0	0	0	Acat1|1	1	36	126	53607	http://www.ebi.ac.uk/QuickGO/GTerm?id=GO:0034030	[]
4	4	dendritic cell migration	GO:0036336	0.0813	0.197	0	0	0	0	Calr|1	1	36	126	53607	http://www.ebi.ac.uk/QuickGO/GTerm?id=GO:0036336	[]
6	6	protein complex disassembly	GO:0043241	0.0813	0.197	0	0	0	0	Spta1|1;Sptbn1|1;Sh3gl2|1	3	430	126	53607	http://www.ebi.ac.uk/QuickGO/GTerm?id=GO:0043241	[]
5	5	response to lipopolysaccharide	GO:0032496	0.0813	0.197	0	0	0	0	Prdx3|1;Cnp|1;Ass1|1;Hspd1|1	4	693	126	53607	http://www.ebi.ac.uk/QuickGO/GTerm?id=GO:0032496	[]
7	7	receptor-mediated endocytosis	GO:0006898	0.082	0.198	0	0	0	0	Cltc|1;Sh3gl2|1;Amph|1;Calr|1	4	695	126	53607	http://www.ebi.ac.uk/QuickGO/GTerm?id=GO:0006898	[]
5	5	viral process	GO:0016032	0.0823	0.199	0	0	0	0	Pabpc1|1;Ep300|1;Rock2|1;Hsp90ab1|1	4	696	126	53607	http://www.ebi.ac.uk/QuickGO/GTerm?id=GO:0016032	[]
4	4	response to oxygen levels	GO:0070482	0.0823	0.199	0	0	0	0	Ep300|1;Abat|1;Pdk1|1;Hspd1|1	4	696	126	53607	http://www.ebi.ac.uk/QuickGO/GTerm?id=GO:0070482	[]
7	7	cation homeostasis	GO:0055080	0.0829	0.199	0	0	0	0	Dbi|1;Immt|1;Atp2b1|1;Ywhae|1;Atp6v0a1|1;Anxa6|1;Calb1|1	7	1595	126	53607	http://www.ebi.ac.uk/QuickGO/GTerm?id=GO:0055080	[]
7	6,7	regulation of NIK/NF-kappaB signaling	GO:1901222	0.0829	0.199	0	0	0	0	Ndufc2|1;Calr|1	2	203	126	53607	http://www.ebi.ac.uk/QuickGO/GTerm?id=GO:1901222	[]
7	6,7	viral genome replication	GO:0019079	0.0829	0.199	0	0	0	0	Pabpc1|1;Rock2|1	2	203	126	53607	http://www.ebi.ac.uk/QuickGO/GTerm?id=GO:0019079	[]
8	7,8	regulation of cytoplasmic translation	GO:2000765	0.0834	0.199	0	0	0	0	Eef2|1	1	37	126	53607	http://www.ebi.ac.uk/QuickGO/GTerm?id=GO:2000765	[]
7	7	substrate-independent telencephalic tangential interneuron migration	GO:0021843	0.0834	0.199	0	0	0	0	Rac1|1	1	37	126	53607	http://www.ebi.ac.uk/QuickGO/GTerm?id=GO:0021843	[]
13	9,10,13	histone H4-K8 acetylation	GO:0043982	0.0834	0.199	0	0	0	0	Jade3|1	1	37	126	53607	http://www.ebi.ac.uk/QuickGO/GTerm?id=GO:0043982	[]
13	9,10,13	histone H4-K5 acetylation	GO:0043981	0.0834	0.199	0	0	0	0	Jade3|1	1	37	126	53607	http://www.ebi.ac.uk/QuickGO/GTerm?id=GO:0043981	[]
6	5,6	glomerular epithelium development	GO:0072010	0.0834	0.199	0	0	0	0	Basp1|1	1	37	126	53607	http://www.ebi.ac.uk/QuickGO/GTerm?id=GO:0072010	[]
6	6	substrate-independent telencephalic tangential migration	GO:0021826	0.0834	0.199	0	0	0	0	Rac1|1	1	37	126	53607	http://www.ebi.ac.uk/QuickGO/GTerm?id=GO:0021826	[]
4	4	response to muscle activity	GO:0014850	0.0834	0.199	0	0	0	0	Got2|1	1	37	126	53607	http://www.ebi.ac.uk/QuickGO/GTerm?id=GO:0014850	[]
10	7,8,9,10	regulation of nuclear-transcribed mRNA catabolic process, deadenylation-dependent decay	GO:1900151	0.0834	0.199	0	0	0	0	Pabpc1|1	1	37	126	53607	http://www.ebi.ac.uk/QuickGO/GTerm?id=GO:1900151	[]
9	9	L-glutamate transmembrane transport	GO:0089711	0.0834	0.199	0	0	0	0	Slc1a2|1	1	37	126	53607	http://www.ebi.ac.uk/QuickGO/GTerm?id=GO:0089711	[]
7	7	positive regulation of nuclear-transcribed mRNA catabolic process, deadenylation-dependent decay	GO:1900153	0.0834	0.199	0	0	0	0	Pabpc1|1	1	37	126	53607	http://www.ebi.ac.uk/QuickGO/GTerm?id=GO:1900153	[]
5	5	glycogen metabolic process	GO:0005977	0.0836	0.199	0	0	0	0	Ptges3|1;Pygb|1	2	204	126	53607	http://www.ebi.ac.uk/QuickGO/GTerm?id=GO:0005977	[]
6	6	glucan metabolic process	GO:0044042	0.0836	0.199	0	0	0	0	Ptges3|1;Pygb|1	2	204	126	53607	http://www.ebi.ac.uk/QuickGO/GTerm?id=GO:0044042	[]
4	4	negative regulation of transmembrane transport	GO:0034763	0.0836	0.199	0	0	0	0	Ywhaq|1;Ywhae|1	2	204	126	53607	http://www.ebi.ac.uk/QuickGO/GTerm?id=GO:0034763	[]
5	4,5	regulation of coagulation	GO:0050818	0.0836	0.199	0	0	0	0	Abat|1;Anxa5|1	2	204	126	53607	http://www.ebi.ac.uk/QuickGO/GTerm?id=GO:0050818	[]
7	6,7	cellular glucan metabolic process	GO:0006073	0.0836	0.199	0	0	0	0	Ptges3|1;Pygb|1	2	204	126	53607	http://www.ebi.ac.uk/QuickGO/GTerm?id=GO:0006073	[]
10	7,8,9,10	negative regulation of cysteine-type endopeptidase activity involved in apoptotic process	GO:0043154	0.0843	0.2	0	0	0	0	Ep300|1;Prdx3|1	2	205	126	53607	http://www.ebi.ac.uk/QuickGO/GTerm?id=GO:0043154	[]
6	6	macroautophagy	GO:0016236	0.0847	0.201	0	0	0	0	Anxa5|1;Pdk1|1;Atp6v0a1|1;Mdh1|1	4	703	126	53607	http://www.ebi.ac.uk/QuickGO/GTerm?id=GO:0016236	[]
8	6,7,8	negative regulation of transcription, DNA-templated	GO:0045892	0.0847	0.201	0	0	0	0	Ywhaq|1;Cbx1|1;H2afz|1;Ep300|1;H2afj|1;Hmgn2|1;Hnrnpa2b1|1;Eno1|1;H2afy2|1;Pura|1;Basp1|1;Calr|1	12	3277	126	53607	http://www.ebi.ac.uk/QuickGO/GTerm?id=GO:0045892	[]
7	6,7	carboxylic acid transport	GO:0046942	0.085	0.201	0	0	0	0	Got2|1;Abat|1;Slc1a2|1;Slc32a1|1	4	704	126	53607	http://www.ebi.ac.uk/QuickGO/GTerm?id=GO:0046942	[]
5	5	chemical homeostasis	GO:0048878	0.0853	0.201	0	0	0	0	Ep300|1;Dbi|1;Immt|1;Ppp3ca|1;Atp2b1|1;Ywhae|1;Atp6v0a1|1;Anxa6|1;Calb1|1;Vsnl1|1	10	2594	126	53607	http://www.ebi.ac.uk/QuickGO/GTerm?id=GO:0048878	[]
8	5,7,8	pancreatic juice secretion	GO:0030157	0.0856	0.201	0	0	0	0	Copa|1	1	38	126	53607	http://www.ebi.ac.uk/QuickGO/GTerm?id=GO:0030157	[]
7	7	cellular biogenic amine catabolic process	GO:0042402	0.0856	0.201	0	0	0	0	Sat2|1	1	38	126	53607	http://www.ebi.ac.uk/QuickGO/GTerm?id=GO:0042402	[]
7	7	serine family amino acid biosynthetic process	GO:0009070	0.0856	0.201	0	0	0	0	Psat1|1	1	38	126	53607	http://www.ebi.ac.uk/QuickGO/GTerm?id=GO:0009070	[]
5	5	positive regulation of response to tumor cell	GO:0002836	0.0856	0.201	0	0	0	0	Hspd1|1	1	38	126	53607	http://www.ebi.ac.uk/QuickGO/GTerm?id=GO:0002836	[]
11	8,10,11	regulation of ATP biosynthetic process	GO:2001169	0.0856	0.201	0	0	0	0	Ndufc2|1	1	38	126	53607	http://www.ebi.ac.uk/QuickGO/GTerm?id=GO:2001169	[]
6	5,6	positive regulation of cellular amine metabolic process	GO:0033240	0.0856	0.201	0	0	0	0	Abat|1	1	38	126	53607	http://www.ebi.ac.uk/QuickGO/GTerm?id=GO:0033240	[]
7	5,6,7	positive regulation of immune response to tumor cell	GO:0002839	0.0856	0.201	0	0	0	0	Hspd1|1	1	38	126	53607	http://www.ebi.ac.uk/QuickGO/GTerm?id=GO:0002839	[]
9	5,6,7,8,9	negative regulation of platelet activation	GO:0010544	0.0856	0.201	0	0	0	0	Abat|1	1	38	126	53607	http://www.ebi.ac.uk/QuickGO/GTerm?id=GO:0010544	[]
5	5	positive regulation of dendrite development	GO:1900006	0.0857	0.201	0	0	0	0	Cyfip1|1;Rac1|1	2	207	126	53607	http://www.ebi.ac.uk/QuickGO/GTerm?id=GO:1900006	[]
6	6	response to monosaccharide	GO:0034284	0.0857	0.201	0	0	0	0	Ep300|1;Ppp3ca|1;Vsnl1|1	3	440	126	53607	http://www.ebi.ac.uk/QuickGO/GTerm?id=GO:0034284	[]
5	5	regulation of response to extracellular stimulus	GO:0032104	0.0857	0.201	0	0	0	0	Anxa5|1;Pdk1|1;Mdh1|1	3	440	126	53607	http://www.ebi.ac.uk/QuickGO/GTerm?id=GO:0032104	[]
6	6	regulation of response to nutrient levels	GO:0032107	0.0857	0.201	0	0	0	0	Anxa5|1;Pdk1|1;Mdh1|1	3	440	126	53607	http://www.ebi.ac.uk/QuickGO/GTerm?id=GO:0032107	[]
5	5	metanephros development	GO:0001656	0.0864	0.203	0	0	0	0	Acat1|1;Calb1|1	2	208	126	53607	http://www.ebi.ac.uk/QuickGO/GTerm?id=GO:0001656	[]
5	5	hydrogen peroxide catabolic process	GO:0042744	0.0877	0.205	0	0	0	0	Prdx3|1	1	39	126	53607	http://www.ebi.ac.uk/QuickGO/GTerm?id=GO:0042744	[]
5	5	copulation	GO:0007620	0.0877	0.205	0	0	0	0	Abat|1	1	39	126	53607	http://www.ebi.ac.uk/QuickGO/GTerm?id=GO:0007620	[]
4	4	regulation of development, heterochronic	GO:0040034	0.0877	0.205	0	0	0	0	Hmgn2|1	1	39	126	53607	http://www.ebi.ac.uk/QuickGO/GTerm?id=GO:0040034	[]
8	6,7,8	negative regulation of dendrite morphogenesis	GO:0050774	0.0877	0.205	0	0	0	0	Ppp3ca|1	1	39	126	53607	http://www.ebi.ac.uk/QuickGO/GTerm?id=GO:0050774	[]
8	7,8	positive regulation of lamellipodium assembly	GO:0010592	0.0877	0.205	0	0	0	0	Rac1|1	1	39	126	53607	http://www.ebi.ac.uk/QuickGO/GTerm?id=GO:0010592	[]
5	5	negative regulation of lipid catabolic process	GO:0050995	0.0877	0.205	0	0	0	0	Dbi|1	1	39	126	53607	http://www.ebi.ac.uk/QuickGO/GTerm?id=GO:0050995	[]
6	4,5,6	cell redox homeostasis	GO:0045454	0.0878	0.205	0	0	0	0	Prdx3|1;Dld|1	2	210	126	53607	http://www.ebi.ac.uk/QuickGO/GTerm?id=GO:0045454	[]
6	5,6	actin cytoskeleton organization	GO:0030036	0.0887	0.207	0	0	0	0	Ep300|1;Spta1|1;Cyfip1|1;Rock2|1;Sptbn1|1;Rac1|1;Epb41l3|1;Calr|1	8	1946	126	53607	http://www.ebi.ac.uk/QuickGO/GTerm?id=GO:0030036	[]
6	6	positive regulation of autophagy	GO:0010508	0.0893	0.208	0	0	0	0	Anxa5|1;Pdk1|1;Mdh1|1	3	448	126	53607	http://www.ebi.ac.uk/QuickGO/GTerm?id=GO:0010508	[]
8	8	positive regulation of phosphoprotein phosphatase activity	GO:0032516	0.0899	0.209	0	0	0	0	Hsp90ab1|1	1	40	126	53607	http://www.ebi.ac.uk/QuickGO/GTerm?id=GO:0032516	[]
7	6,7	tetrahydrofolate metabolic process	GO:0046653	0.0899	0.209	0	0	0	0	Aldh1l1|1	1	40	126	53607	http://www.ebi.ac.uk/QuickGO/GTerm?id=GO:0046653	[]
8	4,5,7,8	negative regulation of gene silencing	GO:0060969	0.0899	0.209	0	0	0	0	Ppp3ca|1	1	40	126	53607	http://www.ebi.ac.uk/QuickGO/GTerm?id=GO:0060969	[]
12	7,8,9,11,12	positive regulation of actin nucleation	GO:0051127	0.0899	0.209	0	0	0	0	Cyfip1|1	1	40	126	53607	http://www.ebi.ac.uk/QuickGO/GTerm?id=GO:0051127	[]
6	6	cell-cell junction assembly	GO:0007043	0.0899	0.209	0	0	0	0	Rock2|1;Epb41l3|1	2	213	126	53607	http://www.ebi.ac.uk/QuickGO/GTerm?id=GO:0007043	[]
4	4	kidney development	GO:0001822	0.0901	0.209	0	0	0	0	Acat1|1;Basp1|1;Ass1|1;Calb1|1	4	719	126	53607	http://www.ebi.ac.uk/QuickGO/GTerm?id=GO:0001822	[]
7	7	inorganic ion homeostasis	GO:0098771	0.0902	0.209	0	0	0	0	Dbi|1;Immt|1;Atp2b1|1;Ywhae|1;Atp6v0a1|1;Anxa6|1;Calb1|1	7	1629	126	53607	http://www.ebi.ac.uk/QuickGO/GTerm?id=GO:0098771	[]
7	6,7	retrograde transport, endosome to Golgi	GO:0042147	0.0906	0.21	0	0	0	0	Cltc|1;Ube2o|1	2	214	126	53607	http://www.ebi.ac.uk/QuickGO/GTerm?id=GO:0042147	[]
4	4	positive regulation of cell communication	GO:0010647	0.0911	0.211	0	0	0	0	Dbi|1;Cyfip1|1;Rock2|1;Ube2o|1;Ppp3ca|1;Glud1|1;Abat|1;Anxa5|1;Pdk1|1;Hsp90ab1|1;Calb1|1;Vsnl1|1;Mdh1|1;Calr|1	14	4027	126	53607	http://www.ebi.ac.uk/QuickGO/GTerm?id=GO:0010647	[]
5	5	protein-DNA complex subunit organization	GO:0071824	0.0911	0.211	0	0	0	0	Ep300|1;H3f3c|1;H2afy2|1	3	452	126	53607	http://www.ebi.ac.uk/QuickGO/GTerm?id=GO:0071824	[]
5	5	lamellipodium organization	GO:0097581	0.0913	0.211	0	0	0	0	Cyfip1|1;Rac1|1	2	215	126	53607	http://www.ebi.ac.uk/QuickGO/GTerm?id=GO:0097581	[]
9	7,9	regulation of neuron differentiation	GO:0045664	0.0917	0.211	0	0	0	0	Ep300|1;Ywhag|1;Negr1|1;Cyfip1|1;Ppp3ca|1;Rac1|1;Calr|1	7	1636	126	53607	http://www.ebi.ac.uk/QuickGO/GTerm?id=GO:0045664	[]
5	4,5	regulation of protein complex assembly	GO:0043254	0.0919	0.211	0	0	0	0	Ep300|1;Spta1|1;Cyfip1|1;Sptbn1|1;Rac1|1	5	1015	126	53607	http://www.ebi.ac.uk/QuickGO/GTerm?id=GO:0043254	[]
7	5,7	myelin assembly	GO:0032288	0.092	0.211	0	0	0	0	Epb41l3|1	1	41	126	53607	http://www.ebi.ac.uk/QuickGO/GTerm?id=GO:0032288	[]
5	5	cellular response to fluid shear stress	GO:0071498	0.092	0.211	0	0	0	0	Ass1|1	1	41	126	53607	http://www.ebi.ac.uk/QuickGO/GTerm?id=GO:0071498	[]
7	7	trivalent inorganic cation transport	GO:0072512	0.092	0.211	0	0	0	0	Cltc|1	1	41	126	53607	http://www.ebi.ac.uk/QuickGO/GTerm?id=GO:0072512	[]
10	8,10	ferric iron transport	GO:0015682	0.092	0.211	0	0	0	0	Cltc|1	1	41	126	53607	http://www.ebi.ac.uk/QuickGO/GTerm?id=GO:0015682	[]
6	5,6	regulation of sulfur metabolic process	GO:0042762	0.092	0.211	0	0	0	0	Pdk1|1	1	41	126	53607	http://www.ebi.ac.uk/QuickGO/GTerm?id=GO:0042762	[]
7	6,7	central nervous system neuron development	GO:0021954	0.0921	0.211	0	0	0	0	Hsp90ab1|1;Rac1|1	2	216	126	53607	http://www.ebi.ac.uk/QuickGO/GTerm?id=GO:0021954	[]
7	5,6,7	positive regulation of reactive oxygen species metabolic process	GO:2000379	0.0928	0.213	0	0	0	0	Hsp90ab1|1;Ass1|1	2	217	126	53607	http://www.ebi.ac.uk/QuickGO/GTerm?id=GO:2000379	[]
6	5,6	organic acid transport	GO:0015849	0.0929	0.213	0	0	0	0	Got2|1;Abat|1;Slc1a2|1;Slc32a1|1	4	727	126	53607	http://www.ebi.ac.uk/QuickGO/GTerm?id=GO:0015849	[]
5	5	epidermis development	GO:0008544	0.0936	0.214	0	0	0	0	Dbi|1;Rock2|1;H2afy2|1;Rac1|1	4	729	126	53607	http://www.ebi.ac.uk/QuickGO/GTerm?id=GO:0008544	[]
4	3,4	regulation of multi-organism process	GO:0043900	0.094	0.214	0	0	0	0	Pabpc1|1;Ep300|1;Anxa5|1;Mdh1|1;Calr|1	5	1022	126	53607	http://www.ebi.ac.uk/QuickGO/GTerm?id=GO:0043900	[]
8	8	peptidyl-serine modification	GO:0018209	0.094	0.214	0	0	0	0	Rock2|1;Pdk1|1;Top1|1;Hsp90ab1|1	4	730	126	53607	http://www.ebi.ac.uk/QuickGO/GTerm?id=GO:0018209	[]
7	7	glucan catabolic process	GO:0009251	0.0941	0.214	0	0	0	0	Pygb|1	1	42	126	53607	http://www.ebi.ac.uk/QuickGO/GTerm?id=GO:0009251	[]
5	5	Golgi localization	GO:0051645	0.0941	0.214	0	0	0	0	Ywhaz|1	1	42	126	53607	http://www.ebi.ac.uk/QuickGO/GTerm?id=GO:0051645	[]
11	7,8,9,10,11	positive regulation of mRNA 3'-end processing	GO:0031442	0.0941	0.214	0	0	0	0	Pabpc1|1	1	42	126	53607	http://www.ebi.ac.uk/QuickGO/GTerm?id=GO:0031442	[]
6	6	glycogen catabolic process	GO:0005980	0.0941	0.214	0	0	0	0	Pygb|1	1	42	126	53607	http://www.ebi.ac.uk/QuickGO/GTerm?id=GO:0005980	[]
6	6	response to lithium ion	GO:0010226	0.0941	0.214	0	0	0	0	Calr|1	1	42	126	53607	http://www.ebi.ac.uk/QuickGO/GTerm?id=GO:0010226	[]
7	7	glycosylceramide metabolic process	GO:0006677	0.0941	0.214	0	0	0	0	Aldh5a1|1	1	42	126	53607	http://www.ebi.ac.uk/QuickGO/GTerm?id=GO:0006677	[]
4	4	receptor internalization	GO:0031623	0.0942	0.214	0	0	0	0	Cltc|1;Sh3gl2|1	2	219	126	53607	http://www.ebi.ac.uk/QuickGO/GTerm?id=GO:0031623	[]
7	5,7	response to molecule of bacterial origin	GO:0002237	0.0951	0.216	0	0	0	0	Prdx3|1;Cnp|1;Ass1|1;Hspd1|1	4	733	126	53607	http://www.ebi.ac.uk/QuickGO/GTerm?id=GO:0002237	[]
7	7	negative regulation of nucleic acid-templated transcription	GO:1903507	0.0958	0.217	0	0	0	0	Ywhaq|1;Cbx1|1;H2afz|1;Ep300|1;H2afj|1;Hmgn2|1;Hnrnpa2b1|1;Eno1|1;H2afy2|1;Pura|1;Basp1|1;Calr|1	12	3350	126	53607	http://www.ebi.ac.uk/QuickGO/GTerm?id=GO:1903507	[]
8	7,8	protein polymerization	GO:0051258	0.0961	0.217	0	0	0	0	Spta1|1;Cyfip1|1;Sptbn1|1;Rac1|1	4	736	126	53607	http://www.ebi.ac.uk/QuickGO/GTerm?id=GO:0051258	[]
8	8	protein localization to chromatin	GO:0071168	0.0963	0.217	0	0	0	0	H2afy2|1	1	43	126	53607	http://www.ebi.ac.uk/QuickGO/GTerm?id=GO:0071168	[]
6	6	amine catabolic process	GO:0009310	0.0963	0.217	0	0	0	0	Sat2|1	1	43	126	53607	http://www.ebi.ac.uk/QuickGO/GTerm?id=GO:0009310	[]
7	7	arginine metabolic process	GO:0006525	0.0963	0.217	0	0	0	0	Ass1|1	1	43	126	53607	http://www.ebi.ac.uk/QuickGO/GTerm?id=GO:0006525	[]
6	6	Golgi inheritance	GO:0048313	0.0963	0.217	0	0	0	0	Ywhaz|1	1	43	126	53607	http://www.ebi.ac.uk/QuickGO/GTerm?id=GO:0048313	[]
8	6,8	positive regulation of neutrophil chemotaxis	GO:0090023	0.0963	0.217	0	0	0	0	Rac1|1	1	43	126	53607	http://www.ebi.ac.uk/QuickGO/GTerm?id=GO:0090023	[]
6	6	response to angiotensin	GO:1990776	0.0963	0.217	0	0	0	0	Rock2|1	1	43	126	53607	http://www.ebi.ac.uk/QuickGO/GTerm?id=GO:1990776	[]
8	6,7,8	regulation of platelet aggregation	GO:0090330	0.0963	0.217	0	0	0	0	Abat|1	1	43	126	53607	http://www.ebi.ac.uk/QuickGO/GTerm?id=GO:0090330	[]
10	8,9,10	nuclear-transcribed mRNA poly(A) tail shortening	GO:0000289	0.0963	0.217	0	0	0	0	Pabpc1|1	1	43	126	53607	http://www.ebi.ac.uk/QuickGO/GTerm?id=GO:0000289	[]
6	5,6	NIK/NF-kappaB signaling	GO:0038061	0.0964	0.217	0	0	0	0	Ndufc2|1;Calr|1	2	222	126	53607	http://www.ebi.ac.uk/QuickGO/GTerm?id=GO:0038061	[]
5	5	response to cAMP	GO:0051591	0.0971	0.218	0	0	0	0	Ep300|1;Ass1|1	2	223	126	53607	http://www.ebi.ac.uk/QuickGO/GTerm?id=GO:0051591	[]
5	4,5	substrate adhesion-dependent cell spreading	GO:0034446	0.0971	0.218	0	0	0	0	Rac1|1;Calr|1	2	223	126	53607	http://www.ebi.ac.uk/QuickGO/GTerm?id=GO:0034446	[]
8	6,8	nucleosome assembly	GO:0006334	0.0979	0.22	0	0	0	0	H3f3c|1;H2afy2|1	2	224	126	53607	http://www.ebi.ac.uk/QuickGO/GTerm?id=GO:0006334	[]
5	5	organonitrogen compound catabolic process	GO:1901565	0.0979	0.22	0	0	0	0	Lypla1|1;Aldh5a1|1;Aldh1l1|1;Glud1|1;Got2|1;Mccc1|1;Acat1|1;Sat2|1;Hsp90ab1|1	9	2326	126	53607	http://www.ebi.ac.uk/QuickGO/GTerm?id=GO:1901565	[]
7	4,6,7	negative regulation of establishment of protein localization to plasma membrane	GO:0090005	0.0984	0.22	0	0	0	0	Lypla1|1	1	44	126	53607	http://www.ebi.ac.uk/QuickGO/GTerm?id=GO:0090005	[]
9	5,7,8,9	positive regulation of amino acid transport	GO:0051957	0.0984	0.22	0	0	0	0	Abat|1	1	44	126	53607	http://www.ebi.ac.uk/QuickGO/GTerm?id=GO:0051957	[]
5	5	lactate metabolic process	GO:0006089	0.0984	0.22	0	0	0	0	Ldha|1	1	44	126	53607	http://www.ebi.ac.uk/QuickGO/GTerm?id=GO:0006089	[]
5	4,5	lateral ventricle development	GO:0021670	0.0984	0.22	0	0	0	0	Dbi|1	1	44	126	53607	http://www.ebi.ac.uk/QuickGO/GTerm?id=GO:0021670	[]
6	6	inhibitory postsynaptic potential	GO:0060080	0.0984	0.22	0	0	0	0	Abat|1	1	44	126	53607	http://www.ebi.ac.uk/QuickGO/GTerm?id=GO:0060080	[]
7	7	negative regulation of dephosphorylation	GO:0035305	0.0986	0.22	0	0	0	0	Rock2|1;Ywhae|1	2	225	126	53607	http://www.ebi.ac.uk/QuickGO/GTerm?id=GO:0035305	[]
6	6	epidermal cell differentiation	GO:0009913	0.099	0.221	0	0	0	0	Rock2|1;H2afy2|1;Rac1|1	3	469	126	53607	http://www.ebi.ac.uk/QuickGO/GTerm?id=GO:0009913	[]
7	7	cardiac muscle hypertrophy	GO:0003300	0.0993	0.222	0	0	0	0	Rock2|1;Ppp3ca|1	2	226	126	53607	http://www.ebi.ac.uk/QuickGO/GTerm?id=GO:0003300	[]
6	6	regulation of autophagy	GO:0010506	0.0997	0.222	0	0	0	0	Anxa5|1;Pdk1|1;Atp6v0a1|1;Mdh1|1	4	746	126	53607	http://www.ebi.ac.uk/QuickGO/GTerm?id=GO:0010506	[]
9	9	negative regulation of cysteine-type endopeptidase activity	GO:2000117	0.1	0.222	0	0	0	0	Ep300|1;Prdx3|1	2	227	126	53607	http://www.ebi.ac.uk/QuickGO/GTerm?id=GO:2000117	[]
5	5	macromolecular complex disassembly	GO:0032984	0.1	0.222	0	0	0	0	Spta1|1;Sptbn1|1;Sh3gl2|1	3	472	126	53607	http://www.ebi.ac.uk/QuickGO/GTerm?id=GO:0032984	[]
7	6,7	positive regulation of granulocyte chemotaxis	GO:0071624	0.101	0.222	0	0	0	0	Rac1|1	1	45	126	53607	http://www.ebi.ac.uk/QuickGO/GTerm?id=GO:0071624	[]
5	5	organelle inheritance	GO:0048308	0.101	0.222	0	0	0	0	Ywhaz|1	1	45	126	53607	http://www.ebi.ac.uk/QuickGO/GTerm?id=GO:0048308	[]
6	6	cellular polysaccharide catabolic process	GO:0044247	0.101	0.222	0	0	0	0	Pygb|1	1	45	126	53607	http://www.ebi.ac.uk/QuickGO/GTerm?id=GO:0044247	[]
6	6	lipoprotein catabolic process	GO:0042159	0.101	0.222	0	0	0	0	Lypla1|1	1	45	126	53607	http://www.ebi.ac.uk/QuickGO/GTerm?id=GO:0042159	[]
9	6,7,8,9	regulation of type I interferon-mediated signaling pathway	GO:0060338	0.101	0.222	0	0	0	0	Hsp90ab1|1	1	45	126	53607	http://www.ebi.ac.uk/QuickGO/GTerm?id=GO:0060338	[]
6	6	azole transport	GO:0045117	0.101	0.222	0	0	0	0	Ywhaz|1	1	45	126	53607	http://www.ebi.ac.uk/QuickGO/GTerm?id=GO:0045117	[]
5	5	alditol phosphate metabolic process	GO:0052646	0.101	0.222	0	0	0	0	Gpd2|1	1	45	126	53607	http://www.ebi.ac.uk/QuickGO/GTerm?id=GO:0052646	[]
7	6,7	positive regulation of gene expression, epigenetic	GO:0045815	0.101	0.222	0	0	0	0	Ep300|1	1	45	126	53607	http://www.ebi.ac.uk/QuickGO/GTerm?id=GO:0045815	[]
4	4	anatomical structure arrangement	GO:0048532	0.101	0.222	0	0	0	0	Rac1|1	1	45	126	53607	http://www.ebi.ac.uk/QuickGO/GTerm?id=GO:0048532	[]
9	6,7,9	negative regulation of protein depolymerization	GO:1901880	0.101	0.222	0	0	0	0	Spta1|1;Sptbn1|1	2	228	126	53607	http://www.ebi.ac.uk/QuickGO/GTerm?id=GO:1901880	[]
7	5,6,7	positive regulation of transmembrane receptor protein serine/threonine kinase signaling pathway	GO:0090100	0.101	0.222	0	0	0	0	Ube2o|1;Hsp90ab1|1	2	228	126	53607	http://www.ebi.ac.uk/QuickGO/GTerm?id=GO:0090100	[]
3	3	positive regulation of behavior	GO:0048520	0.101	0.222	0	0	0	0	Rac1|1;Calr|1	2	228	126	53607	http://www.ebi.ac.uk/QuickGO/GTerm?id=GO:0048520	[]
5	5	autophagy	GO:0006914	0.101	0.222	0	0	0	0	Cltc|1;Anxa5|1;Pdk1|1;Atp6v0a1|1;Mdh1|1	5	1045	126	53607	http://www.ebi.ac.uk/QuickGO/GTerm?id=GO:0006914	[]
5	4,5	pallium development	GO:0021543	0.101	0.222	0	0	0	0	Ywhae|1;Rac1|1;Slc32a1|1	3	473	126	53607	http://www.ebi.ac.uk/QuickGO/GTerm?id=GO:0021543	[]
6	6	polyol metabolic process	GO:0019751	0.102	0.223	0	0	0	0	Gpd2|1;Tpi1|1	2	229	126	53607	http://www.ebi.ac.uk/QuickGO/GTerm?id=GO:0019751	[]
8	7,8	inorganic anion transmembrane transport	GO:0098661	0.102	0.223	0	0	0	0	Slc25a3|1;Slc12a2|1	2	229	126	53607	http://www.ebi.ac.uk/QuickGO/GTerm?id=GO:0098661	[]
7	7	post-Golgi vesicle-mediated transport	GO:0006892	0.102	0.223	0	0	0	0	Lypla1|1;Sptbn1|1	2	229	126	53607	http://www.ebi.ac.uk/QuickGO/GTerm?id=GO:0006892	[]
6	5,6	regulation of extracellular matrix organization	GO:1903053	0.102	0.223	0	0	0	0	Spta1|1;Cyfip1|1;Sptbn1|1;Rac1|1	4	751	126	53607	http://www.ebi.ac.uk/QuickGO/GTerm?id=GO:1903053	[]
9	5,6,8,9	positive regulation of exocytosis	GO:0045921	0.102	0.223	0	0	0	0	Sept5|1;Vsnl1|1	2	230	126	53607	http://www.ebi.ac.uk/QuickGO/GTerm?id=GO:0045921	[]
6	6	nephron tubule development	GO:0072080	0.102	0.223	0	0	0	0	Acat1|1;Calb1|1	2	230	126	53607	http://www.ebi.ac.uk/QuickGO/GTerm?id=GO:0072080	[]
8	6,8	regulation of neurogenesis	GO:0050767	0.103	0.223	0	0	0	0	Ep300|1;Ywhag|1;Negr1|1;Cyfip1|1;Idh2|1;Ppp3ca|1;Rac1|1;Calr|1	8	2013	126	53607	http://www.ebi.ac.uk/QuickGO/GTerm?id=GO:0050767	[]
6	5,6	cellular response to antibiotic	GO:0071236	0.103	0.223	0	0	0	0	Ep300|1	1	46	126	53607	http://www.ebi.ac.uk/QuickGO/GTerm?id=GO:0071236	[]
7	6,7	regulation of cellular respiration	GO:0043457	0.103	0.223	0	0	0	0	Cisd1|1	1	46	126	53607	http://www.ebi.ac.uk/QuickGO/GTerm?id=GO:0043457	[]
6	6	positive regulation by host of viral transcription	GO:0043923	0.103	0.223	0	0	0	0	Ep300|1	1	46	126	53607	http://www.ebi.ac.uk/QuickGO/GTerm?id=GO:0043923	[]
6	6	cellular response to vitamin	GO:0071295	0.103	0.223	0	0	0	0	Atp2b1|1	1	46	126	53607	http://www.ebi.ac.uk/QuickGO/GTerm?id=GO:0071295	[]
4	4	retina layer formation	GO:0010842	0.103	0.223	0	0	0	0	Calb1|1	1	46	126	53607	http://www.ebi.ac.uk/QuickGO/GTerm?id=GO:0010842	[]
8	5,8	detection of mechanical stimulus involved in sensory perception of sound	GO:0050910	0.103	0.223	0	0	0	0	Slc12a2|1	1	46	126	53607	http://www.ebi.ac.uk/QuickGO/GTerm?id=GO:0050910	[]
8	4,6,7,8	negative regulation of organic acid transport	GO:0032891	0.103	0.223	0	0	0	0	Abat|1	1	46	126	53607	http://www.ebi.ac.uk/QuickGO/GTerm?id=GO:0032891	[]
8	6,7,8	regulation of beta-amyloid formation	GO:1902003	0.103	0.223	0	0	0	0	Rock2|1	1	46	126	53607	http://www.ebi.ac.uk/QuickGO/GTerm?id=GO:1902003	[]
7	5,6,7	positive regulation of epidermal cell differentiation	GO:0045606	0.103	0.223	0	0	0	0	H2afy2|1	1	46	126	53607	http://www.ebi.ac.uk/QuickGO/GTerm?id=GO:0045606	[]
13	12,13	vacuolar acidification	GO:0007035	0.103	0.223	0	0	0	0	Atp6v0a1|1	1	46	126	53607	http://www.ebi.ac.uk/QuickGO/GTerm?id=GO:0007035	[]
6	6	fibril organization	GO:0097435	0.103	0.223	0	0	0	0	Ep300|1;Spta1|1;Cyfip1|1;Sptbn1|1;Hsp90ab1|1;Rac1|1	6	1362	126	53607	http://www.ebi.ac.uk/QuickGO/GTerm?id=GO:0097435	[]
7	7	gliogenesis	GO:0042063	0.103	0.223	0	0	0	0	Dbi|1;Idh2|1;Eef2|1;Cnp|1	4	754	126	53607	http://www.ebi.ac.uk/QuickGO/GTerm?id=GO:0042063	[]
4	4	tube development	GO:0035295	0.103	0.223	0	0	0	0	Ep300|1;Rock2|1;Ptges3|1;Acat1|1;Ass1|1;Slc12a2|1;Calb1|1	7	1684	126	53607	http://www.ebi.ac.uk/QuickGO/GTerm?id=GO:0035295	[]
6	6	negative regulation of RNA biosynthetic process	GO:1902679	0.103	0.223	0	0	0	0	Ywhaq|1;Cbx1|1;H2afz|1;Ep300|1;H2afj|1;Hmgn2|1;Hnrnpa2b1|1;Eno1|1;H2afy2|1;Pura|1;Basp1|1;Calr|1	12	3393	126	53607	http://www.ebi.ac.uk/QuickGO/GTerm?id=GO:1902679	[]
6	6	striated muscle hypertrophy	GO:0014897	0.103	0.223	0	0	0	0	Rock2|1;Ppp3ca|1	2	231	126	53607	http://www.ebi.ac.uk/QuickGO/GTerm?id=GO:0014897	[]
6	5,6	energy reserve metabolic process	GO:0006112	0.104	0.225	0	0	0	0	Ptges3|1;Pygb|1	2	232	126	53607	http://www.ebi.ac.uk/QuickGO/GTerm?id=GO:0006112	[]
8	4,7,8	platelet formation	GO:0030220	0.105	0.226	0	0	0	0	Ep300|1	1	47	126	53607	http://www.ebi.ac.uk/QuickGO/GTerm?id=GO:0030220	[]
9	8,9	negative regulation of phosphoprotein phosphatase activity	GO:0032515	0.105	0.226	0	0	0	0	Rock2|1	1	47	126	53607	http://www.ebi.ac.uk/QuickGO/GTerm?id=GO:0032515	[]
7	6,7	myelin maintenance	GO:0043217	0.105	0.226	0	0	0	0	Epb41l3|1	1	47	126	53607	http://www.ebi.ac.uk/QuickGO/GTerm?id=GO:0043217	[]
9	7,8,9	regulation of mitochondrial translation	GO:0070129	0.105	0.226	0	0	0	0	Lrpprc|1	1	47	126	53607	http://www.ebi.ac.uk/QuickGO/GTerm?id=GO:0070129	[]
6	6	protein-lipid complex assembly	GO:0065005	0.105	0.226	0	0	0	0	Sh3gl2|1	1	47	126	53607	http://www.ebi.ac.uk/QuickGO/GTerm?id=GO:0065005	[]
8	7,8	viral RNA genome replication	GO:0039694	0.105	0.226	0	0	0	0	Rock2|1	1	47	126	53607	http://www.ebi.ac.uk/QuickGO/GTerm?id=GO:0039694	[]
8	7,8	miRNA metabolic process	GO:0010586	0.105	0.226	0	0	0	0	Ep300|1	1	47	126	53607	http://www.ebi.ac.uk/QuickGO/GTerm?id=GO:0010586	[]
7	6,7	negative regulation of NIK/NF-kappaB signaling	GO:1901223	0.105	0.226	0	0	0	0	Ndufc2|1	1	47	126	53607	http://www.ebi.ac.uk/QuickGO/GTerm?id=GO:1901223	[]
6	6	negative regulation of cellular macromolecule biosynthetic process	GO:2000113	0.105	0.226	0	0	0	0	Ywhaq|1;Cbx1|1;H2afz|1;Ep300|1;H2afj|1;Hmgn2|1;Hnrnpa2b1|1;Ppp3ca|1;Eno1|1;H2afy2|1;Pura|1;Basp1|1;Calr|1	13	3764	126	53607	http://www.ebi.ac.uk/QuickGO/GTerm?id=GO:2000113	[]
5	5	response to carbohydrate	GO:0009743	0.105	0.226	0	0	0	0	Ep300|1;Ppp3ca|1;Vsnl1|1	3	482	126	53607	http://www.ebi.ac.uk/QuickGO/GTerm?id=GO:0009743	[]
6	5,6	organelle disassembly	GO:1903008	0.105	0.226	0	0	0	0	Anxa5|1;Pdk1|1;Mdh1|1	3	482	126	53607	http://www.ebi.ac.uk/QuickGO/GTerm?id=GO:1903008	[]
5	5	cell junction assembly	GO:0034329	0.106	0.227	0	0	0	0	Rock2|1;Rac1|1;Epb41l3|1	3	483	126	53607	http://www.ebi.ac.uk/QuickGO/GTerm?id=GO:0034329	[]
8	5,6,8	negative regulation of protein complex disassembly	GO:0043242	0.106	0.227	0	0	0	0	Spta1|1;Sptbn1|1	2	235	126	53607	http://www.ebi.ac.uk/QuickGO/GTerm?id=GO:0043242	[]
5	5	muscle hypertrophy	GO:0014896	0.106	0.227	0	0	0	0	Rock2|1;Ppp3ca|1	2	235	126	53607	http://www.ebi.ac.uk/QuickGO/GTerm?id=GO:0014896	[]
7	7	cellular response to insulin stimulus	GO:0032869	0.107	0.228	0	0	0	0	H2afz|1;Ywhag|1;Cyfip1|1	3	485	126	53607	http://www.ebi.ac.uk/QuickGO/GTerm?id=GO:0032869	[]
7	6,7	platelet morphogenesis	GO:0036344	0.107	0.228	0	0	0	0	Ep300|1	1	48	126	53607	http://www.ebi.ac.uk/QuickGO/GTerm?id=GO:0036344	[]
6	6	polysaccharide catabolic process	GO:0000272	0.107	0.228	0	0	0	0	Pygb|1	1	48	126	53607	http://www.ebi.ac.uk/QuickGO/GTerm?id=GO:0000272	[]
9	8,9	nicotinamide nucleotide biosynthetic process	GO:0019359	0.107	0.228	0	0	0	0	Idh2|1	1	48	126	53607	http://www.ebi.ac.uk/QuickGO/GTerm?id=GO:0019359	[]
7	6,7	heat generation	GO:0031649	0.107	0.228	0	0	0	0	Abat|1	1	48	126	53607	http://www.ebi.ac.uk/QuickGO/GTerm?id=GO:0031649	[]
9	5,7,8,9	regulation of translation in response to stress	GO:0043555	0.107	0.228	0	0	0	0	Hbb-b1|1	1	48	126	53607	http://www.ebi.ac.uk/QuickGO/GTerm?id=GO:0043555	[]
5	5	response to misfolded protein	GO:0051788	0.107	0.228	0	0	0	0	Hspd1|1	1	48	126	53607	http://www.ebi.ac.uk/QuickGO/GTerm?id=GO:0051788	[]
6	5,6	cellular polysaccharide metabolic process	GO:0044264	0.107	0.229	0	0	0	0	Ptges3|1;Pygb|1	2	237	126	53607	http://www.ebi.ac.uk/QuickGO/GTerm?id=GO:0044264	[]
7	5,6,7	body fluid secretion	GO:0007589	0.107	0.229	0	0	0	0	Got2|1;Copa|1	2	237	126	53607	http://www.ebi.ac.uk/QuickGO/GTerm?id=GO:0007589	[]
7	5,7	regulation of axon extension	GO:0030516	0.108	0.23	0	0	0	0	Ep300|1;Cyfip1|1	2	238	126	53607	http://www.ebi.ac.uk/QuickGO/GTerm?id=GO:0030516	[]
7	6,7	positive regulation of interleukin-6 secretion	GO:2000778	0.109	0.231	0	0	0	0	Hspd1|1	1	49	126	53607	http://www.ebi.ac.uk/QuickGO/GTerm?id=GO:2000778	[]
5	5	regulation of response to tumor cell	GO:0002834	0.109	0.231	0	0	0	0	Hspd1|1	1	49	126	53607	http://www.ebi.ac.uk/QuickGO/GTerm?id=GO:0002834	[]
8	8	phosphate ion transport	GO:0006817	0.109	0.231	0	0	0	0	Slc25a3|1	1	49	126	53607	http://www.ebi.ac.uk/QuickGO/GTerm?id=GO:0006817	[]
8	7,8	pyridine nucleotide biosynthetic process	GO:0019363	0.109	0.231	0	0	0	0	Idh2|1	1	49	126	53607	http://www.ebi.ac.uk/QuickGO/GTerm?id=GO:0019363	[]
7	7	hexose catabolic process	GO:0019320	0.109	0.231	0	0	0	0	Ldha|1	1	49	126	53607	http://www.ebi.ac.uk/QuickGO/GTerm?id=GO:0019320	[]
6	5,6	regulation of immune response to tumor cell	GO:0002837	0.109	0.231	0	0	0	0	Hspd1|1	1	49	126	53607	http://www.ebi.ac.uk/QuickGO/GTerm?id=GO:0002837	[]
5	5	regulation of leukocyte chemotaxis	GO:0002688	0.109	0.231	0	0	0	0	Rac1|1;Calr|1	2	239	126	53607	http://www.ebi.ac.uk/QuickGO/GTerm?id=GO:0002688	[]
5	5	response to dsRNA	GO:0043331	0.109	0.231	0	0	0	0	Hnrnpa2b1|1;Ppp3ca|1	2	239	126	53607	http://www.ebi.ac.uk/QuickGO/GTerm?id=GO:0043331	[]
6	5,6	regulation of transmembrane receptor protein serine/threonine kinase signaling pathway	GO:0090092	0.111	0.234	0	0	0	0	Ube2o|1;Sptbn1|1;Hsp90ab1|1	3	493	126	53607	http://www.ebi.ac.uk/QuickGO/GTerm?id=GO:0090092	[]
9	6,8,9	dopamine secretion	GO:0014046	0.111	0.234	0	0	0	0	Abat|1	1	50	126	53607	http://www.ebi.ac.uk/QuickGO/GTerm?id=GO:0014046	[]
6	4,6	ovulation	GO:0030728	0.111	0.234	0	0	0	0	Afp|1	1	50	126	53607	http://www.ebi.ac.uk/QuickGO/GTerm?id=GO:0030728	[]
6	6	hematopoietic stem cell differentiation	GO:0060218	0.111	0.234	0	0	0	0	Hspa9|1	1	50	126	53607	http://www.ebi.ac.uk/QuickGO/GTerm?id=GO:0060218	[]
6	4,6	negative regulation of amine transport	GO:0051953	0.111	0.234	0	0	0	0	Abat|1	1	50	126	53607	http://www.ebi.ac.uk/QuickGO/GTerm?id=GO:0051953	[]
10	6,7,9,10	regulation of dopamine secretion	GO:0014059	0.111	0.234	0	0	0	0	Abat|1	1	50	126	53607	http://www.ebi.ac.uk/QuickGO/GTerm?id=GO:0014059	[]
9	7,8,9	regulation of cysteine-type endopeptidase activity involved in apoptotic process	GO:0043281	0.111	0.234	0	0	0	0	Ep300|1;Prdx3|1;Hspd1|1	3	494	126	53607	http://www.ebi.ac.uk/QuickGO/GTerm?id=GO:0043281	[]
5	5	renal system development	GO:0072001	0.111	0.234	0	0	0	0	Acat1|1;Basp1|1;Ass1|1;Calb1|1	4	777	126	53607	http://www.ebi.ac.uk/QuickGO/GTerm?id=GO:0072001	[]
7	6,7	transmembrane receptor protein serine/threonine kinase signaling pathway	GO:0007178	0.111	0.234	0	0	0	0	Afp|1;Ube2o|1;Sptbn1|1;Hsp90ab1|1	4	777	126	53607	http://www.ebi.ac.uk/QuickGO/GTerm?id=GO:0007178	[]
6	4,6	chromatin organization	GO:0006325	0.112	0.234	0	0	0	0	H2afz|1;Ep300|1;H2afj|1;Tfam|1;H3f3c|1;Jade3|1;H2afy2|1;Top1|1	8	2054	126	53607	http://www.ebi.ac.uk/QuickGO/GTerm?id=GO:0006325	[]
6	4,6	regulation of epithelial cell migration	GO:0010632	0.112	0.234	0	0	0	0	Rock2|1;Atp5a1|1;Calr|1	3	495	126	53607	http://www.ebi.ac.uk/QuickGO/GTerm?id=GO:0010632	[]
6	5,6	renal tubule development	GO:0061326	0.112	0.235	0	0	0	0	Acat1|1;Calb1|1	2	243	126	53607	http://www.ebi.ac.uk/QuickGO/GTerm?id=GO:0061326	[]
6	6	anion transport	GO:0006820	0.112	0.235	0	0	0	0	Slc25a3|1;Got2|1;Abat|1;Slc1a2|1;Slc12a2|1;Slc32a1|1	6	1397	126	53607	http://www.ebi.ac.uk/QuickGO/GTerm?id=GO:0006820	[]
7	7	skeletal muscle tissue development	GO:0007519	0.113	0.236	0	0	0	0	Ep300|1;Ppp3ca|1;Eef2|1	3	497	126	53607	http://www.ebi.ac.uk/QuickGO/GTerm?id=GO:0007519	[]
5	5	benzene-containing compound metabolic process	GO:0042537	0.113	0.236	0	0	0	0	Got2|1	1	51	126	53607	http://www.ebi.ac.uk/QuickGO/GTerm?id=GO:0042537	[]
8	6,7,8	megakaryocyte development	GO:0035855	0.113	0.236	0	0	0	0	Ep300|1	1	51	126	53607	http://www.ebi.ac.uk/QuickGO/GTerm?id=GO:0035855	[]
5	5	cerebral cortex neuron differentiation	GO:0021895	0.113	0.236	0	0	0	0	Rac1|1	1	51	126	53607	http://www.ebi.ac.uk/QuickGO/GTerm?id=GO:0021895	[]
6	5,6	behavioral response to cocaine	GO:0048148	0.113	0.236	0	0	0	0	Abat|1	1	51	126	53607	http://www.ebi.ac.uk/QuickGO/GTerm?id=GO:0048148	[]
4	4	response to arsenic-containing substance	GO:0046685	0.113	0.236	0	0	0	0	Hnrnpa1|1	1	51	126	53607	http://www.ebi.ac.uk/QuickGO/GTerm?id=GO:0046685	[]
6	5,6	cytoskeletal anchoring at plasma membrane	GO:0007016	0.113	0.236	0	0	0	0	Epb41l3|1	1	51	126	53607	http://www.ebi.ac.uk/QuickGO/GTerm?id=GO:0007016	[]
4	4	regulation of neurotransmitter levels	GO:0001505	0.113	0.236	0	0	0	0	Aldh5a1|1;Abat|1;Syn1|1	3	498	126	53607	http://www.ebi.ac.uk/QuickGO/GTerm?id=GO:0001505	[]
5	5	icosanoid metabolic process	GO:0006690	0.114	0.236	0	0	0	0	Ptges3|1;Fam213b|1	2	245	126	53607	http://www.ebi.ac.uk/QuickGO/GTerm?id=GO:0006690	[]
5	5	mitotic spindle organization	GO:0007052	0.114	0.236	0	0	0	0	Cltc|1;Gnai1|1	2	245	126	53607	http://www.ebi.ac.uk/QuickGO/GTerm?id=GO:0007052	[]
4	4	multicellular organismal response to stress	GO:0033555	0.114	0.236	0	0	0	0	Dbi|1;Ppp3ca|1	2	245	126	53607	http://www.ebi.ac.uk/QuickGO/GTerm?id=GO:0033555	[]
5	3,4,5	regulation of homeostatic process	GO:0032844	0.114	0.236	0	0	0	0	Dbi|1;Hnrnpa2b1|1;Abat|1;Hspa9|1;Vsnl1|1	5	1086	126	53607	http://www.ebi.ac.uk/QuickGO/GTerm?id=GO:0032844	[]
3	3	multi-multicellular organism process	GO:0044706	0.114	0.237	0	0	0	0	Prdx3|1;Got2|1;Calr|1	3	500	126	53607	http://www.ebi.ac.uk/QuickGO/GTerm?id=GO:0044706	[]
4	4	response to heat	GO:0009408	0.114	0.237	0	0	0	0	Ywhae|1;Hspd1|1	2	246	126	53607	http://www.ebi.ac.uk/QuickGO/GTerm?id=GO:0009408	[]
5	5	limbic system development	GO:0021761	0.114	0.237	0	0	0	0	Ywhae|1;Slc32a1|1	2	246	126	53607	http://www.ebi.ac.uk/QuickGO/GTerm?id=GO:0021761	[]
4	4	regulation of response to biotic stimulus	GO:0002831	0.115	0.237	0	0	0	0	Anxa5|1;Hspd1|1;Mdh1|1	3	501	126	53607	http://www.ebi.ac.uk/QuickGO/GTerm?id=GO:0002831	[]
8	8	metal ion homeostasis	GO:0055065	0.115	0.237	0	0	0	0	Dbi|1;Immt|1;Atp2b1|1;Ywhae|1;Anxa6|1;Calb1|1	6	1407	126	53607	http://www.ebi.ac.uk/QuickGO/GTerm?id=GO:0055065	[]
9	5,6,7,8,9	positive regulation of protein export from nucleus	GO:0046827	0.115	0.237	0	0	0	0	Ywhae|1	1	52	126	53607	http://www.ebi.ac.uk/QuickGO/GTerm?id=GO:0046827	[]
10	6,7,8,9,10	regulation of SMAD protein import into nucleus	GO:0060390	0.115	0.237	0	0	0	0	Sptbn1|1	1	52	126	53607	http://www.ebi.ac.uk/QuickGO/GTerm?id=GO:0060390	[]
5	4,5	immune response to tumor cell	GO:0002418	0.115	0.237	0	0	0	0	Hspd1|1	1	52	126	53607	http://www.ebi.ac.uk/QuickGO/GTerm?id=GO:0002418	[]
4	3,4	negative regulation of cell killing	GO:0031342	0.115	0.237	0	0	0	0	Hsp90ab1|1	1	52	126	53607	http://www.ebi.ac.uk/QuickGO/GTerm?id=GO:0031342	[]
7	7	macrophage derived foam cell differentiation	GO:0010742	0.115	0.237	0	0	0	0	Ep300|1	1	52	126	53607	http://www.ebi.ac.uk/QuickGO/GTerm?id=GO:0010742	[]
8	8	L-amino acid import	GO:0043092	0.115	0.237	0	0	0	0	Slc1a2|1	1	52	126	53607	http://www.ebi.ac.uk/QuickGO/GTerm?id=GO:0043092	[]
9	8,9	N-terminal protein amino acid acetylation	GO:0006474	0.115	0.237	0	0	0	0	Ep300|1	1	52	126	53607	http://www.ebi.ac.uk/QuickGO/GTerm?id=GO:0006474	[]
5	5	lipid biosynthetic process	GO:0008610	0.116	0.238	0	0	0	0	Dbi|1;Ptges3|1;Decr2|1;Sptlc3|1;Cyb5r1|1;Fam213b|1	6	1409	126	53607	http://www.ebi.ac.uk/QuickGO/GTerm?id=GO:0008610	[]
6	4,5,6	negative regulation of macromolecule metabolic process	GO:0010605	0.116	0.24	0	0	0	0	Ywhaq|1;Cbx1|1;Pabpc1|1;H2afz|1;Ep300|1;H2afj|1;Hmgn2|1;Hnrnpa2b1|1;Cltc|1;Rock2|1;Lrpprc|1;Prdx3|1;Ppp3ca|1;Ywhae|1;Eno1|1;H2afy2|1;Pura|1;Basp1|1;Hsp90ab1|1;Calr|1	20	6429	126	53607	http://www.ebi.ac.uk/QuickGO/GTerm?id=GO:0010605	[]
7	6,7	cellular response to interferon-gamma	GO:0071346	0.117	0.24	0	0	0	0	Hsp90ab1|1;Ass1|1	2	249	126	53607	http://www.ebi.ac.uk/QuickGO/GTerm?id=GO:0071346	[]
6	5,6	regulation of necrotic cell death	GO:0010939	0.117	0.241	0	0	0	0	Ndufc2|1	1	53	126	53607	http://www.ebi.ac.uk/QuickGO/GTerm?id=GO:0010939	[]
7	6,7	membrane tubulation	GO:0097320	0.117	0.241	0	0	0	0	Sh3gl2|1	1	53	126	53607	http://www.ebi.ac.uk/QuickGO/GTerm?id=GO:0097320	[]
6	6	foam cell differentiation	GO:0090077	0.117	0.241	0	0	0	0	Ep300|1	1	53	126	53607	http://www.ebi.ac.uk/QuickGO/GTerm?id=GO:0090077	[]
10	6,7,8,10	positive regulation of defense response to virus by host	GO:0002230	0.117	0.241	0	0	0	0	Anxa5|1;Mdh1|1	2	250	126	53607	http://www.ebi.ac.uk/QuickGO/GTerm?id=GO:0002230	[]
5	5	neuron death	GO:0070997	0.118	0.243	0	0	0	0	Dnajc5|1;Prdx3|1;Hsp90ab1|1;Hspd1|1	4	795	126	53607	http://www.ebi.ac.uk/QuickGO/GTerm?id=GO:0070997	[]
7	7	amyloid-beta formation	GO:0034205	0.119	0.244	0	0	0	0	Rock2|1	1	54	126	53607	http://www.ebi.ac.uk/QuickGO/GTerm?id=GO:0034205	[]
6	6	regulation of cell maturation	GO:1903429	0.119	0.244	0	0	0	0	Rac1|1	1	54	126	53607	http://www.ebi.ac.uk/QuickGO/GTerm?id=GO:1903429	[]
7	6,7	DNA topological change	GO:0006265	0.119	0.244	0	0	0	0	Top1|1	1	54	126	53607	http://www.ebi.ac.uk/QuickGO/GTerm?id=GO:0006265	[]
8	6,7,8	positive regulation of interferon-alpha production	GO:0032727	0.119	0.244	0	0	0	0	Hspd1|1	1	54	126	53607	http://www.ebi.ac.uk/QuickGO/GTerm?id=GO:0032727	[]
6	5,6	negative regulation of cell junction assembly	GO:1901889	0.119	0.244	0	0	0	0	Rock2|1	1	54	126	53607	http://www.ebi.ac.uk/QuickGO/GTerm?id=GO:1901889	[]
7	7	amino acid import	GO:0043090	0.119	0.244	0	0	0	0	Slc1a2|1	1	54	126	53607	http://www.ebi.ac.uk/QuickGO/GTerm?id=GO:0043090	[]
8	6,7,8	interferon-gamma-mediated signaling pathway	GO:0060333	0.121	0.247	0	0	0	0	Hsp90ab1|1	1	55	126	53607	http://www.ebi.ac.uk/QuickGO/GTerm?id=GO:0060333	[]
7	7	aspartate family amino acid biosynthetic process	GO:0009067	0.121	0.247	0	0	0	0	Got2|1	1	55	126	53607	http://www.ebi.ac.uk/QuickGO/GTerm?id=GO:0009067	[]
5	5	regulation of chromatin binding	GO:0035561	0.121	0.247	0	0	0	0	Ppp3ca|1	1	55	126	53607	http://www.ebi.ac.uk/QuickGO/GTerm?id=GO:0035561	[]
10	5,6,7,8,9,10	positive regulation of telomere maintenance via telomere lengthening	GO:1904358	0.121	0.247	0	0	0	0	Hnrnpa2b1|1	1	55	126	53607	http://www.ebi.ac.uk/QuickGO/GTerm?id=GO:1904358	[]
7	6,7	regulation of amyloid precursor protein catabolic process	GO:1902991	0.121	0.247	0	0	0	0	Rock2|1	1	55	126	53607	http://www.ebi.ac.uk/QuickGO/GTerm?id=GO:1902991	[]
9	6,7,8,9	negative regulation of calcium ion transmembrane transporter activity	GO:1901020	0.121	0.247	0	0	0	0	Ywhae|1	1	55	126	53607	http://www.ebi.ac.uk/QuickGO/GTerm?id=GO:1901020	[]
False	obselete	obsolete death	GO:0016265	0.122	0.247	0	0	0	0	Ywhaz|1;Ep300|1;Rock2|1;Dnajc5|1;Prdx3|1;Anxa5|1;Pdk1|1;Pura|1;Anxa6|1;Hsp90ab1|1;Hspd1|1;Epb41l3|1	12	3502	126	53607	http://www.ebi.ac.uk/QuickGO/GTerm?id=GO:0016265	[]
4	4	regulation of catabolic process	GO:0009894	0.122	0.247	0	0	0	0	Pabpc1|1;Dbi|1;Lrpprc|1;Anxa5|1;Pdk1|1;Atp6v0a1|1;Hsp90ab1|1;Mdh1|1	8	2098	126	53607	http://www.ebi.ac.uk/QuickGO/GTerm?id=GO:0009894	[]
8	6,8	regulation of protein depolymerization	GO:1901879	0.122	0.247	0	0	0	0	Spta1|1;Sptbn1|1	2	256	126	53607	http://www.ebi.ac.uk/QuickGO/GTerm?id=GO:1901879	[]
8	4,7,8	positive regulation of protein localization to cell surface	GO:2000010	0.124	0.249	0	0	0	0	Hsp90ab1|1	1	56	126	53607	http://www.ebi.ac.uk/QuickGO/GTerm?id=GO:2000010	[]
6	6	pyridine-containing compound biosynthetic process	GO:0072525	0.124	0.249	0	0	0	0	Idh2|1	1	56	126	53607	http://www.ebi.ac.uk/QuickGO/GTerm?id=GO:0072525	[]
4	4	muscle hypertrophy in response to stress	GO:0003299	0.124	0.249	0	0	0	0	Ppp3ca|1	1	56	126	53607	http://www.ebi.ac.uk/QuickGO/GTerm?id=GO:0003299	[]
5	5	negative regulation of fatty acid metabolic process	GO:0045922	0.124	0.249	0	0	0	0	Dbi|1	1	56	126	53607	http://www.ebi.ac.uk/QuickGO/GTerm?id=GO:0045922	[]
7	5,6,7	mitochondrial transmembrane transport	GO:1990542	0.124	0.249	0	0	0	0	Atp5o|1	1	56	126	53607	http://www.ebi.ac.uk/QuickGO/GTerm?id=GO:1990542	[]
11	5,11	regulation of synaptic transmission, GABAergic	GO:0032228	0.124	0.249	0	0	0	0	Dbi|1	1	56	126	53607	http://www.ebi.ac.uk/QuickGO/GTerm?id=GO:0032228	[]
7	6,7	inner mitochondrial membrane organization	GO:0007007	0.124	0.249	0	0	0	0	Immt|1	1	56	126	53607	http://www.ebi.ac.uk/QuickGO/GTerm?id=GO:0007007	[]
8	5,6,8	cardiac muscle hypertrophy in response to stress	GO:0014898	0.124	0.249	0	0	0	0	Ppp3ca|1	1	56	126	53607	http://www.ebi.ac.uk/QuickGO/GTerm?id=GO:0014898	[]
4	4	regulation of cellular component organization	GO:0051128	0.124	0.249	0	0	0	0	Ep300|1;Spta1|1;Hnrnpa2b1|1;Cltc|1;Negr1|1;Cyfip1|1;Rock2|1;Lrpprc|1;Lypla1|1;Sptbn1|1;Gnai1|1;Ppp3ca|1;Anxa5|1;Pdk1|1;Cyb5r1|1;Rac1|1;Sh3gl2|1;Epb41l3|1;Mdh1|1;Calr|1	20	6483	126	53607	http://www.ebi.ac.uk/QuickGO/GTerm?id=GO:0051128	[]
5	5	regulation of protein binding	GO:0043393	0.124	0.25	0	0	0	0	Ep300|1;Spta1|1;Hsp90ab1|1	3	520	126	53607	http://www.ebi.ac.uk/QuickGO/GTerm?id=GO:0043393	[]
10	6,7,9,10	positive regulation of actin filament polymerization	GO:0030838	0.125	0.252	0	0	0	0	Cyfip1|1;Rac1|1	2	260	126	53607	http://www.ebi.ac.uk/QuickGO/GTerm?id=GO:0030838	[]
7	7	metal ion transport	GO:0030001	0.125	0.252	0	0	0	0	Dbi|1;Cltc|1;Gnao1|1;Ppp3ca|1;Atp2b1|1;Ywhae|1;Anxa6|1;Slc12a2|1	8	2113	126	53607	http://www.ebi.ac.uk/QuickGO/GTerm?id=GO:0030001	[]
6	6	response to iron ion	GO:0010039	0.126	0.252	0	0	0	0	Abat|1	1	57	126	53607	http://www.ebi.ac.uk/QuickGO/GTerm?id=GO:0010039	[]
7	5,7	cardiac muscle adaptation	GO:0014887	0.126	0.252	0	0	0	0	Ppp3ca|1	1	57	126	53607	http://www.ebi.ac.uk/QuickGO/GTerm?id=GO:0014887	[]
9	5,6,7,8,9	positive regulation of focal adhesion assembly	GO:0051894	0.126	0.252	0	0	0	0	Rac1|1	1	57	126	53607	http://www.ebi.ac.uk/QuickGO/GTerm?id=GO:0051894	[]
6	5,6	folic acid-containing compound metabolic process	GO:0006760	0.126	0.252	0	0	0	0	Aldh1l1|1	1	57	126	53607	http://www.ebi.ac.uk/QuickGO/GTerm?id=GO:0006760	[]
6	5,6	positive regulation of macrophage activation	GO:0043032	0.126	0.252	0	0	0	0	Hspd1|1	1	57	126	53607	http://www.ebi.ac.uk/QuickGO/GTerm?id=GO:0043032	[]
6	6	chemical synaptic transmission, postsynaptic	GO:0099565	0.126	0.252	0	0	0	0	Ppp3ca|1;Abat|1	2	261	126	53607	http://www.ebi.ac.uk/QuickGO/GTerm?id=GO:0099565	[]
6	6	ion homeostasis	GO:0050801	0.126	0.253	0	0	0	0	Dbi|1;Immt|1;Atp2b1|1;Ywhae|1;Atp6v0a1|1;Anxa6|1;Calb1|1	7	1778	126	53607	http://www.ebi.ac.uk/QuickGO/GTerm?id=GO:0050801	[]
5	4,5	positive regulation of chemotaxis	GO:0050921	0.127	0.253	0	0	0	0	Rac1|1;Calr|1	2	262	126	53607	http://www.ebi.ac.uk/QuickGO/GTerm?id=GO:0050921	[]
7	6,7	actomyosin structure organization	GO:0031032	0.127	0.254	0	0	0	0	Ep300|1;Rac1|1;Epb41l3|1	3	526	126	53607	http://www.ebi.ac.uk/QuickGO/GTerm?id=GO:0031032	[]
7	6,7	cellular response to type I interferon	GO:0071357	0.128	0.254	0	0	0	0	Hsp90ab1|1	1	58	126	53607	http://www.ebi.ac.uk/QuickGO/GTerm?id=GO:0071357	[]
8	6,7,8	type I interferon signaling pathway	GO:0060337	0.128	0.254	0	0	0	0	Hsp90ab1|1	1	58	126	53607	http://www.ebi.ac.uk/QuickGO/GTerm?id=GO:0060337	[]
5	5	response to salt stress	GO:0009651	0.128	0.254	0	0	0	0	Hsp90ab1|1	1	58	126	53607	http://www.ebi.ac.uk/QuickGO/GTerm?id=GO:0009651	[]
7	7	polyamine metabolic process	GO:0006595	0.128	0.254	0	0	0	0	Sat2|1	1	58	126	53607	http://www.ebi.ac.uk/QuickGO/GTerm?id=GO:0006595	[]
8	6,7,8	positive regulation of glycoprotein biosynthetic process	GO:0010560	0.128	0.254	0	0	0	0	Ep300|1	1	58	126	53607	http://www.ebi.ac.uk/QuickGO/GTerm?id=GO:0010560	[]
7	6,7	keratinocyte differentiation	GO:0030216	0.128	0.255	0	0	0	0	Rock2|1;H2afy2|1	2	264	126	53607	http://www.ebi.ac.uk/QuickGO/GTerm?id=GO:0030216	[]
5	5	cell-cell junction organization	GO:0045216	0.128	0.256	0	0	0	0	Rock2|1;Rac1|1;Epb41l3|1	3	528	126	53607	http://www.ebi.ac.uk/QuickGO/GTerm?id=GO:0045216	[]
6	5,6	semaphorin-plexin signaling pathway	GO:0071526	0.13	0.256	0	0	0	0	Rac1|1	1	59	126	53607	http://www.ebi.ac.uk/QuickGO/GTerm?id=GO:0071526	[]
5	5	cochlea morphogenesis	GO:0090103	0.13	0.256	0	0	0	0	Rac1|1	1	59	126	53607	http://www.ebi.ac.uk/QuickGO/GTerm?id=GO:0090103	[]
7	5,6,7	regulation of ruffle assembly	GO:1900027	0.13	0.256	0	0	0	0	Cyfip1|1	1	59	126	53607	http://www.ebi.ac.uk/QuickGO/GTerm?id=GO:1900027	[]
8	8	peptidyl-cysteine modification	GO:0018198	0.13	0.256	0	0	0	0	Prdx3|1	1	59	126	53607	http://www.ebi.ac.uk/QuickGO/GTerm?id=GO:0018198	[]
4	4	response to tumor cell	GO:0002347	0.13	0.256	0	0	0	0	Hspd1|1	1	59	126	53607	http://www.ebi.ac.uk/QuickGO/GTerm?id=GO:0002347	[]
7	7	response to amphetamine	GO:0001975	0.13	0.256	0	0	0	0	Ppp3ca|1	1	59	126	53607	http://www.ebi.ac.uk/QuickGO/GTerm?id=GO:0001975	[]
8	7,8	regulation of fatty acid oxidation	GO:0046320	0.13	0.256	0	0	0	0	Dbi|1	1	59	126	53607	http://www.ebi.ac.uk/QuickGO/GTerm?id=GO:0046320	[]
7	7	positive regulation of phosphatase activity	GO:0010922	0.13	0.256	0	0	0	0	Hsp90ab1|1	1	59	126	53607	http://www.ebi.ac.uk/QuickGO/GTerm?id=GO:0010922	[]
6	6	positive regulation of collagen biosynthetic process	GO:0032967	0.13	0.256	0	0	0	0	Ep300|1	1	59	126	53607	http://www.ebi.ac.uk/QuickGO/GTerm?id=GO:0032967	[]
6	5,6	positive regulation of adherens junction organization	GO:1903393	0.13	0.256	0	0	0	0	Rac1|1	1	59	126	53607	http://www.ebi.ac.uk/QuickGO/GTerm?id=GO:1903393	[]
6	4,6	positive regulation of leukocyte migration	GO:0002687	0.131	0.259	0	0	0	0	Rac1|1;Calr|1	2	268	126	53607	http://www.ebi.ac.uk/QuickGO/GTerm?id=GO:0002687	[]
7	5,7	positive regulation of neutrophil migration	GO:1902624	0.132	0.259	0	0	0	0	Rac1|1	1	60	126	53607	http://www.ebi.ac.uk/QuickGO/GTerm?id=GO:1902624	[]
6	6	monosaccharide catabolic process	GO:0046365	0.132	0.259	0	0	0	0	Ldha|1	1	60	126	53607	http://www.ebi.ac.uk/QuickGO/GTerm?id=GO:0046365	[]
7	5,6,7	positive regulation of collagen metabolic process	GO:0010714	0.132	0.259	0	0	0	0	Ep300|1	1	60	126	53607	http://www.ebi.ac.uk/QuickGO/GTerm?id=GO:0010714	[]
6	5,6	regulation of transforming growth factor beta production	GO:0071634	0.132	0.259	0	0	0	0	Hsp90ab1|1	1	60	126	53607	http://www.ebi.ac.uk/QuickGO/GTerm?id=GO:0071634	[]
5	5	regulation of glial cell proliferation	GO:0060251	0.132	0.259	0	0	0	0	Idh2|1	1	60	126	53607	http://www.ebi.ac.uk/QuickGO/GTerm?id=GO:0060251	[]
4	4	respiratory burst	GO:0045730	0.132	0.259	0	0	0	0	Rac1|1	1	60	126	53607	http://www.ebi.ac.uk/QuickGO/GTerm?id=GO:0045730	[]
4	4	negative regulation of cellular component organization	GO:0051129	0.132	0.259	0	0	0	0	Ep300|1;Spta1|1;Cltc|1;Rock2|1;Lypla1|1;Sptbn1|1;Ppp3ca|1	7	1798	126	53607	http://www.ebi.ac.uk/QuickGO/GTerm?id=GO:0051129	[]
2	2	positive regulation of biological process	GO:0048518	0.132	0.259	0	0	0	0	Pabpc1|1;H2afz|1;Ep300|1;Dbi|1;Spta1|1;Tfam|1;Hnrnpa2b1|1;Negr1|1;Cyfip1|1;Rock2|1;Ptges3|1;Ndufc2|1;Prdx3|1;Gnao1|1;Ube2o|1;Sptbn1|1;Gnai1|1;Ppp3ca|1;Glud1|1;Abat|1;Eef2|1;Anxa5|1;Pdk1|1;Ywhae|1;H2afy2|1;Pura|1;Cyb5r1|1;Psd3|1;Hnrnpm|1;Sept5|1;Hsp90ab1|1;Ass1|1;Atp5a1|1;Slc1a2|1;Rac1|1;Sh3gl2|1;Hspd1|1;Calb1|1;Vsnl1|1;Mdh1|1;Calr|1	41	14841	126	53607	http://www.ebi.ac.uk/QuickGO/GTerm?id=GO:0048518	[]
7	5,6,7	microtubule cytoskeleton organization involved in mitosis	GO:1902850	0.132	0.259	0	0	0	0	Cltc|1;Gnai1|1	2	269	126	53607	http://www.ebi.ac.uk/QuickGO/GTerm?id=GO:1902850	[]
6	5,6	regulation of extent of cell growth	GO:0061387	0.132	0.259	0	0	0	0	Ep300|1;Cyfip1|1	2	269	126	53607	http://www.ebi.ac.uk/QuickGO/GTerm?id=GO:0061387	[]
6	6	cellular response to growth factor stimulus	GO:0071363	0.133	0.26	0	0	0	0	Ep300|1;Cyfip1|1;Ube2o|1;Eef2|1;Hsp90ab1|1;Sh3gl2|1	6	1467	126	53607	http://www.ebi.ac.uk/QuickGO/GTerm?id=GO:0071363	[]
6	5,6	positive regulation of cytokine secretion	GO:0050715	0.134	0.262	0	0	0	0	Sptbn1|1;Hspd1|1	2	271	126	53607	http://www.ebi.ac.uk/QuickGO/GTerm?id=GO:0050715	[]
5	5	response to vitamin D	GO:0033280	0.134	0.262	0	0	0	0	Atp2b1|1	1	61	126	53607	http://www.ebi.ac.uk/QuickGO/GTerm?id=GO:0033280	[]
5	5	heme biosynthetic process	GO:0006783	0.134	0.262	0	0	0	0	Iba57|1	1	61	126	53607	http://www.ebi.ac.uk/QuickGO/GTerm?id=GO:0006783	[]
9	7,8,9	positive regulation of calcineurin-NFAT signaling cascade	GO:0070886	0.134	0.262	0	0	0	0	Ppp3ca|1	1	61	126	53607	http://www.ebi.ac.uk/QuickGO/GTerm?id=GO:0070886	[]
5	5	muscle contraction	GO:0006936	0.135	0.264	0	0	0	0	Rock2|1;Abat|1;Eef2|1;Anxa6|1	4	837	126	53607	http://www.ebi.ac.uk/QuickGO/GTerm?id=GO:0006936	[]
11	6,7,8,9,11	positive regulation of phosphatidylinositol 3-kinase activity	GO:0043552	0.136	0.264	0	0	0	0	Rac1|1	1	62	126	53607	http://www.ebi.ac.uk/QuickGO/GTerm?id=GO:0043552	[]
7	5,7	positive regulation of smooth muscle contraction	GO:0045987	0.136	0.264	0	0	0	0	Abat|1	1	62	126	53607	http://www.ebi.ac.uk/QuickGO/GTerm?id=GO:0045987	[]
8	6,7,8	neurotrophin TRK receptor signaling pathway	GO:0048011	0.136	0.264	0	0	0	0	Cyfip1|1	1	62	126	53607	http://www.ebi.ac.uk/QuickGO/GTerm?id=GO:0048011	[]
5	5	transforming growth factor beta production	GO:0071604	0.136	0.264	0	0	0	0	Hsp90ab1|1	1	62	126	53607	http://www.ebi.ac.uk/QuickGO/GTerm?id=GO:0071604	[]
4	4	sleep	GO:0030431	0.136	0.264	0	0	0	0	Dlat|1	1	62	126	53607	http://www.ebi.ac.uk/QuickGO/GTerm?id=GO:0030431	[]
8	7,8	telomere capping	GO:0016233	0.136	0.264	0	0	0	0	Hnrnpa2b1|1	1	62	126	53607	http://www.ebi.ac.uk/QuickGO/GTerm?id=GO:0016233	[]
4	3,4	developmental growth	GO:0048589	0.136	0.265	0	0	0	0	Ep300|1;Cyfip1|1;Gpd2|1;Hsp90ab1|1;Slc1a2|1;Sh3gl2|1;Slc12a2|1	7	1815	126	53607	http://www.ebi.ac.uk/QuickGO/GTerm?id=GO:0048589	[]
5	5	cellular nitrogen compound catabolic process	GO:0044270	0.137	0.266	0	0	0	0	Pabpc1|1;Lrpprc|1;Aldh1l1|1;Cnp|1	4	840	126	53607	http://www.ebi.ac.uk/QuickGO/GTerm?id=GO:0044270	[]
6	6	positive regulation of mRNA catabolic process	GO:0061014	0.138	0.267	0	0	0	0	Pabpc1|1	1	63	126	53607	http://www.ebi.ac.uk/QuickGO/GTerm?id=GO:0061014	[]
8	6,7,8	positive regulation of microtubule polymerization	GO:0031116	0.138	0.267	0	0	0	0	Rac1|1	1	63	126	53607	http://www.ebi.ac.uk/QuickGO/GTerm?id=GO:0031116	[]
11	8,9,10,11	positive regulation of histone acetylation	GO:0035066	0.138	0.267	0	0	0	0	Ep300|1	1	63	126	53607	http://www.ebi.ac.uk/QuickGO/GTerm?id=GO:0035066	[]
13	4,7,8,10,11,12,13	positive regulation of insulin secretion involved in cellular response to glucose stimulus	GO:0035774	0.138	0.267	0	0	0	0	Vsnl1|1	1	63	126	53607	http://www.ebi.ac.uk/QuickGO/GTerm?id=GO:0035774	[]
4	4	sperm capacitation	GO:0048240	0.138	0.267	0	0	0	0	Dld|1	1	63	126	53607	http://www.ebi.ac.uk/QuickGO/GTerm?id=GO:0048240	[]
4	4	actin filament-based process	GO:0030029	0.138	0.267	0	0	0	0	Ep300|1;Spta1|1;Cyfip1|1;Rock2|1;Sptbn1|1;Rac1|1;Epb41l3|1;Calr|1	8	2164	126	53607	http://www.ebi.ac.uk/QuickGO/GTerm?id=GO:0030029	[]
6	5,6	negative regulation of gene expression	GO:0010629	0.139	0.269	0	0	0	0	Ywhaq|1;Cbx1|1;Pabpc1|1;H2afz|1;Ep300|1;H2afj|1;Hmgn2|1;Hnrnpa2b1|1;Ppp3ca|1;Eno1|1;H2afy2|1;Pura|1;Basp1|1;Calr|1	14	4328	126	53607	http://www.ebi.ac.uk/QuickGO/GTerm?id=GO:0010629	[]
4	4	adult behavior	GO:0030534	0.139	0.269	0	0	0	0	Abat|1;Cnp|1;Slc1a2|1	3	548	126	53607	http://www.ebi.ac.uk/QuickGO/GTerm?id=GO:0030534	[]
4	4	regulation of body fluid levels	GO:0050878	0.139	0.269	0	0	0	0	Got2|1;Abat|1;Anxa5|1;Copa|1	4	846	126	53607	http://www.ebi.ac.uk/QuickGO/GTerm?id=GO:0050878	[]
7	7	protein deacylation	GO:0035601	0.139	0.269	0	0	0	0	Ep300|1;Lypla1|1	2	278	126	53607	http://www.ebi.ac.uk/QuickGO/GTerm?id=GO:0035601	[]
10	5,8,9,10	positive regulation of transcription from RNA polymerase II promoter involved in cellular response to chemical stimulus	GO:1901522	0.14	0.269	0	0	0	0	Ep300|1	1	64	126	53607	http://www.ebi.ac.uk/QuickGO/GTerm?id=GO:1901522	[]
8	7,8	clathrin coat assembly	GO:0048268	0.14	0.269	0	0	0	0	Cltc|1	1	64	126	53607	http://www.ebi.ac.uk/QuickGO/GTerm?id=GO:0048268	[]
8	5,6,7,8	positive regulation of transforming growth factor beta receptor signaling pathway	GO:0030511	0.14	0.269	0	0	0	0	Hsp90ab1|1	1	64	126	53607	http://www.ebi.ac.uk/QuickGO/GTerm?id=GO:0030511	[]
7	7	cyclic nucleotide catabolic process	GO:0009214	0.14	0.269	0	0	0	0	Cnp|1	1	64	126	53607	http://www.ebi.ac.uk/QuickGO/GTerm?id=GO:0009214	[]
5	5	auditory receptor cell morphogenesis	GO:0002093	0.14	0.269	0	0	0	0	Rac1|1	1	64	126	53607	http://www.ebi.ac.uk/QuickGO/GTerm?id=GO:0002093	[]
5	5	regulation of skeletal muscle adaptation	GO:0014733	0.14	0.269	0	0	0	0	Ppp3ca|1	1	64	126	53607	http://www.ebi.ac.uk/QuickGO/GTerm?id=GO:0014733	[]
12	8,9,11,12	regulation of Arp2/3 complex-mediated actin nucleation	GO:0034315	0.14	0.269	0	0	0	0	Cyfip1|1	1	64	126	53607	http://www.ebi.ac.uk/QuickGO/GTerm?id=GO:0034315	[]
6	4,6	positive regulation of cellular response to transforming growth factor beta stimulus	GO:1903846	0.14	0.269	0	0	0	0	Hsp90ab1|1	1	64	126	53607	http://www.ebi.ac.uk/QuickGO/GTerm?id=GO:1903846	[]
13	9,10,13	histone H4-K16 acetylation	GO:0043984	0.14	0.269	0	0	0	0	Jade3|1	1	64	126	53607	http://www.ebi.ac.uk/QuickGO/GTerm?id=GO:0043984	[]
5	5	chromatin assembly	GO:0031497	0.141	0.27	0	0	0	0	H3f3c|1;H2afy2|1	2	280	126	53607	http://www.ebi.ac.uk/QuickGO/GTerm?id=GO:0031497	[]
5	5	lipid modification	GO:0030258	0.141	0.27	0	0	0	0	Dbi|1;Etfdh|1;Acat1|1	3	552	126	53607	http://www.ebi.ac.uk/QuickGO/GTerm?id=GO:0030258	[]
6	5,6	cell morphogenesis involved in differentiation	GO:0000904	0.142	0.27	0	0	0	0	Ep300|1;Cyfip1|1;Rock2|1;Ppp3ca|1;Cnp|1;Hsp90ab1|1;Rac1|1;Calr|1	8	2178	126	53607	http://www.ebi.ac.uk/QuickGO/GTerm?id=GO:0000904	[]
6	4,5,6	positive regulation of cell-substrate adhesion	GO:0010811	0.142	0.27	0	0	0	0	Rac1|1;Calr|1	2	281	126	53607	http://www.ebi.ac.uk/QuickGO/GTerm?id=GO:0010811	[]
7	7	DNA-templated transcription, initiation	GO:0006352	0.142	0.27	0	0	0	0	Tfam|1;Taf6|1	2	281	126	53607	http://www.ebi.ac.uk/QuickGO/GTerm?id=GO:0006352	[]
7	5,7	nucleosome organization	GO:0034728	0.142	0.27	0	0	0	0	H3f3c|1;H2afy2|1	2	281	126	53607	http://www.ebi.ac.uk/QuickGO/GTerm?id=GO:0034728	[]
6	5,6	positive regulation of interleukin-10 production	GO:0032733	0.142	0.27	0	0	0	0	Hspd1|1	1	65	126	53607	http://www.ebi.ac.uk/QuickGO/GTerm?id=GO:0032733	[]
8	8	L-glutamate transport	GO:0015813	0.142	0.27	0	0	0	0	Slc1a2|1	1	65	126	53607	http://www.ebi.ac.uk/QuickGO/GTerm?id=GO:0015813	[]
8	7,8	regulation of transcription from RNA polymerase I promoter	GO:0006356	0.142	0.27	0	0	0	0	H2afy2|1	1	65	126	53607	http://www.ebi.ac.uk/QuickGO/GTerm?id=GO:0006356	[]
5	5	positive regulation of viral transcription	GO:0050434	0.142	0.27	0	0	0	0	Ep300|1	1	65	126	53607	http://www.ebi.ac.uk/QuickGO/GTerm?id=GO:0050434	[]
7	5,6,7	positive regulation of glycoprotein metabolic process	GO:1903020	0.142	0.27	0	0	0	0	Ep300|1	1	65	126	53607	http://www.ebi.ac.uk/QuickGO/GTerm?id=GO:1903020	[]
3	3	positive regulation of cellular process	GO:0048522	0.142	0.271	0	0	0	0	Pabpc1|1;H2afz|1;Ep300|1;Dbi|1;Spta1|1;Tfam|1;Hnrnpa2b1|1;Negr1|1;Cyfip1|1;Rock2|1;Ptges3|1;Ndufc2|1;Prdx3|1;Ube2o|1;Sptbn1|1;Ppp3ca|1;Glud1|1;Abat|1;Eef2|1;Anxa5|1;Pdk1|1;H2afy2|1;Pura|1;Cyb5r1|1;Hnrnpm|1;Sept5|1;Hsp90ab1|1;Ass1|1;Atp5a1|1;Rac1|1;Sh3gl2|1;Hspd1|1;Calb1|1;Vsnl1|1;Mdh1|1;Calr|1	36	12915	126	53607	http://www.ebi.ac.uk/QuickGO/GTerm?id=GO:0048522	[]
9	5,6,7,9	regulation of defense response to virus by host	GO:0050691	0.143	0.271	0	0	0	0	Anxa5|1;Mdh1|1	2	282	126	53607	http://www.ebi.ac.uk/QuickGO/GTerm?id=GO:0050691	[]
6	6	macromolecule deacylation	GO:0098732	0.143	0.273	0	0	0	0	Ep300|1;Lypla1|1	2	283	126	53607	http://www.ebi.ac.uk/QuickGO/GTerm?id=GO:0098732	[]
4	4	response to starvation	GO:0042594	0.143	0.273	0	0	0	0	Anxa5|1;Pdk1|1;Acat1|1;Mdh1|1	4	856	126	53607	http://www.ebi.ac.uk/QuickGO/GTerm?id=GO:0042594	[]
8	8	regulation of cysteine-type endopeptidase activity	GO:2000116	0.143	0.273	0	0	0	0	Ep300|1;Prdx3|1;Hspd1|1	3	556	126	53607	http://www.ebi.ac.uk/QuickGO/GTerm?id=GO:2000116	[]
7	6,7	positive regulation of lamellipodium organization	GO:1902745	0.144	0.273	0	0	0	0	Rac1|1	1	66	126	53607	http://www.ebi.ac.uk/QuickGO/GTerm?id=GO:1902745	[]
6	6	cellular modified amino acid catabolic process	GO:0042219	0.144	0.273	0	0	0	0	Aldh1l1|1	1	66	126	53607	http://www.ebi.ac.uk/QuickGO/GTerm?id=GO:0042219	[]
10	5,6,7,8,10	positive regulation of lipid kinase activity	GO:0090218	0.144	0.273	0	0	0	0	Rac1|1	1	66	126	53607	http://www.ebi.ac.uk/QuickGO/GTerm?id=GO:0090218	[]
4	4	C21-steroid hormone metabolic process	GO:0008207	0.144	0.273	0	0	0	0	Afp|1	1	66	126	53607	http://www.ebi.ac.uk/QuickGO/GTerm?id=GO:0008207	[]
9	5,8,9	positive regulation of sequence-specific DNA binding transcription factor activity	GO:0051091	0.144	0.273	0	0	0	0	Ep300|1;Prdx3|1;Ppp3ca|1	3	557	126	53607	http://www.ebi.ac.uk/QuickGO/GTerm?id=GO:0051091	[]
7	6,7	negative regulation of fibril organization	GO:1902904	0.144	0.273	0	0	0	0	Spta1|1;Sptbn1|1	2	284	126	53607	http://www.ebi.ac.uk/QuickGO/GTerm?id=GO:1902904	[]
7	5,7	regulation of protein complex disassembly	GO:0043244	0.144	0.273	0	0	0	0	Spta1|1;Sptbn1|1	2	284	126	53607	http://www.ebi.ac.uk/QuickGO/GTerm?id=GO:0043244	[]
6	5,6	regulation of endocytosis	GO:0030100	0.145	0.273	0	0	0	0	Ppp3ca|1;Sh3gl2|1;Calr|1	3	558	126	53607	http://www.ebi.ac.uk/QuickGO/GTerm?id=GO:0030100	[]
5	5	regulation of cell development	GO:0060284	0.145	0.274	0	0	0	0	Ep300|1;Ywhag|1;Negr1|1;Cyfip1|1;Idh2|1;Rock2|1;Ppp3ca|1;Rac1|1;Calr|1	9	2543	126	53607	http://www.ebi.ac.uk/QuickGO/GTerm?id=GO:0060284	[]
5	5	heterocycle catabolic process	GO:0046700	0.145	0.274	0	0	0	0	Pabpc1|1;Lrpprc|1;Aldh1l1|1;Cnp|1	4	860	126	53607	http://www.ebi.ac.uk/QuickGO/GTerm?id=GO:0046700	[]
4	4	positive regulation of nitrogen compound metabolic process	GO:0051173	0.146	0.274	0	0	0	0	Pabpc1|1;H2afz|1;Ep300|1;Tfam|1;Hnrnpa2b1|1;Rock2|1;Ptges3|1;Ndufc2|1;Prdx3|1;Ppp3ca|1;Abat|1;Eef2|1;Hsp90ab1|1;Ass1|1;Rac1|1;Calr|1	16	5113	126	53607	http://www.ebi.ac.uk/QuickGO/GTerm?id=GO:0051173	[]
4	4	cerebellum development	GO:0021549	0.146	0.274	0	0	0	0	Glud1|1;Abat|1	2	286	126	53607	http://www.ebi.ac.uk/QuickGO/GTerm?id=GO:0021549	[]
9	7,9	dopaminergic neuron differentiation	GO:0071542	0.146	0.274	0	0	0	0	Rac1|1	1	67	126	53607	http://www.ebi.ac.uk/QuickGO/GTerm?id=GO:0071542	[]
8	6,8	regulation of endothelial cell differentiation	GO:0045601	0.146	0.274	0	0	0	0	Rock2|1	1	67	126	53607	http://www.ebi.ac.uk/QuickGO/GTerm?id=GO:0045601	[]
6	5,6	response to type I interferon	GO:0034340	0.146	0.274	0	0	0	0	Hsp90ab1|1	1	67	126	53607	http://www.ebi.ac.uk/QuickGO/GTerm?id=GO:0034340	[]
6	5,6	regulation of synaptic vesicle transport	GO:1902803	0.146	0.274	0	0	0	0	Cyfip1|1	1	67	126	53607	http://www.ebi.ac.uk/QuickGO/GTerm?id=GO:1902803	[]
6	4,6	negative regulation of intracellular transport	GO:0032387	0.147	0.277	0	0	0	0	Cyfip1|1;Lypla1|1	2	288	126	53607	http://www.ebi.ac.uk/QuickGO/GTerm?id=GO:0032387	[]
9	7,8,9	SMAD protein import into nucleus	GO:0007184	0.148	0.277	0	0	0	0	Sptbn1|1	1	68	126	53607	http://www.ebi.ac.uk/QuickGO/GTerm?id=GO:0007184	[]
8	6,8	negative regulation of calcium ion transmembrane transport	GO:1903170	0.148	0.277	0	0	0	0	Ywhae|1	1	68	126	53607	http://www.ebi.ac.uk/QuickGO/GTerm?id=GO:1903170	[]
8	4,6,7,8	positive regulation of organic acid transport	GO:0032892	0.148	0.277	0	0	0	0	Abat|1	1	68	126	53607	http://www.ebi.ac.uk/QuickGO/GTerm?id=GO:0032892	[]
6	5,6	cellular response to estradiol stimulus	GO:0071392	0.148	0.277	0	0	0	0	H2afz|1	1	68	126	53607	http://www.ebi.ac.uk/QuickGO/GTerm?id=GO:0071392	[]
5	5	aromatic compound catabolic process	GO:0019439	0.149	0.279	0	0	0	0	Pabpc1|1;Lrpprc|1;Aldh1l1|1;Cnp|1	4	869	126	53607	http://www.ebi.ac.uk/QuickGO/GTerm?id=GO:0019439	[]
9	8,9	regulation of calcium ion transmembrane transport	GO:1903169	0.15	0.279	0	0	0	0	Dbi|1;Ywhae|1	2	291	126	53607	http://www.ebi.ac.uk/QuickGO/GTerm?id=GO:1903169	[]
6	5,6	response to interferon-gamma	GO:0034341	0.15	0.279	0	0	0	0	Hsp90ab1|1;Ass1|1	2	291	126	53607	http://www.ebi.ac.uk/QuickGO/GTerm?id=GO:0034341	[]
7	6,7	regulation of interferon-alpha production	GO:0032647	0.15	0.279	0	0	0	0	Hspd1|1	1	69	126	53607	http://www.ebi.ac.uk/QuickGO/GTerm?id=GO:0032647	[]
9	6,7,8,9	regulation of gene silencing by miRNA	GO:0060964	0.15	0.279	0	0	0	0	Ppp3ca|1	1	69	126	53607	http://www.ebi.ac.uk/QuickGO/GTerm?id=GO:0060964	[]
7	6,7	regulation of neutrophil chemotaxis	GO:0090022	0.15	0.279	0	0	0	0	Rac1|1	1	69	126	53607	http://www.ebi.ac.uk/QuickGO/GTerm?id=GO:0090022	[]
5	5	pteridine-containing compound metabolic process	GO:0042558	0.15	0.279	0	0	0	0	Aldh1l1|1	1	69	126	53607	http://www.ebi.ac.uk/QuickGO/GTerm?id=GO:0042558	[]
7	7	regulation of lamellipodium assembly	GO:0010591	0.15	0.279	0	0	0	0	Rac1|1	1	69	126	53607	http://www.ebi.ac.uk/QuickGO/GTerm?id=GO:0010591	[]
7	5,7	negative regulation of anion transport	GO:1903792	0.15	0.279	0	0	0	0	Abat|1	1	69	126	53607	http://www.ebi.ac.uk/QuickGO/GTerm?id=GO:1903792	[]
5	5	ameboidal-type cell migration	GO:0001667	0.15	0.28	0	0	0	0	Rock2|1;Atp5a1|1;Rac1|1;Calr|1	4	872	126	53607	http://www.ebi.ac.uk/QuickGO/GTerm?id=GO:0001667	[]
6	6	interleukin-6 secretion	GO:0072604	0.152	0.282	0	0	0	0	Hspd1|1	1	70	126	53607	http://www.ebi.ac.uk/QuickGO/GTerm?id=GO:0072604	[]
9	7,8,9	regulation of clathrin-mediated endocytosis	GO:2000369	0.152	0.282	0	0	0	0	Sh3gl2|1	1	70	126	53607	http://www.ebi.ac.uk/QuickGO/GTerm?id=GO:2000369	[]
7	5,6,7	positive regulation of interleukin-12 production	GO:0032735	0.152	0.282	0	0	0	0	Hspd1|1	1	70	126	53607	http://www.ebi.ac.uk/QuickGO/GTerm?id=GO:0032735	[]
4	3,4	single organism cell adhesion	GO:0098602	0.152	0.282	0	0	0	0	Spta1|1;Negr1|1;Abat|1;Ass1|1;Rac1|1;Hspd1|1;Calr|1	7	1870	126	53607	http://www.ebi.ac.uk/QuickGO/GTerm?id=GO:0098602	[]
5	5	cellular response to oxidative stress	GO:0034599	0.152	0.283	0	0	0	0	Ep300|1;Prdx3|1;Pdk1|1	3	572	126	53607	http://www.ebi.ac.uk/QuickGO/GTerm?id=GO:0034599	[]
5	5	cellular response to nutrient levels	GO:0031669	0.153	0.284	0	0	0	0	Atp2b1|1;Anxa5|1;Pdk1|1;Mdh1|1	4	879	126	53607	http://www.ebi.ac.uk/QuickGO/GTerm?id=GO:0031669	[]
5	5	urogenital system development	GO:0001655	0.153	0.284	0	0	0	0	Acat1|1;Basp1|1;Ass1|1;Calb1|1	4	879	126	53607	http://www.ebi.ac.uk/QuickGO/GTerm?id=GO:0001655	[]
6	5,6	second-messenger-mediated signaling	GO:0019932	0.153	0.284	0	0	0	0	Gnai1|1;Ppp3ca|1;Vsnl1|1	3	574	126	53607	http://www.ebi.ac.uk/QuickGO/GTerm?id=GO:0019932	[]
7	6,7	positive regulation of microtubule polymerization or depolymerization	GO:0031112	0.154	0.285	0	0	0	0	Rac1|1	1	71	126	53607	http://www.ebi.ac.uk/QuickGO/GTerm?id=GO:0031112	[]
5	5	cell projection morphogenesis	GO:0048858	0.154	0.285	0	0	0	0	Ep300|1;Cyfip1|1;Rock2|1;Ppp3ca|1;Cnp|1;Rac1|1;Epb41l3|1	7	1877	126	53607	http://www.ebi.ac.uk/QuickGO/GTerm?id=GO:0048858	[]
5	5	positive regulation of cell projection organization	GO:0031346	0.154	0.285	0	0	0	0	Ep300|1;Negr1|1;Cyfip1|1;Rac1|1	4	881	126	53607	http://www.ebi.ac.uk/QuickGO/GTerm?id=GO:0031346	[]
4	3,4	positive regulation of cell adhesion	GO:0045785	0.155	0.287	0	0	0	0	Spta1|1;Rac1|1;Hspd1|1;Calr|1	4	883	126	53607	http://www.ebi.ac.uk/QuickGO/GTerm?id=GO:0045785	[]
6	6	metanephros morphogenesis	GO:0003338	0.156	0.288	0	0	0	0	Calb1|1	1	72	126	53607	http://www.ebi.ac.uk/QuickGO/GTerm?id=GO:0003338	[]
9	5,6,8,9	regulation of gene silencing by RNA	GO:0060966	0.156	0.288	0	0	0	0	Ppp3ca|1	1	72	126	53607	http://www.ebi.ac.uk/QuickGO/GTerm?id=GO:0060966	[]
9	5,6,8,9	regulation of posttranscriptional gene silencing	GO:0060147	0.156	0.288	0	0	0	0	Ppp3ca|1	1	72	126	53607	http://www.ebi.ac.uk/QuickGO/GTerm?id=GO:0060147	[]
9	7,9	regulation of calcium ion transport	GO:0051924	0.157	0.289	0	0	0	0	Dbi|1;Gnao1|1;Ywhae|1	3	580	126	53607	http://www.ebi.ac.uk/QuickGO/GTerm?id=GO:0051924	[]
4	4	maternal placenta development	GO:0001893	0.158	0.29	0	0	0	0	Prdx3|1	1	73	126	53607	http://www.ebi.ac.uk/QuickGO/GTerm?id=GO:0001893	[]
6	6	interferon-alpha production	GO:0032607	0.158	0.29	0	0	0	0	Hspd1|1	1	73	126	53607	http://www.ebi.ac.uk/QuickGO/GTerm?id=GO:0032607	[]
9	8,9	regulation of ARF protein signal transduction	GO:0032012	0.158	0.29	0	0	0	0	Psd3|1	1	73	126	53607	http://www.ebi.ac.uk/QuickGO/GTerm?id=GO:0032012	[]
8	5,6,7,8	regulation of meiotic nuclear division	GO:0040020	0.158	0.29	0	0	0	0	Calr|1	1	73	126	53607	http://www.ebi.ac.uk/QuickGO/GTerm?id=GO:0040020	[]
10	8,9,10	positive regulation of peptidyl-lysine acetylation	GO:2000758	0.158	0.29	0	0	0	0	Ep300|1	1	73	126	53607	http://www.ebi.ac.uk/QuickGO/GTerm?id=GO:2000758	[]
4	4	cell death	GO:0008219	0.159	0.292	0	0	0	0	Ywhaz|1;Ep300|1;Rock2|1;Ptges3|1;Dnajc5|1;Ndufc2|1;Prdx3|1;Anxa5|1;Pdk1|1;Pura|1;Anxa6|1;Hsp90ab1|1;Hspd1|1;Hspa9|1;Epb41l3|1	15	4810	126	53607	http://www.ebi.ac.uk/QuickGO/GTerm?id=GO:0008219	[]
10	7,8,10	regulation of neuron projection development	GO:0010975	0.159	0.292	0	0	0	0	Ep300|1;Negr1|1;Cyfip1|1;Ppp3ca|1;Rac1|1	5	1215	126	53607	http://www.ebi.ac.uk/QuickGO/GTerm?id=GO:0010975	[]
5	5	regulation of nervous system development	GO:0051960	0.159	0.292	0	0	0	0	Ep300|1;Ywhag|1;Negr1|1;Cyfip1|1;Idh2|1;Ppp3ca|1;Rac1|1;Calr|1	8	2244	126	53607	http://www.ebi.ac.uk/QuickGO/GTerm?id=GO:0051960	[]
8	7,8	axonogenesis	GO:0007409	0.159	0.292	0	0	0	0	Ep300|1;Cyfip1|1;Cnp|1;Hsp90ab1|1;Rac1|1	5	1216	126	53607	http://www.ebi.ac.uk/QuickGO/GTerm?id=GO:0007409	[]
7	5,6,7	negative regulation of extracellular matrix organization	GO:1903054	0.16	0.292	0	0	0	0	Spta1|1;Sptbn1|1	2	303	126	53607	http://www.ebi.ac.uk/QuickGO/GTerm?id=GO:1903054	[]
5	5	cellular response to nutrient	GO:0031670	0.16	0.292	0	0	0	0	Atp2b1|1	1	74	126	53607	http://www.ebi.ac.uk/QuickGO/GTerm?id=GO:0031670	[]
6	6	response to growth hormone	GO:0060416	0.16	0.292	0	0	0	0	Ass1|1	1	74	126	53607	http://www.ebi.ac.uk/QuickGO/GTerm?id=GO:0060416	[]
8	6,7,8	positive regulation of viral genome replication	GO:0045070	0.16	0.292	0	0	0	0	Pabpc1|1	1	74	126	53607	http://www.ebi.ac.uk/QuickGO/GTerm?id=GO:0045070	[]
8	7,8	auditory receptor cell development	GO:0060117	0.16	0.292	0	0	0	0	Rac1|1	1	74	126	53607	http://www.ebi.ac.uk/QuickGO/GTerm?id=GO:0060117	[]
5	5	establishment of vesicle localization	GO:0051650	0.16	0.292	0	0	0	0	Cyfip1|1;Sh3gl2|1;Amph|1	3	586	126	53607	http://www.ebi.ac.uk/QuickGO/GTerm?id=GO:0051650	[]
3	3	response to external stimulus	GO:0009605	0.161	0.293	0	0	0	0	Ldha|1;Ndufc2|1;Prdx3|1;Abat|1;Atp2b1|1;Eef2|1;Anxa5|1;Pdk1|1;Cnp|1;Acat1|1;Ass1|1;Slc1a2|1;Rac1|1;Hspd1|1;Slc12a2|1;Mdh1|1;Calr|1	17	5579	126	53607	http://www.ebi.ac.uk/QuickGO/GTerm?id=GO:0009605	[]
7	6,7	anion transmembrane transport	GO:0098656	0.161	0.293	0	0	0	0	Slc25a3|1;Slc1a2|1;Slc12a2|1	3	587	126	53607	http://www.ebi.ac.uk/QuickGO/GTerm?id=GO:0098656	[]
5	4,5	multicellular organism growth	GO:0035264	0.161	0.294	0	0	0	0	Gpd2|1;Slc1a2|1;Slc12a2|1	3	588	126	53607	http://www.ebi.ac.uk/QuickGO/GTerm?id=GO:0035264	[]
8	7,8	ARF protein signal transduction	GO:0032011	0.162	0.294	0	0	0	0	Psd3|1	1	75	126	53607	http://www.ebi.ac.uk/QuickGO/GTerm?id=GO:0032011	[]
8	5,6,7,8	regulation of platelet activation	GO:0010543	0.162	0.294	0	0	0	0	Abat|1	1	75	126	53607	http://www.ebi.ac.uk/QuickGO/GTerm?id=GO:0010543	[]
8	5,6,7,8	regulation of membrane repolarization	GO:0060306	0.162	0.294	0	0	0	0	Ywhae|1	1	75	126	53607	http://www.ebi.ac.uk/QuickGO/GTerm?id=GO:0060306	[]
5	5	sulfur compound catabolic process	GO:0044273	0.162	0.294	0	0	0	0	Acat1|1	1	75	126	53607	http://www.ebi.ac.uk/QuickGO/GTerm?id=GO:0044273	[]
10	8,9,10	nuclear-transcribed mRNA catabolic process, nonsense-mediated decay	GO:0000184	0.162	0.294	0	0	0	0	Pabpc1|1	1	75	126	53607	http://www.ebi.ac.uk/QuickGO/GTerm?id=GO:0000184	[]
4	4	response to fluid shear stress	GO:0034405	0.162	0.294	0	0	0	0	Ass1|1	1	75	126	53607	http://www.ebi.ac.uk/QuickGO/GTerm?id=GO:0034405	[]
6	6	smooth muscle contraction	GO:0006939	0.164	0.296	0	0	0	0	Rock2|1;Abat|1	2	308	126	53607	http://www.ebi.ac.uk/QuickGO/GTerm?id=GO:0006939	[]
6	5,6	regulation of long-term synaptic potentiation	GO:1900271	0.164	0.296	0	0	0	0	Calb1|1	1	76	126	53607	http://www.ebi.ac.uk/QuickGO/GTerm?id=GO:1900271	[]
8	7,8	dopamine transport	GO:0015872	0.164	0.296	0	0	0	0	Abat|1	1	76	126	53607	http://www.ebi.ac.uk/QuickGO/GTerm?id=GO:0015872	[]
5	4,5	positive regulation of epidermis development	GO:0045684	0.164	0.296	0	0	0	0	H2afy2|1	1	76	126	53607	http://www.ebi.ac.uk/QuickGO/GTerm?id=GO:0045684	[]
10	7,8,9,10	regulation of mRNA 3'-end processing	GO:0031440	0.164	0.296	0	0	0	0	Pabpc1|1	1	76	126	53607	http://www.ebi.ac.uk/QuickGO/GTerm?id=GO:0031440	[]
6	6	regulation of collagen biosynthetic process	GO:0032965	0.164	0.296	0	0	0	0	Ep300|1	1	76	126	53607	http://www.ebi.ac.uk/QuickGO/GTerm?id=GO:0032965	[]
9	6,7,8,9	branching involved in mammary gland duct morphogenesis	GO:0060444	0.164	0.296	0	0	0	0	Slc12a2|1	1	76	126	53607	http://www.ebi.ac.uk/QuickGO/GTerm?id=GO:0060444	[]
6	4,6	positive regulation of amine transport	GO:0051954	0.164	0.296	0	0	0	0	Abat|1	1	76	126	53607	http://www.ebi.ac.uk/QuickGO/GTerm?id=GO:0051954	[]
7	6,7	regulation of androgen receptor signaling pathway	GO:0060765	0.164	0.296	0	0	0	0	Ep300|1	1	76	126	53607	http://www.ebi.ac.uk/QuickGO/GTerm?id=GO:0060765	[]
5	4,5	regulation of cell-cell adhesion	GO:0022407	0.164	0.296	0	0	0	0	Spta1|1;Abat|1;Ass1|1;Hspd1|1	4	903	126	53607	http://www.ebi.ac.uk/QuickGO/GTerm?id=GO:0022407	[]
12	5,7,8,10,12	negative regulation of dendrite development	GO:2000171	0.166	0.299	0	0	0	0	Ppp3ca|1	1	77	126	53607	http://www.ebi.ac.uk/QuickGO/GTerm?id=GO:2000171	[]
4	4	positive regulation of multicellular organismal metabolic process	GO:0044253	0.166	0.299	0	0	0	0	Ep300|1	1	77	126	53607	http://www.ebi.ac.uk/QuickGO/GTerm?id=GO:0044253	[]
6	6	cellular response to reactive oxygen species	GO:0034614	0.166	0.3	0	0	0	0	Ep300|1;Prdx3|1	2	311	126	53607	http://www.ebi.ac.uk/QuickGO/GTerm?id=GO:0034614	[]
6	4,5,6	positive regulation of lipid metabolic process	GO:0045834	0.167	0.301	0	0	0	0	Dbi|1;Rac1|1	2	312	126	53607	http://www.ebi.ac.uk/QuickGO/GTerm?id=GO:0045834	[]
4	3,4	regulation of cell adhesion	GO:0030155	0.168	0.301	0	0	0	0	Spta1|1;Abat|1;Ass1|1;Rac1|1;Hspd1|1;Calr|1	6	1576	126	53607	http://www.ebi.ac.uk/QuickGO/GTerm?id=GO:0030155	[]
4	3,4	cell growth	GO:0016049	0.168	0.301	0	0	0	0	Ep300|1;Cyfip1|1;Hsp90ab1|1;Sh3gl2|1;Epb41l3|1	5	1238	126	53607	http://www.ebi.ac.uk/QuickGO/GTerm?id=GO:0016049	[]
7	7	hyaluronan metabolic process	GO:0030212	0.168	0.301	0	0	0	0	Cltc|1	1	78	126	53607	http://www.ebi.ac.uk/QuickGO/GTerm?id=GO:0030212	[]
7	6,7	positive regulation of nucleoside metabolic process	GO:0045979	0.168	0.301	0	0	0	0	Ndufc2|1	1	78	126	53607	http://www.ebi.ac.uk/QuickGO/GTerm?id=GO:0045979	[]
10	7,8,9,10	positive regulation of ATP metabolic process	GO:1903580	0.168	0.301	0	0	0	0	Ndufc2|1	1	78	126	53607	http://www.ebi.ac.uk/QuickGO/GTerm?id=GO:1903580	[]
6	4,5,6	positive regulation of cell junction assembly	GO:1901890	0.168	0.301	0	0	0	0	Rac1|1	1	78	126	53607	http://www.ebi.ac.uk/QuickGO/GTerm?id=GO:1901890	[]
6	6	epithelial cell migration	GO:0010631	0.169	0.302	0	0	0	0	Rock2|1;Atp5a1|1;Calr|1	3	601	126	53607	http://www.ebi.ac.uk/QuickGO/GTerm?id=GO:0010631	[]
5	5	negative regulation of cellular biosynthetic process	GO:0031327	0.169	0.302	0	0	0	0	Ywhaq|1;Cbx1|1;H2afz|1;Ep300|1;H2afj|1;Hmgn2|1;Hnrnpa2b1|1;Ppp3ca|1;Eno1|1;H2afy2|1;Pura|1;Basp1|1;Calr|1	13	4109	126	53607	http://www.ebi.ac.uk/QuickGO/GTerm?id=GO:0031327	[]
5	5	cell differentiation	GO:0030154	0.169	0.302	0	0	0	0	Ep300|1;Dbi|1;Ywhag|1;Hbb-b1|1;Cltc|1;Negr1|1;Cyfip1|1;Idh2|1;Rock2|1;Prdx3|1;Gnao1|1;Ppp3ca|1;Hba|1;Eef2|1;Ywhae|1;H2afy2|1;Syn1|1;Pura|1;Dld|1;Psd3|1;Cnp|1;Basp1|1;Hsp90ab1|1;Rac1|1;Sh3gl2|1;Hspa9|1;Epb41l3|1;Calr|1	28	9928	126	53607	http://www.ebi.ac.uk/QuickGO/GTerm?id=GO:0030154	[]
7	7	regulation of endopeptidase activity	GO:0052548	0.169	0.302	0	0	0	0	Ep300|1;Rock2|1;Prdx3|1;Hspd1|1	4	914	126	53607	http://www.ebi.ac.uk/QuickGO/GTerm?id=GO:0052548	[]
5	4,5	cell development	GO:0048468	0.169	0.303	0	0	0	0	Ep300|1;Ywhag|1;Hbb-b1|1;Negr1|1;Cyfip1|1;Idh2|1;Rock2|1;Gnao1|1;Ppp3ca|1;Hba|1;Syn1|1;Dld|1;Cnp|1;Hsp90ab1|1;Rac1|1;Sh3gl2|1;Epb41l3|1;Calr|1	18	6013	126	53607	http://www.ebi.ac.uk/QuickGO/GTerm?id=GO:0048468	[]
7	6,7	positive regulation of chromosome organization	GO:2001252	0.17	0.303	0	0	0	0	Ep300|1;Hnrnpa2b1|1	2	315	126	53607	http://www.ebi.ac.uk/QuickGO/GTerm?id=GO:2001252	[]
5	5	dopamine metabolic process	GO:0042417	0.17	0.303	0	0	0	0	Abat|1	1	79	126	53607	http://www.ebi.ac.uk/QuickGO/GTerm?id=GO:0042417	[]
11	8,10,11	MyD88-dependent toll-like receptor signaling pathway	GO:0002755	0.17	0.303	0	0	0	0	Hspd1|1	1	79	126	53607	http://www.ebi.ac.uk/QuickGO/GTerm?id=GO:0002755	[]
6	6	amyloid precursor protein catabolic process	GO:0042987	0.17	0.303	0	0	0	0	Rock2|1	1	79	126	53607	http://www.ebi.ac.uk/QuickGO/GTerm?id=GO:0042987	[]
12	11,12	intracellular pH reduction	GO:0051452	0.17	0.303	0	0	0	0	Atp6v0a1|1	1	79	126	53607	http://www.ebi.ac.uk/QuickGO/GTerm?id=GO:0051452	[]
10	6,7,8,10	positive regulation of neuron differentiation	GO:0045666	0.17	0.303	0	0	0	0	Ep300|1;Negr1|1;Cyfip1|1;Rac1|1	4	917	126	53607	http://www.ebi.ac.uk/QuickGO/GTerm?id=GO:0045666	[]
7	6,7	DNA biosynthetic process	GO:0071897	0.17	0.303	0	0	0	0	Ptges3|1;Hsp90ab1|1	2	316	126	53607	http://www.ebi.ac.uk/QuickGO/GTerm?id=GO:0071897	[]
4	4	regulation of biosynthetic process	GO:0009889	0.17	0.303	0	0	0	0	Ywhaq|1;Cbx1|1;H2afz|1;Ep300|1;Dbi|1;H2afj|1;Hbb-b1|1;Tfam|1;Hmgn2|1;Hnrnpa2b1|1;Cltc|1;Cyfip1|1;Taf6|1;Ptges3|1;Lrpprc|1;Ndufc2|1;Prdx3|1;Ube2o|1;Ppp3ca|1;Eef2|1;Pdk1|1;Eno1|1;Tceal3|1;H2afy2|1;Pura|1;Basp1|1;Hsp90ab1|1;Ass1|1;Rac1|1;Hspd1|1;Calr|1	31	11138	126	53607	http://www.ebi.ac.uk/QuickGO/GTerm?id=GO:0009889	[]
6	4,6	digestive tract development	GO:0048565	0.171	0.304	0	0	0	0	Ep300|1;Ass1|1	2	317	126	53607	http://www.ebi.ac.uk/QuickGO/GTerm?id=GO:0048565	[]
8	4,7,8	regulation of sequence-specific DNA binding transcription factor activity	GO:0051090	0.172	0.304	0	0	0	0	Ep300|1;Taf6|1;Prdx3|1;Ppp3ca|1	4	920	126	53607	http://www.ebi.ac.uk/QuickGO/GTerm?id=GO:0051090	[]
8	7,8	forebrain neuron development	GO:0021884	0.172	0.304	0	0	0	0	Rac1|1	1	80	126	53607	http://www.ebi.ac.uk/QuickGO/GTerm?id=GO:0021884	[]
6	6	response to zinc ion	GO:0010043	0.172	0.304	0	0	0	0	Ass1|1	1	80	126	53607	http://www.ebi.ac.uk/QuickGO/GTerm?id=GO:0010043	[]
8	6,7,8	regulation of amino acid transport	GO:0051955	0.172	0.304	0	0	0	0	Abat|1	1	80	126	53607	http://www.ebi.ac.uk/QuickGO/GTerm?id=GO:0051955	[]
7	6,7	epithelial cell differentiation involved in kidney development	GO:0035850	0.172	0.304	0	0	0	0	Basp1|1	1	80	126	53607	http://www.ebi.ac.uk/QuickGO/GTerm?id=GO:0035850	[]
4	4	exploration behavior	GO:0035640	0.172	0.304	0	0	0	0	Abat|1	1	80	126	53607	http://www.ebi.ac.uk/QuickGO/GTerm?id=GO:0035640	[]
7	5,7	regulation of hematopoietic progenitor cell differentiation	GO:1901532	0.172	0.304	0	0	0	0	Hspa9|1	1	80	126	53607	http://www.ebi.ac.uk/QuickGO/GTerm?id=GO:1901532	[]
6	6	endocytosis	GO:0006897	0.172	0.304	0	0	0	0	Cltc|1;Ppp3ca|1;Rac1|1;Sh3gl2|1;Amph|1;Calr|1	6	1589	126	53607	http://www.ebi.ac.uk/QuickGO/GTerm?id=GO:0006897	[]
7	5,6,7	negative regulation of intracellular steroid hormone receptor signaling pathway	GO:0033144	0.174	0.307	0	0	0	0	Calr|1	1	81	126	53607	http://www.ebi.ac.uk/QuickGO/GTerm?id=GO:0033144	[]
6	5,6	temperature homeostasis	GO:0001659	0.174	0.307	0	0	0	0	Abat|1	1	81	126	53607	http://www.ebi.ac.uk/QuickGO/GTerm?id=GO:0001659	[]
8	5,6,7,8	regulation of protein oligomerization	GO:0032459	0.174	0.307	0	0	0	0	Ep300|1	1	81	126	53607	http://www.ebi.ac.uk/QuickGO/GTerm?id=GO:0032459	[]
9	6,7,8,9	regulation of mRNA catabolic process	GO:0061013	0.174	0.307	0	0	0	0	Pabpc1|1	1	81	126	53607	http://www.ebi.ac.uk/QuickGO/GTerm?id=GO:0061013	[]
4	4	cell junction organization	GO:0034330	0.174	0.307	0	0	0	0	Rock2|1;Rac1|1;Epb41l3|1	3	610	126	53607	http://www.ebi.ac.uk/QuickGO/GTerm?id=GO:0034330	[]
5	5	epithelium migration	GO:0090132	0.174	0.307	0	0	0	0	Rock2|1;Atp5a1|1;Calr|1	3	610	126	53607	http://www.ebi.ac.uk/QuickGO/GTerm?id=GO:0090132	[]
5	5	Golgi organization	GO:0007030	0.175	0.308	0	0	0	0	Ywhaz|1;Cltc|1	2	321	126	53607	http://www.ebi.ac.uk/QuickGO/GTerm?id=GO:0007030	[]
6	5,6	import across plasma membrane	GO:0098739	0.176	0.309	0	0	0	0	Slc1a2|1	1	82	126	53607	http://www.ebi.ac.uk/QuickGO/GTerm?id=GO:0098739	[]
8	6,7,8	modulation by host of viral transcription	GO:0043921	0.176	0.309	0	0	0	0	Ep300|1	1	82	126	53607	http://www.ebi.ac.uk/QuickGO/GTerm?id=GO:0043921	[]
7	6,7	modulation by host of symbiont transcription	GO:0052472	0.176	0.309	0	0	0	0	Ep300|1	1	82	126	53607	http://www.ebi.ac.uk/QuickGO/GTerm?id=GO:0052472	[]
10	7,9,10	Wnt signaling pathway, planar cell polarity pathway	GO:0060071	0.176	0.309	0	0	0	0	Rac1|1	1	82	126	53607	http://www.ebi.ac.uk/QuickGO/GTerm?id=GO:0060071	[]
11	7,8,10,11	regulation of actin nucleation	GO:0051125	0.176	0.309	0	0	0	0	Cyfip1|1	1	82	126	53607	http://www.ebi.ac.uk/QuickGO/GTerm?id=GO:0051125	[]
6	5,6	cell part morphogenesis	GO:0032990	0.177	0.311	0	0	0	0	Ep300|1;Cyfip1|1;Rock2|1;Ppp3ca|1;Cnp|1;Rac1|1;Epb41l3|1	7	1953	126	53607	http://www.ebi.ac.uk/QuickGO/GTerm?id=GO:0032990	[]
7	7	N-terminal protein amino acid modification	GO:0031365	0.178	0.311	0	0	0	0	Ep300|1	1	83	126	53607	http://www.ebi.ac.uk/QuickGO/GTerm?id=GO:0031365	[]
7	7	acute-phase response	GO:0006953	0.178	0.311	0	0	0	0	Ass1|1	1	83	126	53607	http://www.ebi.ac.uk/QuickGO/GTerm?id=GO:0006953	[]
5	5	cellular response to toxic substance	GO:0097237	0.178	0.311	0	0	0	0	Ep300|1	1	83	126	53607	http://www.ebi.ac.uk/QuickGO/GTerm?id=GO:0097237	[]
9	6,7,8,9	positive regulation of BMP signaling pathway	GO:0030513	0.178	0.311	0	0	0	0	Ube2o|1	1	83	126	53607	http://www.ebi.ac.uk/QuickGO/GTerm?id=GO:0030513	[]
6	6	modulation of transcription in other organism involved in symbiotic interaction	GO:0052312	0.178	0.311	0	0	0	0	Ep300|1	1	83	126	53607	http://www.ebi.ac.uk/QuickGO/GTerm?id=GO:0052312	[]
5	5	organic cyclic compound catabolic process	GO:1901361	0.178	0.312	0	0	0	0	Pabpc1|1;Lrpprc|1;Aldh1l1|1;Cnp|1	4	934	126	53607	http://www.ebi.ac.uk/QuickGO/GTerm?id=GO:1901361	[]
6	4,5,6	positive regulation of endocytosis	GO:0045807	0.179	0.313	0	0	0	0	Ppp3ca|1;Calr|1	2	326	126	53607	http://www.ebi.ac.uk/QuickGO/GTerm?id=GO:0045807	[]
9	5,6,7,8,9	positive regulation of protein polymerization	GO:0032273	0.179	0.313	0	0	0	0	Cyfip1|1;Rac1|1	2	326	126	53607	http://www.ebi.ac.uk/QuickGO/GTerm?id=GO:0032273	[]
7	5,7	skeletal muscle adaptation	GO:0043501	0.179	0.313	0	0	0	0	Ppp3ca|1	1	84	126	53607	http://www.ebi.ac.uk/QuickGO/GTerm?id=GO:0043501	[]
8	8	L-alpha-amino acid transmembrane transport	GO:1902475	0.179	0.313	0	0	0	0	Slc1a2|1	1	84	126	53607	http://www.ebi.ac.uk/QuickGO/GTerm?id=GO:1902475	[]
6	6	regulation of polysaccharide biosynthetic process	GO:0032885	0.179	0.313	0	0	0	0	Cltc|1	1	84	126	53607	http://www.ebi.ac.uk/QuickGO/GTerm?id=GO:0032885	[]
5	5	protein-lipid complex subunit organization	GO:0071825	0.179	0.313	0	0	0	0	Sh3gl2|1	1	84	126	53607	http://www.ebi.ac.uk/QuickGO/GTerm?id=GO:0071825	[]
7	7	neutral amino acid transport	GO:0015804	0.179	0.313	0	0	0	0	Slc32a1|1	1	84	126	53607	http://www.ebi.ac.uk/QuickGO/GTerm?id=GO:0015804	[]
4	4	metencephalon development	GO:0022037	0.18	0.314	0	0	0	0	Glud1|1;Abat|1	2	328	126	53607	http://www.ebi.ac.uk/QuickGO/GTerm?id=GO:0022037	[]
6	6	regulation of phosphatase activity	GO:0010921	0.18	0.314	0	0	0	0	Rock2|1;Hsp90ab1|1	2	328	126	53607	http://www.ebi.ac.uk/QuickGO/GTerm?id=GO:0010921	[]
3	3	immune system development	GO:0002520	0.181	0.314	0	0	0	0	Ep300|1;Spta1|1;Hbb-b1|1;Prdx3|1;Hba|1;Eef2|1;Hspd1|1;Hspa9|1	8	2321	126	53607	http://www.ebi.ac.uk/QuickGO/GTerm?id=GO:0002520	[]
7	3,6,7	negative regulation of cellular protein localization	GO:1903828	0.181	0.315	0	0	0	0	Cltc|1;Lypla1|1	2	329	126	53607	http://www.ebi.ac.uk/QuickGO/GTerm?id=GO:1903828	[]
5	5	regulation of postsynaptic membrane potential	GO:0060078	0.181	0.315	0	0	0	0	Ppp3ca|1;Abat|1	2	329	126	53607	http://www.ebi.ac.uk/QuickGO/GTerm?id=GO:0060078	[]
6	5,6	positive regulation of interleukin-2 production	GO:0032743	0.181	0.315	0	0	0	0	Sptbn1|1	1	85	126	53607	http://www.ebi.ac.uk/QuickGO/GTerm?id=GO:0032743	[]
8	8	skeletal muscle fiber development	GO:0048741	0.181	0.315	0	0	0	0	Ppp3ca|1	1	85	126	53607	http://www.ebi.ac.uk/QuickGO/GTerm?id=GO:0048741	[]
5	5	regulation of response to wounding	GO:1903034	0.182	0.315	0	0	0	0	Ndufc2|1;Abat|1;Anxa5|1;Hspd1|1	4	942	126	53607	http://www.ebi.ac.uk/QuickGO/GTerm?id=GO:1903034	[]
4	4	tissue migration	GO:0090130	0.182	0.315	0	0	0	0	Rock2|1;Atp5a1|1;Calr|1	3	624	126	53607	http://www.ebi.ac.uk/QuickGO/GTerm?id=GO:0090130	[]
6	5,6	negative regulation of cellular protein metabolic process	GO:0032269	0.182	0.315	0	0	0	0	Ep300|1;Hnrnpa2b1|1;Rock2|1;Prdx3|1;Ppp3ca|1;Ywhae|1;Pura|1;Hsp90ab1|1;Calr|1	9	2688	126	53607	http://www.ebi.ac.uk/QuickGO/GTerm?id=GO:0032269	[]
7	5,6,7	regulation of viral life cycle	GO:1903900	0.182	0.315	0	0	0	0	Pabpc1|1;Ep300|1	2	330	126	53607	http://www.ebi.ac.uk/QuickGO/GTerm?id=GO:1903900	[]
4	4	regulation of cellular response to growth factor stimulus	GO:0090287	0.182	0.316	0	0	0	0	Cyfip1|1;Ube2o|1;Hsp90ab1|1	3	625	126	53607	http://www.ebi.ac.uk/QuickGO/GTerm?id=GO:0090287	[]
5	5	sphingolipid metabolic process	GO:0006665	0.183	0.316	0	0	0	0	Aldh5a1|1;Sptlc3|1	2	331	126	53607	http://www.ebi.ac.uk/QuickGO/GTerm?id=GO:0006665	[]
5	5	regulation of epithelial cell differentiation	GO:0030856	0.183	0.316	0	0	0	0	Rock2|1;H2afy2|1	2	331	126	53607	http://www.ebi.ac.uk/QuickGO/GTerm?id=GO:0030856	[]
7	7	glucose homeostasis	GO:0042593	0.183	0.316	0	0	0	0	Ep300|1;Ppp3ca|1;Vsnl1|1	3	626	126	53607	http://www.ebi.ac.uk/QuickGO/GTerm?id=GO:0042593	[]
5	5	protein destabilization	GO:0031648	0.183	0.316	0	0	0	0	Ep300|1	1	86	126	53607	http://www.ebi.ac.uk/QuickGO/GTerm?id=GO:0031648	[]
9	5,7,8,9	positive regulation of release of sequestered calcium ion into cytosol	GO:0051281	0.183	0.316	0	0	0	0	Dbi|1	1	86	126	53607	http://www.ebi.ac.uk/QuickGO/GTerm?id=GO:0051281	[]
6	5,6	detection of mechanical stimulus involved in sensory perception	GO:0050974	0.183	0.316	0	0	0	0	Slc12a2|1	1	86	126	53607	http://www.ebi.ac.uk/QuickGO/GTerm?id=GO:0050974	[]
4	4	organelle localization	GO:0051640	0.184	0.317	0	0	0	0	Ywhaz|1;Cyfip1|1;Syn1|1;Sh3gl2|1;Amph|1	5	1280	126	53607	http://www.ebi.ac.uk/QuickGO/GTerm?id=GO:0051640	[]
6	6	carbohydrate homeostasis	GO:0033500	0.184	0.317	0	0	0	0	Ep300|1;Ppp3ca|1;Vsnl1|1	3	628	126	53607	http://www.ebi.ac.uk/QuickGO/GTerm?id=GO:0033500	[]
7	7	cellular response to interleukin-4	GO:0071353	0.185	0.318	0	0	0	0	Hsp90ab1|1	1	87	126	53607	http://www.ebi.ac.uk/QuickGO/GTerm?id=GO:0071353	[]
6	5,6	regulation of collagen metabolic process	GO:0010712	0.185	0.318	0	0	0	0	Ep300|1	1	87	126	53607	http://www.ebi.ac.uk/QuickGO/GTerm?id=GO:0010712	[]
4	4	olfactory bulb development	GO:0021772	0.185	0.318	0	0	0	0	Rac1|1	1	87	126	53607	http://www.ebi.ac.uk/QuickGO/GTerm?id=GO:0021772	[]
4	4	heme metabolic process	GO:0042168	0.185	0.318	0	0	0	0	Iba57|1	1	87	126	53607	http://www.ebi.ac.uk/QuickGO/GTerm?id=GO:0042168	[]
6	6	negative regulation of endothelial cell proliferation	GO:0001937	0.185	0.318	0	0	0	0	Atp5a1|1	1	87	126	53607	http://www.ebi.ac.uk/QuickGO/GTerm?id=GO:0001937	[]
8	6,7,8	protein transmembrane import into intracellular organelle	GO:0044743	0.185	0.318	0	0	0	0	Hspd1|1	1	87	126	53607	http://www.ebi.ac.uk/QuickGO/GTerm?id=GO:0044743	[]
3	3	negative regulation of multicellular organismal process	GO:0051241	0.186	0.319	0	0	0	0	Idh2|1;Rock2|1;Ppp3ca|1;Abat|1;Anxa5|1;Hsp90ab1|1;Rac1|1;Hspa9|1;Calr|1	9	2703	126	53607	http://www.ebi.ac.uk/QuickGO/GTerm?id=GO:0051241	[]
8	7,8	axon development	GO:0061564	0.187	0.32	0	0	0	0	Ep300|1;Cyfip1|1;Cnp|1;Hsp90ab1|1;Rac1|1	5	1287	126	53607	http://www.ebi.ac.uk/QuickGO/GTerm?id=GO:0061564	[]
5	5	positive regulation of cellular catabolic process	GO:0031331	0.187	0.32	0	0	0	0	Pabpc1|1;Anxa5|1;Pdk1|1;Mdh1|1	4	953	126	53607	http://www.ebi.ac.uk/QuickGO/GTerm?id=GO:0031331	[]
6	5,6	regulation of macrophage activation	GO:0043030	0.187	0.32	0	0	0	0	Hspd1|1	1	88	126	53607	http://www.ebi.ac.uk/QuickGO/GTerm?id=GO:0043030	[]
6	5,6	bone cell development	GO:0098751	0.187	0.32	0	0	0	0	Ep300|1	1	88	126	53607	http://www.ebi.ac.uk/QuickGO/GTerm?id=GO:0098751	[]
11	6,7,9,10,11	positive regulation of cyclin-dependent protein kinase activity	GO:1904031	0.187	0.32	0	0	0	0	Hsp90ab1|1	1	88	126	53607	http://www.ebi.ac.uk/QuickGO/GTerm?id=GO:1904031	[]
4	4	positive regulation of muscle contraction	GO:0045933	0.187	0.32	0	0	0	0	Abat|1	1	88	126	53607	http://www.ebi.ac.uk/QuickGO/GTerm?id=GO:0045933	[]
6	5,6	cell volume homeostasis	GO:0006884	0.187	0.32	0	0	0	0	Slc12a2|1	1	88	126	53607	http://www.ebi.ac.uk/QuickGO/GTerm?id=GO:0006884	[]
9	9	neuron-neuron synaptic transmission	GO:0007270	0.188	0.321	0	0	0	0	Dbi|1;Rac1|1	2	337	126	53607	http://www.ebi.ac.uk/QuickGO/GTerm?id=GO:0007270	[]
10	6,7,8,9,10	positive regulation of mRNA processing	GO:0050685	0.189	0.322	0	0	0	0	Pabpc1|1	1	89	126	53607	http://www.ebi.ac.uk/QuickGO/GTerm?id=GO:0050685	[]
7	7	retrograde vesicle-mediated transport, Golgi to ER	GO:0006890	0.189	0.322	0	0	0	0	Copa|1	1	89	126	53607	http://www.ebi.ac.uk/QuickGO/GTerm?id=GO:0006890	[]
11	7,8,9,10,11	negative regulation of mRNA splicing, via spliceosome	GO:0048025	0.189	0.322	0	0	0	0	Hnrnpa2b1|1	1	89	126	53607	http://www.ebi.ac.uk/QuickGO/GTerm?id=GO:0048025	[]
4	4	mating	GO:0007618	0.189	0.322	0	0	0	0	Abat|1	1	89	126	53607	http://www.ebi.ac.uk/QuickGO/GTerm?id=GO:0007618	[]
7	5,7	chromatin assembly or disassembly	GO:0006333	0.19	0.323	0	0	0	0	H3f3c|1;H2afy2|1	2	339	126	53607	http://www.ebi.ac.uk/QuickGO/GTerm?id=GO:0006333	[]
7	5,7	regulation of neutrophil migration	GO:1902622	0.191	0.325	0	0	0	0	Rac1|1	1	90	126	53607	http://www.ebi.ac.uk/QuickGO/GTerm?id=GO:1902622	[]
5	4,5	olfactory lobe development	GO:0021988	0.191	0.325	0	0	0	0	Rac1|1	1	90	126	53607	http://www.ebi.ac.uk/QuickGO/GTerm?id=GO:0021988	[]
4	4	cerebral cortex development	GO:0021987	0.191	0.325	0	0	0	0	Ywhae|1;Rac1|1	2	341	126	53607	http://www.ebi.ac.uk/QuickGO/GTerm?id=GO:0021987	[]
7	6,7	adenylate cyclase-modulating G-protein coupled receptor signaling pathway	GO:0007188	0.191	0.325	0	0	0	0	Gnao1|1;Gnai1|1	2	341	126	53607	http://www.ebi.ac.uk/QuickGO/GTerm?id=GO:0007188	[]
9	5,6,7,8,9	regulation of telomere maintenance via telomere lengthening	GO:1904356	0.193	0.327	0	0	0	0	Hnrnpa2b1|1	1	91	126	53607	http://www.ebi.ac.uk/QuickGO/GTerm?id=GO:1904356	[]
7	6,7	regulation of fibroblast migration	GO:0010762	0.193	0.327	0	0	0	0	Rac1|1	1	91	126	53607	http://www.ebi.ac.uk/QuickGO/GTerm?id=GO:0010762	[]
9	6,8,9	regulation of establishment of planar polarity	GO:0090175	0.193	0.327	0	0	0	0	Rac1|1	1	91	126	53607	http://www.ebi.ac.uk/QuickGO/GTerm?id=GO:0090175	[]
4	4	one-carbon metabolic process	GO:0006730	0.193	0.327	0	0	0	0	Aldh1l1|1	1	91	126	53607	http://www.ebi.ac.uk/QuickGO/GTerm?id=GO:0006730	[]
6	6	regulation of wound healing	GO:0061041	0.193	0.327	0	0	0	0	Abat|1;Anxa5|1	2	343	126	53607	http://www.ebi.ac.uk/QuickGO/GTerm?id=GO:0061041	[]
5	5	phosphatidylcholine metabolic process	GO:0046470	0.195	0.329	0	0	0	0	Dbi|1	1	92	126	53607	http://www.ebi.ac.uk/QuickGO/GTerm?id=GO:0046470	[]
6	6	amyloid-beta metabolic process	GO:0050435	0.195	0.329	0	0	0	0	Rock2|1	1	92	126	53607	http://www.ebi.ac.uk/QuickGO/GTerm?id=GO:0050435	[]
6	5,6	regulation of cellular amine metabolic process	GO:0033238	0.195	0.329	0	0	0	0	Abat|1	1	92	126	53607	http://www.ebi.ac.uk/QuickGO/GTerm?id=GO:0033238	[]
6	5,6	regulation of cellular ketone metabolic process	GO:0010565	0.195	0.329	0	0	0	0	Dbi|1;Pdk1|1	2	345	126	53607	http://www.ebi.ac.uk/QuickGO/GTerm?id=GO:0010565	[]
11	6,7,9,10,11	positive regulation of transcription factor import into nucleus	GO:0042993	0.197	0.332	0	0	0	0	Ppp3ca|1	1	93	126	53607	http://www.ebi.ac.uk/QuickGO/GTerm?id=GO:0042993	[]
7	5,6,7	negative regulation of retinoic acid receptor signaling pathway	GO:0048387	0.197	0.332	0	0	0	0	Calr|1	1	93	126	53607	http://www.ebi.ac.uk/QuickGO/GTerm?id=GO:0048387	[]
7	5,6,7	mast cell degranulation	GO:0043303	0.197	0.332	0	0	0	0	Ywhaz|1	1	93	126	53607	http://www.ebi.ac.uk/QuickGO/GTerm?id=GO:0043303	[]
6	6	mast cell mediated immunity	GO:0002448	0.199	0.334	0	0	0	0	Ywhaz|1	1	94	126	53607	http://www.ebi.ac.uk/QuickGO/GTerm?id=GO:0002448	[]
7	6,7	regulation of cAMP-mediated signaling	GO:0043949	0.199	0.334	0	0	0	0	Gnai1|1	1	94	126	53607	http://www.ebi.ac.uk/QuickGO/GTerm?id=GO:0043949	[]
5	5	multicellular organism aging	GO:0010259	0.199	0.334	0	0	0	0	Slc1a2|1	1	94	126	53607	http://www.ebi.ac.uk/QuickGO/GTerm?id=GO:0010259	[]
6	6	mast cell activation involved in immune response	GO:0002279	0.199	0.334	0	0	0	0	Ywhaz|1	1	94	126	53607	http://www.ebi.ac.uk/QuickGO/GTerm?id=GO:0002279	[]
6	6	regulation of catecholamine secretion	GO:0050433	0.199	0.334	0	0	0	0	Abat|1	1	94	126	53607	http://www.ebi.ac.uk/QuickGO/GTerm?id=GO:0050433	[]
6	6	Golgi vesicle transport	GO:0048193	0.199	0.335	0	0	0	0	Lypla1|1;Sptbn1|1;Copa|1	3	653	126	53607	http://www.ebi.ac.uk/QuickGO/GTerm?id=GO:0048193	[]
5	4,5	intracellular receptor signaling pathway	GO:0030522	0.2	0.336	0	0	0	0	Ep300|1;Ptges3|1;Calr|1	3	654	126	53607	http://www.ebi.ac.uk/QuickGO/GTerm?id=GO:0030522	[]
6	5,6	dopamine receptor signaling pathway	GO:0007212	0.2	0.336	0	0	0	0	Gnao1|1	1	95	126	53607	http://www.ebi.ac.uk/QuickGO/GTerm?id=GO:0007212	[]
5	5	collagen biosynthetic process	GO:0032964	0.2	0.336	0	0	0	0	Ep300|1	1	95	126	53607	http://www.ebi.ac.uk/QuickGO/GTerm?id=GO:0032964	[]
7	6,7	apoptotic cell clearance	GO:0043277	0.2	0.336	0	0	0	0	Rac1|1	1	95	126	53607	http://www.ebi.ac.uk/QuickGO/GTerm?id=GO:0043277	[]
6	5,6	regulation of centrosome duplication	GO:0010824	0.2	0.336	0	0	0	0	Rock2|1	1	95	126	53607	http://www.ebi.ac.uk/QuickGO/GTerm?id=GO:0010824	[]
7	5,7	chromatin modification	GO:0016568	0.201	0.336	0	0	0	0	Ep300|1;Tfam|1;Jade3|1;H2afy2|1;Top1|1	5	1321	126	53607	http://www.ebi.ac.uk/QuickGO/GTerm?id=GO:0016568	[]
8	7,8	protein targeting to plasma membrane	GO:0072661	0.202	0.338	0	0	0	0	Sptbn1|1	1	96	126	53607	http://www.ebi.ac.uk/QuickGO/GTerm?id=GO:0072661	[]
9	7,8,9	positive regulation of protein acetylation	GO:1901985	0.202	0.338	0	0	0	0	Ep300|1	1	96	126	53607	http://www.ebi.ac.uk/QuickGO/GTerm?id=GO:1901985	[]
7	5,7	negative regulation of blood pressure	GO:0045776	0.202	0.338	0	0	0	0	Abat|1	1	96	126	53607	http://www.ebi.ac.uk/QuickGO/GTerm?id=GO:0045776	[]
9	6,7,8,9	positive regulation of calcium ion import	GO:0090280	0.202	0.338	0	0	0	0	Dbi|1	1	96	126	53607	http://www.ebi.ac.uk/QuickGO/GTerm?id=GO:0090280	[]
10	7,8,10	regulation of phosphatidylinositol 3-kinase activity	GO:0043551	0.202	0.338	0	0	0	0	Rac1|1	1	96	126	53607	http://www.ebi.ac.uk/QuickGO/GTerm?id=GO:0043551	[]
6	6	response to interleukin-4	GO:0070670	0.202	0.338	0	0	0	0	Hsp90ab1|1	1	96	126	53607	http://www.ebi.ac.uk/QuickGO/GTerm?id=GO:0070670	[]
6	5,6	G-protein coupled receptor signaling pathway, coupled to cyclic nucleotide second messenger	GO:0007187	0.202	0.338	0	0	0	0	Gnao1|1;Gnai1|1	2	354	126	53607	http://www.ebi.ac.uk/QuickGO/GTerm?id=GO:0007187	[]
5	4,5	negative regulation of cell death	GO:0060548	0.203	0.339	0	0	0	0	Ep300|1;Ptges3|1;Dnajc5|1;Ndufc2|1;Prdx3|1;Hsp90ab1|1;Hspd1|1;Hspa9|1	8	2397	126	53607	http://www.ebi.ac.uk/QuickGO/GTerm?id=GO:0060548	[]
5	5	digestive system development	GO:0055123	0.203	0.339	0	0	0	0	Ep300|1;Ass1|1	2	355	126	53607	http://www.ebi.ac.uk/QuickGO/GTerm?id=GO:0055123	[]
7	6,7	positive regulation of fibril organization	GO:1902905	0.203	0.339	0	0	0	0	Cyfip1|1;Rac1|1	2	355	126	53607	http://www.ebi.ac.uk/QuickGO/GTerm?id=GO:1902905	[]
8	8	positive regulation of endopeptidase activity	GO:0010950	0.203	0.339	0	0	0	0	Rock2|1;Hspd1|1	2	355	126	53607	http://www.ebi.ac.uk/QuickGO/GTerm?id=GO:0010950	[]
3	3	positive regulation of multi-organism process	GO:0043902	0.204	0.339	0	0	0	0	Pabpc1|1;Ep300|1	2	356	126	53607	http://www.ebi.ac.uk/QuickGO/GTerm?id=GO:0043902	[]
6	5,6	regulation of interleukin-10 production	GO:0032653	0.204	0.339	0	0	0	0	Hspd1|1	1	97	126	53607	http://www.ebi.ac.uk/QuickGO/GTerm?id=GO:0032653	[]
6	5,6	regulation of receptor internalization	GO:0002090	0.204	0.339	0	0	0	0	Sh3gl2|1	1	97	126	53607	http://www.ebi.ac.uk/QuickGO/GTerm?id=GO:0002090	[]
7	5,6,7	membrane repolarization	GO:0086009	0.204	0.339	0	0	0	0	Ywhae|1	1	97	126	53607	http://www.ebi.ac.uk/QuickGO/GTerm?id=GO:0086009	[]
4	4	response to electrical stimulus	GO:0051602	0.204	0.339	0	0	0	0	Cyfip1|1	1	97	126	53607	http://www.ebi.ac.uk/QuickGO/GTerm?id=GO:0051602	[]
7	6,7	response to nicotine	GO:0035094	0.204	0.339	0	0	0	0	Abat|1	1	97	126	53607	http://www.ebi.ac.uk/QuickGO/GTerm?id=GO:0035094	[]
3	3	positive regulation of multicellular organismal process	GO:0051240	0.205	0.34	0	0	0	0	Ep300|1;Negr1|1;Cyfip1|1;Rock2|1;Sptbn1|1;Ppp3ca|1;Abat|1;H2afy2|1;Atp5a1|1;Rac1|1;Hspd1|1;Calr|1	12	3895	126	53607	http://www.ebi.ac.uk/QuickGO/GTerm?id=GO:0051240	[]
8	7,8	RNA splicing	GO:0008380	0.205	0.34	0	0	0	0	Pabpc1|1;Hnrnpa1|1;Hnrnpa2b1|1;Hnrnpm|1	4	991	126	53607	http://www.ebi.ac.uk/QuickGO/GTerm?id=GO:0008380	[]
6	5,6	establishment of protein localization to membrane	GO:0090150	0.206	0.341	0	0	0	0	Rock2|1;Lypla1|1;Sptbn1|1	3	664	126	53607	http://www.ebi.ac.uk/QuickGO/GTerm?id=GO:0090150	[]
9	7,8,9	establishment of endothelial barrier	GO:0061028	0.206	0.341	0	0	0	0	Rock2|1	1	98	126	53607	http://www.ebi.ac.uk/QuickGO/GTerm?id=GO:0061028	[]
9	6,7,8,9	glycogen biosynthetic process	GO:0005978	0.206	0.341	0	0	0	0	Ptges3|1	1	98	126	53607	http://www.ebi.ac.uk/QuickGO/GTerm?id=GO:0005978	[]
8	6,7,8	glucan biosynthetic process	GO:0009250	0.206	0.341	0	0	0	0	Ptges3|1	1	98	126	53607	http://www.ebi.ac.uk/QuickGO/GTerm?id=GO:0009250	[]
9	7,8,9	regulation of calcineurin-NFAT signaling cascade	GO:0070884	0.206	0.341	0	0	0	0	Ppp3ca|1	1	98	126	53607	http://www.ebi.ac.uk/QuickGO/GTerm?id=GO:0070884	[]
5	5	hydrogen peroxide metabolic process	GO:0042743	0.206	0.341	0	0	0	0	Prdx3|1	1	98	126	53607	http://www.ebi.ac.uk/QuickGO/GTerm?id=GO:0042743	[]
6	5,6	cell differentiation involved in kidney development	GO:0061005	0.208	0.342	0	0	0	0	Basp1|1	1	99	126	53607	http://www.ebi.ac.uk/QuickGO/GTerm?id=GO:0061005	[]
6	4,5,6	regulation of erythrocyte differentiation	GO:0045646	0.208	0.342	0	0	0	0	Hspa9|1	1	99	126	53607	http://www.ebi.ac.uk/QuickGO/GTerm?id=GO:0045646	[]
8	6,7,8	negative regulation of RNA splicing	GO:0033119	0.208	0.342	0	0	0	0	Hnrnpa2b1|1	1	99	126	53607	http://www.ebi.ac.uk/QuickGO/GTerm?id=GO:0033119	[]
10	10	pH reduction	GO:0045851	0.208	0.342	0	0	0	0	Atp6v0a1|1	1	99	126	53607	http://www.ebi.ac.uk/QuickGO/GTerm?id=GO:0045851	[]
7	7	intra-Golgi vesicle-mediated transport	GO:0006891	0.208	0.342	0	0	0	0	Copa|1	1	99	126	53607	http://www.ebi.ac.uk/QuickGO/GTerm?id=GO:0006891	[]
6	6	serine family amino acid metabolic process	GO:0009069	0.208	0.342	0	0	0	0	Psat1|1	1	99	126	53607	http://www.ebi.ac.uk/QuickGO/GTerm?id=GO:0009069	[]
6	5,6	regulation of polysaccharide metabolic process	GO:0032881	0.21	0.345	0	0	0	0	Cltc|1	1	100	126	53607	http://www.ebi.ac.uk/QuickGO/GTerm?id=GO:0032881	[]
7	7	positive regulation of T cell mediated immunity	GO:0002711	0.21	0.345	0	0	0	0	Hspd1|1	1	100	126	53607	http://www.ebi.ac.uk/QuickGO/GTerm?id=GO:0002711	[]
5	5	muscle organ development	GO:0007517	0.21	0.345	0	0	0	0	Ep300|1;Ppp3ca|1;Eef2|1;Ass1|1	4	1001	126	53607	http://www.ebi.ac.uk/QuickGO/GTerm?id=GO:0007517	[]
6	5,6	negative regulation of cell-cell adhesion	GO:0022408	0.21	0.345	0	0	0	0	Abat|1;Ass1|1	2	363	126	53607	http://www.ebi.ac.uk/QuickGO/GTerm?id=GO:0022408	[]
6	6	regulation of peptidase activity	GO:0052547	0.211	0.346	0	0	0	0	Ep300|1;Rock2|1;Prdx3|1;Hspd1|1	4	1002	126	53607	http://www.ebi.ac.uk/QuickGO/GTerm?id=GO:0052547	[]
6	5,6	membrane assembly	GO:0071709	0.212	0.347	0	0	0	0	Sptbn1|1	1	101	126	53607	http://www.ebi.ac.uk/QuickGO/GTerm?id=GO:0071709	[]
7	7	megakaryocyte differentiation	GO:0030219	0.212	0.347	0	0	0	0	Ep300|1	1	101	126	53607	http://www.ebi.ac.uk/QuickGO/GTerm?id=GO:0030219	[]
8	7,8	myotube cell development	GO:0014904	0.212	0.347	0	0	0	0	Ppp3ca|1	1	101	126	53607	http://www.ebi.ac.uk/QuickGO/GTerm?id=GO:0014904	[]
5	4,5	cell cycle arrest	GO:0007050	0.212	0.347	0	0	0	0	Hsp90ab1|1;Calr|1	2	365	126	53607	http://www.ebi.ac.uk/QuickGO/GTerm?id=GO:0007050	[]
4	4	regulation of nitrogen compound metabolic process	GO:0051171	0.213	0.348	0	0	0	0	Ywhaq|1;Cbx1|1;Pabpc1|1;H2afz|1;Ep300|1;H2afj|1;Hbb-b1|1;Tfam|1;Hmgn2|1;Hnrnpa2b1|1;Cltc|1;Cyfip1|1;Rock2|1;Taf6|1;Ptges3|1;Lrpprc|1;Ndufc2|1;Prdx3|1;Ube2o|1;Ppp3ca|1;Abat|1;Eef2|1;Eno1|1;Tceal3|1;H2afy2|1;Pura|1;Basp1|1;Hsp90ab1|1;Ass1|1;Rac1|1;Calr|1	31	11433	126	53607	http://www.ebi.ac.uk/QuickGO/GTerm?id=GO:0051171	[]
9	6,7,8,9	regulation of mRNA processing	GO:0050684	0.213	0.348	0	0	0	0	Pabpc1|1;Hnrnpa2b1|1	2	366	126	53607	http://www.ebi.ac.uk/QuickGO/GTerm?id=GO:0050684	[]
8	4,5,6,8	regulation of defense response to virus	GO:0050688	0.214	0.349	0	0	0	0	Anxa5|1;Mdh1|1	2	367	126	53607	http://www.ebi.ac.uk/QuickGO/GTerm?id=GO:0050688	[]
10	9,10	RNA splicing, via transesterification reactions with bulged adenosine as nucleophile	GO:0000377	0.215	0.351	0	0	0	0	Hnrnpa1|1;Hnrnpa2b1|1;Hnrnpm|1	3	679	126	53607	http://www.ebi.ac.uk/QuickGO/GTerm?id=GO:0000377	[]
11	8,9,10,11	mRNA splicing, via spliceosome	GO:0000398	0.215	0.351	0	0	0	0	Hnrnpa1|1;Hnrnpa2b1|1;Hnrnpm|1	3	679	126	53607	http://www.ebi.ac.uk/QuickGO/GTerm?id=GO:0000398	[]
5	5	response to ATP	GO:0033198	0.215	0.352	0	0	0	0	Hspd1|1	1	103	126	53607	http://www.ebi.ac.uk/QuickGO/GTerm?id=GO:0033198	[]
4	4	cellular response to estrogen stimulus	GO:0071391	0.215	0.352	0	0	0	0	H2afz|1	1	103	126	53607	http://www.ebi.ac.uk/QuickGO/GTerm?id=GO:0071391	[]
9	8,9	RNA splicing, via transesterification reactions	GO:0000375	0.216	0.352	0	0	0	0	Hnrnpa1|1;Hnrnpa2b1|1;Hnrnpm|1	3	681	126	53607	http://www.ebi.ac.uk/QuickGO/GTerm?id=GO:0000375	[]
6	5,6	regulation of leukocyte cell-cell adhesion	GO:1903037	0.216	0.352	0	0	0	0	Spta1|1;Ass1|1;Hspd1|1	3	681	126	53607	http://www.ebi.ac.uk/QuickGO/GTerm?id=GO:1903037	[]
6	6	lactation	GO:0007595	0.217	0.353	0	0	0	0	Got2|1	1	104	126	53607	http://www.ebi.ac.uk/QuickGO/GTerm?id=GO:0007595	[]
7	6,7	neuron maturation	GO:0042551	0.217	0.353	0	0	0	0	Rac1|1	1	104	126	53607	http://www.ebi.ac.uk/QuickGO/GTerm?id=GO:0042551	[]
5	5	toxin transport	GO:1901998	0.217	0.353	0	0	0	0	Atp6v0a1|1	1	104	126	53607	http://www.ebi.ac.uk/QuickGO/GTerm?id=GO:1901998	[]
7	6,7	regulation of glycoprotein biosynthetic process	GO:0010559	0.217	0.353	0	0	0	0	Ep300|1	1	104	126	53607	http://www.ebi.ac.uk/QuickGO/GTerm?id=GO:0010559	[]
5	5	respiratory system development	GO:0060541	0.218	0.354	0	0	0	0	Ep300|1;Ptges3|1;Ass1|1	3	684	126	53607	http://www.ebi.ac.uk/QuickGO/GTerm?id=GO:0060541	[]
7	6,7	organic anion transport	GO:0015711	0.218	0.354	0	0	0	0	Got2|1;Abat|1;Slc1a2|1;Slc32a1|1	4	1017	126	53607	http://www.ebi.ac.uk/QuickGO/GTerm?id=GO:0015711	[]
7	7	inorganic anion transport	GO:0015698	0.219	0.354	0	0	0	0	Slc25a3|1;Slc12a2|1	2	373	126	53607	http://www.ebi.ac.uk/QuickGO/GTerm?id=GO:0015698	[]
7	6,7	calcium-mediated signaling	GO:0019722	0.219	0.354	0	0	0	0	Ppp3ca|1;Vsnl1|1	2	373	126	53607	http://www.ebi.ac.uk/QuickGO/GTerm?id=GO:0019722	[]
4	4	regulation of multicellular organismal metabolic process	GO:0044246	0.219	0.354	0	0	0	0	Ep300|1	1	105	126	53607	http://www.ebi.ac.uk/QuickGO/GTerm?id=GO:0044246	[]
10	8,9,10	nuclear-transcribed mRNA catabolic process, deadenylation-dependent decay	GO:0000288	0.219	0.354	0	0	0	0	Pabpc1|1	1	105	126	53607	http://www.ebi.ac.uk/QuickGO/GTerm?id=GO:0000288	[]
5	5	negative regulation of stem cell differentiation	GO:2000737	0.219	0.354	0	0	0	0	Hspa9|1	1	105	126	53607	http://www.ebi.ac.uk/QuickGO/GTerm?id=GO:2000737	[]
9	7,8,9	regulation of protein export from nucleus	GO:0046825	0.219	0.354	0	0	0	0	Ywhae|1	1	105	126	53607	http://www.ebi.ac.uk/QuickGO/GTerm?id=GO:0046825	[]
7	6,7	skeletal muscle contraction	GO:0003009	0.219	0.354	0	0	0	0	Eef2|1	1	105	126	53607	http://www.ebi.ac.uk/QuickGO/GTerm?id=GO:0003009	[]
7	5,6,7	positive regulation of phospholipid metabolic process	GO:1903727	0.219	0.354	0	0	0	0	Rac1|1	1	105	126	53607	http://www.ebi.ac.uk/QuickGO/GTerm?id=GO:1903727	[]
7	6,7	regulation of protein localization to cell surface	GO:2000008	0.219	0.354	0	0	0	0	Hsp90ab1|1	1	105	126	53607	http://www.ebi.ac.uk/QuickGO/GTerm?id=GO:2000008	[]
5	5	amyloid precursor protein metabolic process	GO:0042982	0.219	0.354	0	0	0	0	Rock2|1	1	105	126	53607	http://www.ebi.ac.uk/QuickGO/GTerm?id=GO:0042982	[]
7	5,6,7	neurotrophin signaling pathway	GO:0038179	0.219	0.354	0	0	0	0	Cyfip1|1	1	105	126	53607	http://www.ebi.ac.uk/QuickGO/GTerm?id=GO:0038179	[]
5	5	epithelium development	GO:0060429	0.22	0.354	0	0	0	0	Ep300|1;Dbi|1;Rock2|1;H2afy2|1;Acat1|1;Basp1|1;Rac1|1;Slc12a2|1;Calb1|1	9	2822	126	53607	http://www.ebi.ac.uk/QuickGO/GTerm?id=GO:0060429	[]
10	8,9,10	calcium ion transmembrane transport	GO:0070588	0.22	0.354	0	0	0	0	Dbi|1;Atp2b1|1;Ywhae|1	3	687	126	53607	http://www.ebi.ac.uk/QuickGO/GTerm?id=GO:0070588	[]
5	5	positive regulation of cell migration	GO:0030335	0.22	0.355	0	0	0	0	Rock2|1;Atp5a1|1;Rac1|1;Calr|1	4	1021	126	53607	http://www.ebi.ac.uk/QuickGO/GTerm?id=GO:0030335	[]
5	5	hemopoiesis	GO:0030097	0.22	0.355	0	0	0	0	Ep300|1;Spta1|1;Hbb-b1|1;Prdx3|1;Hba|1;Eef2|1;Hspa9|1	7	2085	126	53607	http://www.ebi.ac.uk/QuickGO/GTerm?id=GO:0030097	[]
4	4	regulation of cell communication	GO:0010646	0.221	0.355	0	0	0	0	Ep300|1;Dbi|1;Ywhag|1;Cyfip1|1;Rock2|1;Ndufc2|1;Ube2o|1;Sptbn1|1;Gnai1|1;Ppp3ca|1;Glud1|1;Abat|1;Anxa5|1;Pdk1|1;Syn1|1;Psd3|1;Hsp90ab1|1;Rac1|1;Calb1|1;Vsnl1|1;Mdh1|1;Calr|1	22	7870	126	53607	http://www.ebi.ac.uk/QuickGO/GTerm?id=GO:0010646	[]
5	5	membrane invagination	GO:0010324	0.221	0.355	0	0	0	0	Rac1|1	1	106	126	53607	http://www.ebi.ac.uk/QuickGO/GTerm?id=GO:0010324	[]
6	6	cellular response to fatty acid	GO:0071398	0.221	0.355	0	0	0	0	Ass1|1	1	106	126	53607	http://www.ebi.ac.uk/QuickGO/GTerm?id=GO:0071398	[]
7	7	bicellular tight junction assembly	GO:0070830	0.221	0.355	0	0	0	0	Rock2|1	1	106	126	53607	http://www.ebi.ac.uk/QuickGO/GTerm?id=GO:0070830	[]
6	6	regulation of granulocyte chemotaxis	GO:0071622	0.221	0.355	0	0	0	0	Rac1|1	1	106	126	53607	http://www.ebi.ac.uk/QuickGO/GTerm?id=GO:0071622	[]
2	2	multi-organism process	GO:0051704	0.221	0.356	0	0	0	0	Pabpc1|1;Ep300|1;Afp|1;Rock2|1;Prdx3|1;Got2|1;Abat|1;Anxa5|1;Dld|1;Cnp|1;Hsp90ab1|1;Ass1|1;Hspd1|1;Mdh1|1;Calr|1	15	5119	126	53607	http://www.ebi.ac.uk/QuickGO/GTerm?id=GO:0051704	[]
7	6,7	regulation of microtubule polymerization	GO:0031113	0.223	0.357	0	0	0	0	Rac1|1	1	107	126	53607	http://www.ebi.ac.uk/QuickGO/GTerm?id=GO:0031113	[]
8	4,5,6,7,8	positive regulation of telomere maintenance	GO:0032206	0.223	0.357	0	0	0	0	Hnrnpa2b1|1	1	107	126	53607	http://www.ebi.ac.uk/QuickGO/GTerm?id=GO:0032206	[]
5	5	necrotic cell death	GO:0070265	0.223	0.357	0	0	0	0	Ndufc2|1	1	107	126	53607	http://www.ebi.ac.uk/QuickGO/GTerm?id=GO:0070265	[]
5	5	lipid catabolic process	GO:0016042	0.223	0.358	0	0	0	0	Dbi|1;Etfdh|1;Acat1|1	3	693	126	53607	http://www.ebi.ac.uk/QuickGO/GTerm?id=GO:0016042	[]
8	6,8	negative regulation of gliogenesis	GO:0014014	0.225	0.359	0	0	0	0	Idh2|1	1	108	126	53607	http://www.ebi.ac.uk/QuickGO/GTerm?id=GO:0014014	[]
5	5	interleukin-10 production	GO:0032613	0.225	0.359	0	0	0	0	Hspd1|1	1	108	126	53607	http://www.ebi.ac.uk/QuickGO/GTerm?id=GO:0032613	[]
6	6	regulation of lamellipodium organization	GO:1902743	0.225	0.359	0	0	0	0	Rac1|1	1	108	126	53607	http://www.ebi.ac.uk/QuickGO/GTerm?id=GO:1902743	[]
8	7,8	positive regulation of protein dephosphorylation	GO:0035307	0.225	0.359	0	0	0	0	Hsp90ab1|1	1	108	126	53607	http://www.ebi.ac.uk/QuickGO/GTerm?id=GO:0035307	[]
7	6,7	intrinsic apoptotic signaling pathway in response to oxidative stress	GO:0008631	0.225	0.359	0	0	0	0	Pdk1|1	1	108	126	53607	http://www.ebi.ac.uk/QuickGO/GTerm?id=GO:0008631	[]
8	5,7,8	catecholamine secretion	GO:0050432	0.225	0.359	0	0	0	0	Abat|1	1	108	126	53607	http://www.ebi.ac.uk/QuickGO/GTerm?id=GO:0050432	[]
7	7	DNA packaging	GO:0006323	0.226	0.36	0	0	0	0	H3f3c|1;H2afy2|1	2	381	126	53607	http://www.ebi.ac.uk/QuickGO/GTerm?id=GO:0006323	[]
6	6	cellular modified amino acid biosynthetic process	GO:0042398	0.226	0.36	0	0	0	0	Aldh7a1|1	1	109	126	53607	http://www.ebi.ac.uk/QuickGO/GTerm?id=GO:0042398	[]
6	5,6	adipose tissue development	GO:0060612	0.226	0.36	0	0	0	0	Acat1|1	1	109	126	53607	http://www.ebi.ac.uk/QuickGO/GTerm?id=GO:0060612	[]
4	4	regulation of meiotic cell cycle	GO:0051445	0.226	0.36	0	0	0	0	Calr|1	1	109	126	53607	http://www.ebi.ac.uk/QuickGO/GTerm?id=GO:0051445	[]
7	5,7	catecholamine metabolic process	GO:0006584	0.226	0.36	0	0	0	0	Abat|1	1	109	126	53607	http://www.ebi.ac.uk/QuickGO/GTerm?id=GO:0006584	[]
6	6	catechol-containing compound metabolic process	GO:0009712	0.226	0.36	0	0	0	0	Abat|1	1	109	126	53607	http://www.ebi.ac.uk/QuickGO/GTerm?id=GO:0009712	[]
4	4	regulation of chemotaxis	GO:0050920	0.227	0.36	0	0	0	0	Rac1|1;Calr|1	2	382	126	53607	http://www.ebi.ac.uk/QuickGO/GTerm?id=GO:0050920	[]
5	5	mammary gland development	GO:0030879	0.227	0.36	0	0	0	0	Got2|1;Slc12a2|1	2	382	126	53607	http://www.ebi.ac.uk/QuickGO/GTerm?id=GO:0030879	[]
7	5,6,7	regulation of homotypic cell-cell adhesion	GO:0034110	0.228	0.362	0	0	0	0	Spta1|1;Abat|1;Hspd1|1	3	700	126	53607	http://www.ebi.ac.uk/QuickGO/GTerm?id=GO:0034110	[]
7	6,7	arachidonic acid metabolic process	GO:0019369	0.228	0.362	0	0	0	0	Fam213b|1	1	110	126	53607	http://www.ebi.ac.uk/QuickGO/GTerm?id=GO:0019369	[]
6	5,6	somatic diversification of immunoglobulins involved in immune response	GO:0002208	0.228	0.362	0	0	0	0	Hspd1|1	1	110	126	53607	http://www.ebi.ac.uk/QuickGO/GTerm?id=GO:0002208	[]
4	4	cochlea development	GO:0090102	0.228	0.362	0	0	0	0	Rac1|1	1	110	126	53607	http://www.ebi.ac.uk/QuickGO/GTerm?id=GO:0090102	[]
7	6,7	somatic recombination of immunoglobulin genes involved in immune response	GO:0002204	0.228	0.362	0	0	0	0	Hspd1|1	1	110	126	53607	http://www.ebi.ac.uk/QuickGO/GTerm?id=GO:0002204	[]
4	4	isotype switching	GO:0045190	0.228	0.362	0	0	0	0	Hspd1|1	1	110	126	53607	http://www.ebi.ac.uk/QuickGO/GTerm?id=GO:0045190	[]
4	4	establishment of organelle localization	GO:0051656	0.228	0.362	0	0	0	0	Ywhaz|1;Cyfip1|1;Sh3gl2|1;Amph|1	4	1038	126	53607	http://www.ebi.ac.uk/QuickGO/GTerm?id=GO:0051656	[]
6	4,5,6	regulation of viral process	GO:0050792	0.229	0.363	0	0	0	0	Pabpc1|1;Ep300|1	2	385	126	53607	http://www.ebi.ac.uk/QuickGO/GTerm?id=GO:0050792	[]
6	6	regulation of muscle contraction	GO:0006937	0.229	0.363	0	0	0	0	Abat|1;Anxa6|1	2	385	126	53607	http://www.ebi.ac.uk/QuickGO/GTerm?id=GO:0006937	[]
6	6	cellular response to ammonium ion	GO:0071242	0.23	0.363	0	0	0	0	Ass1|1	1	111	126	53607	http://www.ebi.ac.uk/QuickGO/GTerm?id=GO:0071242	[]
7	5,6,7	regulation of mitochondrial membrane permeability	GO:0046902	0.23	0.363	0	0	0	0	Cnp|1	1	111	126	53607	http://www.ebi.ac.uk/QuickGO/GTerm?id=GO:0046902	[]
9	6,7,9	regulation of lipid kinase activity	GO:0043550	0.23	0.363	0	0	0	0	Rac1|1	1	111	126	53607	http://www.ebi.ac.uk/QuickGO/GTerm?id=GO:0043550	[]
10	6,7,8,9,10	negative regulation of mRNA processing	GO:0050686	0.23	0.363	0	0	0	0	Hnrnpa2b1|1	1	111	126	53607	http://www.ebi.ac.uk/QuickGO/GTerm?id=GO:0050686	[]
10	6,7,9,10	positive regulation of blood vessel endothelial cell migration	GO:0043536	0.232	0.366	0	0	0	0	Atp5a1|1	1	112	126	53607	http://www.ebi.ac.uk/QuickGO/GTerm?id=GO:0043536	[]
6	6	positive regulation of DNA binding	GO:0043388	0.232	0.366	0	0	0	0	Ep300|1	1	112	126	53607	http://www.ebi.ac.uk/QuickGO/GTerm?id=GO:0043388	[]
9	6,7,8,9	positive regulation of T cell activation	GO:0050870	0.234	0.37	0	0	0	0	Spta1|1;Hspd1|1	2	391	126	53607	http://www.ebi.ac.uk/QuickGO/GTerm?id=GO:0050870	[]
7	6,7	intracellular protein transmembrane transport	GO:0065002	0.236	0.37	0	0	0	0	Hspd1|1	1	114	126	53607	http://www.ebi.ac.uk/QuickGO/GTerm?id=GO:0065002	[]
7	6,7	glycosphingolipid metabolic process	GO:0006687	0.236	0.37	0	0	0	0	Aldh5a1|1	1	114	126	53607	http://www.ebi.ac.uk/QuickGO/GTerm?id=GO:0006687	[]
7	7	positive regulation of dephosphorylation	GO:0035306	0.236	0.37	0	0	0	0	Hsp90ab1|1	1	114	126	53607	http://www.ebi.ac.uk/QuickGO/GTerm?id=GO:0035306	[]
7	5,6,7	positive regulation of stress fiber assembly	GO:0051496	0.236	0.37	0	0	0	0	Rac1|1	1	114	126	53607	http://www.ebi.ac.uk/QuickGO/GTerm?id=GO:0051496	[]
6	5,6	positive regulation of protein localization to plasma membrane	GO:1903078	0.236	0.37	0	0	0	0	Sptbn1|1	1	114	126	53607	http://www.ebi.ac.uk/QuickGO/GTerm?id=GO:1903078	[]
4	4	membrane biogenesis	GO:0044091	0.236	0.37	0	0	0	0	Sptbn1|1	1	114	126	53607	http://www.ebi.ac.uk/QuickGO/GTerm?id=GO:0044091	[]
6	6	regulation of coenzyme metabolic process	GO:0051196	0.236	0.37	0	0	0	0	Pdk1|1	1	114	126	53607	http://www.ebi.ac.uk/QuickGO/GTerm?id=GO:0051196	[]
11	11	protein K63-linked ubiquitination	GO:0070534	0.236	0.37	0	0	0	0	Ube2o|1	1	114	126	53607	http://www.ebi.ac.uk/QuickGO/GTerm?id=GO:0070534	[]
4	4	retina development in camera-type eye	GO:0060041	0.236	0.37	0	0	0	0	Atp2b1|1;Calb1|1	2	393	126	53607	http://www.ebi.ac.uk/QuickGO/GTerm?id=GO:0060041	[]
5	4,5	positive regulation of cell motility	GO:2000147	0.236	0.371	0	0	0	0	Rock2|1;Atp5a1|1;Rac1|1;Calr|1	4	1054	126	53607	http://www.ebi.ac.uk/QuickGO/GTerm?id=GO:2000147	[]
5	5	regulation of cofactor metabolic process	GO:0051193	0.237	0.372	0	0	0	0	Pdk1|1	1	115	126	53607	http://www.ebi.ac.uk/QuickGO/GTerm?id=GO:0051193	[]
11	5,7,10,11	positive regulation of glucose import	GO:0046326	0.237	0.372	0	0	0	0	Slc1a2|1	1	115	126	53607	http://www.ebi.ac.uk/QuickGO/GTerm?id=GO:0046326	[]
5	5	negative regulation of protein metabolic process	GO:0051248	0.238	0.372	0	0	0	0	Ep300|1;Hnrnpa2b1|1;Rock2|1;Prdx3|1;Ppp3ca|1;Ywhae|1;Pura|1;Hsp90ab1|1;Calr|1	9	2883	126	53607	http://www.ebi.ac.uk/QuickGO/GTerm?id=GO:0051248	[]
4	4	cell cycle	GO:0007049	0.238	0.373	0	0	0	0	Ep300|1;Sept11|1;Cltc|1;Rock2|1;Taf6|1;Sptbn1|1;Gnai1|1;Ppp3ca|1;Pura|1;Sept5|1;Hsp90ab1|1;Calr|1	12	4029	126	53607	http://www.ebi.ac.uk/QuickGO/GTerm?id=GO:0007049	[]
5	5	regulation of lipid metabolic process	GO:0019216	0.238	0.373	0	0	0	0	Dbi|1;Pdk1|1;Rac1|1	3	717	126	53607	http://www.ebi.ac.uk/QuickGO/GTerm?id=GO:0019216	[]
7	6,7	RNA catabolic process	GO:0006401	0.239	0.373	0	0	0	0	Pabpc1|1;Lrpprc|1	2	396	126	53607	http://www.ebi.ac.uk/QuickGO/GTerm?id=GO:0006401	[]
6	5,6	regulation of glycoprotein metabolic process	GO:1903018	0.239	0.373	0	0	0	0	Ep300|1	1	116	126	53607	http://www.ebi.ac.uk/QuickGO/GTerm?id=GO:1903018	[]
7	6,7	homeostasis of number of cells within a tissue	GO:0048873	0.239	0.373	0	0	0	0	Rac1|1	1	116	126	53607	http://www.ebi.ac.uk/QuickGO/GTerm?id=GO:0048873	[]
4	4	glomerulus development	GO:0032835	0.239	0.373	0	0	0	0	Basp1|1	1	116	126	53607	http://www.ebi.ac.uk/QuickGO/GTerm?id=GO:0032835	[]
5	5	cellular response to mechanical stimulus	GO:0071260	0.239	0.373	0	0	0	0	Rac1|1	1	116	126	53607	http://www.ebi.ac.uk/QuickGO/GTerm?id=GO:0071260	[]
9	5,7,9	negative regulation of neurogenesis	GO:0050768	0.24	0.374	0	0	0	0	Idh2|1;Ppp3ca|1;Calr|1	3	720	126	53607	http://www.ebi.ac.uk/QuickGO/GTerm?id=GO:0050768	[]
5	5	regulation of defense response	GO:0031347	0.24	0.374	0	0	0	0	Ndufc2|1;Anxa5|1;Hsp90ab1|1;Hspd1|1;Mdh1|1	5	1415	126	53607	http://www.ebi.ac.uk/QuickGO/GTerm?id=GO:0031347	[]
9	9	iron ion transport	GO:0006826	0.241	0.374	0	0	0	0	Cltc|1	1	117	126	53607	http://www.ebi.ac.uk/QuickGO/GTerm?id=GO:0006826	[]
8	7,8	calcineurin-NFAT signaling cascade	GO:0033173	0.241	0.374	0	0	0	0	Ppp3ca|1	1	117	126	53607	http://www.ebi.ac.uk/QuickGO/GTerm?id=GO:0033173	[]
6	5,6	regulation of interleukin-12 production	GO:0032655	0.241	0.374	0	0	0	0	Hspd1|1	1	117	126	53607	http://www.ebi.ac.uk/QuickGO/GTerm?id=GO:0032655	[]
11	7,9,11	regulation of potassium ion transmembrane transporter activity	GO:1901016	0.241	0.374	0	0	0	0	Ywhae|1	1	117	126	53607	http://www.ebi.ac.uk/QuickGO/GTerm?id=GO:1901016	[]
8	7,8	central nervous system neuron axonogenesis	GO:0021955	0.241	0.374	0	0	0	0	Hsp90ab1|1	1	117	126	53607	http://www.ebi.ac.uk/QuickGO/GTerm?id=GO:0021955	[]
6	5,6	regulation of retinoic acid receptor signaling pathway	GO:0048385	0.241	0.374	0	0	0	0	Calr|1	1	117	126	53607	http://www.ebi.ac.uk/QuickGO/GTerm?id=GO:0048385	[]
7	5,6,7	positive regulation of type I interferon production	GO:0032481	0.241	0.374	0	0	0	0	Hspd1|1	1	117	126	53607	http://www.ebi.ac.uk/QuickGO/GTerm?id=GO:0032481	[]
5	5	cell maturation	GO:0048469	0.241	0.374	0	0	0	0	Dld|1;Rac1|1	2	399	126	53607	http://www.ebi.ac.uk/QuickGO/GTerm?id=GO:0048469	[]
4	4	cellular developmental process	GO:0048869	0.242	0.375	0	0	0	0	Ep300|1;Dbi|1;Spta1|1;Ywhag|1;Hbb-b1|1;Cltc|1;Negr1|1;Cyfip1|1;Idh2|1;Rock2|1;Prdx3|1;Gnao1|1;Ppp3ca|1;Hba|1;Eef2|1;Ywhae|1;H2afy2|1;Syn1|1;Pura|1;Dld|1;Psd3|1;Cnp|1;Basp1|1;Hsp90ab1|1;Rac1|1;Sh3gl2|1;Hspa9|1;Epb41l3|1;Calr|1	29	10808	126	53607	http://www.ebi.ac.uk/QuickGO/GTerm?id=GO:0048869	[]
5	5	ventricular system development	GO:0021591	0.243	0.376	0	0	0	0	Dbi|1	1	118	126	53607	http://www.ebi.ac.uk/QuickGO/GTerm?id=GO:0021591	[]
4	4	response to antibiotic	GO:0046677	0.243	0.376	0	0	0	0	Ep300|1	1	118	126	53607	http://www.ebi.ac.uk/QuickGO/GTerm?id=GO:0046677	[]
6	4,5,6	regulation of cell projection assembly	GO:0060491	0.243	0.376	0	0	0	0	Cyfip1|1;Rac1|1	2	401	126	53607	http://www.ebi.ac.uk/QuickGO/GTerm?id=GO:0060491	[]
4	4	regulation of leukocyte migration	GO:0002685	0.244	0.377	0	0	0	0	Rac1|1;Calr|1	2	402	126	53607	http://www.ebi.ac.uk/QuickGO/GTerm?id=GO:0002685	[]
4	4	negative regulation of response to wounding	GO:1903035	0.244	0.377	0	0	0	0	Abat|1;Anxa5|1	2	402	126	53607	http://www.ebi.ac.uk/QuickGO/GTerm?id=GO:1903035	[]
7	5,6,7	protein transmembrane transport	GO:0071806	0.244	0.378	0	0	0	0	Hspd1|1	1	119	126	53607	http://www.ebi.ac.uk/QuickGO/GTerm?id=GO:0071806	[]
7	6,7	sterol biosynthetic process	GO:0016126	0.244	0.378	0	0	0	0	Cyb5r1|1	1	119	126	53607	http://www.ebi.ac.uk/QuickGO/GTerm?id=GO:0016126	[]
6	5,6	positive regulation of cell development	GO:0010720	0.245	0.378	0	0	0	0	Ep300|1;Negr1|1;Cyfip1|1;Rac1|1;Calr|1	5	1425	126	53607	http://www.ebi.ac.uk/QuickGO/GTerm?id=GO:0010720	[]
6	6	response to tumor necrosis factor	GO:0034612	0.245	0.378	0	0	0	0	Ep300|1;Ass1|1	2	403	126	53607	http://www.ebi.ac.uk/QuickGO/GTerm?id=GO:0034612	[]
4	3,4	regulation of behavior	GO:0050795	0.246	0.379	0	0	0	0	Rac1|1;Calr|1	2	404	126	53607	http://www.ebi.ac.uk/QuickGO/GTerm?id=GO:0050795	[]
5	4,5	positive regulation of cell growth	GO:0030307	0.246	0.379	0	0	0	0	Ep300|1;Cyfip1|1	2	404	126	53607	http://www.ebi.ac.uk/QuickGO/GTerm?id=GO:0030307	[]
5	5	regulation of lipid catabolic process	GO:0050994	0.246	0.38	0	0	0	0	Dbi|1	1	120	126	53607	http://www.ebi.ac.uk/QuickGO/GTerm?id=GO:0050994	[]
6	5,6	regulation of cytokine secretion	GO:0050707	0.246	0.38	0	0	0	0	Sptbn1|1;Hspd1|1	2	405	126	53607	http://www.ebi.ac.uk/QuickGO/GTerm?id=GO:0050707	[]
4	4	positive regulation of cellular component movement	GO:0051272	0.246	0.38	0	0	0	0	Rock2|1;Atp5a1|1;Rac1|1;Calr|1	4	1074	126	53607	http://www.ebi.ac.uk/QuickGO/GTerm?id=GO:0051272	[]
5	5	extracellular matrix organization	GO:0030198	0.248	0.381	0	0	0	0	Ep300|1;Spta1|1;Cyfip1|1;Sptbn1|1;Hsp90ab1|1;Rac1|1	6	1796	126	53607	http://www.ebi.ac.uk/QuickGO/GTerm?id=GO:0030198	[]
7	6,7	ncRNA metabolic process	GO:0034660	0.248	0.381	0	0	0	0	Ep300|1;Hnrnpa2b1|1;H2afy2|1;Top1|1	4	1077	126	53607	http://www.ebi.ac.uk/QuickGO/GTerm?id=GO:0034660	[]
7	7	transcription from RNA polymerase I promoter	GO:0006360	0.248	0.381	0	0	0	0	H2afy2|1	1	121	126	53607	http://www.ebi.ac.uk/QuickGO/GTerm?id=GO:0006360	[]
6	5,6	positive regulation of cell-matrix adhesion	GO:0001954	0.248	0.381	0	0	0	0	Rac1|1	1	121	126	53607	http://www.ebi.ac.uk/QuickGO/GTerm?id=GO:0001954	[]
11	7,8,9,10,11	regulation of histone acetylation	GO:0035065	0.248	0.381	0	0	0	0	Ep300|1	1	121	126	53607	http://www.ebi.ac.uk/QuickGO/GTerm?id=GO:0035065	[]
8	5,6,7,8	negative regulation of ion transmembrane transporter activity	GO:0032413	0.248	0.381	0	0	0	0	Ywhae|1	1	121	126	53607	http://www.ebi.ac.uk/QuickGO/GTerm?id=GO:0032413	[]
7	5,6,7	positive regulation of homotypic cell-cell adhesion	GO:0034112	0.248	0.381	0	0	0	0	Spta1|1;Hspd1|1	2	407	126	53607	http://www.ebi.ac.uk/QuickGO/GTerm?id=GO:0034112	[]
4	4	extracellular structure organization	GO:0043062	0.25	0.383	0	0	0	0	Ep300|1;Spta1|1;Cyfip1|1;Sptbn1|1;Hsp90ab1|1;Rac1|1	6	1800	126	53607	http://www.ebi.ac.uk/QuickGO/GTerm?id=GO:0043062	[]
4	4	regulation of membrane permeability	GO:0090559	0.25	0.383	0	0	0	0	Cnp|1	1	122	126	53607	http://www.ebi.ac.uk/QuickGO/GTerm?id=GO:0090559	[]
6	6	hematopoietic progenitor cell differentiation	GO:0002244	0.251	0.384	0	0	0	0	Eef2|1;Hspa9|1	2	410	126	53607	http://www.ebi.ac.uk/QuickGO/GTerm?id=GO:0002244	[]
11	7,8,11	histone acetylation	GO:0016573	0.251	0.384	0	0	0	0	Ep300|1;Jade3|1	2	410	126	53607	http://www.ebi.ac.uk/QuickGO/GTerm?id=GO:0016573	[]
6	6	cerebral cortex radially oriented cell migration	GO:0021799	0.252	0.384	0	0	0	0	Rac1|1	1	123	126	53607	http://www.ebi.ac.uk/QuickGO/GTerm?id=GO:0021799	[]
4	4	behavioral fear response	GO:0001662	0.252	0.384	0	0	0	0	Dbi|1	1	123	126	53607	http://www.ebi.ac.uk/QuickGO/GTerm?id=GO:0001662	[]
6	4,6	negative regulation of carbohydrate metabolic process	GO:0045912	0.252	0.384	0	0	0	0	Cltc|1	1	123	126	53607	http://www.ebi.ac.uk/QuickGO/GTerm?id=GO:0045912	[]
7	7	positive regulation of peptidase activity	GO:0010952	0.252	0.384	0	0	0	0	Rock2|1;Hspd1|1	2	411	126	53607	http://www.ebi.ac.uk/QuickGO/GTerm?id=GO:0010952	[]
5	5	cellular response to acid chemical	GO:0071229	0.252	0.384	0	0	0	0	Ep300|1;Ass1|1	2	411	126	53607	http://www.ebi.ac.uk/QuickGO/GTerm?id=GO:0071229	[]
5	5	receptor metabolic process	GO:0043112	0.253	0.385	0	0	0	0	Cltc|1;Sh3gl2|1	2	412	126	53607	http://www.ebi.ac.uk/QuickGO/GTerm?id=GO:0043112	[]
8	5,8	neuron migration	GO:0001764	0.253	0.385	0	0	0	0	Ywhae|1;Rac1|1	2	412	126	53607	http://www.ebi.ac.uk/QuickGO/GTerm?id=GO:0001764	[]
7	7	non-canonical Wnt signaling pathway	GO:0035567	0.253	0.386	0	0	0	0	Rac1|1	1	124	126	53607	http://www.ebi.ac.uk/QuickGO/GTerm?id=GO:0035567	[]
5	3,5	behavioral defense response	GO:0002209	0.253	0.386	0	0	0	0	Dbi|1	1	124	126	53607	http://www.ebi.ac.uk/QuickGO/GTerm?id=GO:0002209	[]
8	6,7,8	positive regulation of mRNA metabolic process	GO:1903313	0.253	0.386	0	0	0	0	Pabpc1|1	1	124	126	53607	http://www.ebi.ac.uk/QuickGO/GTerm?id=GO:1903313	[]
7	5,6,7	positive regulation of leukocyte cell-cell adhesion	GO:1903039	0.253	0.386	0	0	0	0	Spta1|1;Hspd1|1	2	413	126	53607	http://www.ebi.ac.uk/QuickGO/GTerm?id=GO:1903039	[]
4	4	regulation of cell cycle process	GO:0010564	0.254	0.386	0	0	0	0	Cltc|1;Rock2|1;Gnai1|1;Hsp90ab1|1;Calr|1	5	1446	126	53607	http://www.ebi.ac.uk/QuickGO/GTerm?id=GO:0010564	[]
6	6	striated muscle tissue development	GO:0014706	0.255	0.387	0	0	0	0	Ep300|1;Ppp3ca|1;Eef2|1;Calr|1	4	1090	126	53607	http://www.ebi.ac.uk/QuickGO/GTerm?id=GO:0014706	[]
5	4,5	SMAD protein signal transduction	GO:0060395	0.255	0.387	0	0	0	0	Afp|1	1	125	126	53607	http://www.ebi.ac.uk/QuickGO/GTerm?id=GO:0060395	[]
8	5,7,8	establishment of planar polarity	GO:0001736	0.255	0.387	0	0	0	0	Rac1|1	1	125	126	53607	http://www.ebi.ac.uk/QuickGO/GTerm?id=GO:0001736	[]
5	5	regulation of centrosome cycle	GO:0046605	0.255	0.387	0	0	0	0	Rock2|1	1	125	126	53607	http://www.ebi.ac.uk/QuickGO/GTerm?id=GO:0046605	[]
6	5,6	positive regulation of extracellular matrix organization	GO:1903055	0.255	0.387	0	0	0	0	Cyfip1|1;Rac1|1	2	415	126	53607	http://www.ebi.ac.uk/QuickGO/GTerm?id=GO:1903055	[]
4	4	hematopoietic or lymphoid organ development	GO:0048534	0.256	0.388	0	0	0	0	Ep300|1;Spta1|1;Hbb-b1|1;Prdx3|1;Hba|1;Eef2|1;Hspa9|1	7	2187	126	53607	http://www.ebi.ac.uk/QuickGO/GTerm?id=GO:0048534	[]
6	6	striated muscle cell differentiation	GO:0051146	0.256	0.389	0	0	0	0	Ep300|1;Ppp3ca|1;Calr|1	3	746	126	53607	http://www.ebi.ac.uk/QuickGO/GTerm?id=GO:0051146	[]
3	3	positive regulation of locomotion	GO:0040017	0.257	0.389	0	0	0	0	Rock2|1;Atp5a1|1;Rac1|1;Calr|1	4	1094	126	53607	http://www.ebi.ac.uk/QuickGO/GTerm?id=GO:0040017	[]
4	4	establishment of tissue polarity	GO:0007164	0.257	0.389	0	0	0	0	Rac1|1	1	126	126	53607	http://www.ebi.ac.uk/QuickGO/GTerm?id=GO:0007164	[]
3	3	negative regulation of reproductive process	GO:2000242	0.257	0.389	0	0	0	0	Calr|1	1	126	126	53607	http://www.ebi.ac.uk/QuickGO/GTerm?id=GO:2000242	[]
8	6,7,8	regulation of mRNA metabolic process	GO:1903311	0.257	0.389	0	0	0	0	Pabpc1|1;Hnrnpa2b1|1	2	417	126	53607	http://www.ebi.ac.uk/QuickGO/GTerm?id=GO:1903311	[]
8	4,5,7,8	regulation of gene silencing	GO:0060968	0.259	0.391	0	0	0	0	Ppp3ca|1	1	127	126	53607	http://www.ebi.ac.uk/QuickGO/GTerm?id=GO:0060968	[]
7	5,7	positive regulation of anion transport	GO:1903793	0.259	0.391	0	0	0	0	Abat|1	1	127	126	53607	http://www.ebi.ac.uk/QuickGO/GTerm?id=GO:1903793	[]
5	4,5	positive regulation of response to biotic stimulus	GO:0002833	0.259	0.391	0	0	0	0	Hspd1|1	1	127	126	53607	http://www.ebi.ac.uk/QuickGO/GTerm?id=GO:0002833	[]
5	4,5	positive regulation of catabolic process	GO:0009896	0.259	0.391	0	0	0	0	Pabpc1|1;Anxa5|1;Pdk1|1;Mdh1|1	4	1099	126	53607	http://www.ebi.ac.uk/QuickGO/GTerm?id=GO:0009896	[]
5	5	regulation of carbohydrate metabolic process	GO:0006109	0.259	0.391	0	0	0	0	Cltc|1;Pdk1|1	2	420	126	53607	http://www.ebi.ac.uk/QuickGO/GTerm?id=GO:0006109	[]
8	6,7,8	positive regulation of calcium-mediated signaling	GO:0050850	0.26	0.391	0	0	0	0	Ppp3ca|1	1	128	126	53607	http://www.ebi.ac.uk/QuickGO/GTerm?id=GO:0050850	[]
8	8	DNA duplex unwinding	GO:0032508	0.26	0.391	0	0	0	0	Pura|1	1	128	126	53607	http://www.ebi.ac.uk/QuickGO/GTerm?id=GO:0032508	[]
12	8,9,11,12	Arp2/3 complex-mediated actin nucleation	GO:0034314	0.26	0.391	0	0	0	0	Cyfip1|1	1	128	126	53607	http://www.ebi.ac.uk/QuickGO/GTerm?id=GO:0034314	[]
7	7	mitochondrial translation	GO:0032543	0.26	0.391	0	0	0	0	Lrpprc|1	1	128	126	53607	http://www.ebi.ac.uk/QuickGO/GTerm?id=GO:0032543	[]
6	5,6	cellular polysaccharide biosynthetic process	GO:0033692	0.26	0.391	0	0	0	0	Ptges3|1	1	128	126	53607	http://www.ebi.ac.uk/QuickGO/GTerm?id=GO:0033692	[]
8	4,6,7,8	positive regulation of calcium ion transport into cytosol	GO:0010524	0.26	0.391	0	0	0	0	Dbi|1	1	128	126	53607	http://www.ebi.ac.uk/QuickGO/GTerm?id=GO:0010524	[]
7	5,6,7	regulation of organic acid transport	GO:0032890	0.26	0.391	0	0	0	0	Abat|1	1	128	126	53607	http://www.ebi.ac.uk/QuickGO/GTerm?id=GO:0032890	[]
8	7,8	rRNA metabolic process	GO:0016072	0.26	0.391	0	0	0	0	H2afy2|1;Top1|1	2	421	126	53607	http://www.ebi.ac.uk/QuickGO/GTerm?id=GO:0016072	[]
6	5,6	nucleobase-containing compound catabolic process	GO:0034655	0.261	0.392	0	0	0	0	Pabpc1|1;Lrpprc|1;Cnp|1	3	753	126	53607	http://www.ebi.ac.uk/QuickGO/GTerm?id=GO:0034655	[]
5	5	interleukin-12 production	GO:0032615	0.262	0.393	0	0	0	0	Hspd1|1	1	129	126	53607	http://www.ebi.ac.uk/QuickGO/GTerm?id=GO:0032615	[]
5	5	fear response	GO:0042596	0.262	0.393	0	0	0	0	Dbi|1	1	129	126	53607	http://www.ebi.ac.uk/QuickGO/GTerm?id=GO:0042596	[]
7	6,7	actin filament organization	GO:0007015	0.262	0.393	0	0	0	0	Spta1|1;Cyfip1|1;Sptbn1|1;Rac1|1	4	1105	126	53607	http://www.ebi.ac.uk/QuickGO/GTerm?id=GO:0007015	[]
4	4	myeloid leukocyte activation	GO:0002274	0.263	0.394	0	0	0	0	Ywhaz|1;Hspd1|1	2	424	126	53607	http://www.ebi.ac.uk/QuickGO/GTerm?id=GO:0002274	[]
4	4	negative regulation of nervous system development	GO:0051961	0.263	0.394	0	0	0	0	Idh2|1;Ppp3ca|1;Calr|1	3	757	126	53607	http://www.ebi.ac.uk/QuickGO/GTerm?id=GO:0051961	[]
7	5,6,7	positive regulation of phagocytosis	GO:0050766	0.264	0.394	0	0	0	0	Calr|1	1	130	126	53607	http://www.ebi.ac.uk/QuickGO/GTerm?id=GO:0050766	[]
7	7	glycosaminoglycan biosynthetic process	GO:0006024	0.264	0.394	0	0	0	0	Cltc|1	1	130	126	53607	http://www.ebi.ac.uk/QuickGO/GTerm?id=GO:0006024	[]
9	6,7,8,9	regulation of establishment of protein localization to plasma membrane	GO:0090003	0.264	0.394	0	0	0	0	Lypla1|1	1	130	126	53607	http://www.ebi.ac.uk/QuickGO/GTerm?id=GO:0090003	[]
10	6,7,8,9,10	mRNA-containing ribonucleoprotein complex export from nucleus	GO:0071427	0.264	0.394	0	0	0	0	Hnrnpa2b1|1	1	130	126	53607	http://www.ebi.ac.uk/QuickGO/GTerm?id=GO:0071427	[]
5	5	import into cell	GO:0098657	0.264	0.394	0	0	0	0	Slc1a2|1	1	130	126	53607	http://www.ebi.ac.uk/QuickGO/GTerm?id=GO:0098657	[]
6	6	mRNA export from nucleus	GO:0006406	0.264	0.394	0	0	0	0	Hnrnpa2b1|1	1	130	126	53607	http://www.ebi.ac.uk/QuickGO/GTerm?id=GO:0006406	[]
4	4	spindle organization	GO:0007051	0.264	0.394	0	0	0	0	Cltc|1;Gnai1|1	2	425	126	53607	http://www.ebi.ac.uk/QuickGO/GTerm?id=GO:0007051	[]
5	5	cytoskeleton organization	GO:0007010	0.265	0.395	0	0	0	0	Ep300|1;Spta1|1;Cltc|1;Cyfip1|1;Rock2|1;Sptbn1|1;Gnai1|1;Cnp|1;Rac1|1;Epb41l3|1;Calr|1	11	3742	126	53607	http://www.ebi.ac.uk/QuickGO/GTerm?id=GO:0007010	[]
5	5	immunoglobulin production involved in immunoglobulin mediated immune response	GO:0002381	0.266	0.395	0	0	0	0	Hspd1|1	1	131	126	53607	http://www.ebi.ac.uk/QuickGO/GTerm?id=GO:0002381	[]
5	4,5	embryo implantation	GO:0007566	0.266	0.395	0	0	0	0	Calr|1	1	131	126	53607	http://www.ebi.ac.uk/QuickGO/GTerm?id=GO:0007566	[]
5	3,5	negative regulation of homeostatic process	GO:0032845	0.266	0.395	0	0	0	0	Dbi|1;Hspa9|1	2	427	126	53607	http://www.ebi.ac.uk/QuickGO/GTerm?id=GO:0032845	[]
4	4	placenta development	GO:0001890	0.266	0.395	0	0	0	0	Prdx3|1;Hsp90ab1|1	2	427	126	53607	http://www.ebi.ac.uk/QuickGO/GTerm?id=GO:0001890	[]
8	7,8	cAMP-mediated signaling	GO:0019933	0.267	0.397	0	0	0	0	Gnai1|1	1	132	126	53607	http://www.ebi.ac.uk/QuickGO/GTerm?id=GO:0019933	[]
10	6,7,8,9,10	positive regulation of calcium ion transmembrane transport	GO:1904427	0.267	0.397	0	0	0	0	Dbi|1	1	132	126	53607	http://www.ebi.ac.uk/QuickGO/GTerm?id=GO:1904427	[]
5	5	lysosome localization	GO:0032418	0.267	0.397	0	0	0	0	Ywhaz|1	1	132	126	53607	http://www.ebi.ac.uk/QuickGO/GTerm?id=GO:0032418	[]
7	5,6,7	regulation of viral transcription	GO:0046782	0.267	0.397	0	0	0	0	Ep300|1	1	132	126	53607	http://www.ebi.ac.uk/QuickGO/GTerm?id=GO:0046782	[]
6	5,6	DNA metabolic process	GO:0006259	0.268	0.398	0	0	0	0	Hnrnpa2b1|1;Ptges3|1;Pura|1;Top1|1;Hsp90ab1|1;Rac1|1;Hspd1|1;Calr|1	8	2599	126	53607	http://www.ebi.ac.uk/QuickGO/GTerm?id=GO:0006259	[]
6	4,5,6	negative regulation of transporter activity	GO:0032410	0.269	0.399	0	0	0	0	Ywhae|1	1	133	126	53607	http://www.ebi.ac.uk/QuickGO/GTerm?id=GO:0032410	[]
10	4,6,9,10	positive regulation of glucose transport	GO:0010828	0.269	0.399	0	0	0	0	Slc1a2|1	1	133	126	53607	http://www.ebi.ac.uk/QuickGO/GTerm?id=GO:0010828	[]
8	7,8	mRNA processing	GO:0006397	0.269	0.399	0	0	0	0	Pabpc1|1;Hnrnpa1|1;Hnrnpa2b1|1;Hnrnpm|1	4	1118	126	53607	http://www.ebi.ac.uk/QuickGO/GTerm?id=GO:0006397	[]
10	10	internal peptidyl-lysine acetylation	GO:0018393	0.27	0.4	0	0	0	0	Ep300|1;Jade3|1	2	432	126	53607	http://www.ebi.ac.uk/QuickGO/GTerm?id=GO:0018393	[]
4	4	production of molecular mediator involved in inflammatory response	GO:0002532	0.271	0.401	0	0	0	0	Ywhaz|1	1	134	126	53607	http://www.ebi.ac.uk/QuickGO/GTerm?id=GO:0002532	[]
7	6,7	catecholamine transport	GO:0051937	0.271	0.401	0	0	0	0	Abat|1	1	134	126	53607	http://www.ebi.ac.uk/QuickGO/GTerm?id=GO:0051937	[]
7	6,7	androgen receptor signaling pathway	GO:0030521	0.271	0.401	0	0	0	0	Ep300|1	1	134	126	53607	http://www.ebi.ac.uk/QuickGO/GTerm?id=GO:0030521	[]
5	5	pigment biosynthetic process	GO:0046148	0.272	0.402	0	0	0	0	Iba57|1	1	135	126	53607	http://www.ebi.ac.uk/QuickGO/GTerm?id=GO:0046148	[]
6	5,6	mitotic cytokinesis	GO:0000281	0.272	0.402	0	0	0	0	Sptbn1|1	1	135	126	53607	http://www.ebi.ac.uk/QuickGO/GTerm?id=GO:0000281	[]
5	4,5	maternal process involved in female pregnancy	GO:0060135	0.272	0.402	0	0	0	0	Prdx3|1	1	135	126	53607	http://www.ebi.ac.uk/QuickGO/GTerm?id=GO:0060135	[]
8	5,8	retina morphogenesis in camera-type eye	GO:0060042	0.272	0.402	0	0	0	0	Calb1|1	1	135	126	53607	http://www.ebi.ac.uk/QuickGO/GTerm?id=GO:0060042	[]
7	7	apical junction assembly	GO:0043297	0.274	0.405	0	0	0	0	Rock2|1	1	136	126	53607	http://www.ebi.ac.uk/QuickGO/GTerm?id=GO:0043297	[]
6	5,6	cellular senescence	GO:0090398	0.274	0.405	0	0	0	0	Calr|1	1	136	126	53607	http://www.ebi.ac.uk/QuickGO/GTerm?id=GO:0090398	[]
8	7,8	regulation of protein deacetylation	GO:0090311	0.276	0.406	0	0	0	0	Ep300|1	1	137	126	53607	http://www.ebi.ac.uk/QuickGO/GTerm?id=GO:0090311	[]
6	4,5,6	positive regulation of actin filament bundle assembly	GO:0032233	0.276	0.406	0	0	0	0	Rac1|1	1	137	126	53607	http://www.ebi.ac.uk/QuickGO/GTerm?id=GO:0032233	[]
6	5,6	positive regulation of dendritic spine development	GO:0060999	0.276	0.406	0	0	0	0	Rac1|1	1	137	126	53607	http://www.ebi.ac.uk/QuickGO/GTerm?id=GO:0060999	[]
8	6,7,8	positive regulation of NIK/NF-kappaB signaling	GO:1901224	0.276	0.406	0	0	0	0	Calr|1	1	137	126	53607	http://www.ebi.ac.uk/QuickGO/GTerm?id=GO:1901224	[]
3	3	positive regulation of signaling	GO:0023056	0.276	0.406	0	0	0	0	Dbi|1;Cyfip1|1;Rock2|1;Ube2o|1;Ppp3ca|1;Glud1|1;Abat|1;Hsp90ab1|1;Calb1|1;Vsnl1|1;Calr|1	11	3782	126	53607	http://www.ebi.ac.uk/QuickGO/GTerm?id=GO:0023056	[]
[truncated: 943 more rows]

## Sheet: Cell Composition
Table S3. Gene Ontology (GO) classification of acetylated proteins according to cell composition
maxLevel	levels	GO_Name	GO_ID	Pvalue	Pvalue_adjusted	Genes	Count	Pop_Hit	List_Total	Background_Genes	URL
6	5,6	mitochondrion	GO:0005739	2.23e-37	1.11e-34	Ywhaz|1;Dbi|1;Atp5j|1;Mcee|1;Tfam|1;Fam136a|1;Cltc|1;Slc25a3|1;Etfdh|1;Idh2|1;Atp5d|1;Aco2|1;Ppa2|1;Lrpprc|1;Lypla1|1;Aldh5a1|1;Clybl|1;Immt|1;Ldha|1;Atp5h|1;Acot9|1;Dnajc5|1;Ndufc2|1;Aldh1l1|1;Sdha|1;Prdx3|1;Gpd2|1;Sucla2|1;Ppp3ca|1;Uqcrb|1;Pcca|1;Ndufa5|1;Glud1|1;Atp5f1|1;Got2|1;Abat|1;Atp5o|1;Pdhx|1;Ogdhl|1;Pdk1|1;Ywhae|1;Iba57|1;Dlat|1;Fahd1|1;Dld|1;Cyb5r1|1;Mccc1|1;Cs|1;Cnp|1;Aldh7a1|1;Uqcr1…	65	4562	129	58353	http://www.ebi.ac.uk/QuickGO/GTerm?id=GO:0005739
4	4	extracellular exosome	GO:0070062	8.99e-33	1.65e-30	Ywhaq|1;Ywhaz|1;Pabpc1|1;H2afz|1;Dbi|1;H2afj|1;Taldo1|1;Sept11|1;Ywhag|1;Hnrnpa2b1|1;Psat1|1;Cltc|1;Negr1|1;Slc25a3|1;Cyfip1|1;Idh2|1;Ppa2|1;Ptges3|1;Lypla1|1;Ldha|1;Atp5h|1;Dnajc5|1;Aldh1l1|1;Prdx3|1;Sptbn1|1;Sucla2|1;Gnai1|1;Atp5f1|1;Calml3|1;Got2|1;Abat|1;Atp5o|1;Atp2b1|1;Hba|1;Eef2|1;Anxa5|1;Ywhae|1;Eno1|1;H2afy2|1;Pygb|1;Atp6v0a1|1;Cyb5r1|1;Cs|1;Hnrnpm|1;Cnp|1;Aldh7a1|1;Uqcr10|1;Anxa6|1;Nduf…	67	5886	129	58353	http://www.ebi.ac.uk/QuickGO/GTerm?id=GO:0070062
3	3	extracellular vesicle	GO:1903561	1.3e-32	1.65e-30	Ywhaq|1;Ywhaz|1;Pabpc1|1;H2afz|1;Dbi|1;H2afj|1;Taldo1|1;Sept11|1;Ywhag|1;Hnrnpa2b1|1;Psat1|1;Cltc|1;Negr1|1;Slc25a3|1;Cyfip1|1;Idh2|1;Ppa2|1;Ptges3|1;Lypla1|1;Ldha|1;Atp5h|1;Dnajc5|1;Aldh1l1|1;Prdx3|1;Sptbn1|1;Sucla2|1;Gnai1|1;Atp5f1|1;Calml3|1;Got2|1;Abat|1;Atp5o|1;Atp2b1|1;Hba|1;Eef2|1;Anxa5|1;Ywhae|1;Eno1|1;H2afy2|1;Pygb|1;Atp6v0a1|1;Cyb5r1|1;Cs|1;Hnrnpm|1;Cnp|1;Aldh7a1|1;Uqcr10|1;Anxa6|1;Nduf…	67	5922	129	58353	http://www.ebi.ac.uk/QuickGO/GTerm?id=GO:1903561
3	3	myelin sheath	GO:0043209	1.43e-32	1.65e-30	Ywhag|1;Hbb-b1|1;Cltc|1;Slc25a3|1;Aco2|1;Immt|1;Atp5h|1;Sdha|1;Prdx3|1;Gnao1|1;Sucla2|1;Atp5f1|1;Got2|1;Atp5o|1;Hba|1;Eno1|1;Dlat|1;Sept8|1;Syn1|1;Dld|1;Cnp|1;Ass1|1;Atp5a1|1;Hspd1|1;Hspa9|1;Pdha1|1;Fam213b|1;Mdh1|1	28	441	129	58353	http://www.ebi.ac.uk/QuickGO/GTerm?id=GO:0043209
3	3	extracellular organelle	GO:0043230	1.66e-32	1.65e-30	Ywhaq|1;Ywhaz|1;Pabpc1|1;H2afz|1;Dbi|1;H2afj|1;Taldo1|1;Sept11|1;Ywhag|1;Hnrnpa2b1|1;Psat1|1;Cltc|1;Negr1|1;Slc25a3|1;Cyfip1|1;Idh2|1;Ppa2|1;Ptges3|1;Lypla1|1;Ldha|1;Atp5h|1;Dnajc5|1;Aldh1l1|1;Prdx3|1;Sptbn1|1;Sucla2|1;Gnai1|1;Atp5f1|1;Calml3|1;Got2|1;Abat|1;Atp5o|1;Atp2b1|1;Hba|1;Eef2|1;Anxa5|1;Ywhae|1;Eno1|1;H2afy2|1;Pygb|1;Atp6v0a1|1;Cyb5r1|1;Cs|1;Hnrnpm|1;Cnp|1;Aldh7a1|1;Uqcr10|1;Anxa6|1;Nduf…	67	5946	129	58353	http://www.ebi.ac.uk/QuickGO/GTerm?id=GO:0043230
4	4	extracellular membrane-bounded organelle	GO:0065010	1.11e-30	9.19e-29	Ywhaq|1;Ywhaz|1;Pabpc1|1;H2afz|1;Dbi|1;H2afj|1;Taldo1|1;Sept11|1;Ywhag|1;Psat1|1;Cltc|1;Negr1|1;Slc25a3|1;Cyfip1|1;Idh2|1;Ppa2|1;Ptges3|1;Lypla1|1;Ldha|1;Atp5h|1;Dnajc5|1;Aldh1l1|1;Prdx3|1;Sptbn1|1;Sucla2|1;Gnai1|1;Atp5f1|1;Calml3|1;Got2|1;Abat|1;Atp5o|1;Atp2b1|1;Eef2|1;Anxa5|1;Ywhae|1;H2afy2|1;Pygb|1;Atp6v0a1|1;Cyb5r1|1;Cs|1;Hnrnpm|1;Cnp|1;Aldh7a1|1;Uqcr10|1;Anxa6|1;Ndufb4|1;Acat1|1;Basp1|1;Sat2…	64	5696	129	58353	http://www.ebi.ac.uk/QuickGO/GTerm?id=GO:0065010
5	5	membrane-bounded vesicle	GO:0031988	4.95e-29	3.51e-27	Ywhaq|1;Ywhaz|1;Pabpc1|1;H2afz|1;Dbi|1;H2afj|1;Taldo1|1;Sept11|1;Ywhag|1;Psat1|1;Cltc|1;Negr1|1;Slc25a3|1;Cyfip1|1;Idh2|1;Ppa2|1;Ptges3|1;Lypla1|1;Ldha|1;Atp5h|1;Dnajc5|1;Aldh1l1|1;Prdx3|1;Sptbn1|1;Sucla2|1;Gnai1|1;Atp5f1|1;Calml3|1;Got2|1;Abat|1;Atp5o|1;Atp2b1|1;Eef2|1;Anxa5|1;Ywhae|1;H2afy2|1;Syn1|1;Pygb|1;Atp6v0a1|1;Dld|1;Cyb5r1|1;Cs|1;Hnrnpm|1;Cnp|1;Aldh7a1|1;Uqcr10|1;Anxa6|1;Sept5|1;Ndufb4|1…	69	7289	129	58353	http://www.ebi.ac.uk/QuickGO/GTerm?id=GO:0031988
5	4,5	cytoplasmic part	GO:0044444	1.28e-28	7.96e-27	Ywhaq|1;Ywhaz|1;Pabpc1|1;Ptms|1;Ep300|1;Dbi|1;Spta1|1;Taldo1|1;Atp5j|1;Ywhag|1;Hbb-b1|1;Mcee|1;Afp|1;Tfam|1;Fam136a|1;Hnrnpa2b1|1;Psat1|1;Cltc|1;Slc25a3|1;Cyfip1|1;Etfdh|1;Idh2|1;Atp5d|1;Rock2|1;Taf6|1;Aco2|1;Ppa2|1;Ptges3|1;Lrpprc|1;Lypla1|1;Aldh5a1|1;Clybl|1;Immt|1;Ldha|1;Atp5h|1;Acot9|1;Dnajc5|1;Ndufc2|1;Aldh1l1|1;Sdha|1;Prdx3|1;Ube2o|1;Decr2|1;Sptbn1|1;Gpd2|1;Sucla2|1;Gnai1|1;Ppp3ca|1;Uqcrb|1…	106	20186	129	58353	http://www.ebi.ac.uk/QuickGO/GTerm?id=GO:0044444
4	4	vesicle	GO:0031982	1.54e-26	7.66e-25	Ywhaq|1;Ywhaz|1;Pabpc1|1;H2afz|1;Dbi|1;H2afj|1;Taldo1|1;Sept11|1;Ywhag|1;Hnrnpa2b1|1;Psat1|1;Cltc|1;Negr1|1;Slc25a3|1;Cyfip1|1;Idh2|1;Ppa2|1;Ptges3|1;Lypla1|1;Ldha|1;Atp5h|1;Dnajc5|1;Aldh1l1|1;Prdx3|1;Sptbn1|1;Sucla2|1;Gnai1|1;Atp5f1|1;Calml3|1;Got2|1;Abat|1;Atp5o|1;Atp2b1|1;Hba|1;Eef2|1;Anxa5|1;Ywhae|1;Eno1|1;H2afy2|1;Syn1|1;Pygb|1;Atp6v0a1|1;Dld|1;Cyb5r1|1;Cs|1;Hnrnpm|1;Cnp|1;Aldh7a1|1;Uqcr10|1…	72	8833	129	58353	http://www.ebi.ac.uk/QuickGO/GTerm?id=GO:0031982
5	4,5	mitochondrial part	GO:0044429	1.54e-26	7.66e-25	Atp5j|1;Tfam|1;Slc25a3|1;Etfdh|1;Idh2|1;Atp5d|1;Lrpprc|1;Immt|1;Atp5h|1;Ndufc2|1;Sdha|1;Gpd2|1;Uqcrb|1;Pcca|1;Ndufa5|1;Glud1|1;Atp5f1|1;Got2|1;Abat|1;Atp5o|1;Pdhx|1;Pdk1|1;Iba57|1;Dlat|1;Fahd1|1;Dld|1;Mccc1|1;Cs|1;Cnp|1;Uqcr10|1;Ndufb4|1;Acat1|1;Atp5e|1;Cisd1|1;Ass1|1;Atp5a1|1;Hspd1|1;Hspa9|1;Pdha1|1	39	1946	129	58353	http://www.ebi.ac.uk/QuickGO/GTerm?id=GO:0044429
4	4	cytoplasm	GO:0005737	1.17e-24	5.28e-23	Ywhaq|1;Ywhaz|1;Pabpc1|1;Ptms|1;Ep300|1;Dbi|1;Spta1|1;Hnrnpa1|1;Taldo1|1;Atp5j|1;Sept11|1;Ywhag|1;Hbb-b1|1;Mcee|1;Afp|1;Tfam|1;Fam136a|1;Hmgn2|1;Hnrnpa2b1|1;Psat1|1;Cltc|1;Slc25a3|1;Cyfip1|1;Etfdh|1;Idh2|1;Atp5d|1;Rock2|1;Taf6|1;Aco2|1;Ppa2|1;Ptges3|1;Lrpprc|1;Lypla1|1;Aldh5a1|1;Clybl|1;Immt|1;Ldha|1;Atp5h|1;Acot9|1;Dnajc5|1;Ndufc2|1;Aldh1l1|1;Sdha|1;Prdx3|1;Ube2o|1;Decr2|1;Sptbn1|1;Gpd2|1;Sucla2…	115	27026	129	58353	http://www.ebi.ac.uk/QuickGO/GTerm?id=GO:0005737
2	2	extracellular region part	GO:0044421	5.46e-23	2.26e-21	Ywhaq|1;Ywhaz|1;Pabpc1|1;H2afz|1;Dbi|1;H2afj|1;Taldo1|1;Sept11|1;Ywhag|1;Afp|1;Hnrnpa2b1|1;Psat1|1;Cltc|1;Negr1|1;Slc25a3|1;Cyfip1|1;Idh2|1;Ppa2|1;Ptges3|1;Lypla1|1;Ldha|1;Atp5h|1;Dnajc5|1;Aldh1l1|1;Prdx3|1;Sptbn1|1;Sucla2|1;Gnai1|1;Atp5f1|1;Calml3|1;Got2|1;Abat|1;Atp5o|1;Atp2b1|1;Hba|1;Eef2|1;Anxa5|1;Ywhae|1;Eno1|1;H2afy2|1;Pygb|1;Atp6v0a1|1;Cyb5r1|1;Cs|1;Hnrnpm|1;Cnp|1;Aldh7a1|1;Uqcr10|1;Anxa6|…	68	8918	129	58353	http://www.ebi.ac.uk/QuickGO/GTerm?id=GO:0044421
3	3	membrane-bounded organelle	GO:0043227	1.95e-21	7.45e-20	Ywhaq|1;Cbx1|1;Ywhaz|1;Pabpc1|1;H2afz|1;Ep300|1;Dbi|1;H2afj|1;Hnrnpa1|1;Taldo1|1;Atp5j|1;Sept11|1;Ywhag|1;Mcee|1;Tfam|1;Fam136a|1;Hmgn2|1;Hnrnpa2b1|1;Psat1|1;Cltc|1;Negr1|1;H3f3c|1;Slc25a3|1;Cyfip1|1;Jade3|1;Etfdh|1;Idh2|1;Atp5d|1;Rock2|1;Taf6|1;Aco2|1;Ppa2|1;Ptges3|1;Lrpprc|1;Lypla1|1;Aldh5a1|1;Clybl|1;Immt|1;Ldha|1;Atp5h|1;Acot9|1;Dnajc5|1;Ndufc2|1;Aldh1l1|1;Sdha|1;Prdx3|1;Ube2o|1;Decr2|1;Sptbn…	119	31584	129	58353	http://www.ebi.ac.uk/QuickGO/GTerm?id=GO:0043227
2	2	extracellular region	GO:0005576	1.19e-19	4.21e-18	Ywhaq|1;Ywhaz|1;Pabpc1|1;H2afz|1;Dbi|1;H2afj|1;Taldo1|1;Sept11|1;Ywhag|1;Afp|1;Hnrnpa2b1|1;Psat1|1;Cltc|1;Negr1|1;Slc25a3|1;Cyfip1|1;Idh2|1;Ppa2|1;Ptges3|1;Lypla1|1;Ldha|1;Atp5h|1;Dnajc5|1;Aldh1l1|1;Prdx3|1;Sptbn1|1;Sucla2|1;Gnai1|1;Atp5f1|1;Calml3|1;Got2|1;Abat|1;Atp5o|1;Atp2b1|1;Hba|1;Eef2|1;Anxa5|1;Ywhae|1;Eno1|1;H2afy2|1;Pygb|1;Atp6v0a1|1;Cyb5r1|1;Cs|1;Hnrnpm|1;Cnp|1;Aldh7a1|1;Uqcr10|1;Anxa6|…	68	10216	129	58353	http://www.ebi.ac.uk/QuickGO/GTerm?id=GO:0005576
4	4	mitochondrial protein complex	GO:0098798	1.28e-19	4.24e-18	Atp5j|1;Etfdh|1;Atp5d|1;Immt|1;Atp5h|1;Ndufc2|1;Sdha|1;Uqcrb|1;Ndufa5|1;Atp5f1|1;Atp5o|1;Pdk1|1;Dlat|1;Mccc1|1;Uqcr10|1;Ndufb4|1;Atp5e|1;Atp5a1|1	18	346	129	58353	http://www.ebi.ac.uk/QuickGO/GTerm?id=GO:0098798
3	3	intracellular part	GO:0044424	1.6e-19	4.96e-18	Ywhaq|1;Cbx1|1;Ywhaz|1;Pabpc1|1;Ptms|1;H2afz|1;Ep300|1;Dbi|1;Spta1|1;H2afj|1;Hnrnpa1|1;Taldo1|1;Atp5j|1;Sept11|1;Ywhag|1;Hbb-b1|1;Mcee|1;Afp|1;Tfam|1;Fam136a|1;Hmgn2|1;Hnrnpa2b1|1;Psat1|1;Cltc|1;H3f3c|1;Slc25a3|1;Cyfip1|1;Jade3|1;Etfdh|1;Idh2|1;Atp5d|1;Rock2|1;Taf6|1;Aco2|1;Ppa2|1;Ptges3|1;Lrpprc|1;Lypla1|1;Aldh5a1|1;Clybl|1;Immt|1;Ldha|1;Atp5h|1;Acot9|1;Dnajc5|1;Ndufc2|1;Aldh1l1|1;Sdha|1;Prdx3|1…	125	37468	129	58353	http://www.ebi.ac.uk/QuickGO/GTerm?id=GO:0044424
2	2	organelle	GO:0043226	2.16e-19	6.3e-18	Ywhaq|1;Cbx1|1;Ywhaz|1;Pabpc1|1;H2afz|1;Ep300|1;Dbi|1;Spta1|1;H2afj|1;Hnrnpa1|1;Taldo1|1;Atp5j|1;Sept11|1;Ywhag|1;Mcee|1;Tfam|1;Fam136a|1;Hmgn2|1;Hnrnpa2b1|1;Psat1|1;Cltc|1;Negr1|1;H3f3c|1;Slc25a3|1;Cyfip1|1;Jade3|1;Etfdh|1;Idh2|1;Atp5d|1;Rock2|1;Taf6|1;Aco2|1;Ppa2|1;Ptges3|1;Lrpprc|1;Lypla1|1;Aldh5a1|1;Clybl|1;Immt|1;Ldha|1;Atp5h|1;Acot9|1;Dnajc5|1;Ndufc2|1;Aldh1l1|1;Sdha|1;Prdx3|1;Ube2o|1;Decr2…	122	35140	129	58353	http://www.ebi.ac.uk/QuickGO/GTerm?id=GO:0043226
5	5	mitochondrial inner membrane	GO:0005743	8.72e-19	2.41e-17	Atp5j|1;Slc25a3|1;Etfdh|1;Idh2|1;Atp5d|1;Immt|1;Atp5h|1;Ndufc2|1;Sdha|1;Gpd2|1;Uqcrb|1;Ndufa5|1;Glud1|1;Atp5f1|1;Got2|1;Atp5o|1;Fahd1|1;Mccc1|1;Cnp|1;Uqcr10|1;Ndufb4|1;Acat1|1;Atp5e|1;Atp5a1|1;Hspd1|1	25	1046	129	58353	http://www.ebi.ac.uk/QuickGO/GTerm?id=GO:0005743
4	4	organelle inner membrane	GO:0019866	1.53e-18	3.99e-17	Atp5j|1;Slc25a3|1;Etfdh|1;Idh2|1;Atp5d|1;Lrpprc|1;Immt|1;Atp5h|1;Ndufc2|1;Sdha|1;Gpd2|1;Uqcrb|1;Ndufa5|1;Glud1|1;Atp5f1|1;Got2|1;Atp5o|1;Fahd1|1;Mccc1|1;Cnp|1;Uqcr10|1;Ndufb4|1;Acat1|1;Atp5e|1;Atp5a1|1;Hspd1|1	26	1193	129	58353	http://www.ebi.ac.uk/QuickGO/GTerm?id=GO:0019866
7	4,6,7	mitochondrial membrane	GO:0031966	1.46e-17	3.62e-16	Atp5j|1;Slc25a3|1;Etfdh|1;Idh2|1;Atp5d|1;Immt|1;Atp5h|1;Ndufc2|1;Sdha|1;Gpd2|1;Uqcrb|1;Ndufa5|1;Glud1|1;Atp5f1|1;Got2|1;Atp5o|1;Fahd1|1;Mccc1|1;Cnp|1;Uqcr10|1;Ndufb4|1;Acat1|1;Atp5e|1;Cisd1|1;Ass1|1;Atp5a1|1;Hspd1|1	27	1446	129	58353	http://www.ebi.ac.uk/QuickGO/GTerm?id=GO:0031966
5	4,5	intracellular membrane-bounded organelle	GO:0043231	4.43e-17	1.05e-15	Ywhaq|1;Cbx1|1;Ywhaz|1;Pabpc1|1;H2afz|1;Ep300|1;Dbi|1;H2afj|1;Hnrnpa1|1;Taldo1|1;Atp5j|1;Ywhag|1;Mcee|1;Tfam|1;Fam136a|1;Hmgn2|1;Hnrnpa2b1|1;Cltc|1;H3f3c|1;Slc25a3|1;Jade3|1;Etfdh|1;Idh2|1;Atp5d|1;Rock2|1;Taf6|1;Aco2|1;Ppa2|1;Ptges3|1;Lrpprc|1;Lypla1|1;Aldh5a1|1;Clybl|1;Immt|1;Ldha|1;Atp5h|1;Acot9|1;Dnajc5|1;Ndufc2|1;Aldh1l1|1;Sdha|1;Prdx3|1;Ube2o|1;Decr2|1;Sptbn1|1;Gpd2|1;Sucla2|1;Gnai1|1;Ppp3ca…	109	28638	129	58353	http://www.ebi.ac.uk/QuickGO/GTerm?id=GO:0043231
6	5,6	mitochondrial envelope	GO:0005740	6.16e-17	1.39e-15	Atp5j|1;Slc25a3|1;Etfdh|1;Idh2|1;Atp5d|1;Immt|1;Atp5h|1;Ndufc2|1;Sdha|1;Gpd2|1;Uqcrb|1;Ndufa5|1;Glud1|1;Atp5f1|1;Got2|1;Atp5o|1;Fahd1|1;Mccc1|1;Cnp|1;Uqcr10|1;Ndufb4|1;Acat1|1;Atp5e|1;Cisd1|1;Ass1|1;Atp5a1|1;Hspd1|1	27	1533	129	58353	http://www.ebi.ac.uk/QuickGO/GTerm?id=GO:0005740
3	3	intracellular	GO:0005622	2.48e-16	5.36e-15	Ywhaq|1;Cbx1|1;Ywhaz|1;Pabpc1|1;Ptms|1;H2afz|1;Ep300|1;Dbi|1;Spta1|1;H2afj|1;Hnrnpa1|1;Taldo1|1;Atp5j|1;Sept11|1;Ywhag|1;Hbb-b1|1;Mcee|1;Afp|1;Tfam|1;Fam136a|1;Hmgn2|1;Hnrnpa2b1|1;Psat1|1;Cltc|1;H3f3c|1;Slc25a3|1;Cyfip1|1;Jade3|1;Etfdh|1;Idh2|1;Atp5d|1;Rock2|1;Taf6|1;Aco2|1;Ppa2|1;Ptges3|1;Lrpprc|1;Lypla1|1;Aldh5a1|1;Clybl|1;Immt|1;Ldha|1;Atp5h|1;Acot9|1;Dnajc5|1;Ndufc2|1;Aldh1l1|1;Sdha|1;Prdx3|1…	125	39886	129	58353	http://www.ebi.ac.uk/QuickGO/GTerm?id=GO:0005622
6	5,6	mitochondrial matrix	GO:0005759	4.25e-16	8.81e-15	Tfam|1;Etfdh|1;Lrpprc|1;Pcca|1;Glud1|1;Got2|1;Abat|1;Pdhx|1;Pdk1|1;Iba57|1;Dlat|1;Dld|1;Mccc1|1;Cs|1;Acat1|1;Hspd1|1;Hspa9|1;Pdha1|1	18	549	129	58353	http://www.ebi.ac.uk/QuickGO/GTerm?id=GO:0005759
4	3,4	intracellular organelle	GO:0043229	1.03e-15	2.05e-14	Ywhaq|1;Cbx1|1;Ywhaz|1;Pabpc1|1;H2afz|1;Ep300|1;Dbi|1;Spta1|1;H2afj|1;Hnrnpa1|1;Taldo1|1;Atp5j|1;Sept11|1;Ywhag|1;Mcee|1;Tfam|1;Fam136a|1;Hmgn2|1;Hnrnpa2b1|1;Cltc|1;H3f3c|1;Slc25a3|1;Jade3|1;Etfdh|1;Idh2|1;Atp5d|1;Rock2|1;Taf6|1;Aco2|1;Ppa2|1;Ptges3|1;Lrpprc|1;Lypla1|1;Aldh5a1|1;Clybl|1;Immt|1;Ldha|1;Atp5h|1;Acot9|1;Dnajc5|1;Ndufc2|1;Aldh1l1|1;Sdha|1;Prdx3|1;Ube2o|1;Decr2|1;Sptbn1|1;Gpd2|1;Sucla2…	114	32554	129	58353	http://www.ebi.ac.uk/QuickGO/GTerm?id=GO:0043229
4	4	inner mitochondrial membrane protein complex	GO:0098800	4.15e-15	7.93e-14	Atp5j|1;Atp5d|1;Immt|1;Atp5h|1;Ndufc2|1;Sdha|1;Uqcrb|1;Ndufa5|1;Atp5f1|1;Atp5o|1;Uqcr10|1;Ndufb4|1;Atp5e|1;Atp5a1|1	14	287	129	58353	http://www.ebi.ac.uk/QuickGO/GTerm?id=GO:0098800
3	3	organelle membrane	GO:0031090	4.38e-15	8.06e-14	Ywhaq|1;Ywhaz|1;Atp5j|1;Ywhag|1;Cltc|1;Slc25a3|1;Etfdh|1;Idh2|1;Atp5d|1;Lrpprc|1;Immt|1;Atp5h|1;Dnajc5|1;Ndufc2|1;Sdha|1;Decr2|1;Gpd2|1;Gnai1|1;Uqcrb|1;Ndufa5|1;Glud1|1;Atp5f1|1;Got2|1;Atp5o|1;Ywhae|1;Sptlc3|1;Fahd1|1;Syn1|1;Atp6v0a1|1;Mccc1|1;Cnp|1;Uqcr10|1;Anxa6|1;Ndufb4|1;Acat1|1;Copa|1;Atp5e|1;Hsp90ab1|1;Cisd1|1;Ass1|1;Atp5a1|1;Rac1|1;Hspd1|1;Amph|1;Slc32a1|1;Calr|1	46	5846	129	58353	http://www.ebi.ac.uk/QuickGO/GTerm?id=GO:0031090
3	3	mitochondrial membrane part	GO:0044455	4.85e-15	8.62e-14	Atp5j|1;Etfdh|1;Atp5d|1;Immt|1;Atp5h|1;Ndufc2|1;Sdha|1;Uqcrb|1;Ndufa5|1;Atp5f1|1;Atp5o|1;Uqcr10|1;Ndufb4|1;Atp5e|1;Atp5a1|1;Hspd1|1	16	445	129	58353	http://www.ebi.ac.uk/QuickGO/GTerm?id=GO:0044455
2	2	organelle part	GO:0044422	1.74e-14	2.98e-13	Ywhaq|1;Cbx1|1;Ywhaz|1;Pabpc1|1;H2afz|1;Ep300|1;Dbi|1;Spta1|1;H2afj|1;Hnrnpa1|1;Taldo1|1;Atp5j|1;Sept11|1;Ywhag|1;Tfam|1;Hmgn2|1;Hnrnpa2b1|1;Cltc|1;H3f3c|1;Slc25a3|1;Jade3|1;Etfdh|1;Idh2|1;Atp5d|1;Rock2|1;Taf6|1;Ptges3|1;Lrpprc|1;Immt|1;Ldha|1;Atp5h|1;Dnajc5|1;Ndufc2|1;Sdha|1;Ube2o|1;Decr2|1;Sptbn1|1;Gpd2|1;Gnai1|1;Ppp3ca|1;Uqcrb|1;Pcca|1;Ndufa5|1;Glud1|1;Atp5f1|1;Got2|1;Abat|1;Atp5o|1;Pdhx|1;Hba…	89	20878	129	58353	http://www.ebi.ac.uk/QuickGO/GTerm?id=GO:0044422
4	4	neuron projection	GO:0043005	2.72e-14	4.5e-13	Pabpc1|1;Spta1|1;Sept11|1;Hnrnpa2b1|1;Cltc|1;Negr1|1;Cyfip1|1;Ptges3|1;Dnajc5|1;Gnao1|1;Sptbn1|1;Ppp3ca|1;Abat|1;Atp2b1|1;Anxa5|1;Ywhae|1;Eno1|1;Syn1|1;Pura|1;Pygb|1;Atp6v0a1|1;Sept5|1;Basp1|1;Hsp90ab1|1;Ass1|1;Slc1a2|1;Rac1|1;Sh3gl2|1;Amph|1;Epb41l3|1;Calb1|1;Slc32a1|1	32	2896	129	58353	http://www.ebi.ac.uk/QuickGO/GTerm?id=GO:0043005
6	5,6	cytosol	GO:0005829	2.9e-14	4.64e-13	Ywhaq|1;Ywhaz|1;Pabpc1|1;Ptms|1;Ep300|1;Taldo1|1;Ywhag|1;Hbb-b1|1;Afp|1;Psat1|1;Cltc|1;Idh2|1;Rock2|1;Taf6|1;Ptges3|1;Lypla1|1;Ldha|1;Atp5h|1;Aldh1l1|1;Prdx3|1;Ube2o|1;Ppp3ca|1;Hspa4l|1;Hba|1;Eef2|1;Ogdhl|1;Anxa5|1;Ywhae|1;Eno1|1;Fahd1|1;Syn1|1;Atp6v0a1|1;Cnp|1;Aldh7a1|1;Anxa6|1;Nt5dc3|1;Hsp90ab1|1;Ass1|1;Rac1|1;Sh3gl2|1;Hspd1|1;Calb1|1;Tpi1|1;Oplah|1;Fam213b|1;Vsnl1|1;Mdh1|1;Calr|1	48	6687	129	58353	http://www.ebi.ac.uk/QuickGO/GTerm?id=GO:0005829
4	3,4	intracellular organelle part	GO:0044446	4.08e-14	6.33e-13	Ywhaq|1;Cbx1|1;Ywhaz|1;Pabpc1|1;H2afz|1;Ep300|1;Dbi|1;Spta1|1;H2afj|1;Hnrnpa1|1;Taldo1|1;Atp5j|1;Sept11|1;Ywhag|1;Tfam|1;Hmgn2|1;Hnrnpa2b1|1;Cltc|1;H3f3c|1;Slc25a3|1;Jade3|1;Etfdh|1;Idh2|1;Atp5d|1;Rock2|1;Taf6|1;Ptges3|1;Lrpprc|1;Immt|1;Atp5h|1;Dnajc5|1;Ndufc2|1;Sdha|1;Ube2o|1;Decr2|1;Sptbn1|1;Gpd2|1;Gnai1|1;Ppp3ca|1;Uqcrb|1;Pcca|1;Ndufa5|1;Glud1|1;Atp5f1|1;Got2|1;Abat|1;Atp5o|1;Pdhx|1;Hba|1;Pdk1…	87	20287	129	58353	http://www.ebi.ac.uk/QuickGO/GTerm?id=GO:0044446
3	3	oxidoreductase complex	GO:1990204	9.29e-14	1.4e-12	Ndufc2|1;Sdha|1;Gpd2|1;Uqcrb|1;Ndufa5|1;Pdhx|1;Ogdhl|1;Pdk1|1;Dlat|1;Dld|1;Uqcr10|1;Ndufb4|1;Pdha1|1	13	284	129	58353	http://www.ebi.ac.uk/QuickGO/GTerm?id=GO:1990204
5	4,5	organelle envelope	GO:0031967	5.76e-13	8.42e-12	Atp5j|1;Slc25a3|1;Etfdh|1;Idh2|1;Atp5d|1;Lrpprc|1;Immt|1;Atp5h|1;Ndufc2|1;Sdha|1;Gpd2|1;Uqcrb|1;Ndufa5|1;Glud1|1;Atp5f1|1;Got2|1;Atp5o|1;Fahd1|1;Mccc1|1;Cnp|1;Uqcr10|1;Ndufb4|1;Acat1|1;Atp5e|1;Cisd1|1;Ass1|1;Atp5a1|1;Hspd1|1;Calr|1	29	2628	129	58353	http://www.ebi.ac.uk/QuickGO/GTerm?id=GO:0031967
3	3	envelope	GO:0031975	6.04e-13	8.58e-12	Atp5j|1;Slc25a3|1;Etfdh|1;Idh2|1;Atp5d|1;Lrpprc|1;Immt|1;Atp5h|1;Ndufc2|1;Sdha|1;Gpd2|1;Uqcrb|1;Ndufa5|1;Glud1|1;Atp5f1|1;Got2|1;Atp5o|1;Fahd1|1;Mccc1|1;Cnp|1;Uqcr10|1;Ndufb4|1;Acat1|1;Atp5e|1;Cisd1|1;Ass1|1;Atp5a1|1;Hspd1|1;Calr|1	29	2633	129	58353	http://www.ebi.ac.uk/QuickGO/GTerm?id=GO:0031975
3	3	neuron part	GO:0097458	7.57e-13	1.04e-11	Pabpc1|1;Dbi|1;Spta1|1;Sept11|1;Hnrnpa2b1|1;Cltc|1;Negr1|1;Cyfip1|1;Ptges3|1;Dnajc5|1;Gnao1|1;Sptbn1|1;Ppp3ca|1;Got2|1;Abat|1;Atp2b1|1;Anxa5|1;Ywhae|1;Eno1|1;Syn1|1;Pura|1;Pygb|1;Atp6v0a1|1;Top1|1;Sept5|1;Basp1|1;Hsp90ab1|1;Ass1|1;Slc1a2|1;Rac1|1;Sh3gl2|1;Amph|1;Epb41l3|1;Calb1|1;Slc32a1|1	35	3942	129	58353	http://www.ebi.ac.uk/QuickGO/GTerm?id=GO:0097458
2	2	macromolecular complex	GO:0032991	8.67e-12	1.16e-10	Ywhaq|1;Cbx1|1;Ywhaz|1;Pabpc1|1;H2afz|1;Ep300|1;H2afj|1;Hnrnpa1|1;Atp5j|1;Hbb-b1|1;Tfam|1;Hmgn2|1;Hnrnpa2b1|1;Cltc|1;H3f3c|1;Cyfip1|1;Jade3|1;Etfdh|1;Atp5d|1;Rock2|1;Taf6|1;Ptges3|1;Lrpprc|1;Immt|1;Atp5h|1;Ndufc2|1;Aldh1l1|1;Sdha|1;Prdx3|1;Gnao1|1;Sptbn1|1;Gpd2|1;Gnai1|1;Ppp3ca|1;Uqcrb|1;Ndufa5|1;Atp5f1|1;Got2|1;Abat|1;Atp5o|1;Pdhx|1;Hba|1;Eef2|1;Ogdhl|1;Pdk1|1;Ywhae|1;Sptlc3|1;Eno1|1;H2afy2|1;Dl…	71	15552	129	58353	http://www.ebi.ac.uk/QuickGO/GTerm?id=GO:0032991
6	4,5,6	pyruvate dehydrogenase complex	GO:0045254	2.23e-11	2.92e-10	Pdhx|1;Pdk1|1;Dlat|1;Dld|1;Pdha1|1	5	11	129	58353	http://www.ebi.ac.uk/QuickGO/GTerm?id=GO:0045254
5	5	mitochondrial proton-transporting ATP synthase complex	GO:0005753	7.67e-11	9.77e-10	Atp5j|1;Atp5d|1;Atp5h|1;Atp5f1|1;Atp5o|1;Atp5e|1;Atp5a1|1	7	60	129	58353	http://www.ebi.ac.uk/QuickGO/GTerm?id=GO:0005753
2	2	cell part	GO:0044464	1.2e-10	1.49e-09	Ywhaq|1;Cbx1|1;Ywhaz|1;Pabpc1|1;Ptms|1;H2afz|1;Ep300|1;Dbi|1;Spta1|1;H2afj|1;Hnrnpa1|1;Taldo1|1;Atp5j|1;Sept11|1;Ywhag|1;Hbb-b1|1;Mcee|1;Afp|1;Tfam|1;Fam136a|1;Hmgn2|1;Hnrnpa2b1|1;Psat1|1;Cltc|1;Negr1|1;H3f3c|1;Slc25a3|1;Cyfip1|1;Jade3|1;Etfdh|1;Idh2|1;Atp5d|1;Rock2|1;Taf6|1;Aco2|1;Ppa2|1;Ptges3|1;Lrpprc|1;Lypla1|1;Aldh5a1|1;Clybl|1;Immt|1;Ldha|1;Atp5h|1;Acot9|1;Dnajc5|1;Ndufc2|1;Aldh1l1|1;Sdha|1…	128	47621	129	58353	http://www.ebi.ac.uk/QuickGO/GTerm?id=GO:0044464
8	7,8	melanosome	GO:0042470	1.42e-10	1.68e-09	Ywhaz|1;Cltc|1;Dnajc5|1;Ywhae|1;Atp6v0a1|1;Cnp|1;Anxa6|1;Hsp90ab1|1;Rac1|1	9	165	129	58353	http://www.ebi.ac.uk/QuickGO/GTerm?id=GO:0042470
7	6,7	pigment granule	GO:0048770	1.42e-10	1.68e-09	Ywhaz|1;Cltc|1;Dnajc5|1;Ywhae|1;Atp6v0a1|1;Cnp|1;Anxa6|1;Hsp90ab1|1;Rac1|1	9	165	129	58353	http://www.ebi.ac.uk/QuickGO/GTerm?id=GO:0048770
2	2	synapse part	GO:0044456	2.14e-10	2.48e-09	Ywhaz|1;Dbi|1;Sept11|1;Cltc|1;Cyfip1|1;Dnajc5|1;Sptbn1|1;Ppp3ca|1;Atp2b1|1;Anxa5|1;Eno1|1;Syn1|1;Atp6v0a1|1;Psd3|1;Sept5|1;Slc1a2|1;Rac1|1;Sh3gl2|1;Amph|1;Epb41l3|1;Calb1|1;Slc32a1|1	22	1899	129	58353	http://www.ebi.ac.uk/QuickGO/GTerm?id=GO:0044456
2	2	cell	GO:0005623	2.41e-10	2.72e-09	Ywhaq|1;Cbx1|1;Ywhaz|1;Pabpc1|1;Ptms|1;H2afz|1;Ep300|1;Dbi|1;Spta1|1;H2afj|1;Hnrnpa1|1;Taldo1|1;Atp5j|1;Sept11|1;Ywhag|1;Hbb-b1|1;Mcee|1;Afp|1;Tfam|1;Fam136a|1;Hmgn2|1;Hnrnpa2b1|1;Psat1|1;Cltc|1;Negr1|1;H3f3c|1;Slc25a3|1;Cyfip1|1;Jade3|1;Etfdh|1;Idh2|1;Atp5d|1;Rock2|1;Taf6|1;Aco2|1;Ppa2|1;Ptges3|1;Lrpprc|1;Lypla1|1;Aldh5a1|1;Clybl|1;Immt|1;Ldha|1;Atp5h|1;Acot9|1;Dnajc5|1;Ndufc2|1;Aldh1l1|1;Sdha|1…	128	47890	129	58353	http://www.ebi.ac.uk/QuickGO/GTerm?id=GO:0005623
4	4	proton-transporting ATP synthase complex	GO:0045259	3.83e-10	4.23e-09	Atp5j|1;Atp5d|1;Atp5h|1;Atp5f1|1;Atp5o|1;Atp5e|1;Atp5a1|1	7	75	129	58353	http://www.ebi.ac.uk/QuickGO/GTerm?id=GO:0045259
3	3	protein complex	GO:0043234	1e-09	1.08e-08	Ywhaq|1;H2afz|1;Ep300|1;H2afj|1;Atp5j|1;Hbb-b1|1;Tfam|1;Cltc|1;H3f3c|1;Cyfip1|1;Jade3|1;Etfdh|1;Atp5d|1;Taf6|1;Ptges3|1;Lrpprc|1;Immt|1;Atp5h|1;Ndufc2|1;Sdha|1;Prdx3|1;Gnao1|1;Sptbn1|1;Gpd2|1;Gnai1|1;Ppp3ca|1;Uqcrb|1;Ndufa5|1;Atp5f1|1;Got2|1;Abat|1;Atp5o|1;Pdhx|1;Hba|1;Ogdhl|1;Pdk1|1;Ywhae|1;Sptlc3|1;Eno1|1;H2afy2|1;Dlat|1;Pura|1;Atp6v0a1|1;Dld|1;Mccc1|1;Cnp|1;Uqcr10|1;Top1|1;Sept5|1;Nt5dc3|1;Ndu…	60	12993	129	58353	http://www.ebi.ac.uk/QuickGO/GTerm?id=GO:0043234
4	4	axon part	GO:0033267	1.15e-09	1.22e-08	Cltc|1;Cyfip1|1;Dnajc5|1;Sptbn1|1;Syn1|1;Atp6v0a1|1;Sept5|1;Hsp90ab1|1;Slc1a2|1;Amph|1;Epb41l3|1;Calb1|1;Slc32a1|1	13	607	129	58353	http://www.ebi.ac.uk/QuickGO/GTerm?id=GO:0033267
5	5	axon	GO:0030424	1.54e-09	1.59e-08	Spta1|1;Sept11|1;Cltc|1;Cyfip1|1;Dnajc5|1;Sptbn1|1;Ywhae|1;Syn1|1;Pygb|1;Atp6v0a1|1;Sept5|1;Hsp90ab1|1;Slc1a2|1;Amph|1;Epb41l3|1;Calb1|1;Slc32a1|1	17	1200	129	58353	http://www.ebi.ac.uk/QuickGO/GTerm?id=GO:0030424
5	4,5	axon terminus	GO:0043679	1.87e-09	1.89e-08	Cltc|1;Cyfip1|1;Dnajc5|1;Anxa5|1;Syn1|1;Atp6v0a1|1;Sept5|1;Amph|1;Calb1|1;Slc32a1|1	10	305	129	58353	http://www.ebi.ac.uk/QuickGO/GTerm?id=GO:0043679
4	4	somatodendritic compartment	GO:0036477	3.26e-09	3.24e-08	Pabpc1|1;Sept11|1;Hnrnpa2b1|1;Negr1|1;Cyfip1|1;Ptges3|1;Gnao1|1;Ppp3ca|1;Got2|1;Atp2b1|1;Anxa5|1;Syn1|1;Pura|1;Top1|1;Hsp90ab1|1;Ass1|1;Slc1a2|1;Rac1|1;Sh3gl2|1;Calb1|1;Slc32a1|1	21	1999	129	58353	http://www.ebi.ac.uk/QuickGO/GTerm?id=GO:0036477
5	4,5	terminal bouton	GO:0043195	4.52e-09	4.41e-08	Cltc|1;Cyfip1|1;Dnajc5|1;Syn1|1;Atp6v0a1|1;Sept5|1;Amph|1;Calb1|1	8	168	129	58353	http://www.ebi.ac.uk/QuickGO/GTerm?id=GO:0043195
4	4	neuron projection terminus	GO:0044306	6.05e-09	5.78e-08	Cltc|1;Cyfip1|1;Dnajc5|1;Anxa5|1;Syn1|1;Atp6v0a1|1;Sept5|1;Amph|1;Calb1|1;Slc32a1|1	10	345	129	58353	http://www.ebi.ac.uk/QuickGO/GTerm?id=GO:0044306
4	4	catalytic complex	GO:1902494	6.41e-09	6.01e-08	Ep300|1;Jade3|1;Taf6|1;Ndufc2|1;Sdha|1;Prdx3|1;Gnao1|1;Gpd2|1;Gnai1|1;Ppp3ca|1;Uqcrb|1;Ndufa5|1;Abat|1;Pdhx|1;Ogdhl|1;Pdk1|1;Sptlc3|1;Eno1|1;H2afy2|1;Dlat|1;Dld|1;Mccc1|1;Uqcr10|1;Ndufb4|1;Hspd1|1;Pdha1|1	26	3177	129	58353	http://www.ebi.ac.uk/QuickGO/GTerm?id=GO:1902494
5	5	cytoplasmic, membrane-bounded vesicle	GO:0016023	7.26e-09	6.68e-08	Ywhaq|1;Ywhaz|1;Dbi|1;Ywhag|1;Cltc|1;Dnajc5|1;Anxa5|1;Ywhae|1;Syn1|1;Atp6v0a1|1;Dld|1;Cnp|1;Anxa6|1;Sept5|1;Copa|1;Hsp90ab1|1;Rac1|1;Hspd1|1;Amph|1;Slc32a1|1;Calr|1	21	2093	129	58353	http://www.ebi.ac.uk/QuickGO/GTerm?id=GO:0016023
2	2	synapse	GO:0045202	1.18e-08	1.07e-07	Ywhaz|1;Dbi|1;Sept11|1;Cltc|1;Cyfip1|1;Dnajc5|1;Sptbn1|1;Ppp3ca|1;Atp2b1|1;Anxa5|1;Eno1|1;Syn1|1;Atp6v0a1|1;Psd3|1;Sept5|1;Slc1a2|1;Rac1|1;Sh3gl2|1;Amph|1;Epb41l3|1;Calb1|1;Slc32a1|1	22	2365	129	58353	http://www.ebi.ac.uk/QuickGO/GTerm?id=GO:0045202
5	4,5	proton-transporting two-sector ATPase complex	GO:0016469	1.29e-08	1.14e-07	Atp5j|1;Atp5d|1;Atp5h|1;Atp5f1|1;Atp5o|1;Atp6v0a1|1;Atp5e|1;Atp5a1|1	8	192	129	58353	http://www.ebi.ac.uk/QuickGO/GTerm?id=GO:0016469
4	3,4	presynapse	GO:0098793	6.66e-08	5.81e-07	Dbi|1;Cltc|1;Cyfip1|1;Dnajc5|1;Anxa5|1;Syn1|1;Atp6v0a1|1;Sept5|1;Slc1a2|1;Sh3gl2|1;Amph|1;Calb1|1;Slc32a1|1	13	857	129	58353	http://www.ebi.ac.uk/QuickGO/GTerm?id=GO:0098793
5	5	dendrite	GO:0030425	1.01e-07	8.69e-07	Pabpc1|1;Sept11|1;Negr1|1;Cyfip1|1;Gnao1|1;Ppp3ca|1;Atp2b1|1;Anxa5|1;Syn1|1;Pura|1;Hsp90ab1|1;Slc1a2|1;Rac1|1;Sh3gl2|1;Calb1|1;Slc32a1|1	16	1409	129	58353	http://www.ebi.ac.uk/QuickGO/GTerm?id=GO:0030425
4	4	intracellular vesicle	GO:0097708	2.1e-07	1.77e-06	Ywhaq|1;Ywhaz|1;Dbi|1;Ywhag|1;Cltc|1;Dnajc5|1;Prdx3|1;Anxa5|1;Ywhae|1;Syn1|1;Atp6v0a1|1;Dld|1;Cnp|1;Anxa6|1;Sept5|1;Copa|1;Hsp90ab1|1;Rac1|1;Sh3gl2|1;Hspd1|1;Amph|1;Slc32a1|1;Calr|1	23	3030	129	58353	http://www.ebi.ac.uk/QuickGO/GTerm?id=GO:0097708
7	5,6,7	mitochondrial proton-transporting ATP synthase complex, catalytic core F(1)	GO:0000275	5.86e-07	4.86e-06	Atp5d|1;Atp5e|1;Atp5a1|1	3	8	129	58353	http://www.ebi.ac.uk/QuickGO/GTerm?id=GO:0000275
6	5,6	mitochondrial proton-transporting ATP synthase complex, coupling factor F(o)	GO:0000276	5.97e-07	4.87e-06	Atp5j|1;Atp5h|1;Atp5f1|1;Atp5o|1	4	30	129	58353	http://www.ebi.ac.uk/QuickGO/GTerm?id=GO:0000276
3	3	cell projection	GO:0042995	7.09e-07	5.68e-06	Sept11|1;Hnrnpa2b1|1;Negr1|1;Cyfip1|1;Ldha|1;Dnajc5|1;Gnao1|1;Sptbn1|1;Abat|1;Atp2b1|1;Anxa5|1;Ywhae|1;Syn1|1;Pura|1;Pygb|1;Dld|1;Cnp|1;Sept5|1;Basp1|1;Hsp90ab1|1;Slc1a2|1;Rac1|1;Epb41l3|1;Calb1|1;Slc32a1|1	25	3768	129	58353	http://www.ebi.ac.uk/QuickGO/GTerm?id=GO:0042995
5	4,5	proton-transporting two-sector ATPase complex, proton-transporting domain	GO:0033177	1.65e-06	1.3e-05	Atp5j|1;Atp5h|1;Atp5f1|1;Atp5o|1;Atp6v0a1|1	5	88	129	58353	http://www.ebi.ac.uk/QuickGO/GTerm?id=GO:0033177
5	4,5	intracellular organelle lumen	GO:0070013	2e-06	1.55e-05	Cbx1|1;H2afz|1;Ep300|1;H2afj|1;Hnrnpa1|1;Taldo1|1;Tfam|1;Hnrnpa2b1|1;Jade3|1;Etfdh|1;Taf6|1;Ptges3|1;Lrpprc|1;Atp5h|1;Sdha|1;Ube2o|1;Sptbn1|1;Gnai1|1;Ppp3ca|1;Pcca|1;Glud1|1;Atp5f1|1;Got2|1;Abat|1;Pdhx|1;Pdk1|1;Iba57|1;H2afy2|1;Dlat|1;Fahd1|1;Pura|1;Atp6v0a1|1;Dld|1;Mccc1|1;Cs|1;Hnrnpm|1;Cnp|1;Top1|1;Ndufb4|1;Acat1|1;Basp1|1;Hspd1|1;Hspa9|1;Pdha1|1;Macrod1|1;Calr|1	46	10637	129	58353	http://www.ebi.ac.uk/QuickGO/GTerm?id=GO:0070013
3	3	organelle lumen	GO:0043233	2.09e-06	1.6e-05	Cbx1|1;H2afz|1;Ep300|1;H2afj|1;Hnrnpa1|1;Taldo1|1;Tfam|1;Hnrnpa2b1|1;Jade3|1;Etfdh|1;Taf6|1;Ptges3|1;Lrpprc|1;Atp5h|1;Sdha|1;Ube2o|1;Sptbn1|1;Gnai1|1;Ppp3ca|1;Pcca|1;Glud1|1;Atp5f1|1;Got2|1;Abat|1;Pdhx|1;Pdk1|1;Iba57|1;H2afy2|1;Dlat|1;Fahd1|1;Pura|1;Atp6v0a1|1;Dld|1;Mccc1|1;Cs|1;Hnrnpm|1;Cnp|1;Top1|1;Ndufb4|1;Acat1|1;Basp1|1;Hspd1|1;Hspa9|1;Pdha1|1;Macrod1|1;Calr|1	46	10655	129	58353	http://www.ebi.ac.uk/QuickGO/GTerm?id=GO:0043233
4	4	proton-transporting ATP synthase complex, coupling factor F(o)	GO:0045263	2.17e-06	1.63e-05	Atp5j|1;Atp5h|1;Atp5f1|1;Atp5o|1	4	41	129	58353	http://www.ebi.ac.uk/QuickGO/GTerm?id=GO:0045263
2	2	membrane-enclosed lumen	GO:0031974	2.3e-06	1.7e-05	Cbx1|1;H2afz|1;Ep300|1;H2afj|1;Hnrnpa1|1;Taldo1|1;Tfam|1;Hnrnpa2b1|1;Jade3|1;Etfdh|1;Taf6|1;Ptges3|1;Lrpprc|1;Atp5h|1;Sdha|1;Ube2o|1;Sptbn1|1;Gnai1|1;Ppp3ca|1;Pcca|1;Glud1|1;Atp5f1|1;Got2|1;Abat|1;Pdhx|1;Pdk1|1;Iba57|1;H2afy2|1;Dlat|1;Fahd1|1;Pura|1;Atp6v0a1|1;Dld|1;Mccc1|1;Cs|1;Hnrnpm|1;Cnp|1;Top1|1;Ndufb4|1;Acat1|1;Basp1|1;Hspd1|1;Hspa9|1;Pdha1|1;Macrod1|1;Calr|1	46	10690	129	58353	http://www.ebi.ac.uk/QuickGO/GTerm?id=GO:0031974
8	5,7,8	exocytic vesicle	GO:0070382	2.4e-06	1.75e-05	Dbi|1;Dnajc5|1;Anxa5|1;Syn1|1;Atp6v0a1|1;Sept5|1;Amph|1;Slc32a1|1	8	382	129	58353	http://www.ebi.ac.uk/QuickGO/GTerm?id=GO:0070382
4	4	mitochondrial respiratory chain	GO:0005746	2.8e-06	2.02e-05	Ndufc2|1;Sdha|1;Uqcrb|1;Ndufa5|1;Uqcr10|1;Ndufb4|1	6	175	129	58353	http://www.ebi.ac.uk/QuickGO/GTerm?id=GO:0005746
2	2	cell junction	GO:0030054	3.11e-06	2.21e-05	Ywhaq|1;Ywhaz|1;Pabpc1|1;Sept11|1;Ywhag|1;Cltc|1;Negr1|1;Cyfip1|1;Ppp3ca|1;Atp2b1|1;Anxa5|1;Ywhae|1;Syn1|1;Psd3|1;Anxa6|1;Basp1|1;Rac1|1;Hspa9|1;Amph|1;Epb41l3|1;Calr|1	21	3024	129	58353	http://www.ebi.ac.uk/QuickGO/GTerm?id=GO:0030054
6	5,6	cytoplasmic vesicle	GO:0031410	3.49e-06	2.44e-05	Ywhaq|1;Ywhaz|1;Dbi|1;Ywhag|1;Cltc|1;Dnajc5|1;Prdx3|1;Anxa5|1;Ywhae|1;Syn1|1;Atp6v0a1|1;Dld|1;Cnp|1;Anxa6|1;Sept5|1;Copa|1;Hsp90ab1|1;Rac1|1;Sh3gl2|1;Hspd1|1;Amph|1;Slc32a1|1;Calr|1	23	3571	129	58353	http://www.ebi.ac.uk/QuickGO/GTerm?id=GO:0031410
6	5,6	focal adhesion	GO:0005925	4.99e-06	3.44e-05	Ywhaq|1;Ywhaz|1;Pabpc1|1;Ywhag|1;Cltc|1;Cyfip1|1;Anxa5|1;Ywhae|1;Anxa6|1;Rac1|1;Hspa9|1;Calr|1	12	1070	129	58353	http://www.ebi.ac.uk/QuickGO/GTerm?id=GO:0005925
9	3,4,6,8,9	synaptic vesicle	GO:0008021	5.33e-06	3.63e-05	Dbi|1;Dnajc5|1;Anxa5|1;Syn1|1;Atp6v0a1|1;Sept5|1;Amph|1;Slc32a1|1	8	426	129	58353	http://www.ebi.ac.uk/QuickGO/GTerm?id=GO:0008021
5	4,5	cell-substrate adherens junction	GO:0005924	5.48e-06	3.68e-05	Ywhaq|1;Ywhaz|1;Pabpc1|1;Ywhag|1;Cltc|1;Cyfip1|1;Anxa5|1;Ywhae|1;Anxa6|1;Rac1|1;Hspa9|1;Calr|1	12	1080	129	58353	http://www.ebi.ac.uk/QuickGO/GTerm?id=GO:0005924
3	3	cell body	GO:0044297	5.9e-06	3.91e-05	Hnrnpa2b1|1;Negr1|1;Cyfip1|1;Ptges3|1;Gnao1|1;Got2|1;Atp2b1|1;Anxa5|1;Pura|1;Top1|1;Hsp90ab1|1;Ass1|1;Sh3gl2|1;Calb1|1	14	1488	129	58353	http://www.ebi.ac.uk/QuickGO/GTerm?id=GO:0044297
4	4	neuronal cell body	GO:0043025	6.06e-06	3.96e-05	Hnrnpa2b1|1;Negr1|1;Cyfip1|1;Ptges3|1;Got2|1;Atp2b1|1;Anxa5|1;Pura|1;Top1|1;Hsp90ab1|1;Ass1|1;Sh3gl2|1;Calb1|1	13	1286	129	58353	http://www.ebi.ac.uk/QuickGO/GTerm?id=GO:0043025
4	3,4	membrane protein complex	GO:0098796	6.25e-06	4.03e-05	Atp5j|1;Cltc|1;Atp5d|1;Immt|1;Atp5h|1;Ndufc2|1;Sdha|1;Gnao1|1;Gnai1|1;Uqcrb|1;Ndufa5|1;Atp5f1|1;Atp5o|1;Sptlc3|1;Atp6v0a1|1;Uqcr10|1;Ndufb4|1;Copa|1;Atp5e|1;Atp5a1|1;Hspd1|1;Calr|1	22	3429	129	58353	http://www.ebi.ac.uk/QuickGO/GTerm?id=GO:0098796
3	3	cell-substrate junction	GO:0030055	6.77e-06	4.31e-05	Ywhaq|1;Ywhaz|1;Pabpc1|1;Ywhag|1;Cltc|1;Cyfip1|1;Anxa5|1;Ywhae|1;Anxa6|1;Rac1|1;Hspa9|1;Calr|1	12	1103	129	58353	http://www.ebi.ac.uk/QuickGO/GTerm?id=GO:0030055
6	6	secretory vesicle	GO:0099503	7.91e-06	4.97e-05	Dbi|1;Dnajc5|1;Anxa5|1;Syn1|1;Atp6v0a1|1;Dld|1;Sept5|1;Hspd1|1;Amph|1;Slc32a1|1;Calr|1	11	933	129	58353	http://www.ebi.ac.uk/QuickGO/GTerm?id=GO:0099503
5	4,5	cytoplasmic vesicle part	GO:0044433	9.98e-06	6.2e-05	Ywhaq|1;Ywhaz|1;Ywhag|1;Cltc|1;Ywhae|1;Syn1|1;Atp6v0a1|1;Dld|1;Anxa6|1;Copa|1;Rac1|1;Amph|1;Slc32a1|1	13	1348	129	58353	http://www.ebi.ac.uk/QuickGO/GTerm?id=GO:0044433
3	3	whole membrane	GO:0098805	1.29e-05	7.89e-05	Cltc|1;Lrpprc|1;Dnajc5|1;Decr2|1;Sptbn1|1;Gnai1|1;Atp2b1|1;Eef2|1;Eno1|1;Syn1|1;Atp6v0a1|1;Psd3|1;Cnp|1;Anxa6|1;Copa|1;Hsp90ab1|1;Cisd1|1;Ass1|1;Atp5a1|1;Slc1a2|1;Rac1|1;Hspd1|1;Slc12a2|1;Amph|1;Epb41l3|1;Slc32a1|1	26	4733	129	58353	http://www.ebi.ac.uk/QuickGO/GTerm?id=GO:0098805
5	4,5	respiratory chain complex	GO:0098803	1.4e-05	8.49e-05	Ndufc2|1;Sdha|1;Uqcrb|1;Ndufa5|1;Uqcr10|1;Ndufb4|1	6	232	129	58353	http://www.ebi.ac.uk/QuickGO/GTerm?id=GO:0098803
7	5,6,7	mitochondrial pyruvate dehydrogenase complex	GO:0005967	1.45e-05	8.7e-05	Pdk1|1;Dlat|1	2	3	129	58353	http://www.ebi.ac.uk/QuickGO/GTerm?id=GO:0005967
4	3,4	cell projection part	GO:0044463	1.5e-05	8.82e-05	Sept11|1;Hnrnpa2b1|1;Ldha|1;Dnajc5|1;Sptbn1|1;Atp2b1|1;Syn1|1;Sept5|1;Basp1|1;Hsp90ab1|1;Slc1a2|1;Rac1|1;Epb41l3|1;Calb1|1;Slc32a1|1	15	1843	129	58353	http://www.ebi.ac.uk/QuickGO/GTerm?id=GO:0044463
6	5,6	cytoplasmic vesicle membrane	GO:0030659	1.51e-05	8.82e-05	Ywhaq|1;Ywhaz|1;Ywhag|1;Cltc|1;Ywhae|1;Syn1|1;Atp6v0a1|1;Copa|1;Amph|1;Slc32a1|1	10	817	129	58353	http://www.ebi.ac.uk/QuickGO/GTerm?id=GO:0030659
4	4	dendritic spine	GO:0043197	1.65e-05	9.56e-05	Sept11|1;Cyfip1|1;Ppp3ca|1;Atp2b1|1;Slc1a2|1;Rac1|1;Calb1|1	7	359	129	58353	http://www.ebi.ac.uk/QuickGO/GTerm?id=GO:0043197
6	4,5,6	proton-transporting ATP synthase complex, catalytic core F(1)	GO:0045261	1.81e-05	0.000103	Atp5d|1;Atp5e|1;Atp5a1|1	3	23	129	58353	http://www.ebi.ac.uk/QuickGO/GTerm?id=GO:0045261
[truncated: 410 more rows]

## Sheet: Molecular Functions
Table S3. Gene Ontology (GO) classification of acetylated proteins according to molecular functions
[truncated: 601 more rows]
