# Supplementary material for: Proteomic Profiling of Lysine Acetylation Indicates Mitochondrial Dysfunction in the Hippocampus of Gut Microbiota-Absent Mice
Source: Front Mol Neurosci. 2021 Mar 11;14:594332. doi: 10.3389/fnmol.2021.594332 (PMC7991600; doi:10.3389/fnmol.2021.594332)
Supplement: Supplementary Figure 1 — GO functional classification of the identified acetylated proteins. [file Data_Sheet_1.ZIP › Supplementary Material/Supplementary Table S4.xlsx]

## Sheet: Tablib Dataset
Table S4. KEGG pathway enrichment analysis.
Pathway Name	Pathway ID	Pvalue	Pvalue_adjusted	Genes	Count	Pop Hit	List_Total	Background Genes	URL	First class	Secondary class
Carbon metabolism	mmu01200	4.69e-17	8.17e-15	Taldo1|1;Mcee|1;Psat1|1;Idh2|1;Aco2|1;Sdha|1;Sucla2|1;Pcca|1;Glud1|1;Got2|1;Ogdhl|1;Eno1|1;Dlat|1;Dld|1;Cs|1;Acat1|1;Pdha1|1;Tpi1|1;Mdh1|1	19	120	100	8774	http://www.kegg.jp/kegg-bin/show_pathway?mmu01200/mmu:21351%09pink/mmu:73724%09pink/mmu:107272%09pink/mmu:269951%09pink/mmu:11429%09pink/mmu:66945%09pink/mmu:20916%09pink/mmu:110821%09pink/mmu:14661%09pink/mmu:14719%09pink/mmu:239017%09pink/mmu:13806%09pink/mmu:235339%09pink/mmu:13382%09pink/mmu:12974%09pink/mmu:110446%09pink/mmu:18597%09pink/mmu:21991%09pink/mmu:17449%09pink	Metabolism	Global and overview maps
Citrate cycle (TCA cycle)	mmu00020	1.23e-12	1.07e-10	Idh2|1;Aco2|1;Sdha|1;Sucla2|1;Ogdhl|1;Dlat|1;Dld|1;Cs|1;Pdha1|1;Mdh1|1	10	32	100	8774	http://www.kegg.jp/kegg-bin/show_pathway?mmu00020/mmu:269951%09pink/mmu:11429%09pink/mmu:66945%09pink/mmu:20916%09pink/mmu:239017%09pink/mmu:235339%09pink/mmu:13382%09pink/mmu:12974%09pink/mmu:18597%09pink/mmu:17449%09pink	Metabolism	Carbohydrate metabolism
Oxidative phosphorylation	mmu00190	2.48e-10	1.44e-08	Atp5j|1;Atp5d|1;Ppa2|1;Atp5h|1;Ndufc2|1;Sdha|1;Ndufa5|1;Atp5f1|1;Atp5o|1;Atp6v0a1|1;Uqcr10|1;Ndufb4|1;Atp5e|1;Atp5a1|1	14	133	100	8774	http://www.kegg.jp/kegg-bin/show_pathway?mmu00190/mmu:11957%09pink/mmu:66043%09pink/mmu:74776%09pink/mmu:71679%09pink/mmu:102641347%09pink/mmu:66945%09pink/mmu:68202%09pink/mmu:11950%09pink/mmu:102641678%09pink/mmu:11975%09pink/mmu:66152%09pink/mmu:100041273%09pink/mmu:67126%09pink/mmu:11946%09pink	Metabolism	Energy metabolism
Metabolic pathways	mmu01100	7.96e-10	3.46e-08	Taldo1|1;Atp5j|1;Mcee|1;Psat1|1;Idh2|1;Atp5d|1;Aco2|1;Ptges3|1;Aldh5a1|1;Ldha|1;Atp5h|1;Ndufc2|1;Sdha|1;Sucla2|1;Pcca|1;Ndufa5|1;Glud1|1;Atp5f1|1;Got2|1;Abat|1;Atp5o|1;Pdhx|1;Ogdhl|1;Sptlc3|1;Eno1|1;Dlat|1;Fahd1|1;Pygb|1;Atp6v0a1|1;Dld|1;Mccc1|1;Cs|1;Aldh7a1|1;Uqcr10|1;Ndufb4|1;Acat1|1;Sat2|1;Atp5e|1;Ass1|1;Atp5a1|1;Pdha1|1;Tpi1|1;Fam213b|1;Mdh1|1	44	1555	100	8774	http://www.kegg.jp/kegg-bin/show_pathway?mmu01100/mmu:21351%09pink/mmu:11957%09pink/mmu:73724%09pink/mmu:107272%09pink/mmu:269951%09pink/mmu:66043%09pink/mmu:11429%09pink/mmu:102641464%09pink/mmu:214579%09pink/mmu:16828%09pink/mmu:71679%09pink/mmu:102641347%09pink/mmu:66945%09pink/mmu:20916%09pink/mmu:110821%09pink/mmu:68202%09pink/mmu:14661%09pink/mmu:11950%09pink/mmu:14719%09pink/mmu:268860%09p…	Metabolism	Global and overview maps
Biosynthesis of amino acids	mmu01230	1.37e-08	4.75e-07	Taldo1|1;Psat1|1;Idh2|1;Aco2|1;Got2|1;Eno1|1;Cs|1;Aldh7a1|1;Ass1|1;Tpi1|1	10	77	100	8774	http://www.kegg.jp/kegg-bin/show_pathway?mmu01230/mmu:21351%09pink/mmu:107272%09pink/mmu:269951%09pink/mmu:11429%09pink/mmu:14719%09pink/mmu:13806%09pink/mmu:12974%09pink/mmu:110695%09pink/mmu:11898%09pink/mmu:21991%09pink	Metabolism	Global and overview maps
Glyoxylate and dicarboxylate metabolism	mmu00630	4.25e-08	1.23e-06	Mcee|1;Aco2|1;Pcca|1;Dld|1;Cs|1;Acat1|1;Mdh1|1	7	31	100	8774	http://www.kegg.jp/kegg-bin/show_pathway?mmu00630/mmu:73724%09pink/mmu:11429%09pink/mmu:110821%09pink/mmu:13382%09pink/mmu:12974%09pink/mmu:110446%09pink/mmu:17449%09pink	Metabolism	Carbohydrate metabolism
Propanoate metabolism	mmu00640	6.77e-08	1.68e-06	Mcee|1;Ldha|1;Sucla2|1;Pcca|1;Abat|1;Dld|1;Acat1|1	7	33	100	8774	http://www.kegg.jp/kegg-bin/show_pathway?mmu00640/mmu:73724%09pink/mmu:16828%09pink/mmu:20916%09pink/mmu:110821%09pink/mmu:268860%09pink/mmu:13382%09pink/mmu:110446%09pink	Metabolism	Carbohydrate metabolism
Pyruvate metabolism	mmu00620	1.91e-07	4.15e-06	Ldha|1;Dlat|1;Dld|1;Aldh7a1|1;Acat1|1;Pdha1|1;Mdh1|1	7	38	100	8774	http://www.kegg.jp/kegg-bin/show_pathway?mmu00620/mmu:16828%09pink/mmu:235339%09pink/mmu:13382%09pink/mmu:110695%09pink/mmu:110446%09pink/mmu:18597%09pink/mmu:17449%09pink	Metabolism	Carbohydrate metabolism
Parkinson disease	mmu05012	6.94e-07	1.34e-05	Atp5j|1;Atp5d|1;Atp5h|1;Ndufc2|1;Sdha|1;Gnai1|1;Ndufa5|1;Atp5f1|1;Atp5o|1;Uqcr10|1;Sept5|1;Ndufb4|1;Atp5e|1;Atp5a1|1	14	247	100	8774	http://www.kegg.jp/kegg-bin/show_pathway?mmu05012/mmu:11957%09pink/mmu:66043%09pink/mmu:71679%09pink/mmu:102641347%09pink/mmu:66945%09pink/mmu:14677%09pink/mmu:68202%09pink/mmu:11950%09pink/mmu:102641678%09pink/mmu:66152%09pink/mmu:18951%09pink/mmu:100041273%09pink/mmu:67126%09pink/mmu:11946%09pink	-	-
Huntington disease	mmu05016	1.5e-06	2.61e-05	Ep300|1;Atp5j|1;Tfam|1;Cltc|1;Atp5d|1;Atp5h|1;Ndufc2|1;Sdha|1;Ndufa5|1;Atp5f1|1;Atp5o|1;Uqcr10|1;Ndufb4|1;Atp5e|1;Atp5a1|1	15	303	100	8774	http://www.kegg.jp/kegg-bin/show_pathway?mmu05016/mmu:328572%09pink/mmu:11957%09pink/mmu:21780%09pink/mmu:67300%09pink/mmu:66043%09pink/mmu:71679%09pink/mmu:102641347%09pink/mmu:66945%09pink/mmu:68202%09pink/mmu:11950%09pink/mmu:102641678%09pink/mmu:66152%09pink/mmu:100041273%09pink/mmu:67126%09pink/mmu:11946%09pink	-	-
Valine, leucine and isoleucine degradation	mmu00280	2.97e-06	4.7e-05	Mcee|1;Pcca|1;Abat|1;Dld|1;Mccc1|1;Aldh7a1|1;Acat1|1	7	56	100	8774	http://www.kegg.jp/kegg-bin/show_pathway?mmu00280/mmu:73724%09pink/mmu:110821%09pink/mmu:268860%09pink/mmu:13382%09pink/mmu:72039%09pink/mmu:110695%09pink/mmu:110446%09pink	Metabolism	Amino acid metabolism
Glycolysis / Gluconeogenesis	mmu00010	9.08e-06	0.000132	Ldha|1;Eno1|1;Dlat|1;Dld|1;Aldh7a1|1;Pdha1|1;Tpi1|1	7	66	100	8774	http://www.kegg.jp/kegg-bin/show_pathway?mmu00010/mmu:16828%09pink/mmu:13806%09pink/mmu:235339%09pink/mmu:13382%09pink/mmu:110695%09pink/mmu:18597%09pink/mmu:21991%09pink	Metabolism	Carbohydrate metabolism
2-Oxocarboxylic acid metabolism	mmu01210	5.4e-05	0.000723	Idh2|1;Aco2|1;Got2|1;Cs|1	4	19	100	8774	http://www.kegg.jp/kegg-bin/show_pathway?mmu01210/mmu:269951%09pink/mmu:11429%09pink/mmu:14719%09pink/mmu:12974%09pink	Metabolism	Global and overview maps
Alanine, aspartate and glutamate metabolism	mmu00250	6.48e-05	0.000781	Aldh5a1|1;Glud1|1;Got2|1;Abat|1;Ass1|1	5	38	100	8774	http://www.kegg.jp/kegg-bin/show_pathway?mmu00250/mmu:214579%09pink/mmu:14661%09pink/mmu:14719%09pink/mmu:268860%09pink/mmu:11898%09pink	Metabolism	Amino acid metabolism
Alzheimer disease	mmu05010	6.73e-05	0.000781	Atp5j|1;Atp5d|1;Atp5h|1;Ndufc2|1;Sdha|1;Ppp3ca|1;Ndufa5|1;Atp5f1|1;Calml3|1;Atp5o|1;Uqcr10|1;Ndufb4|1;Atp5e|1;Atp5a1|1	14	368	100	8774	http://www.kegg.jp/kegg-bin/show_pathway?mmu05010/mmu:11957%09pink/mmu:66043%09pink/mmu:71679%09pink/mmu:102641347%09pink/mmu:66945%09pink/mmu:19055%09pink/mmu:68202%09pink/mmu:11950%09pink/mmu:70405%09pink/mmu:102641678%09pink/mmu:66152%09pink/mmu:100041273%09pink/mmu:67126%09pink/mmu:11946%09pink	-	-
Glucagon signaling pathway	mmu04922	0.00116	0.0125	Ep300|1;Ldha|1;Ppp3ca|1;Calml3|1;Pygb|1;Pdha1|1	6	104	100	8774	http://www.kegg.jp/kegg-bin/show_pathway?mmu04922/mmu:328572%09pink/mmu:16828%09pink/mmu:19055%09pink/mmu:70405%09pink/mmu:110078%09pink/mmu:18597%09pink	Organismal Systems	Endocrine system
Arginine biosynthesis	mmu00220	0.00122	0.0125	Glud1|1;Got2|1;Ass1|1	3	19	100	8774	http://www.kegg.jp/kegg-bin/show_pathway?mmu00220/mmu:14661%09pink/mmu:14719%09pink/mmu:11898%09pink	-	-
Oocyte meiosis	mmu04114	0.00232	0.0224	Ywhaq|1;Ywhaz|1;Ywhag|1;Ppp3ca|1;Calml3|1;Ywhae|1	6	119	100	8774	http://www.kegg.jp/kegg-bin/show_pathway?mmu04114/mmu:102634437%09pink/mmu:22631%09pink/mmu:22628%09pink/mmu:19055%09pink/mmu:70405%09pink/mmu:22627%09pink	Cellular Processes	Cell growth and death
Butanoate metabolism	mmu00650	0.00345	0.0316	Aldh5a1|1;Abat|1;Acat1|1	3	27	100	8774	http://www.kegg.jp/kegg-bin/show_pathway?mmu00650/mmu:214579%09pink/mmu:268860%09pink/mmu:110446%09pink	Metabolism	Carbohydrate metabolism
Non-alcoholic fatty liver disease (NAFLD)	mmu04932	0.00721	0.0627	Ndufc2|1;Sdha|1;Ndufa5|1;Uqcr10|1;Ndufb4|1;Rac1|1	6	150	100	8774	http://www.kegg.jp/kegg-bin/show_pathway?mmu04932/mmu:102641347%09pink/mmu:66945%09pink/mmu:68202%09pink/mmu:66152%09pink/mmu:100041273%09pink/mmu:19353%09pink	Human Diseases	Endocrine and metabolic diseases
Oxytocin signaling pathway	mmu04921	0.00792	0.0627	Rock2|1;Gnao1|1;Gnai1|1;Ppp3ca|1;Calml3|1;Eef2|1	6	153	100	8774	http://www.kegg.jp/kegg-bin/show_pathway?mmu04921/mmu:19878%09pink/mmu:14681%09pink/mmu:14677%09pink/mmu:19055%09pink/mmu:70405%09pink/mmu:13629%09pink	Organismal Systems	Endocrine system
Alcoholism	mmu05034	0.00793	0.0627	H2afz|1;H2afj|1;H3f3c|1;Gnao1|1;Gnai1|1;Calml3|1;H2afy2|1	7	201	100	8774	http://www.kegg.jp/kegg-bin/show_pathway?mmu05034/mmu:51788%09pink/mmu:232440%09pink/mmu:625328%09pink/mmu:14681%09pink/mmu:14677%09pink/mmu:70405%09pink/mmu:404634%09pink	Human Diseases	Substance dependence
HIF-1 signaling pathway	mmu04066	0.00893	0.0675	Ep300|1;Ldha|1;Pdk1|1;Eno1|1;Pdha1|1	5	112	100	8774	http://www.kegg.jp/kegg-bin/show_pathway?mmu04066/mmu:328572%09pink/mmu:16828%09pink/mmu:228026%09pink/mmu:13806%09pink/mmu:18597%09pink	Environmental Information Processing	Signal transduction
Bacterial invasion of epithelial cells	mmu05100	0.00948	0.0688	Sept11|1;Cltc|1;Sept8|1;Rac1|1	4	73	100	8774	http://www.kegg.jp/kegg-bin/show_pathway?mmu05100/mmu:52398%09pink/mmu:67300%09pink/mmu:20362%09pink/mmu:19353%09pink	Human Diseases	Infectious diseases: Bacterial
Glycine, serine and threonine metabolism	mmu00260	0.0105	0.0728	Psat1|1;Dld|1;Aldh7a1|1	3	40	100	8774	http://www.kegg.jp/kegg-bin/show_pathway?mmu00260/mmu:107272%09pink/mmu:13382%09pink/mmu:110695%09pink	Metabolism	Amino acid metabolism
Cell cycle	mmu04110	0.013	0.0873	Ywhaq|1;Ywhaz|1;Ep300|1;Ywhag|1;Ywhae|1	5	123	100	8774	http://www.kegg.jp/kegg-bin/show_pathway?mmu04110/mmu:102634437%09pink/mmu:22631%09pink/mmu:328572%09pink/mmu:22628%09pink/mmu:22627%09pink	Cellular Processes	Cell growth and death
RNA degradation	mmu03018	0.0141	0.0909	Pabpc1|1;Eno1|1;Hspd1|1;Hspa9|1	4	82	100	8774	http://www.kegg.jp/kegg-bin/show_pathway?mmu03018/mmu:18458%09pink/mmu:13806%09pink/mmu:15510%09pink/mmu:15526%09pink	Genetic Information Processing	Folding, sorting and degradation
Tuberculosis	mmu05152	0.0159	0.0987	Ep300|1;Ppp3ca|1;Calml3|1;Atp6v0a1|1;Hspd1|1;Hspa9|1	6	178	100	8774	http://www.kegg.jp/kegg-bin/show_pathway?mmu05152/mmu:328572%09pink/mmu:19055%09pink/mmu:70405%09pink/mmu:11975%09pink/mmu:15510%09pink/mmu:15526%09pink	Human Diseases	Infectious diseases: Bacterial
GABAergic synapse	mmu04727	0.0185	0.111	Gnao1|1;Gnai1|1;Abat|1;Slc32a1|1	4	89	100	8774	http://www.kegg.jp/kegg-bin/show_pathway?mmu04727/mmu:14681%09pink/mmu:14677%09pink/mmu:268860%09pink/mmu:22348%09pink	Organismal Systems	Nervous system
Tryptophan metabolism	mmu00380	0.0202	0.117	Ogdhl|1;Aldh7a1|1;Acat1|1	3	51	100	8774	http://www.kegg.jp/kegg-bin/show_pathway?mmu00380/mmu:239017%09pink/mmu:110695%09pink/mmu:110446%09pink	Metabolism	Amino acid metabolism
Cysteine and methionine metabolism	mmu00270	0.0212	0.119	Ldha|1;Got2|1;Mdh1|1	3	52	100	8774	http://www.kegg.jp/kegg-bin/show_pathway?mmu00270/mmu:16828%09pink/mmu:14719%09pink/mmu:17449%09pink	Metabolism	Amino acid metabolism
Arginine and proline metabolism	mmu00330	0.0223	0.121	Got2|1;Aldh7a1|1;Sat2|1	3	53	100	8774	http://www.kegg.jp/kegg-bin/show_pathway?mmu00330/mmu:14719%09pink/mmu:110695%09pink/mmu:69215%09pink	Metabolism	Amino acid metabolism
Proximal tubule bicarbonate reclamation	mmu04964	0.0256	0.135	Glud1|1;Mdh1|1	2	22	100	8774	http://www.kegg.jp/kegg-bin/show_pathway?mmu04964/mmu:14661%09pink/mmu:17449%09pink	Organismal Systems	Excretory system
Melanogenesis	mmu04916	0.0271	0.139	Ep300|1;Gnao1|1;Gnai1|1;Calml3|1	4	100	100	8774	http://www.kegg.jp/kegg-bin/show_pathway?mmu04916/mmu:328572%09pink/mmu:14681%09pink/mmu:14677%09pink/mmu:70405%09pink	Organismal Systems	Endocrine system
Amyotrophic lateral sclerosis (ALS)	mmu05014	0.0282	0.14	Ppp3ca|1;Slc1a2|1;Rac1|1	3	58	100	8774	http://www.kegg.jp/kegg-bin/show_pathway?mmu05014/mmu:19055%09pink/mmu:20511%09pink/mmu:19353%09pink	Human Diseases	Neurodegenerative diseases
Endocrine and other factor-regulated calcium reabsorption	mmu04961	0.0308	0.149	Cltc|1;Atp2b1|1;Calb1|1	3	60	100	8774	http://www.kegg.jp/kegg-bin/show_pathway?mmu04961/mmu:67300%09pink/mmu:67972%09pink/mmu:12307%09pink	Organismal Systems	Excretory system
Lysine degradation	mmu00310	0.0321	0.151	Ogdhl|1;Aldh7a1|1;Acat1|1	3	61	100	8774	http://www.kegg.jp/kegg-bin/show_pathway?mmu00310/mmu:239017%09pink/mmu:110695%09pink/mmu:110446%09pink	Metabolism	Amino acid metabolism
Hippo signaling pathway	mmu04390	0.0333	0.153	Ywhaq|1;Ywhaz|1;Ywhag|1;Afp|1;Ywhae|1	5	157	100	8774	http://www.kegg.jp/kegg-bin/show_pathway?mmu04390/mmu:102634437%09pink/mmu:22631%09pink/mmu:22628%09pink/mmu:11576%09pink/mmu:22627%09pink	Environmental Information Processing	Signal transduction
cAMP signaling pathway	mmu04024	0.0359	0.16	Ep300|1;Rock2|1;Gnai1|1;Calml3|1;Atp2b1|1;Rac1|1	6	215	100	8774	http://www.kegg.jp/kegg-bin/show_pathway?mmu04024/mmu:328572%09pink/mmu:19878%09pink/mmu:14677%09pink/mmu:70405%09pink/mmu:67972%09pink/mmu:19353%09pink	Environmental Information Processing	Signal transduction
Glutamatergic synapse	mmu04724	0.0399	0.169	Gnao1|1;Gnai1|1;Ppp3ca|1;Slc1a2|1	4	113	100	8774	http://www.kegg.jp/kegg-bin/show_pathway?mmu04724/mmu:14681%09pink/mmu:14677%09pink/mmu:19055%09pink/mmu:20511%09pink	Organismal Systems	Nervous system
Long-term potentiation	mmu04720	0.0407	0.169	Ep300|1;Ppp3ca|1;Calml3|1	3	67	100	8774	http://www.kegg.jp/kegg-bin/show_pathway?mmu04720/mmu:328572%09pink/mmu:19055%09pink/mmu:70405%09pink	Organismal Systems	Nervous system
Central carbon metabolism in cancer	mmu05230	0.0407	0.169	Ldha|1;Pdk1|1;Pdha1|1	3	67	100	8774	http://www.kegg.jp/kegg-bin/show_pathway?mmu05230/mmu:16828%09pink/mmu:228026%09pink/mmu:18597%09pink	Human Diseases	Cancers: Overview
D-Glutamine and D-glutamate metabolism	mmu00471	0.0448	0.181	Glud1|1	1	4	100	8774	http://www.kegg.jp/kegg-bin/show_pathway?mmu00471/mmu:14661%09pink	Metabolism	Metabolism of other amino acids
Viral carcinogenesis	mmu05203	0.0473	0.183	Ywhaq|1;Ywhaz|1;Ep300|1;Ywhag|1;Ywhae|1;Rac1|1	6	230	100	8774	http://www.kegg.jp/kegg-bin/show_pathway?mmu05203/mmu:102634437%09pink/mmu:22631%09pink/mmu:328572%09pink/mmu:22628%09pink/mmu:22627%09pink/mmu:19353%09pink	Human Diseases	Cancers: Overview
cGMP-PKG signaling pathway	mmu04022	0.0474	0.183	Rock2|1;Gnai1|1;Ppp3ca|1;Calml3|1;Atp2b1|1	5	173	100	8774	http://www.kegg.jp/kegg-bin/show_pathway?mmu04022/mmu:19878%09pink/mmu:14677%09pink/mmu:19055%09pink/mmu:70405%09pink/mmu:67972%09pink	Environmental Information Processing	Signal transduction
beta-Alanine metabolism	mmu00410	0.0511	0.193	Abat|1;Aldh7a1|1	2	32	100	8774	http://www.kegg.jp/kegg-bin/show_pathway?mmu00410/mmu:268860%09pink/mmu:110695%09pink	Metabolism	Metabolism of other amino acids
Sphingolipid signaling pathway	mmu04071	0.0529	0.196	Rock2|1;Gnai1|1;Sptlc3|1;Rac1|1	4	124	100	8774	http://www.kegg.jp/kegg-bin/show_pathway?mmu04071/mmu:19878%09pink/mmu:14677%09pink/mmu:228677%09pink/mmu:19353%09pink	Environmental Information Processing	Signal transduction
Axon guidance	mmu04360	0.0545	0.197	Rock2|1;Gnai1|1;Ppp3ca|1;Pdk1|1;Rac1|1	5	180	100	8774	http://www.kegg.jp/kegg-bin/show_pathway?mmu04360/mmu:19878%09pink/mmu:14677%09pink/mmu:19055%09pink/mmu:228026%09pink/mmu:19353%09pink	Organismal Systems	Development
Renin secretion	mmu04924	0.0556	0.197	Gnai1|1;Ppp3ca|1;Calml3|1	3	76	100	8774	http://www.kegg.jp/kegg-bin/show_pathway?mmu04924/mmu:14677%09pink/mmu:19055%09pink/mmu:70405%09pink	-	-
Synaptic vesicle cycle	mmu04721	0.0574	0.2	Cltc|1;Atp6v0a1|1;Slc32a1|1	3	77	100	8774	http://www.kegg.jp/kegg-bin/show_pathway?mmu04721/mmu:67300%09pink/mmu:11975%09pink/mmu:22348%09pink	Organismal Systems	Nervous system
Salivary secretion	mmu04970	0.0611	0.208	Calml3|1;Atp2b1|1;Slc12a2|1	3	79	100	8774	http://www.kegg.jp/kegg-bin/show_pathway?mmu04970/mmu:70405%09pink/mmu:67972%09pink/mmu:20496%09pink	Organismal Systems	Digestive system
Estrogen signaling pathway	mmu04915	0.0666	0.223	Gnao1|1;Gnai1|1;Calml3|1;Hsp90ab1|1	4	134	100	8774	http://www.kegg.jp/kegg-bin/show_pathway?mmu04915/mmu:14681%09pink/mmu:14677%09pink/mmu:70405%09pink/mmu:15516%09pink	Organismal Systems	Endocrine system
Dopaminergic synapse	mmu04728	0.068	0.223	Gnao1|1;Gnai1|1;Ppp3ca|1;Calml3|1	4	135	100	8774	http://www.kegg.jp/kegg-bin/show_pathway?mmu04728/mmu:14681%09pink/mmu:14677%09pink/mmu:19055%09pink/mmu:70405%09pink	Organismal Systems	Nervous system
Tyrosine metabolism	mmu00350	0.0759	0.244	Got2|1;Fahd1|1	2	40	100	8774	http://www.kegg.jp/kegg-bin/show_pathway?mmu00350/mmu:14719%09pink/mmu:68636%09pink	Metabolism	Amino acid metabolism
Systemic lupus erythematosus	mmu05322	0.0787	0.249	H2afz|1;H2afj|1;H3f3c|1;H2afy2|1	4	142	100	8774	http://www.kegg.jp/kegg-bin/show_pathway?mmu05322/mmu:51788%09pink/mmu:232440%09pink/mmu:625328%09pink/mmu:404634%09pink	Human Diseases	Immune diseases
Morphine addiction	mmu05032	0.0852	0.265	Gnao1|1;Gnai1|1;Slc32a1|1	3	91	100	8774	http://www.kegg.jp/kegg-bin/show_pathway?mmu05032/mmu:14681%09pink/mmu:14677%09pink/mmu:22348%09pink	Human Diseases	Substance dependence
Phenylalanine, tyrosine and tryptophan biosynthesis	mmu00400	0.0877	0.268	Got2|1	1	8	100	8774	http://www.kegg.jp/kegg-bin/show_pathway?mmu00400/mmu:14719%09pink	Metabolism	Amino acid metabolism
Vitamin B6 metabolism	mmu00750	0.0981	0.294	Psat1|1	1	9	100	8774	http://www.kegg.jp/kegg-bin/show_pathway?mmu00750/mmu:107272%09pink	Metabolism	Metabolism of cofactors and vitamins
Circadian entrainment	mmu04713	0.101	0.298	Gnao1|1;Gnai1|1;Calml3|1	3	98	100	8774	http://www.kegg.jp/kegg-bin/show_pathway?mmu04713/mmu:14681%09pink/mmu:14677%09pink/mmu:70405%09pink	Organismal Systems	Environmental adaptation
Chagas disease (American trypanosomiasis)	mmu05142	0.11	0.316	Gnao1|1;Gnai1|1;Calr|1	3	102	100	8774	http://www.kegg.jp/kegg-bin/show_pathway?mmu05142/mmu:14681%09pink/mmu:14677%09pink/mmu:12317%09pink	Human Diseases	Infectious diseases: Parasitic
Fatty acid degradation	mmu00071	0.111	0.316	Aldh7a1|1;Acat1|1	2	50	100	8774	http://www.kegg.jp/kegg-bin/show_pathway?mmu00071/mmu:110695%09pink/mmu:110446%09pink	Metabolism	Lipid metabolism
Wnt signaling pathway	mmu04310	0.113	0.317	Ep300|1;Rock2|1;Ppp3ca|1;Rac1|1	4	162	100	8774	http://www.kegg.jp/kegg-bin/show_pathway?mmu04310/mmu:328572%09pink/mmu:19878%09pink/mmu:19055%09pink/mmu:19353%09pink	Environmental Information Processing	Signal transduction
Protein processing in endoplasmic reticulum	mmu04141	0.117	0.317	Dnajc5|1;Hspa4l|1;Hsp90ab1|1;Calr|1	4	164	100	8774	http://www.kegg.jp/kegg-bin/show_pathway?mmu04141/mmu:13002%09pink/mmu:18415%09pink/mmu:15516%09pink/mmu:12317%09pink	Genetic Information Processing	Folding, sorting and degradation
Synthesis and degradation of ketone bodies	mmu00072	0.119	0.317	Acat1|1	1	11	100	8774	http://www.kegg.jp/kegg-bin/show_pathway?mmu00072/mmu:110446%09pink	Metabolism	Lipid metabolism
Epstein-Barr virus infection	mmu05169	0.119	0.317	Ywhaq|1;Ywhaz|1;Ep300|1;Ywhag|1;Ywhae|1	5	228	100	8774	http://www.kegg.jp/kegg-bin/show_pathway?mmu05169/mmu:102634437%09pink/mmu:22631%09pink/mmu:328572%09pink/mmu:22628%09pink/mmu:22627%09pink	Human Diseases	Infectious diseases: Viral
Pancreatic secretion	mmu04972	0.125	0.33	Atp2b1|1;Rac1|1;Slc12a2|1	3	108	100	8774	http://www.kegg.jp/kegg-bin/show_pathway?mmu04972/mmu:67972%09pink/mmu:19353%09pink/mmu:20496%09pink	Organismal Systems	Digestive system
VEGF signaling pathway	mmu04370	0.141	0.367	Ppp3ca|1;Rac1|1	2	58	100	8774	http://www.kegg.jp/kegg-bin/show_pathway?mmu04370/mmu:19055%09pink/mmu:19353%09pink	Environmental Information Processing	Signal transduction
Leukocyte transendothelial migration	mmu04670	0.146	0.374	Rock2|1;Gnai1|1;Rac1|1	3	116	100	8774	http://www.kegg.jp/kegg-bin/show_pathway?mmu04670/mmu:19878%09pink/mmu:14677%09pink/mmu:19353%09pink	Organismal Systems	Immune system
Long-term depression	mmu04730	0.149	0.376	Gnao1|1;Gnai1|1	2	60	100	8774	http://www.kegg.jp/kegg-bin/show_pathway?mmu04730/mmu:14681%09pink/mmu:14677%09pink	Organismal Systems	Nervous system
Neurotrophin signaling pathway	mmu04722	0.16	0.397	Calml3|1;Ywhae|1;Rac1|1	3	121	100	8774	http://www.kegg.jp/kegg-bin/show_pathway?mmu04722/mmu:70405%09pink/mmu:22627%09pink/mmu:19353%09pink	Organismal Systems	Nervous system
Nitrogen metabolism	mmu00910	0.177	0.429	Glud1|1	1	17	100	8774	http://www.kegg.jp/kegg-bin/show_pathway?mmu00910/mmu:14661%09pink	Metabolism	Energy metabolism
Glutathione metabolism	mmu00480	0.177	0.429	Idh2|1;Oplah|1	2	67	100	8774	http://www.kegg.jp/kegg-bin/show_pathway?mmu00480/mmu:269951%09pink/mmu:75475%09pink	Metabolism	Metabolism of other amino acids
Renal cell carcinoma	mmu05211	0.181	0.433	Ep300|1;Rac1|1	2	68	100	8774	http://www.kegg.jp/kegg-bin/show_pathway?mmu05211/mmu:328572%09pink/mmu:19353%09pink	Human Diseases	Cancers: Specific types
Amphetamine addiction	mmu05031	0.186	0.436	Ppp3ca|1;Calml3|1	2	69	100	8774	http://www.kegg.jp/kegg-bin/show_pathway?mmu05031/mmu:19055%09pink/mmu:70405%09pink	Human Diseases	Substance dependence
Adherens junction	mmu04520	0.194	0.448	Ep300|1;Rac1|1	2	71	100	8774	http://www.kegg.jp/kegg-bin/show_pathway?mmu04520/mmu:328572%09pink/mmu:19353%09pink	Cellular Processes	Cellular community
One carbon pool by folate	mmu00670	0.196	0.448	Aldh1l1|1	1	19	100	8774	http://www.kegg.jp/kegg-bin/show_pathway?mmu00670/mmu:107747%09pink	Metabolism	Metabolism of cofactors and vitamins
Gastric acid secretion	mmu04971	0.21	0.476	Gnai1|1;Calml3|1	2	75	100	8774	http://www.kegg.jp/kegg-bin/show_pathway?mmu04971/mmu:14677%09pink/mmu:70405%09pink	Organismal Systems	Digestive system
Pertussis	mmu05133	0.215	0.479	Gnai1|1;Calml3|1	2	76	100	8774	http://www.kegg.jp/kegg-bin/show_pathway?mmu05133/mmu:14677%09pink/mmu:70405%09pink	Human Diseases	Infectious diseases: Bacterial
PI3K-Akt signaling pathway	mmu04151	0.218	0.48	Ywhaq|1;Ywhaz|1;Ywhag|1;Ywhae|1;Hsp90ab1|1;Rac1|1	6	355	100	8774	http://www.kegg.jp/kegg-bin/show_pathway?mmu04151/mmu:102634437%09pink/mmu:22631%09pink/mmu:22628%09pink/mmu:22627%09pink/mmu:15516%09pink/mmu:19353%09pink	Environmental Information Processing	Signal transduction
Rap1 signaling pathway	mmu04015	0.227	0.492	Gnao1|1;Gnai1|1;Calml3|1;Rac1|1	4	214	100	8774	http://www.kegg.jp/kegg-bin/show_pathway?mmu04015/mmu:14681%09pink/mmu:14677%09pink/mmu:70405%09pink/mmu:19353%09pink	Environmental Information Processing	Signal transduction
Phenylalanine metabolism	mmu00360	0.232	0.492	Got2|1	1	23	100	8774	http://www.kegg.jp/kegg-bin/show_pathway?mmu00360/mmu:14719%09pink	Metabolism	Amino acid metabolism
Terpenoid backbone biosynthesis	mmu00900	0.232	0.492	Acat1|1	1	23	100	8774	http://www.kegg.jp/kegg-bin/show_pathway?mmu00900/mmu:110446%09pink	Metabolism	Metabolism of terpenoids and polyketides
B cell receptor signaling pathway	mmu04662	0.236	0.493	Ppp3ca|1;Rac1|1	2	81	100	8774	http://www.kegg.jp/kegg-bin/show_pathway?mmu04662/mmu:19055%09pink/mmu:19353%09pink	Organismal Systems	Immune system
Retrograde endocannabinoid signaling	mmu04723	0.238	0.493	Gnao1|1;Gnai1|1;Slc32a1|1	3	148	100	8774	http://www.kegg.jp/kegg-bin/show_pathway?mmu04723/mmu:14681%09pink/mmu:14677%09pink/mmu:22348%09pink	Organismal Systems	Nervous system
Peroxisome	mmu04146	0.248	0.506	Idh2|1;Decr2|1	2	84	100	8774	http://www.kegg.jp/kegg-bin/show_pathway?mmu04146/mmu:269951%09pink/mmu:26378%09pink	Cellular Processes	Transport and catabolism
Adrenergic signaling in cardiomyocytes	mmu04261	0.25	0.506	Gnai1|1;Calml3|1;Atp2b1|1	3	152	100	8774	http://www.kegg.jp/kegg-bin/show_pathway?mmu04261/mmu:14677%09pink/mmu:70405%09pink/mmu:67972%09pink	Organismal Systems	Circulatory system
Collecting duct acid secretion	mmu04966	0.267	0.51	Atp6v0a1|1	1	27	100	8774	http://www.kegg.jp/kegg-bin/show_pathway?mmu04966/mmu:11975%09pink	Organismal Systems	Excretory system
Phototransduction	mmu04744	0.267	0.51	Calml3|1	1	27	100	8774	http://www.kegg.jp/kegg-bin/show_pathway?mmu04744/mmu:70405%09pink	Organismal Systems	Sensory system
Ascorbate and aldarate metabolism	mmu00053	0.267	0.51	Aldh7a1|1	1	27	100	8774	http://www.kegg.jp/kegg-bin/show_pathway?mmu00053/mmu:110695%09pink	Metabolism	Carbohydrate metabolism
Histidine metabolism	mmu00340	0.267	0.51	Aldh7a1|1	1	27	100	8774	http://www.kegg.jp/kegg-bin/show_pathway?mmu00340/mmu:110695%09pink	Metabolism	Amino acid metabolism
Arachidonic acid metabolism	mmu00590	0.27	0.51	Ptges3|1;Fam213b|1	2	89	100	8774	http://www.kegg.jp/kegg-bin/show_pathway?mmu00590/mmu:102641464%09pink/mmu:66469%09pink	Metabolism	Lipid metabolism
Fc gamma R-mediated phagocytosis	mmu04666	0.27	0.51	Rac1|1;Amph|1	2	89	100	8774	http://www.kegg.jp/kegg-bin/show_pathway?mmu04666/mmu:19353%09pink/mmu:218038%09pink	Organismal Systems	Immune system
Progesterone-mediated oocyte maturation	mmu04914	0.274	0.512	Gnai1|1;Hsp90ab1|1	2	90	100	8774	http://www.kegg.jp/kegg-bin/show_pathway?mmu04914/mmu:14677%09pink/mmu:15516%09pink	Organismal Systems	Endocrine system
Antigen processing and presentation	mmu04612	0.278	0.515	Hsp90ab1|1;Calr|1	2	91	100	8774	http://www.kegg.jp/kegg-bin/show_pathway?mmu04612/mmu:15516%09pink/mmu:12317%09pink	Organismal Systems	Immune system
Hepatitis B	mmu05161	0.281	0.515	Ywhaq|1;Ywhaz|1;Ep300|1	3	162	100	8774	http://www.kegg.jp/kegg-bin/show_pathway?mmu05161/mmu:102634437%09pink/mmu:22631%09pink/mmu:328572%09pink	Human Diseases	Infectious diseases: Viral
Tight junction	mmu04530	0.294	0.532	Sptbn1|1;Gnai1|1;Epb41l3|1	3	166	100	8774	http://www.kegg.jp/kegg-bin/show_pathway?mmu04530/mmu:20742%09pink/mmu:14677%09pink/mmu:13823%09pink	Cellular Processes	Cellular community
Pentose phosphate pathway	mmu00030	0.308	0.541	Taldo1|1	1	32	100	8774	http://www.kegg.jp/kegg-bin/show_pathway?mmu00030/mmu:21351%09pink	Metabolism	Carbohydrate metabolism
Glycerophospholipid metabolism	mmu00564	0.308	0.541	Lypla1|1;Gpd2|1	2	98	100	8774	http://www.kegg.jp/kegg-bin/show_pathway?mmu00564/mmu:18777%09pink/mmu:14571%09pink	Metabolism	Lipid metabolism
Choline metabolism in cancer	mmu05231	0.308	0.541	Lypla1|1;Rac1|1	2	98	100	8774	http://www.kegg.jp/kegg-bin/show_pathway?mmu05231/mmu:18777%09pink/mmu:19353%09pink	Human Diseases	Cancers: Overview
Prostate cancer	mmu05215	0.312	0.543	Ep300|1;Hsp90ab1|1	2	99	100	8774	http://www.kegg.jp/kegg-bin/show_pathway?mmu05215/mmu:328572%09pink/mmu:15516%09pink	Human Diseases	Cancers: Specific types
Starch and sucrose metabolism	mmu00500	0.315	0.543	Pygb|1	1	33	100	8774	http://www.kegg.jp/kegg-bin/show_pathway?mmu00500/mmu:110078%09pink	Metabolism	Carbohydrate metabolism
Fructose and mannose metabolism	mmu00051	0.331	0.565	Tpi1|1	1	35	100	8774	http://www.kegg.jp/kegg-bin/show_pathway?mmu00051/mmu:21991%09pink	Metabolism	Carbohydrate metabolism
Phagosome	mmu04145	0.337	0.57	Atp6v0a1|1;Rac1|1;Calr|1	3	180	100	8774	http://www.kegg.jp/kegg-bin/show_pathway?mmu04145/mmu:11975%09pink/mmu:19353%09pink/mmu:12317%09pink	Cellular Processes	Transport and catabolism
Toxoplasmosis	mmu05145	0.349	0.585	Gnao1|1;Gnai1|1	2	108	100	8774	http://www.kegg.jp/kegg-bin/show_pathway?mmu05145/mmu:14681%09pink/mmu:14677%09pink	Human Diseases	Infectious diseases: Parasitic
African trypanosomiasis	mmu05143	0.354	0.586	Hbb-b1|1	1	38	100	8774	http://www.kegg.jp/kegg-bin/show_pathway?mmu05143/mmu:100503605%09pink	Human Diseases	Infectious diseases: Parasitic
Cholinergic synapse	mmu04725	0.366	0.597	Gnao1|1;Gnai1|1	2	112	100	8774	http://www.kegg.jp/kegg-bin/show_pathway?mmu04725/mmu:14681%09pink/mmu:14677%09pink	Organismal Systems	Nervous system
Nicotine addiction	mmu05033	0.368	0.597	Slc32a1|1	1	40	100	8774	http://www.kegg.jp/kegg-bin/show_pathway?mmu05033/mmu:22348%09pink	Human Diseases	Substance dependence
Endocytosis	mmu04144	0.37	0.597	Cltc|1;Psd3|1;Sh3gl2|1;Amph|1	4	270	100	8774	http://www.kegg.jp/kegg-bin/show_pathway?mmu04144/mmu:67300%09pink/mmu:234353%09pink/mmu:20404%09pink/mmu:218038%09pink	Cellular Processes	Transport and catabolism
Calcium signaling pathway	mmu04020	0.375	0.599	Ppp3ca|1;Calml3|1;Atp2b1|1	3	192	100	8774	http://www.kegg.jp/kegg-bin/show_pathway?mmu04020/mmu:19055%09pink/mmu:70405%09pink/mmu:67972%09pink	Environmental Information Processing	Signal transduction
Fat digestion and absorption	mmu04975	0.383	0.602	Got2|1	1	42	100	8774	http://www.kegg.jp/kegg-bin/show_pathway?mmu04975/mmu:14719%09pink	Organismal Systems	Digestive system
Natural killer cell mediated cytotoxicity	mmu04650	0.386	0.602	Ppp3ca|1;Rac1|1	2	117	100	8774	http://www.kegg.jp/kegg-bin/show_pathway?mmu04650/mmu:19055%09pink/mmu:19353%09pink	Organismal Systems	Immune system
Chemokine signaling pathway	mmu04062	0.387	0.602	Rock2|1;Gnai1|1;Rac1|1	3	196	100	8774	http://www.kegg.jp/kegg-bin/show_pathway?mmu04062/mmu:19878%09pink/mmu:14677%09pink/mmu:19353%09pink	Organismal Systems	Immune system
Basal transcription factors	mmu03022	0.397	0.611	Taf6|1	1	44	100	8774	http://www.kegg.jp/kegg-bin/show_pathway?mmu03022/mmu:21343%09pink	Genetic Information Processing	Transcription
Platelet activation	mmu04611	0.415	0.633	Rock2|1;Gnai1|1	2	124	100	8774	http://www.kegg.jp/kegg-bin/show_pathway?mmu04611/mmu:19878%09pink/mmu:14677%09pink	Organismal Systems	Immune system
Cocaine addiction	mmu05030	0.424	0.635	Gnai1|1	1	48	100	8774	http://www.kegg.jp/kegg-bin/show_pathway?mmu05030/mmu:14677%09pink	Human Diseases	Substance dependence
Sphingolipid metabolism	mmu00600	0.424	0.635	Sptlc3|1	1	48	100	8774	http://www.kegg.jp/kegg-bin/show_pathway?mmu00600/mmu:228677%09pink	Metabolism	Lipid metabolism
Osteoclast differentiation	mmu04380	0.43	0.635	Ppp3ca|1;Rac1|1	2	128	100	8774	http://www.kegg.jp/kegg-bin/show_pathway?mmu04380/mmu:19055%09pink/mmu:19353%09pink	Organismal Systems	Development
Amino sugar and nucleotide sugar metabolism	mmu00520	0.431	0.635	Cyb5r1|1	1	49	100	8774	http://www.kegg.jp/kegg-bin/show_pathway?mmu00520/mmu:72017%09pink	Metabolism	Carbohydrate metabolism
Serotonergic synapse	mmu04726	0.442	0.641	Gnao1|1;Gnai1|1	2	131	100	8774	http://www.kegg.jp/kegg-bin/show_pathway?mmu04726/mmu:14681%09pink/mmu:14677%09pink	Organismal Systems	Nervous system
Lysosome	mmu04142	0.442	0.641	Cltc|1;Atp6v0a1|1	2	131	100	8774	http://www.kegg.jp/kegg-bin/show_pathway?mmu04142/mmu:67300%09pink/mmu:11975%09pink	Cellular Processes	Transport and catabolism
Regulation of actin cytoskeleton	mmu04810	0.448	0.642	Cyfip1|1;Rock2|1;Rac1|1	3	216	100	8774	http://www.kegg.jp/kegg-bin/show_pathway?mmu04810/mmu:20430%09pink/mmu:19878%09pink/mmu:19353%09pink	Cellular Processes	Cell motility
Mineral absorption	mmu04978	0.45	0.642	Atp2b1|1	1	52	100	8774	http://www.kegg.jp/kegg-bin/show_pathway?mmu04978/mmu:67972%09pink	Organismal Systems	Digestive system
Notch signaling pathway	mmu04330	0.463	0.654	Ep300|1	1	54	100	8774	http://www.kegg.jp/kegg-bin/show_pathway?mmu04330/mmu:328572%09pink	Environmental Information Processing	Signal transduction
Malaria	mmu05144	0.475	0.658	Hbb-b1|1	1	56	100	8774	http://www.kegg.jp/kegg-bin/show_pathway?mmu05144/mmu:100503605%09pink	Human Diseases	Infectious diseases: Parasitic
Regulation of lipolysis in adipocytes	mmu04923	0.475	0.658	Gnai1|1	1	56	100	8774	http://www.kegg.jp/kegg-bin/show_pathway?mmu04923/mmu:14677%09pink	-	-
Vascular smooth muscle contraction	mmu04270	0.476	0.658	Rock2|1;Calml3|1	2	140	100	8774	http://www.kegg.jp/kegg-bin/show_pathway?mmu04270/mmu:19878%09pink/mmu:70405%09pink	Organismal Systems	Circulatory system
Insulin signaling pathway	mmu04910	0.48	0.658	Calml3|1;Pygb|1	2	141	100	8774	http://www.kegg.jp/kegg-bin/show_pathway?mmu04910/mmu:70405%09pink/mmu:110078%09pink	Organismal Systems	Endocrine system
Legionellosis	mmu05134	0.504	0.675	Hspd1|1	1	61	100	8774	http://www.kegg.jp/kegg-bin/show_pathway?mmu05134/mmu:15510%09pink	Human Diseases	Infectious diseases: Bacterial
Fatty acid metabolism	mmu01212	0.504	0.675	Acat1|1	1	61	100	8774	http://www.kegg.jp/kegg-bin/show_pathway?mmu01212/mmu:110446%09pink	Metabolism	Global and overview maps
Glycerolipid metabolism	mmu00561	0.504	0.675	Aldh7a1|1	1	61	100	8774	http://www.kegg.jp/kegg-bin/show_pathway?mmu00561/mmu:110695%09pink	Metabolism	Lipid metabolism
Spliceosome	mmu03040	0.513	0.681	Hnrnpa1|1;Hnrnpm|1	2	150	100	8774	http://www.kegg.jp/kegg-bin/show_pathway?mmu03040/mmu:15382%09pink/mmu:76936%09pink	Genetic Information Processing	Transcription
Fc epsilon RI signaling pathway	mmu04664	0.532	0.7	Rac1|1	1	66	100	8774	http://www.kegg.jp/kegg-bin/show_pathway?mmu04664/mmu:19353%09pink	Organismal Systems	Immune system
Human T-cell leukemia virus 1 infection	mmu05166	0.535	0.7	Ep300|1;Ppp3ca|1;Calr|1	3	246	100	8774	http://www.kegg.jp/kegg-bin/show_pathway?mmu05166/mmu:328572%09pink/mmu:19055%09pink/mmu:12317%09pink	-	-
Type I diabetes mellitus	mmu04940	0.553	0.718	Hspd1|1	1	70	100	8774	http://www.kegg.jp/kegg-bin/show_pathway?mmu04940/mmu:15510%09pink	Human Diseases	Endocrine and metabolic diseases
Inositol phosphate metabolism	mmu00562	0.568	0.733	Tpi1|1	1	73	100	8774	http://www.kegg.jp/kegg-bin/show_pathway?mmu00562/mmu:21991%09pink	Metabolism	Carbohydrate metabolism
Glioma	mmu05214	0.573	0.734	Calml3|1	1	74	100	8774	http://www.kegg.jp/kegg-bin/show_pathway?mmu05214/mmu:70405%09pink	Human Diseases	Cancers: Specific types
Pancreatic cancer	mmu05212	0.583	0.741	Rac1|1	1	76	100	8774	http://www.kegg.jp/kegg-bin/show_pathway?mmu05212/mmu:19353%09pink	Human Diseases	Cancers: Specific types
Gap junction	mmu04540	0.629	0.775	Gnai1|1	1	86	100	8774	http://www.kegg.jp/kegg-bin/show_pathway?mmu04540/mmu:14677%09pink	Cellular Processes	Cellular community
Rheumatoid arthritis	mmu05323	0.629	0.775	Atp6v0a1|1	1	86	100	8774	http://www.kegg.jp/kegg-bin/show_pathway?mmu05323/mmu:11975%09pink	Human Diseases	Immune diseases
Cardiac muscle contraction	mmu04260	0.633	0.775	Uqcr10|1	1	87	100	8774	http://www.kegg.jp/kegg-bin/show_pathway?mmu04260/mmu:66152%09pink	Organismal Systems	Circulatory system
Colorectal cancer	mmu05210	0.637	0.775	Rac1|1	1	88	100	8774	http://www.kegg.jp/kegg-bin/show_pathway?mmu05210/mmu:19353%09pink	Human Diseases	Cancers: Specific types
PPAR signaling pathway	mmu03320	0.637	0.775	Dbi|1	1	88	100	8774	http://www.kegg.jp/kegg-bin/show_pathway?mmu03320/mmu:13167%09pink	Organismal Systems	Endocrine system
Viral myocarditis	mmu05416	0.637	0.775	Rac1|1	1	88	100	8774	http://www.kegg.jp/kegg-bin/show_pathway?mmu05416/mmu:19353%09pink	Human Diseases	Cardiovascular diseases
RNA transport	mmu03013	0.645	0.775	Pabpc1|1;Cyfip1|1	2	191	100	8774	http://www.kegg.jp/kegg-bin/show_pathway?mmu03013/mmu:18458%09pink/mmu:20430%09pink	Genetic Information Processing	Translation
GnRH signaling pathway	mmu04912	0.645	0.775	Calml3|1	1	90	100	8774	http://www.kegg.jp/kegg-bin/show_pathway?mmu04912/mmu:70405%09pink	Organismal Systems	Endocrine system
mRNA surveillance pathway	mmu03015	0.665	0.782	Pabpc1|1	1	95	100	8774	http://www.kegg.jp/kegg-bin/show_pathway?mmu03015/mmu:18458%09pink	Genetic Information Processing	Translation
TGF-beta signaling pathway	mmu04350	0.665	0.782	Ep300|1	1	95	100	8774	http://www.kegg.jp/kegg-bin/show_pathway?mmu04350/mmu:328572%09pink	Environmental Information Processing	Signal transduction
Focal adhesion	mmu04510	0.672	0.782	Rock2|1;Rac1|1	2	201	100	8774	http://www.kegg.jp/kegg-bin/show_pathway?mmu04510/mmu:19878%09pink/mmu:19353%09pink	Cellular Processes	Cellular community
Phosphatidylinositol signaling system	mmu04070	0.677	0.782	Calml3|1	1	98	100	8774	http://www.kegg.jp/kegg-bin/show_pathway?mmu04070/mmu:70405%09pink	Environmental Information Processing	Signal transduction
Toll-like receptor signaling pathway	mmu04620	0.681	0.782	Rac1|1	1	99	100	8774	http://www.kegg.jp/kegg-bin/show_pathway?mmu04620/mmu:19353%09pink	Organismal Systems	Immune system
Proteoglycans in cancer	mmu05205	0.683	0.782	Rock2|1;Rac1|1	2	205	100	8774	http://www.kegg.jp/kegg-bin/show_pathway?mmu05205/mmu:19878%09pink/mmu:19353%09pink	Human Diseases	Cancers: Overview
Aldosterone synthesis and secretion	mmu04925	0.684	0.782	Calml3|1	1	100	100	8774	http://www.kegg.jp/kegg-bin/show_pathway?mmu04925/mmu:70405%09pink	-	-
AGE-RAGE signaling pathway in diabetic complications	mmu04933	0.688	0.782	Rac1|1	1	101	100	8774	http://www.kegg.jp/kegg-bin/show_pathway?mmu04933/mmu:19353%09pink	-	-
T cell receptor signaling pathway	mmu04660	0.695	0.785	Ppp3ca|1	1	103	100	8774	http://www.kegg.jp/kegg-bin/show_pathway?mmu04660/mmu:19055%09pink	Organismal Systems	Immune system
Insulin resistance	mmu04931	0.719	0.803	Pygb|1	1	110	100	8774	http://www.kegg.jp/kegg-bin/show_pathway?mmu04931/mmu:110078%09pink	-	-
Salmonella infection	mmu05132	0.72	0.803	Rock2|1;Rac1|1	2	220	100	8774	http://www.kegg.jp/kegg-bin/show_pathway?mmu05132/mmu:19878%09pink/mmu:19353%09pink	Human Diseases	Infectious diseases: Bacterial
Pathways in cancer	mmu05200	0.744	0.82	Ep300|1;Rock2|1;Gnai1|1;Hsp90ab1|1;Rac1|1	5	539	100	8774	http://www.kegg.jp/kegg-bin/show_pathway?mmu05200/mmu:328572%09pink/mmu:19878%09pink/mmu:14677%09pink/mmu:15516%09pink/mmu:19353%09pink	Human Diseases	Cancers: Overview
Ras signaling pathway	mmu04014	0.747	0.82	Calml3|1;Rac1|1	2	232	100	8774	http://www.kegg.jp/kegg-bin/show_pathway?mmu04014/mmu:70405%09pink/mmu:19353%09pink	Environmental Information Processing	Signal transduction
Thyroid hormone signaling pathway	mmu04919	0.75	0.82	Ep300|1	1	120	100	8774	http://www.kegg.jp/kegg-bin/show_pathway?mmu04919/mmu:328572%09pink	Organismal Systems	Endocrine system
AMPK signaling pathway	mmu04152	0.767	0.831	Eef2|1	1	126	100	8774	http://www.kegg.jp/kegg-bin/show_pathway?mmu04152/mmu:13629%09pink	Environmental Information Processing	Signal transduction
Inflammatory mediator regulation of TRP channels	mmu04750	0.769	0.831	Calml3|1	1	127	100	8774	http://www.kegg.jp/kegg-bin/show_pathway?mmu04750/mmu:70405%09pink	Organismal Systems	Sensory system
FoxO signaling pathway	mmu04068	0.78	0.837	Ep300|1	1	131	100	8774	http://www.kegg.jp/kegg-bin/show_pathway?mmu04068/mmu:328572%09pink	Environmental Information Processing	Signal transduction
Apoptosis	mmu04210	0.792	0.846	Spta1|1	1	136	100	8774	http://www.kegg.jp/kegg-bin/show_pathway?mmu04210/mmu:20739%09pink	Cellular Processes	Cell growth and death
Ubiquitin mediated proteolysis	mmu04120	0.808	0.858	Ube2o|1	1	143	100	8774	http://www.kegg.jp/kegg-bin/show_pathway?mmu04120/mmu:217342%09pink	Genetic Information Processing	Folding, sorting and degradation
JAK-STAT signaling pathway	mmu04630	0.852	0.889	Ep300|1	1	165	100	8774	http://www.kegg.jp/kegg-bin/show_pathway?mmu04630/mmu:328572%09pink	-	-
Influenza A	mmu05164	0.854	0.889	Ep300|1	1	166	100	8774	http://www.kegg.jp/kegg-bin/show_pathway?mmu05164/mmu:328572%09pink	Human Diseases	Infectious diseases: Viral
MAPK signaling pathway	mmu04010	0.854	0.889	Ppp3ca|1;Rac1|1	2	294	100	8774	http://www.kegg.jp/kegg-bin/show_pathway?mmu04010/mmu:19055%09pink/mmu:19353%09pink	Environmental Information Processing	Signal transduction
Cell adhesion molecules (CAMs)	mmu04514	0.863	0.894	Negr1|1	1	172	100	8774	http://www.kegg.jp/kegg-bin/show_pathway?mmu04514/mmu:320840%09pink	Environmental Information Processing	Signaling molecules and interaction
Transcriptional misregulation in cancer	mmu05202	0.881	0.907	H3f3c|1	1	184	100	8774	http://www.kegg.jp/kegg-bin/show_pathway?mmu05202/mmu:625328%09pink	Human Diseases	Cancers: Overview
NOD-like receptor signaling pathway	mmu04621	0.916	0.937	Hsp90ab1|1	1	213	100	8774	http://www.kegg.jp/kegg-bin/show_pathway?mmu04621/mmu:15516%09pink	Organismal Systems	Immune system
Herpes simplex virus 1 infection	mmu05168	0.963	0.98	Ep300|1;Taf6|1	2	437	100	8774	http://www.kegg.jp/kegg-bin/show_pathway?mmu05168/mmu:328572%09pink/mmu:21343%09pink	-	-
MicroRNAs in cancer	mmu05206	0.971	0.982	Ep300|1	1	303	100	8774	http://www.kegg.jp/kegg-bin/show_pathway?mmu05206/mmu:328572%09pink	Human Diseases	Cancers: Overview
Olfactory transduction	mmu04740	1.00e+00	1.00e+00	Calml3|1	1	1133	100	8774	http://www.kegg.jp/kegg-bin/show_pathway?mmu04740/mmu:70405%09pink	Organismal Systems	Sensory system
Lysine biosynthesis	mmu00300	1.00e+00	1.00e+00	Aldh7a1|1	1	0	100	8774	http://www.kegg.jp/kegg-bin/show_pathway?mmu00300/mmu:110695%09pink	Metabolism	Amino acid metabolism
