# Supplementary material for: Proteomic Profiling of Lysine Acetylation Indicates Mitochondrial Dysfunction in the Hippocampus of Gut Microbiota-Absent Mice
Source: Front Mol Neurosci. 2021 Mar 11;14:594332. doi: 10.3389/fnmol.2021.594332 (PMC7991600; doi:10.3389/fnmol.2021.594332)
Supplement: Supplementary Figure 1 — GO functional classification of the identified acetylated proteins. [file Data_Sheet_1.ZIP › Supplementary Material/Supplementary Table S5.xlsx]

## Sheet: Supplementary Table S5
Table S5. protein domain enrichment analysis.
#term ID	term description	observed gene count	background gene count	false discovery rate	matching proteins in your network (IDs)	matching proteins in your network (labels)
PF00244	14-3-3 protein	4	7	7.36e-05	ENSMUSP00000022894,ENSMUSP00000051223,ENSMUSP00000070993,ENSMUSP00000100067	Ywhae,Ywhag,Ywhaq,Ywhaz
PF00364	Biotin-requiring enzyme	4	9	7.9e-05	ENSMUSP00000011058,ENSMUSP00000029259,ENSMUSP00000034567,ENSMUSP00000038763	Dlat,Mccc1,Pcca,Pdhx
PF00890	FAD binding domain	4	19	0.00062	ENSMUSP00000022062,ENSMUSP00000029386,ENSMUSP00000106481,ENSMUSP00000108237	Dld,Etfdh,Gpd2,Sdha
PF00735	Septin	3	13	0.0053	ENSMUSP00000074293,ENSMUSP00000110927,ENSMUSP00000112920	Sept11,Sept7,Sept8
PF00171	Aldehyde dehydrogenase family	3	21	0.0082	ENSMUSP00000040591,ENSMUSP00000114304,ENSMUSP00000133372	Aldh1l1,Aldh5a1,Aldh7a1
PF00198	2-oxoacid dehydrogenases acyltransferase (catalytic domain)	2	4	0.0082	ENSMUSP00000011058,ENSMUSP00000034567	Dlat,Pdhx
PF02135	TAZ zinc finger	2	2	0.0082	ENSMUSP00000023165,ENSMUSP00000066789	Crebbp,Ep300
PF02172	KIX domain	2	2	0.0082	ENSMUSP00000023165,ENSMUSP00000066789	Crebbp,Ep300
PF02817	e3 binding domain	2	3	0.0082	ENSMUSP00000011058,ENSMUSP00000034567	Dlat,Pdhx
PF06001	Domain of Unknown Function (DUF902)	2	2	0.0082	ENSMUSP00000023165,ENSMUSP00000066789	Crebbp,Ep300
PF08214	Histone acetylation protein	2	2	0.0082	ENSMUSP00000023165,ENSMUSP00000066789	Crebbp,Ep300
PF08443	RimK-like ATP-grasp domain	2	4	0.0082	ENSMUSP00000029259,ENSMUSP00000038763	Mccc1,Pcca
PF09030	Creb binding	2	2	0.0082	ENSMUSP00000023165,ENSMUSP00000066789	Crebbp,Ep300
PF13499	EF-hand domain pair	5	93	0.0082	ENSMUSP00000029876,ENSMUSP00000072145,ENSMUSP00000097797,ENSMUSP00000105709,ENSMUSP00000108237	Calb1,Calm1,Gpd2,Sptan1,Vsnl1
PF16211	C-terminus of histone H2A	3	25	0.0082	ENSMUSP00000020283,ENSMUSP00000036907,ENSMUSP00000074142	H2afj,H2afy2,H2afz
PF00036	EF hand	4	64	0.0087	ENSMUSP00000029876,ENSMUSP00000072145,ENSMUSP00000097797,ENSMUSP00000105709	Calb1,Calm1,Sptan1,Vsnl1
PF00289	Biotin carboxylase, N-terminal domain	2	5	0.0087	ENSMUSP00000029259,ENSMUSP00000038763	Mccc1,Pcca
PF02785	Biotin carboxylase C-terminal domain	2	5	0.0087	ENSMUSP00000029259,ENSMUSP00000038763	Mccc1,Pcca
PF02222	ATP-grasp domain	2	6	0.0099	ENSMUSP00000029259,ENSMUSP00000038763	Mccc1,Pcca
PF07478	D-ala D-ala ligase C-terminus	2	6	0.0099	ENSMUSP00000029259,ENSMUSP00000038763	Mccc1,Pcca
PF02866	lactate/malate dehydrogenase, alpha/beta C-terminal domain	2	7	0.0114	ENSMUSP00000099938,ENSMUSP00000103267	Ldha,Mdh1
PF00056	lactate/malate dehydrogenase, NAD binding domain	2	8	0.0136	ENSMUSP00000099938,ENSMUSP00000103267	Ldha,Mdh1
PF00125	Core histone H2A/H2B/H3/H4	4	80	0.0136	ENSMUSP00000020283,ENSMUSP00000036907,ENSMUSP00000074142,ENSMUSP00000124509	H2afj,H2afy2,H2afz,H3f3a
PF01661	Macro domain	2	8	0.0136	ENSMUSP00000020283,ENSMUSP00000039507	H2afy2,Macrod1
PF02786	Carbamoyl-phosphate synthase L chain, ATP binding domain	2	8	0.0136	ENSMUSP00000029259,ENSMUSP00000038763	Mccc1,Pcca
PF00676	Dehydrogenase E1 component	2	9	0.014	ENSMUSP00000003461,ENSMUSP00000033662	Ogdh,Pdha1
PF08726	Ca2+ insensitive EF hand	2	10	0.0161	ENSMUSP00000097797,ENSMUSP00000105709	Calm1,Sptan1
PF13202	EF hand	4	93	0.018	ENSMUSP00000029876,ENSMUSP00000072145,ENSMUSP00000097797,ENSMUSP00000105709	Calb1,Calm1,Sptan1,Vsnl1
PF13833	EF-hand domain pair	4	92	0.018	ENSMUSP00000029876,ENSMUSP00000072145,ENSMUSP00000097797,ENSMUSP00000105709	Calb1,Calm1,Sptan1,Vsnl1
PF00191	Annexin	2	12	0.0198	ENSMUSP00000029266,ENSMUSP00000104511	Anxa5,Anxa6
PF00012	Hsp70 protein	2	13	0.0221	ENSMUSP00000020630,ENSMUSP00000025217	Hspa4,Hspa9
PF00042	Globin	2	13	0.0221	ENSMUSP00000023934,ENSMUSP00000090897	Hba-a1,Hbb-bs
PF06723	MreB/Mbl protein	2	13	0.0221	ENSMUSP00000020630,ENSMUSP00000025217	Hspa4,Hspa9
PF00503	G-protein alpha subunit	2	16	0.029	ENSMUSP00000074259,ENSMUSP00000114144	Gnai1,Gnao1
PF00569	Zinc finger, ZZ type	2	16	0.029	ENSMUSP00000023165,ENSMUSP00000066789	Crebbp,Ep300
PF00578	AhpC/TSA family	2	17	0.0305	ENSMUSP00000022317,ENSMUSP00000025961	Fam213a,Prdx3
PF02518	Histidine kinase-, DNA gyrase B-, and HSP90-like ATPase	2	17	0.0305	ENSMUSP00000024739,ENSMUSP00000036604	Hsp90ab1,Pdk3
PF03114	BAR domain	2	18	0.032	ENSMUSP00000003345,ENSMUSP00000030212	Amph,Sh3gl2
PF13405	EF-hand domain	3	62	0.0342	ENSMUSP00000029876,ENSMUSP00000072145,ENSMUSP00000105709	Calb1,Calm1,Vsnl1
PF00435	Spectrin repeat	2	21	0.04	ENSMUSP00000097797,ENSMUSP00000099902	Sptan1,Sptbn1
PF01926	50S ribosome-binding GTPase	4	131	0.041	ENSMUSP00000046101,ENSMUSP00000074293,ENSMUSP00000110927,ENSMUSP00000112920	Eef2,Sept11,Sept7,Sept8
PF00385	Chromo (CHRromatin Organisation MOdifier) domain	2	23	0.0448	ENSMUSP00000026662,ENSMUSP00000091475	Cbx1,Cbx2
