# Supplementary material for: Proteomic Profiling of Lysine Acetylation Indicates Mitochondrial Dysfunction in the Hippocampus of Gut Microbiota-Absent Mice
Source: Front Mol Neurosci. 2021 Mar 11;14:594332. doi: 10.3389/fnmol.2021.594332 (PMC7991600; doi:10.3389/fnmol.2021.594332)
Supplement: Supplementary Figure 1 — GO functional classification of the identified acetylated proteins. [file Data_Sheet_1.ZIP › Supplementary Material/Supplementary Table S6.xlsx]

## Sheet: Sheet1
Table S6. Interaction network analysis.
#node1	node2	node1_string_id	node2_string_id	neighborhood_on_chromosome	gene_fusion	phylogenetic_cooccurrence	homology	coexpression	experimentally_determined_interaction	database_annotated	automated_textmining	combined_score
Abat	Ogdh	10090.ENSMUSP00000063548	10090.ENSMUSP00000003461	0	0	0	0	0.049	0	0	0.445	0.449
Abat	Glud1	10090.ENSMUSP00000063548	10090.ENSMUSP00000022322	0.154	0	0	0	0.054	0	0	0.661	0.705
Abat	Pcca	10090.ENSMUSP00000063548	10090.ENSMUSP00000038763	0	0	0	0	0.062	0	0.8	0.184	0.833
Abat	Aldh5a1	10090.ENSMUSP00000063548	10090.ENSMUSP00000040591	0.057	0	0	0	0.531	0.363	0.9	0.635	0.987
Abat	Fahd1	10090.ENSMUSP00000063548	10090.ENSMUSP00000055827	0	0	0	0	0.062	0.544	0	0.138	0.599
Abat	Aldh7a1	10090.ENSMUSP00000063548	10090.ENSMUSP00000133372	0.057	0	0	0	0.126	0.198	0.9	0.162	0.934
Acat1	Cs	10090.ENSMUSP00000034547	10090.ENSMUSP00000005826	0.051	0	0	0	0.118	0.048	0.9	0.354	0.939
Acat1	Glud1	10090.ENSMUSP00000034547	10090.ENSMUSP00000022322	0.044	0	0	0	0.121	0	0	0.427	0.476
Acat1	Aco2	10090.ENSMUSP00000034547	10090.ENSMUSP00000023116	0	0	0	0	0.128	0.694	0	0.225	0.775
Acat1	Etfdh	10090.ENSMUSP00000034547	10090.ENSMUSP00000029386	0	0	0	0	0.438	0	0	0.074	0.457
Acat1	Tpi1	10090.ENSMUSP00000034547	10090.ENSMUSP00000130858	0	0	0	0	0.119	0.047	0	0.355	0.411
Acat1	Dld	10090.ENSMUSP00000034547	10090.ENSMUSP00000106481	0	0	0	0	0.25	0.199	0	0.19	0.471
Acat1	Sucla2	10090.ENSMUSP00000034547	10090.ENSMUSP00000123765	0.043	0	0	0	0.134	0	0.8	0.142	0.838
Acat1	Dlat	10090.ENSMUSP00000034547	10090.ENSMUSP00000034567	0.043	0	0	0	0.191	0	0.9	0.246	0.933
Acat1	Pcca	10090.ENSMUSP00000034547	10090.ENSMUSP00000038763	0.077	0	0	0	0.222	0	0.9	0.302	0.943
Aco2	Ogdh	10090.ENSMUSP00000023116	10090.ENSMUSP00000003461	0.042	0	0	0	0.438	0.175	0	0.759	0.879
Aco2	Cs	10090.ENSMUSP00000023116	10090.ENSMUSP00000005826	0.139	0	0	0	0.496	0.263	0.9	0.718	0.989
Aco2	Pdhx	10090.ENSMUSP00000023116	10090.ENSMUSP00000011058	0.063	0	0	0	0.142	0	0	0.47	0.536
Aco2	Sdha	10090.ENSMUSP00000023116	10090.ENSMUSP00000022062	0.08	0	0	0	0.719	0	0	0.762	0.933
Aco2	Glud1	10090.ENSMUSP00000023116	10090.ENSMUSP00000022322	0	0	0	0	0.098	0.102	0	0.597	0.645
Aco2	Etfdh	10090.ENSMUSP00000023116	10090.ENSMUSP00000029386	0	0	0	0	0.123	0	0	0.35	0.405
Aco2	Ass1	10090.ENSMUSP00000023116	10090.ENSMUSP00000099904	0.083	0	0	0	0.062	0	0	0.373	0.413
Aco2	Gpd2	10090.ENSMUSP00000023116	10090.ENSMUSP00000108237	0.042	0	0	0	0.062	0.256	0	0.242	0.426
Aco2	Ldha	10090.ENSMUSP00000023116	10090.ENSMUSP00000103267	0.076	0	0	0	0.144	0.059	0	0.334	0.438
Aco2	Clybl	10090.ENSMUSP00000023116	10090.ENSMUSP00000026625	0.17	0	0	0	0	0	0	0.355	0.442
Aco2	Iba57	10090.ENSMUSP00000023116	10090.ENSMUSP00000049823	0.042	0	0	0	0	0	0	0.45	0.451
Aco2	Immt	10090.ENSMUSP00000023116	10090.ENSMUSP00000066181	0	0	0	0	0.227	0.057	0	0.31	0.453
Aco2	Pdk3	10090.ENSMUSP00000023116	10090.ENSMUSP00000036604	0	0	0	0	0.061	0.199	0	0.332	0.453
Aco2	Atp5j	10090.ENSMUSP00000023116	10090.ENSMUSP00000023608	0	0	0	0	0.122	0.219	0	0.277	0.461
Aco2	Aldh5a1	10090.ENSMUSP00000023116	10090.ENSMUSP00000040591	0.043	0	0	0	0.081	0.197	0	0.332	0.465
Aco2	Atp5f1	10090.ENSMUSP00000023116	10090.ENSMUSP00000113022	0	0	0	0	0.155	0.238	0	0.243	0.47
Aco2	Slc25a3	10090.ENSMUSP00000023116	10090.ENSMUSP00000075987	0	0	0	0	0.263	0.178	0	0.206	0.477
Aco2	Got2	10090.ENSMUSP00000023116	10090.ENSMUSP00000034097	0	0	0	0	0.238	0	0	0.364	0.495
Aco2	Taldo1	10090.ENSMUSP00000023116	10090.ENSMUSP00000026576	0.043	0	0	0	0.128	0	0	0.473	0.523
Aco2	Tfam	10090.ENSMUSP00000023116	10090.ENSMUSP00000090086	0	0	0	0	0.061	0.151	0	0.455	0.527
Aco2	Hspd1	10090.ENSMUSP00000023116	10090.ENSMUSP00000027123	0	0	0	0	0.16	0.072	0	0.458	0.541
Aco2	Eno1	10090.ENSMUSP00000023116	10090.ENSMUSP00000079727	0	0	0	0	0.077	0.051	0	0.558	0.579
Aco2	Hspa9	10090.ENSMUSP00000023116	10090.ENSMUSP00000025217	0	0	0	0	0.121	0.119	0	0.505	0.583
Aco2	Atp5d	10090.ENSMUSP00000023116	10090.ENSMUSP00000101006	0.105	0	0	0	0.364	0	0	0.329	0.585
Aco2	Atp5h	10090.ENSMUSP00000023116	10090.ENSMUSP00000102147	0	0	0	0	0.163	0.096	0	0.538	0.62
Aco2	Mdh1	10090.ENSMUSP00000023116	10090.ENSMUSP00000099938	0.076	0	0	0	0.166	0.059	0	0.574	0.65
Aco2	Atp5o	10090.ENSMUSP00000023116	10090.ENSMUSP00000023677	0.043	0	0	0	0.239	0.079	0	0.562	0.667
Aco2	Pcx	10090.ENSMUSP00000023116	10090.ENSMUSP00000063825	0.146	0	0	0	0.081	0	0	0.642	0.695
Aco2	Tpi1	10090.ENSMUSP00000023116	10090.ENSMUSP00000130858	0.169	0	0	0	0.154	0	0	0.618	0.708
Aco2	Pdha1	10090.ENSMUSP00000023116	10090.ENSMUSP00000033662	0	0	0	0	0.2	0	0	0.687	0.739
Aco2	Dlat	10090.ENSMUSP00000023116	10090.ENSMUSP00000034567	0.063	0	0	0	0.215	0	0	0.684	0.747
Aco2	Dld	10090.ENSMUSP00000023116	10090.ENSMUSP00000106481	0.051	0	0	0	0.173	0	0	0.721	0.762
Aco2	Atp5a1	10090.ENSMUSP00000023116	10090.ENSMUSP00000026495	0.052	0	0	0	0.382	0	0	0.679	0.795
Aco2	Sucla2	10090.ENSMUSP00000023116	10090.ENSMUSP00000123765	0.097	0	0	0	0.456	0.13	0	0.765	0.886
Aco2	Idh2	10090.ENSMUSP00000023116	10090.ENSMUSP00000103007	0.139	0	0	0	0.136	0.072	0.9	0.739	0.978
Alb	Calr	10090.ENSMUSP00000031314	10090.ENSMUSP00000003912	0	0	0	0	0	0	0	0.569	0.569
Alb	Cs	10090.ENSMUSP00000031314	10090.ENSMUSP00000005826	0	0	0	0	0	0	0	0.575	0.575
Alb	Hspa4	10090.ENSMUSP00000031314	10090.ENSMUSP00000020630	0	0	0	0	0	0.045	0	0.461	0.464
Alb	Rock2	10090.ENSMUSP00000031314	10090.ENSMUSP00000020904	0	0	0	0	0	0	0	0.539	0.539
Alb	Crebbp	10090.ENSMUSP00000031314	10090.ENSMUSP00000023165	0	0	0	0	0	0	0	0.435	0.435
Alb	Hsp90ab1	10090.ENSMUSP00000031314	10090.ENSMUSP00000024739	0	0	0	0	0	0	0	0.586	0.586
Alb	Hspd1	10090.ENSMUSP00000031314	10090.ENSMUSP00000027123	0	0	0	0	0	0	0	0.58	0.58
Alb	Ncl	10090.ENSMUSP00000031314	10090.ENSMUSP00000027438	0	0	0	0	0	0	0	0.471	0.471
Alb	Anxa5	10090.ENSMUSP00000031314	10090.ENSMUSP00000029266	0	0	0	0	0	0	0	0.812	0.812
Alb	Calb1	10090.ENSMUSP00000031314	10090.ENSMUSP00000029876	0	0	0	0	0	0	0	0.621	0.621
Alb	Decr1	10090.ENSMUSP00000031314	10090.ENSMUSP00000029877	0	0	0	0	0.07	0	0	0.731	0.739
Alb	Slc32a1	10090.ENSMUSP00000031314	10090.ENSMUSP00000036299	0	0	0	0	0.052	0	0	0.396	0.402
Alb	Tfam	10090.ENSMUSP00000031314	10090.ENSMUSP00000090086	0	0	0	0	0	0	0	0.403	0.403
Alb	Ldha	10090.ENSMUSP00000031314	10090.ENSMUSP00000103267	0	0	0	0	0.061	0	0	0.399	0.412
Alb	Tpi1	10090.ENSMUSP00000031314	10090.ENSMUSP00000130858	0	0	0	0	0	0	0	0.422	0.422
Alb	Cnp	10090.ENSMUSP00000031314	10090.ENSMUSP00000099409	0	0	0	0	0	0	0	0.426	0.426
Alb	Rac1	10090.ENSMUSP00000031314	10090.ENSMUSP00000079380	0	0	0	0	0	0	0	0.438	0.438
Alb	Sptbn1	10090.ENSMUSP00000031314	10090.ENSMUSP00000099902	0	0	0	0	0	0	0	0.44	0.44
Alb	Hba-a1	10090.ENSMUSP00000031314	10090.ENSMUSP00000090897	0	0	0	0	0.126	0	0	0.394	0.448
Alb	Slc12a2	10090.ENSMUSP00000031314	10090.ENSMUSP00000111023	0	0	0	0	0	0	0	0.457	0.457
Alb	Pcx	10090.ENSMUSP00000031314	10090.ENSMUSP00000063825	0	0	0	0	0.105	0	0	0.422	0.461
Alb	Basp1	10090.ENSMUSP00000031314	10090.ENSMUSP00000053943	0	0	0	0	0	0	0	0.473	0.474
Alb	Hist1h4j	10090.ENSMUSP00000031314	10090.ENSMUSP00000085006	0	0	0	0	0	0	0	0.475	0.475
Alb	Slc1a2	10090.ENSMUSP00000031314	10090.ENSMUSP00000079100	0	0	0	0	0.06	0	0	0.491	0.501
Alb	H2afz	10090.ENSMUSP00000031314	10090.ENSMUSP00000036907	0	0	0	0	0	0.357	0	0.263	0.506
Alb	Syn1	10090.ENSMUSP00000031314	10090.ENSMUSP00000111002	0	0	0	0	0.061	0	0	0.496	0.506
Alb	Got2	10090.ENSMUSP00000031314	10090.ENSMUSP00000034097	0	0	0	0	0	0	0	0.719	0.719
Aldh1l1	Slc1a2	10090.ENSMUSP00000114304	10090.ENSMUSP00000079100	0	0	0	0	0.124	0	0	0.708	0.733
Aldh5a1	Ogdh	10090.ENSMUSP00000040591	10090.ENSMUSP00000003461	0	0	0	0	0.062	0	0.8	0.328	0.862
Aldh5a1	Cs	10090.ENSMUSP00000040591	10090.ENSMUSP00000005826	0.059	0	0	0	0.119	0	0.8	0.398	0.886
Aldh5a1	Glud1	10090.ENSMUSP00000040591	10090.ENSMUSP00000022322	0.058	0	0	0	0.083	0.153	0	0.568	0.642
Aldh5a1	Mdh1	10090.ENSMUSP00000040591	10090.ENSMUSP00000099938	0.043	0	0	0	0.083	0.094	0.8	0.179	0.845
Aldh5a1	Pcx	10090.ENSMUSP00000040591	10090.ENSMUSP00000063825	0	0.001	0	0	0.123	0	0.8	0.261	0.859
Aldh5a1	Idh2	10090.ENSMUSP00000040591	10090.ENSMUSP00000103007	0.044	0	0	0	0.061	0	0.8	0.317	0.86
Aldh7a1	Glud1	10090.ENSMUSP00000133372	10090.ENSMUSP00000022322	0.058	0	0	0	0.088	0.153	0.8	0.314	0.882
Aldh7a1	Pcca	10090.ENSMUSP00000133372	10090.ENSMUSP00000038763	0	0	0	0	0.124	0	0.6	0.337	0.747
Aldh7a1	Fahd1	10090.ENSMUSP00000133372	10090.ENSMUSP00000055827	0.043	0	0	0	0.094	0.456	0	0.101	0.519
Amph	Sptbn1	10090.ENSMUSP00000003345	10090.ENSMUSP00000099902	0	0	0	0	0.122	0.174	0	0.36	0.495
Amph	Pcca	10090.ENSMUSP00000003345	10090.ENSMUSP00000038763	0	0	0	0	0	0	0	0.498	0.497
Amph	Cltc	10090.ENSMUSP00000003345	10090.ENSMUSP00000099475	0	0	0	0	0.061	0.244	0	0.473	0.593
Amph	Syn1	10090.ENSMUSP00000003345	10090.ENSMUSP00000111002	0	0	0	0	0.186	0.161	0	0.451	0.593
Amph	Sh3gl2	10090.ENSMUSP00000003345	10090.ENSMUSP00000030212	0	0	0	0	0.184	0.522	0.9	0.737	0.988
Anxa5	Calr	10090.ENSMUSP00000029266	10090.ENSMUSP00000003912	0	0	0	0	0.061	0	0	0.498	0.509
Anxa5	Hspa4	10090.ENSMUSP00000029266	10090.ENSMUSP00000020630	0	0	0	0	0.061	0.049	0	0.382	0.4
Anxa5	Hsp90ab1	10090.ENSMUSP00000029266	10090.ENSMUSP00000024739	0	0	0	0	0	0.056	0	0.593	0.599
Anxa5	Hspd1	10090.ENSMUSP00000029266	10090.ENSMUSP00000027123	0	0	0	0	0.053	0.048	0	0.571	0.579
Anxa5	Decr1	10090.ENSMUSP00000029266	10090.ENSMUSP00000029877	0	0	0	0	0	0.046	0	0.573	0.575
Ass1	Cs	10090.ENSMUSP00000099904	10090.ENSMUSP00000005826	0	0	0	0	0.119	0	0	0.356	0.408
Ass1	Glud1	10090.ENSMUSP00000099904	10090.ENSMUSP00000022322	0.05	0	0	0	0.082	0	0	0.473	0.501
Ass1	Psat1	10090.ENSMUSP00000099904	10090.ENSMUSP00000025542	0.108	0	0	0	0.098	0	0	0.468	0.535
Ass1	Got2	10090.ENSMUSP00000099904	10090.ENSMUSP00000034097	0	0	0	0	0.128	0	0.9	0.315	0.935
Ass1	Pcx	10090.ENSMUSP00000099904	10090.ENSMUSP00000063825	0	0	0	0	0.061	0.073	0	0.427	0.458
Ass1	Tpi1	10090.ENSMUSP00000099904	10090.ENSMUSP00000130858	0	0	0	0	0	0.185	0	0.323	0.425
Atp2b1	Calm3	10090.ENSMUSP00000020107	10090.ENSMUSP00000019514	0	0	0	0	0.072	0.701	0	0.281	0.783
Atp2b1	Cltc	10090.ENSMUSP00000020107	10090.ENSMUSP00000099475	0	0	0	0	0.16	0.154	0	0.226	0.402
Atp2b1	Ywhaz	10090.ENSMUSP00000020107	10090.ENSMUSP00000022894	0	0	0	0	0.083	0.335	0	0.118	0.416
Atp2b1	Ppp3ca	10090.ENSMUSP00000020107	10090.ENSMUSP00000053101	0	0	0	0	0.295	0.121	0	0.405	0.599
Atp2b1	Calb1	10090.ENSMUSP00000020107	10090.ENSMUSP00000029876	0	0	0	0	0.061	0.325	0	0.424	0.603
Atp5a1	Ogdh	10090.ENSMUSP00000026495	10090.ENSMUSP00000003461	0.167	0	0	0	0.682	0.201	0	0.423	0.861
Atp5a1	Cs	10090.ENSMUSP00000026495	10090.ENSMUSP00000005826	0	0	0	0	0.658	0	0	0.655	0.877
Atp5a1	Pdhx	10090.ENSMUSP00000026495	10090.ENSMUSP00000011058	0.062	0	0	0	0.254	0	0	0.294	0.462
Atp5a1	Atp5e	10090.ENSMUSP00000026495	10090.ENSMUSP00000016396	0	0	0	0	0.419	0.803	0.9	0.671	0.995
Atp5a1	Uqcrb	10090.ENSMUSP00000026495	10090.ENSMUSP00000021993	0	0	0	0	0.213	0	0	0.59	0.664
Atp5a1	Sdha	10090.ENSMUSP00000026495	10090.ENSMUSP00000022062	0.075	0	0	0	0.797	0	0	0.813	0.961
Atp5a1	Glud1	10090.ENSMUSP00000026495	10090.ENSMUSP00000022322	0.043	0	0	0	0.231	0	0	0.409	0.527
Atp5a1	Ndufb4	10090.ENSMUSP00000026495	10090.ENSMUSP00000023514	0	0	0	0	0.199	0	0	0.436	0.529
Atp5a1	Atp5j	10090.ENSMUSP00000026495	10090.ENSMUSP00000023608	0	0	0	0	0.21	0.806	0.9	0.608	0.993
Atp5a1	Atp5o	10090.ENSMUSP00000026495	10090.ENSMUSP00000023677	0.193	0	0	0	0.98	0.806	0.9	0.854	0.999
Atp5a1	Ndufa5	10090.ENSMUSP00000026495	10090.ENSMUSP00000023851	0	0	0	0	0.418	0	0	0.554	0.729
Atp5a1	Hsp90ab1	10090.ENSMUSP00000026495	10090.ENSMUSP00000024739	0	0	0	0	0.13	0.664	0.36	0.315	0.854
Atp5a1	Hspa9	10090.ENSMUSP00000026495	10090.ENSMUSP00000025217	0	0	0	0	0.168	0.197	0	0.656	0.75
Atp5a1	Prdx3	10090.ENSMUSP00000026495	10090.ENSMUSP00000025961	0	0	0	0	0.18	0	0	0.348	0.443
Atp5a1	Ptges3	10090.ENSMUSP00000026495	10090.ENSMUSP00000050292	0	0	0	0	0.406	0	0	0	0.406
Atp5a1	Ndufc2	10090.ENSMUSP00000026495	10090.ENSMUSP00000032882	0	0	0	0	0.209	0	0	0.359	0.472
Atp5a1	Cltc	10090.ENSMUSP00000026495	10090.ENSMUSP00000099475	0	0	0	0	0.126	0.071	0	0.405	0.475
Atp5a1	Uqcr10	10090.ENSMUSP00000026495	10090.ENSMUSP00000054856	0	0	0	0	0.161	0.057	0	0.435	0.514
Atp5a1	Tfam	10090.ENSMUSP00000026495	10090.ENSMUSP00000090086	0	0	0	0	0.095	0.058	0	0.48	0.519
Atp5a1	Immt	10090.ENSMUSP00000026495	10090.ENSMUSP00000066181	0	0	0	0	0.353	0.118	0	0.259	0.54
Atp5a1	Gpd2	10090.ENSMUSP00000026495	10090.ENSMUSP00000108237	0	0	0	0	0.51	0	0	0.103	0.542
Atp5a1	Idh2	10090.ENSMUSP00000026495	10090.ENSMUSP00000103007	0	0	0	0	0.454	0	0	0.262	0.58
Atp5a1	Etfdh	10090.ENSMUSP00000026495	10090.ENSMUSP00000029386	0	0	0	0	0.153	0	0	0.532	0.587
Atp5a1	Atp6v0a1	10090.ENSMUSP00000026495	10090.ENSMUSP00000044838	0.046	0	0	0	0.117	0.071	0.54	0.1	0.616
Atp5a1	Ldha	10090.ENSMUSP00000026495	10090.ENSMUSP00000103267	0.113	0	0	0	0.327	0.123	0	0.365	0.623
Atp5a1	Ywhae	10090.ENSMUSP00000026495	10090.ENSMUSP00000070993	0	0	0	0	0.435	0.072	0	0.35	0.63
Atp5a1	Pdha1	10090.ENSMUSP00000026495	10090.ENSMUSP00000033662	0	0	0	0	0.197	0.046	0	0.562	0.635
Atp5a1	Eno1	10090.ENSMUSP00000026495	10090.ENSMUSP00000079727	0.092	0	0	0	0.255	0	0	0.505	0.636
Atp5a1	Eef2	10090.ENSMUSP00000026495	10090.ENSMUSP00000046101	0.043	0	0	0	0.473	0	0	0.4	0.671
Atp5a1	Tpi1	10090.ENSMUSP00000026495	10090.ENSMUSP00000130858	0.046	0	0	0	0.148	0	0	0.629	0.672
Atp5a1	Dlat	10090.ENSMUSP00000026495	10090.ENSMUSP00000034567	0.062	0	0	0	0.29	0	0	0.549	0.673
Atp5a1	Sucla2	10090.ENSMUSP00000026495	10090.ENSMUSP00000123765	0.075	0	0	0	0.399	0.226	0	0.391	0.703
Atp5a1	Hspd1	10090.ENSMUSP00000026495	10090.ENSMUSP00000027123	0.042	0	0	0	0.255	0	0	0.644	0.723
Atp5a1	Basp1	10090.ENSMUSP00000026495	10090.ENSMUSP00000053943	0	0	0	0	0	0.694	0.36	0	0.795
Atp5a1	Mdh1	10090.ENSMUSP00000026495	10090.ENSMUSP00000099938	0.113	0	0	0	0.701	0.123	0	0.429	0.849
Atp5a1	Ppa2	10090.ENSMUSP00000026495	10090.ENSMUSP00000029644	0	0	0	0	0.362	0	0.65	0.403	0.855
Atp5a1	Dld	10090.ENSMUSP00000026495	10090.ENSMUSP00000106481	0.152	0	0	0	0.772	0	0	0.583	0.912
Atp5a1	Slc25a3	10090.ENSMUSP00000026495	10090.ENSMUSP00000075987	0	0	0	0	0.875	0	0	0.475	0.932
Atp5a1	Atp5h	10090.ENSMUSP00000026495	10090.ENSMUSP00000102147	0	0	0	0	0.682	0.72	0.9	0.745	0.997
Atp5a1	Atp5d	10090.ENSMUSP00000026495	10090.ENSMUSP00000101006	0.193	0	0	0	0.757	0.806	0.9	0.841	0.999
Atp5a1	Atp5f1	10090.ENSMUSP00000026495	10090.ENSMUSP00000113022	0	0	0	0	0.88	0.859	0.9	0.84	0.999
Atp5d	Ogdh	10090.ENSMUSP00000101006	10090.ENSMUSP00000003461	0.162	0	0	0	0.111	0	0	0.629	0.7
Atp5d	Cs	10090.ENSMUSP00000101006	10090.ENSMUSP00000005826	0	0	0	0	0.281	0.122	0	0.372	0.569
Atp5d	Pdhx	10090.ENSMUSP00000101006	10090.ENSMUSP00000011058	0.139	0	0	0	0.177	0	0	0.223	0.401
Atp5d	Atp5e	10090.ENSMUSP00000101006	10090.ENSMUSP00000016396	0	0	0	0	0.824	0.805	0.9	0.799	0.999
Atp5d	Uqcrb	10090.ENSMUSP00000101006	10090.ENSMUSP00000021993	0	0	0	0	0.81	0	0	0.51	0.903
Atp5d	Sdha	10090.ENSMUSP00000101006	10090.ENSMUSP00000022062	0.076	0	0	0	0.214	0	0	0.634	0.711
Atp5d	Atp5j	10090.ENSMUSP00000101006	10090.ENSMUSP00000023608	0	0	0	0	0.824	0.805	0.9	0.417	0.997
Atp5d	Atp5o	10090.ENSMUSP00000101006	10090.ENSMUSP00000023677	0.193	0	0	0	0.905	0.806	0.9	0.852	0.999
Atp5d	Ndufa5	10090.ENSMUSP00000101006	10090.ENSMUSP00000023851	0	0	0	0	0.83	0	0	0.492	0.91
Atp5d	Prdx3	10090.ENSMUSP00000101006	10090.ENSMUSP00000025961	0	0	0	0	0.425	0	0	0.18	0.509
Atp5d	Taldo1	10090.ENSMUSP00000101006	10090.ENSMUSP00000026576	0.193	0	0	0	0.103	0	0	0.378	0.51
Atp5d	Hspd1	10090.ENSMUSP00000101006	10090.ENSMUSP00000027123	0.062	0	0	0	0.076	0	0	0.517	0.545
Atp5d	Ppa2	10090.ENSMUSP00000101006	10090.ENSMUSP00000029644	0	0	0	0	0.169	0	0.65	0.17	0.737
Atp5d	Ndufc2	10090.ENSMUSP00000101006	10090.ENSMUSP00000032882	0	0	0	0	0.818	0	0	0.306	0.868
Atp5d	Dlat	10090.ENSMUSP00000101006	10090.ENSMUSP00000034567	0.139	0	0	0	0.177	0	0	0.415	0.549
Atp5d	Atp6v0a1	10090.ENSMUSP00000101006	10090.ENSMUSP00000044838	0	0	0	0	0.062	0	0.54	0.225	0.636
Atp5d	Uqcr10	10090.ENSMUSP00000101006	10090.ENSMUSP00000054856	0	0	0	0	0.816	0	0	0.465	0.897
Atp5d	Slc25a3	10090.ENSMUSP00000101006	10090.ENSMUSP00000075987	0	0	0	0	0.694	0	0	0.363	0.797
Atp5d	Mdh1	10090.ENSMUSP00000101006	10090.ENSMUSP00000099938	0.116	0	0	0	0.215	0	0	0.229	0.419
Atp5d	Sucla2	10090.ENSMUSP00000101006	10090.ENSMUSP00000123765	0.101	0	0	0	0.231	0	0	0.521	0.64
Atp5d	Tpi1	10090.ENSMUSP00000101006	10090.ENSMUSP00000130858	0.177	0	0	0	0.281	0	0	0.525	0.694
Atp5d	Atp5h	10090.ENSMUSP00000101006	10090.ENSMUSP00000102147	0	0	0	0	0.821	0.719	0.9	0.719	0.998
Atp5d	Atp5f1	10090.ENSMUSP00000101006	10090.ENSMUSP00000113022	0	0	0	0	0.868	0.859	0.9	0.788	0.999
Atp5e	Sdha	10090.ENSMUSP00000016396	10090.ENSMUSP00000022062	0	0	0	0	0.062	0.056	0	0.418	0.439
Atp5e	Ndufb4	10090.ENSMUSP00000016396	10090.ENSMUSP00000023514	0	0	0	0	0.408	0	0	0.273	0.552
Atp5e	Atp6v0a1	10090.ENSMUSP00000016396	10090.ENSMUSP00000044838	0	0	0	0	0.062	0	0.54	0.235	0.641
Atp5e	Ppa2	10090.ENSMUSP00000016396	10090.ENSMUSP00000029644	0	0	0	0	0.113	0	0.65	0.165	0.718
Atp5e	Uqcr10	10090.ENSMUSP00000016396	10090.ENSMUSP00000054856	0	0	0	0	0.65	0	0	0.366	0.768
Atp5e	Uqcrb	10090.ENSMUSP00000016396	10090.ENSMUSP00000021993	0	0	0	0	0.826	0	0	0.266	0.867
Atp5e	Ndufc2	10090.ENSMUSP00000016396	10090.ENSMUSP00000032882	0	0	0	0	0.824	0	0	0.405	0.891
Atp5e	Ndufa5	10090.ENSMUSP00000016396	10090.ENSMUSP00000023851	0	0	0	0	0.937	0	0	0.37	0.959
Atp5e	Atp5f1	10090.ENSMUSP00000016396	10090.ENSMUSP00000113022	0	0	0	0	0.324	0.796	0.9	0.668	0.994
Atp5e	Atp5o	10090.ENSMUSP00000016396	10090.ENSMUSP00000023677	0	0	0	0	0.548	0.796	0.9	0.69	0.996
Atp5e	Atp5h	10090.ENSMUSP00000016396	10090.ENSMUSP00000102147	0	0	0	0	0.879	0.703	0.9	0.42	0.997
Atp5e	Atp5j	10090.ENSMUSP00000016396	10090.ENSMUSP00000023608	0	0	0	0	0.871	0.808	0.9	0.25	0.997
Atp5f1	Ogdh	10090.ENSMUSP00000113022	10090.ENSMUSP00000003461	0	0	0	0	0.099	0	0	0.428	0.462
Atp5f1	Uqcrb	10090.ENSMUSP00000113022	10090.ENSMUSP00000021993	0	0	0	0	0.833	0.6	0	0.434	0.958
Atp5f1	Sdha	10090.ENSMUSP00000113022	10090.ENSMUSP00000022062	0	0	0	0	0.229	0.197	0	0.402	0.598
Atp5f1	Ndufb4	10090.ENSMUSP00000113022	10090.ENSMUSP00000023514	0	0	0	0	0.345	0	0	0.466	0.636
Atp5f1	Atp5j	10090.ENSMUSP00000113022	10090.ENSMUSP00000023608	0	0	0	0	0.877	0.859	0.9	0.717	0.999
Atp5f1	Atp5o	10090.ENSMUSP00000113022	10090.ENSMUSP00000023677	0	0	0	0	0.945	0.806	0.9	0.84	0.999
Atp5f1	Ndufa5	10090.ENSMUSP00000113022	10090.ENSMUSP00000023851	0	0	0	0	0.826	0	0	0.597	0.926
Atp5f1	Prdx3	10090.ENSMUSP00000113022	10090.ENSMUSP00000025961	0	0	0	0	0.681	0	0	0.308	0.77
Atp5f1	Hspd1	10090.ENSMUSP00000113022	10090.ENSMUSP00000027123	0	0	0	0	0.348	0.057	0	0.22	0.479
Atp5f1	Ppa2	10090.ENSMUSP00000113022	10090.ENSMUSP00000029644	0	0	0	0	0.246	0	0.65	0.41	0.83
Atp5f1	Ndufc2	10090.ENSMUSP00000113022	10090.ENSMUSP00000032882	0	0	0	0	0.814	0	0	0.571	0.917
Atp5f1	Atp6v0a1	10090.ENSMUSP00000113022	10090.ENSMUSP00000044838	0	0	0	0	0.062	0.05	0.54	0.389	0.716
Atp5f1	Uqcr10	10090.ENSMUSP00000113022	10090.ENSMUSP00000054856	0	0	0	0	0.331	0	0	0.455	0.62
Atp5f1	Immt	10090.ENSMUSP00000113022	10090.ENSMUSP00000066181	0	0	0	0	0.246	0.062	0	0.517	0.628
Atp5f1	Slc25a3	10090.ENSMUSP00000113022	10090.ENSMUSP00000075987	0	0	0	0	0.807	0.179	0	0.183	0.859
Atp5f1	Mdh1	10090.ENSMUSP00000113022	10090.ENSMUSP00000099938	0	0	0	0	0.552	0	0	0.103	0.581
Atp5f1	Atp5h	10090.ENSMUSP00000113022	10090.ENSMUSP00000102147	0	0	0	0	0.82	0.763	0.9	0.79	0.998
Atp5f1	Idh2	10090.ENSMUSP00000113022	10090.ENSMUSP00000103007	0	0	0	0	0.686	0	0	0.107	0.707
Atp5f1	Dld	10090.ENSMUSP00000113022	10090.ENSMUSP00000106481	0	0	0	0	0.782	0	0	0.085	0.792
Atp5f1	Sucla2	10090.ENSMUSP00000113022	10090.ENSMUSP00000123765	0	0	0	0	0.669	0	0	0.127	0.699
Atp5h	Uqcrb	10090.ENSMUSP00000102147	10090.ENSMUSP00000021993	0	0	0	0	0.807	0	0	0.425	0.884
Atp5h	Sdha	10090.ENSMUSP00000102147	10090.ENSMUSP00000022062	0	0	0	0	0.158	0	0	0.371	0.448
Atp5h	Ndufb4	10090.ENSMUSP00000102147	10090.ENSMUSP00000023514	0	0	0	0	0.545	0	0	0.273	0.655
Atp5h	Atp5j	10090.ENSMUSP00000102147	10090.ENSMUSP00000023608	0	0	0	0	0.858	0.719	0.9	0.684	0.998
Atp5h	Atp5o	10090.ENSMUSP00000102147	10090.ENSMUSP00000023677	0	0	0	0	0.893	0.719	0.9	0.785	0.999
Atp5h	Ndufa5	10090.ENSMUSP00000102147	10090.ENSMUSP00000023851	0	0	0	0	0.896	0	0	0.565	0.952
Atp5h	Prdx3	10090.ENSMUSP00000102147	10090.ENSMUSP00000025961	0	0	0	0	0.346	0	0	0.37	0.57
Atp5h	Ppa2	10090.ENSMUSP00000102147	10090.ENSMUSP00000029644	0	0	0	0	0.207	0.045	0.65	0.387	0.815
Atp5h	Ndufc2	10090.ENSMUSP00000102147	10090.ENSMUSP00000032882	0	0	0	0	0.758	0	0	0.455	0.862
Atp5h	Cisd1	10090.ENSMUSP00000102147	10090.ENSMUSP00000043559	0	0	0	0	0.474	0.183	0	0	0.552
Atp5h	Atp6v0a1	10090.ENSMUSP00000102147	10090.ENSMUSP00000044838	0	0	0	0	0.098	0	0.54	0.134	0.609
Atp5h	Uqcr10	10090.ENSMUSP00000102147	10090.ENSMUSP00000054856	0	0	0	0	0.779	0	0	0.206	0.817
Atp5h	Slc25a3	10090.ENSMUSP00000102147	10090.ENSMUSP00000075987	0	0	0	0	0.502	0	0	0.159	0.563
Atp5h	Mdh1	10090.ENSMUSP00000102147	10090.ENSMUSP00000099938	0	0	0	0	0.472	0	0	0.106	0.508
Atp5j	Ogdh	10090.ENSMUSP00000023608	10090.ENSMUSP00000003461	0	0	0	0	0.062	0	0	0.401	0.414
Atp5j	Uqcrb	10090.ENSMUSP00000023608	10090.ENSMUSP00000021993	0	0	0	0	0.877	0	0	0.264	0.906
Atp5j	Sdha	10090.ENSMUSP00000023608	10090.ENSMUSP00000022062	0	0	0	0	0.112	0	0	0.395	0.44
Atp5j	Ndufb4	10090.ENSMUSP00000023608	10090.ENSMUSP00000023514	0	0	0	0	0.833	0	0	0.459	0.905
Atp5j	Decr1	10090.ENSMUSP00000023608	10090.ENSMUSP00000029877	0	0	0	0	0	0	0	0.438	0.438
Atp5j	Mdh1	10090.ENSMUSP00000023608	10090.ENSMUSP00000099938	0	0	0	0	0.391	0.048	0	0.136	0.456
Atp5j	Taldo1	10090.ENSMUSP00000023608	10090.ENSMUSP00000026576	0	0	0	0	0	0	0	0.483	0.483
Atp5j	Tpi1	10090.ENSMUSP00000023608	10090.ENSMUSP00000130858	0	0	0	0	0.109	0	0	0.464	0.502
Atp5j	Prdx3	10090.ENSMUSP00000023608	10090.ENSMUSP00000025961	0	0	0	0	0.149	0.197	0	0.333	0.505
Atp5j	Atp6v0a1	10090.ENSMUSP00000023608	10090.ENSMUSP00000044838	0	0	0	0	0	0	0.54	0.042	0.54
Atp5j	Ppa2	10090.ENSMUSP00000023608	10090.ENSMUSP00000029644	0	0	0	0	0.147	0	0.65	0.382	0.799
Atp5j	Ndufc2	10090.ENSMUSP00000023608	10090.ENSMUSP00000032882	0	0	0	0	0.62	0	0	0.497	0.801
Atp5j	Uqcr10	10090.ENSMUSP00000023608	10090.ENSMUSP00000054856	0	0	0	0	0.849	0	0	0.187	0.872
Atp5j	Ndufa5	10090.ENSMUSP00000023608	10090.ENSMUSP00000023851	0	0	0	0	0.928	0	0	0.635	0.972
Atp5j	Atp5o	10090.ENSMUSP00000023608	10090.ENSMUSP00000023677	0	0	0	0	0.922	0.805	0.9	0.702	0.999
Atp5o	Ogdh	10090.ENSMUSP00000023677	10090.ENSMUSP00000003461	0.167	0	0	0	0.117	0	0	0.341	0.473
Atp5o	Cs	10090.ENSMUSP00000023677	10090.ENSMUSP00000005826	0	0	0	0	0.262	0	0	0.38	0.523
Atp5o	Uqcrb	10090.ENSMUSP00000023677	10090.ENSMUSP00000021993	0	0	0	0	0.848	0	0	0.448	0.912
Atp5o	Sdha	10090.ENSMUSP00000023677	10090.ENSMUSP00000022062	0.076	0	0	0	0.192	0	0	0.611	0.684
Atp5o	Ndufb4	10090.ENSMUSP00000023677	10090.ENSMUSP00000023514	0	0	0	0	0.743	0	0	0.339	0.823
Atp5o	Tpi1	10090.ENSMUSP00000023677	10090.ENSMUSP00000130858	0.043	0	0	0	0.196	0	0	0.319	0.431
Atp5o	Dlat	10090.ENSMUSP00000023677	10090.ENSMUSP00000034567	0.062	0	0	0	0.178	0	0	0.353	0.458
Atp5o	Ldha	10090.ENSMUSP00000023677	10090.ENSMUSP00000103267	0.105	0	0	0	0.274	0.072	0	0.259	0.494
Atp5o	Prdx3	10090.ENSMUSP00000023677	10090.ENSMUSP00000025961	0	0	0	0	0.335	0	0	0.285	0.504
Atp5o	Tfam	10090.ENSMUSP00000023677	10090.ENSMUSP00000090086	0	0	0	0	0.062	0	0	0.535	0.545
Atp5o	Dld	10090.ENSMUSP00000023677	10090.ENSMUSP00000106481	0.153	0	0	0	0.435	0	0	0.239	0.604
Atp5o	Sucla2	10090.ENSMUSP00000023677	10090.ENSMUSP00000123765	0.069	0	0	0	0.23	0	0	0.502	0.612
Atp5o	Slc25a3	10090.ENSMUSP00000023677	10090.ENSMUSP00000075987	0	0	0	0	0.659	0	0	0.196	0.714
Atp5o	Ppa2	10090.ENSMUSP00000023677	10090.ENSMUSP00000029644	0	0	0	0	0.287	0.05	0.65	0.31	0.814
Atp5o	Mdh1	10090.ENSMUSP00000023677	10090.ENSMUSP00000099938	0.105	0	0	0	0.756	0.072	0	0.222	0.821
Atp5o	Atp6v0a1	10090.ENSMUSP00000023677	10090.ENSMUSP00000044838	0	0	0	0	0.06	0.738	0.54	0.059	0.879
Atp5o	Ndufc2	10090.ENSMUSP00000023677	10090.ENSMUSP00000032882	0	0	0	0	0.811	0	0	0.503	0.902
Atp5o	Uqcr10	10090.ENSMUSP00000023677	10090.ENSMUSP00000054856	0	0	0	0	0.878	0.05	0	0.402	0.925
Atp5o	Ndufa5	10090.ENSMUSP00000023677	10090.ENSMUSP00000023851	0	0	0	0	0.898	0	0	0.537	0.95
Atp6v0a1	Ppa2	10090.ENSMUSP00000044838	10090.ENSMUSP00000029644	0	0	0	0	0.062	0	0.65	0.074	0.669
Atp6v0a1	Rac1	10090.ENSMUSP00000044838	10090.ENSMUSP00000079380	0	0	0	0	0.073	0.05	0.9	0.049	0.905
C1qbp	Calr	10090.ENSMUSP00000077612	10090.ENSMUSP00000003912	0	0	0	0	0.061	0	0	0.457	0.468
C1qbp	Hspd1	10090.ENSMUSP00000077612	10090.ENSMUSP00000027123	0	0	0	0	0.681	0.101	0	0	0.701
C1qbp	Tfam	10090.ENSMUSP00000077612	10090.ENSMUSP00000090086	0	0	0	0	0.113	0.497	0	0.115	0.571
Calb1	Calr	10090.ENSMUSP00000029876	10090.ENSMUSP00000003912	0	0	0	0	0	0	0	0.537	0.537
Calb1	Decr1	10090.ENSMUSP00000029876	10090.ENSMUSP00000029877	0	0	0	0	0	0.076	0	0.407	0.429
Calb1	Ppp3ca	10090.ENSMUSP00000029876	10090.ENSMUSP00000053101	0	0	0	0	0.071	0.349	0	0.175	0.458
Calb1	Cnp	10090.ENSMUSP00000029876	10090.ENSMUSP00000099409	0	0	0	0	0.046	0.158	0	0.47	0.537
Calb1	Syn1	10090.ENSMUSP00000029876	10090.ENSMUSP00000111002	0	0	0	0	0.118	0.152	0	0.471	0.57
Calb1	Slc32a1	10090.ENSMUSP00000029876	10090.ENSMUSP00000036299	0	0	0	0	0.217	0.045	0	0.699	0.755
Calm3	Ywhaz	10090.ENSMUSP00000019514	10090.ENSMUSP00000022894	0	0	0	0	0.089	0.335	0	0.142	0.435
Calm3	Ywhae	10090.ENSMUSP00000019514	10090.ENSMUSP00000070993	0	0	0	0	0.088	0.328	0	0.196	0.464
Calm3	Eef2	10090.ENSMUSP00000019514	10090.ENSMUSP00000046101	0	0	0	0	0.062	0	0	0.453	0.465
Calm3	Pygb	10090.ENSMUSP00000019514	10090.ENSMUSP00000035743	0	0	0	0	0.089	0.341	0	0.184	0.467
Calm3	Syn1	10090.ENSMUSP00000019514	10090.ENSMUSP00000111002	0	0	0	0	0.119	0.277	0	0.269	0.494
Calm3	Hsp90ab1	10090.ENSMUSP00000019514	10090.ENSMUSP00000024739	0	0	0	0	0.062	0.251	0	0.387	0.532
Calm3	Sptan1	10090.ENSMUSP00000019514	10090.ENSMUSP00000097797	0	0	0	0.762	0.069	0.72	0	0	0.728
Calm3	Ppp3ca	10090.ENSMUSP00000019514	10090.ENSMUSP00000053101	0	0	0	0	0.085	0.95	0	0.48	0.974
Calr	Eef2	10090.ENSMUSP00000003912	10090.ENSMUSP00000046101	0	0.023	0	0	0.142	0.219	0	0.234	0.442
Calr	Hspd1	10090.ENSMUSP00000003912	10090.ENSMUSP00000027123	0	0	0	0	0.108	0	0	0.482	0.518
Calr	Eno1	10090.ENSMUSP00000003912	10090.ENSMUSP00000079727	0	0	0	0	0.087	0.161	0	0.425	0.522
Calr	Hspa4	10090.ENSMUSP00000003912	10090.ENSMUSP00000020630	0	0	0	0	0.137	0.055	0	0.519	0.573
Calr	Hspa9	10090.ENSMUSP00000003912	10090.ENSMUSP00000025217	0	0	0	0	0.141	0.049	0	0.546	0.597
Calr	Tpi1	10090.ENSMUSP00000003912	10090.ENSMUSP00000130858	0	0	0	0	0.08	0	0	0.651	0.666
Calr	Ptges3	10090.ENSMUSP00000003912	10090.ENSMUSP00000050292	0	0	0	0	0.062	0.746	0	0.091	0.764
Calr	Hsp90ab1	10090.ENSMUSP00000003912	10090.ENSMUSP00000024739	0	0	0	0	0.242	0.253	0	0.798	0.875
Cbx1	H2afz	10090.ENSMUSP00000091475	10090.ENSMUSP00000036907	0	0	0	0	0.175	0.227	0	0.425	0.602
Cbx1	Slc25a3	10090.ENSMUSP00000091475	10090.ENSMUSP00000075987	0	0	0	0	0.062	0	0	0.432	0.444
Cbx1	Hist1h4j	10090.ENSMUSP00000091475	10090.ENSMUSP00000085006	0	0	0	0	0.062	0.354	0	0.349	0.571
Cbx1	H3f3a	10090.ENSMUSP00000091475	10090.ENSMUSP00000124509	0	0	0	0	0.068	0.771	0	0.318	0.841
Cltc	Ywhaz	10090.ENSMUSP00000099475	10090.ENSMUSP00000022894	0	0	0	0	0.166	0.335	0	0.342	0.604
Cltc	Ywhae	10090.ENSMUSP00000099475	10090.ENSMUSP00000070993	0	0	0	0	0.181	0.218	0	0.252	0.479
Cltc	Copa	10090.ENSMUSP00000099475	10090.ENSMUSP00000118179	0	0	0	0	0.54	0	0.36	0.331	0.786
Clybl	Cs	10090.ENSMUSP00000026625	10090.ENSMUSP00000005826	0.126	0	0	0	0.053	0	0	0.565	0.608
Clybl	Pcx	10090.ENSMUSP00000026625	10090.ENSMUSP00000063825	0	0	0	0	0.062	0	0	0.397	0.41
Clybl	Tpi1	10090.ENSMUSP00000026625	10090.ENSMUSP00000130858	0	0	0	0	0.056	0	0	0.616	0.622
Copa	Sptan1	10090.ENSMUSP00000118179	10090.ENSMUSP00000097797	0	0	0	0	0.122	0	0.9	0	0.908
Copa	Sptbn1	10090.ENSMUSP00000118179	10090.ENSMUSP00000099902	0	0	0	0	0	0	0.9	0	0.9
Crebbp	H2afy2	10090.ENSMUSP00000023165	10090.ENSMUSP00000020283	0	0	0	0	0	0.353	0.9	0.107	0.937
Crebbp	Hsp90ab1	10090.ENSMUSP00000023165	10090.ENSMUSP00000024739	0	0.016	0	0	0	0.126	0	0.45	0.499
Crebbp	H2afj	10090.ENSMUSP00000023165	10090.ENSMUSP00000074142	0	0	0	0	0	0.42	0.9	0.072	0.941
Crebbp	H2afz	10090.ENSMUSP00000023165	10090.ENSMUSP00000036907	0	0	0	0	0.062	0.2	0.9	0.606	0.966
Crebbp	Ep300	10090.ENSMUSP00000023165	10090.ENSMUSP00000066789	0	0	0	0.956	0.808	0.197	0.9	0.92	0.983
Crebbp	Hist1h4j	10090.ENSMUSP00000023165	10090.ENSMUSP00000085006	0	0	0	0	0.048	0.954	0	0.66	0.983
Crebbp	H3f3a	10090.ENSMUSP00000023165	10090.ENSMUSP00000124509	0	0	0	0	0	0.958	0.9	0.298	0.996
Cs	Ogdh	10090.ENSMUSP00000005826	10090.ENSMUSP00000003461	0.139	0	0	0	0.458	0	0	0.622	0.808
Cs	Prdx3	10090.ENSMUSP00000005826	10090.ENSMUSP00000025961	0	0	0	0	0.178	0.047	0	0.299	0.403
Cs	Nnt	10090.ENSMUSP00000005826	10090.ENSMUSP00000096753	0	0	0	0	0.062	0	0	0.416	0.428
Cs	Gpd2	10090.ENSMUSP00000005826	10090.ENSMUSP00000108237	0.043	0	0	0	0.096	0.134	0	0.342	0.441
Cs	Etfdh	10090.ENSMUSP00000005826	10090.ENSMUSP00000029386	0	0	0	0	0.131	0	0	0.391	0.449
Cs	Immt	10090.ENSMUSP00000005826	10090.ENSMUSP00000066181	0	0	0	0	0.201	0.056	0	0.342	0.461
Cs	Psat1	10090.ENSMUSP00000005826	10090.ENSMUSP00000025542	0.172	0	0	0	0.061	0	0	0.382	0.478
Cs	Hsp90ab1	10090.ENSMUSP00000005826	10090.ENSMUSP00000024739	0	0	0	0	0.094	0.05	0	0.442	0.478
Cs	Eno1	10090.ENSMUSP00000005826	10090.ENSMUSP00000079727	0.107	0	0	0	0.164	0.05	0	0.462	0.567
Cs	Slc25a3	10090.ENSMUSP00000005826	10090.ENSMUSP00000075987	0	0	0	0	0.502	0	0	0.206	0.588
Cs	Hspa9	10090.ENSMUSP00000005826	10090.ENSMUSP00000025217	0	0	0	0	0.165	0.065	0	0.523	0.595
Cs	Decr1	10090.ENSMUSP00000005826	10090.ENSMUSP00000029877	0	0	0	0	0.062	0.046	0	0.614	0.624
Cs	Hspd1	10090.ENSMUSP00000005826	10090.ENSMUSP00000027123	0	0	0	0	0.217	0.057	0	0.533	0.625
Cs	Pdha1	10090.ENSMUSP00000005826	10090.ENSMUSP00000033662	0	0	0	0	0.27	0.177	0	0.504	0.676
Cs	Taldo1	10090.ENSMUSP00000005826	10090.ENSMUSP00000026576	0	0	0	0	0.121	0	0	0.655	0.684
Cs	Idh2	10090.ENSMUSP00000005826	10090.ENSMUSP00000103007	0.164	0	0	0	0.15	0	0	0.604	0.694
Cs	Dld	10090.ENSMUSP00000005826	10090.ENSMUSP00000106481	0.074	0	0	0	0.221	0.075	0	0.666	0.747
Cs	Pdhx	10090.ENSMUSP00000005826	10090.ENSMUSP00000011058	0.116	0	0	0	0.212	0.432	0	0.439	0.748
Cs	Ldha	10090.ENSMUSP00000005826	10090.ENSMUSP00000103267	0.085	0	0	0	0.292	0.128	0	0.639	0.769
Cs	Sucla2	10090.ENSMUSP00000005826	10090.ENSMUSP00000123765	0.139	0	0	0	0.225	0.259	0	0.603	0.777
Cs	Tpi1	10090.ENSMUSP00000005826	10090.ENSMUSP00000130858	0.122	0	0	0	0.135	0	0	0.747	0.791
Cs	Tfam	10090.ENSMUSP00000005826	10090.ENSMUSP00000090086	0	0	0	0	0.061	0	0	0.834	0.837
Cs	Glud1	10090.ENSMUSP00000005826	10090.ENSMUSP00000022322	0	0	0	0	0.197	0.095	0.8	0.5	0.917
Cs	Got2	10090.ENSMUSP00000005826	10090.ENSMUSP00000034097	0	0	0	0	0.122	0	0.8	0.644	0.932
Cs	Sdha	10090.ENSMUSP00000005826	10090.ENSMUSP00000022062	0.172	0	0	0	0.328	0.61	0	0.809	0.953
Cs	Mdh1	10090.ENSMUSP00000005826	10090.ENSMUSP00000099938	0.085	0	0	0	0.276	0.128	0.9	0.668	0.977
Cs	Pcx	10090.ENSMUSP00000005826	10090.ENSMUSP00000063825	0.167	0	0	0	0.062	0.05	0.9	0.847	0.986
Cs	Dlat	10090.ENSMUSP00000005826	10090.ENSMUSP00000034567	0.116	0	0	0	0.305	0.683	0.9	0.607	0.99
Cyb5r1	Decr1	10090.ENSMUSP00000027726	10090.ENSMUSP00000029877	0.042	0	0	0	0.062	0.05	0	0.444	0.462
Cyb5r1	Hba-a1	10090.ENSMUSP00000027726	10090.ENSMUSP00000090897	0	0	0	0	0.061	0.05	0.9	0.059	0.904
Cyfip1	Sptan1	10090.ENSMUSP00000032629	10090.ENSMUSP00000097797	0	0	0	0	0.062	0.238	0.9	0.221	0.936
Cyfip1	Rac1	10090.ENSMUSP00000032629	10090.ENSMUSP00000079380	0	0	0	0	0.062	0.448	0.9	0.66	0.98
D10Jhu81e	Fahd1	10090.ENSMUSP00000001242	10090.ENSMUSP00000055827	0	0	0	0	0.105	0	0	0.393	0.433
Dbi	Got2	10090.ENSMUSP00000114705	10090.ENSMUSP00000034097	0	0	0	0	0.062	0	0	0.625	0.634
Decr1	Ogdh	10090.ENSMUSP00000029877	10090.ENSMUSP00000003461	0	0	0	0	0.061	0.048	0	0.568	0.58
Decr1	Rock2	10090.ENSMUSP00000029877	10090.ENSMUSP00000020904	0	0	0	0	0	0.05	0	0.528	0.532
Decr1	Sdha	10090.ENSMUSP00000029877	10090.ENSMUSP00000022062	0.051	0	0	0	0.115	0	0	0.371	0.426
Decr1	Glud1	10090.ENSMUSP00000029877	10090.ENSMUSP00000022322	0.041	0	0	0	0	0.046	0	0.462	0.465
Decr1	Hsp90ab1	10090.ENSMUSP00000029877	10090.ENSMUSP00000024739	0	0	0	0	0.06	0.189	0	0.542	0.62
Decr1	Prdx3	10090.ENSMUSP00000029877	10090.ENSMUSP00000025961	0	0	0	0	0.092	0.057	0	0.5	0.534
Decr1	Taldo1	10090.ENSMUSP00000029877	10090.ENSMUSP00000026576	0.057	0	0	0	0.062	0	0	0.645	0.659
Decr1	Mdh1	10090.ENSMUSP00000029877	10090.ENSMUSP00000099938	0	0	0	0	0.109	0.066	0	0.363	0.425
Decr1	Dld	10090.ENSMUSP00000029877	10090.ENSMUSP00000106481	0	0	0	0	0.062	0.114	0	0.411	0.467
Decr1	Got2	10090.ENSMUSP00000029877	10090.ENSMUSP00000034097	0	0	0	0	0.06	0.092	0	0.425	0.467
Decr1	Tfam	10090.ENSMUSP00000029877	10090.ENSMUSP00000090086	0	0	0	0	0.06	0	0	0.472	0.482
Decr1	Tpi1	10090.ENSMUSP00000029877	10090.ENSMUSP00000130858	0	0	0	0	0.061	0.155	0	0.532	0.596
Decr1	Ldha	10090.ENSMUSP00000029877	10090.ENSMUSP00000103267	0	0	0	0	0.062	0.066	0	0.585	0.605
Decr1	Pcx	10090.ENSMUSP00000029877	10090.ENSMUSP00000063825	0	0	0	0	0.079	0	0	0.595	0.611
Decr1	Rac1	10090.ENSMUSP00000029877	10090.ENSMUSP00000079380	0	0	0	0	0	0.094	0	0.678	0.696
Decr1	Nnt	10090.ENSMUSP00000029877	10090.ENSMUSP00000096753	0	0	0	0	0.077	0	0	0.686	0.698
Decr1	Idh2	10090.ENSMUSP00000029877	10090.ENSMUSP00000103007	0	0	0	0	0.088	0	0	0.705	0.719
Dlat	Ogdh	10090.ENSMUSP00000034567	10090.ENSMUSP00000003461	0.098	0	0.237	0	0.284	0.707	0.9	0.561	0.992
Dlat	Pdhx	10090.ENSMUSP00000034567	10090.ENSMUSP00000011058	0	0	0.445	0.868	0.116	0.686	0.9	0.702	0.974
Dlat	Sdha	10090.ENSMUSP00000034567	10090.ENSMUSP00000022062	0.164	0	0	0	0.356	0	0	0.55	0.737
Dlat	Hspd1	10090.ENSMUSP00000034567	10090.ENSMUSP00000027123	0.041	0	0	0	0.326	0.049	0	0.218	0.455
Dlat	Etfdh	10090.ENSMUSP00000034567	10090.ENSMUSP00000029386	0	0	0	0	0.152	0	0	0.353	0.428
Dlat	Pdha1	10090.ENSMUSP00000034567	10090.ENSMUSP00000033662	0	0	0.434	0	0.775	0.716	0.9	0.82	0.999
Dlat	Ldha	10090.ENSMUSP00000034567	10090.ENSMUSP00000103267	0.072	0	0	0	0.152	0.047	0	0.301	0.406
Dlat	Idh2	10090.ENSMUSP00000034567	10090.ENSMUSP00000103007	0	0	0	0	0.153	0	0	0.457	0.52
Dlat	Eno1	10090.ENSMUSP00000034567	10090.ENSMUSP00000079727	0.076	0	0	0	0.136	0	0	0.47	0.54
Dlat	Mdh1	10090.ENSMUSP00000034567	10090.ENSMUSP00000099938	0.072	0	0	0	0.223	0.047	0	0.467	0.585
Dlat	Tpi1	10090.ENSMUSP00000034567	10090.ENSMUSP00000130858	0.115	0	0	0	0.087	0	0	0.534	0.59
Dlat	Slc25a3	10090.ENSMUSP00000034567	10090.ENSMUSP00000075987	0	0	0	0	0.445	0.155	0	0.21	0.597
Dlat	Pcx	10090.ENSMUSP00000034567	10090.ENSMUSP00000063825	0.06	0	0	0	0.089	0	0.8	0.549	0.912
Dlat	Sucla2	10090.ENSMUSP00000034567	10090.ENSMUSP00000123765	0.098	0	0	0	0.371	0.154	0.8	0.585	0.953
Dlat	Pdk3	10090.ENSMUSP00000034567	10090.ENSMUSP00000036604	0	0	0	0	0.062	0.817	0.9	0.372	0.987
Dlat	Dld	10090.ENSMUSP00000034567	10090.ENSMUSP00000106481	0.077	0.5	0.37	0	0.595	0.752	0.9	0.85	0.999
Dld	Ogdh	10090.ENSMUSP00000106481	10090.ENSMUSP00000003461	0.088	0	0.222	0	0.139	0.736	0.9	0.684	0.993
Dld	Pdhx	10090.ENSMUSP00000106481	10090.ENSMUSP00000011058	0.077	0.001	0.389	0	0.548	0.809	0.9	0.82	0.998
Dld	Sdha	10090.ENSMUSP00000106481	10090.ENSMUSP00000022062	0.152	0	0	0	0.554	0.199	0	0.383	0.788
Dld	Glud1	10090.ENSMUSP00000106481	10090.ENSMUSP00000022322	0.129	0	0	0	0.312	0.047	0.8	0.431	0.923
Dld	Hspa9	10090.ENSMUSP00000106481	10090.ENSMUSP00000025217	0.042	0	0	0	0.202	0.05	0	0.335	0.453
Dld	Taldo1	10090.ENSMUSP00000106481	10090.ENSMUSP00000026576	0.13	0	0	0	0.149	0	0	0.476	0.578
Dld	Hspd1	10090.ENSMUSP00000106481	10090.ENSMUSP00000027123	0	0	0	0	0.336	0.196	0	0.327	0.609
Dld	Etfdh	10090.ENSMUSP00000106481	10090.ENSMUSP00000029386	0	0	0	0	0.299	0	0	0.537	0.661
Dld	Pdha1	10090.ENSMUSP00000106481	10090.ENSMUSP00000033662	0	0	0.226	0	0.473	0.686	0.9	0.762	0.996
Dld	Got2	10090.ENSMUSP00000106481	10090.ENSMUSP00000034097	0	0	0	0	0.167	0	0	0.35	0.436
Dld	Pdk3	10090.ENSMUSP00000106481	10090.ENSMUSP00000036604	0	0	0	0	0.06	0.632	0.9	0.543	0.982
Dld	Mcee	10090.ENSMUSP00000106481	10090.ENSMUSP00000047855	0.061	0	0	0	0.135	0	0	0.541	0.594
Dld	Pcx	10090.ENSMUSP00000106481	10090.ENSMUSP00000063825	0.11	0	0	0	0.076	0	0	0.556	0.603
Dld	Slc25a3	10090.ENSMUSP00000106481	10090.ENSMUSP00000075987	0	0	0	0	0.264	0	0	0.314	0.474
Dld	Eno1	10090.ENSMUSP00000106481	10090.ENSMUSP00000079727	0.074	0	0	0	0.313	0.06	0	0.539	0.687
Dld	Mdh1	10090.ENSMUSP00000106481	10090.ENSMUSP00000099938	0.063	0	0	0	0.369	0.051	0	0.359	0.593
Dld	Idh2	10090.ENSMUSP00000106481	10090.ENSMUSP00000103007	0	0	0	0	0.111	0	0	0.385	0.431
Dld	Ldha	10090.ENSMUSP00000106481	10090.ENSMUSP00000103267	0.063	0	0	0	0.15	0.066	0	0.357	0.457
Dld	Tpi1	10090.ENSMUSP00000106481	10090.ENSMUSP00000130858	0.045	0	0	0	0.173	0	0	0.739	0.776
Dld	Sucla2	10090.ENSMUSP00000106481	10090.ENSMUSP00000123765	0.088	0	0	0	0.832	0.096	0	0.484	0.919
Dnajc5	Hspa4	10090.ENSMUSP00000072175	10090.ENSMUSP00000020630	0.043	0	0.327	0	0.145	0.201	0	0.266	0.618
Dnajc5	Hsp90ab1	10090.ENSMUSP00000072175	10090.ENSMUSP00000024739	0	0	0	0	0.144	0.198	0	0.337	0.505
Dnajc5	Hspa9	10090.ENSMUSP00000072175	10090.ENSMUSP00000025217	0.043	0	0.386	0	0.145	0.201	0	0.395	0.712
Dnajc5	Ndufc2	10090.ENSMUSP00000072175	10090.ENSMUSP00000032882	0	0	0	0	0	0	0.9	0	0.9
Dnajc5	Slc32a1	10090.ENSMUSP00000072175	10090.ENSMUSP00000036299	0	0	0	0	0.062	0	0.9	0.216	0.92
Dnajc5	Syn1	10090.ENSMUSP00000072175	10090.ENSMUSP00000111002	0	0	0	0	0.069	0	0	0.455	0.471
Eef2	Hspa4	10090.ENSMUSP00000046101	10090.ENSMUSP00000020630	0.042	0	0	0	0.33	0.123	0	0.245	0.519
Eef2	Hsp90ab1	10090.ENSMUSP00000046101	10090.ENSMUSP00000024739	0	0	0	0	0.435	0.051	0	0.561	0.744
Eef2	Hspa9	10090.ENSMUSP00000046101	10090.ENSMUSP00000025217	0.042	0	0	0	0.334	0.123	0	0.511	0.69
Eef2	Taldo1	10090.ENSMUSP00000046101	10090.ENSMUSP00000026576	0	0	0	0	0.062	0	0	0.476	0.487
Eef2	Hspd1	10090.ENSMUSP00000046101	10090.ENSMUSP00000027123	0	0	0	0	0.159	0.158	0	0.293	0.456
Eef2	Ncl	10090.ENSMUSP00000046101	10090.ENSMUSP00000027438	0	0	0	0	0.329	0.16	0	0.381	0.621
Eef2	Hnrnpa1	10090.ENSMUSP00000046101	10090.ENSMUSP00000042658	0	0	0	0	0.167	0.22	0	0.3	0.505
Eef2	Hnrnpa2b1	10090.ENSMUSP00000046101	10090.ENSMUSP00000110103	0	0	0	0	0.15	0.22	0	0.169	0.401
Eef2	Tpi1	10090.ENSMUSP00000046101	10090.ENSMUSP00000130858	0.042	0	0	0	0.25	0	0	0.665	0.739
Eef2	Eno1	10090.ENSMUSP00000046101	10090.ENSMUSP00000079727	0.076	0	0	0	0.516	0.161	0	0.433	0.759
Eno1	Pdhx	10090.ENSMUSP00000079727	10090.ENSMUSP00000011058	0.076	0	0	0	0.118	0	0	0.376	0.447
Eno1	Hspa4	10090.ENSMUSP00000079727	10090.ENSMUSP00000020630	0	0	0	0	0.123	0.101	0	0.414	0.498
Eno1	Sdha	10090.ENSMUSP00000079727	10090.ENSMUSP00000022062	0	0	0	0	0.092	0.058	0	0.376	0.42
Eno1	Glud1	10090.ENSMUSP00000079727	10090.ENSMUSP00000022322	0.123	0	0	0	0.219	0	0	0.459	0.597
Eno1	Ywhaz	10090.ENSMUSP00000079727	10090.ENSMUSP00000022894	0	0	0	0	0.081	0.22	0	0.408	0.539
Eno1	Hsp90ab1	10090.ENSMUSP00000079727	10090.ENSMUSP00000024739	0.042	0	0	0	0.184	0.049	0	0.474	0.557
Eno1	Hspa9	10090.ENSMUSP00000079727	10090.ENSMUSP00000025217	0	0	0	0	0.27	0.197	0	0.438	0.642
Eno1	Prdx3	10090.ENSMUSP00000079727	10090.ENSMUSP00000025961	0.058	0	0	0	0.144	0.047	0	0.376	0.456
Eno1	Taldo1	10090.ENSMUSP00000079727	10090.ENSMUSP00000026576	0	0	0	0	0.158	0.161	0.8	0.592	0.934
Eno1	Hspd1	10090.ENSMUSP00000079727	10090.ENSMUSP00000027123	0.042	0	0	0	0.228	0.048	0	0.434	0.548
Eno1	Pdha1	10090.ENSMUSP00000079727	10090.ENSMUSP00000033662	0.062	0	0	0	0.145	0	0	0.562	0.619
Eno1	Got2	10090.ENSMUSP00000079727	10090.ENSMUSP00000034097	0	0	0	0	0.588	0	0	0.359	0.725
Eno1	Pygb	10090.ENSMUSP00000079727	10090.ENSMUSP00000035743	0.057	0	0	0	0.457	0	0	0.273	0.595
Eno1	Pcx	10090.ENSMUSP00000079727	10090.ENSMUSP00000063825	0	0	0	0	0.062	0	0	0.509	0.52
Eno1	Ywhae	10090.ENSMUSP00000079727	10090.ENSMUSP00000070993	0	0	0	0	0.087	0.061	0	0.483	0.518
Eno1	Sucla2	10090.ENSMUSP00000079727	10090.ENSMUSP00000123765	0	0	0	0	0.17	0	0	0.37	0.455
Eno1	Idh2	10090.ENSMUSP00000079727	10090.ENSMUSP00000103007	0	0	0	0	0.187	0	0	0.368	0.464
Eno1	Mdh1	10090.ENSMUSP00000079727	10090.ENSMUSP00000099938	0.059	0	0	0	0.509	0.074	0	0.385	0.702
Eno1	Ldha	10090.ENSMUSP00000079727	10090.ENSMUSP00000103267	0.059	0	0	0	0.357	0.161	0	0.752	0.857
Eno1	Tpi1	10090.ENSMUSP00000079727	10090.ENSMUSP00000130858	0.153	0	0.244	0	0.736	0.615	0	0.83	0.986
Ep300	H2afy2	10090.ENSMUSP00000066789	10090.ENSMUSP00000020283	0	0	0	0	0	0.353	0.9	0.127	0.938
Ep300	Hsp90ab1	10090.ENSMUSP00000066789	10090.ENSMUSP00000024739	0	0.009	0	0	0	0.159	0.9	0.26	0.932
Ep300	H2afz	10090.ENSMUSP00000066789	10090.ENSMUSP00000036907	0	0	0	0	0.062	0.2	0.9	0.575	0.963
Ep300	Ptges3	10090.ENSMUSP00000066789	10090.ENSMUSP00000050292	0	0	0	0	0.06	0.05	0.9	0.059	0.904
Ep300	Hist1h4j	10090.ENSMUSP00000066789	10090.ENSMUSP00000085006	0	0	0	0	0.048	0.751	0	0.599	0.896
Ep300	H2afj	10090.ENSMUSP00000066789	10090.ENSMUSP00000074142	0	0	0	0	0	0.42	0.9	0.087	0.942
Ep300	H3f3a	10090.ENSMUSP00000066789	10090.ENSMUSP00000124509	0	0	0	0	0	0.709	0.9	0.354	0.979
Epb4.1l3	Sptan1	10090.ENSMUSP00000108300	10090.ENSMUSP00000097797	0	0	0	0	0.163	0.214	0	0.343	0.53
Epb4.1l3	Sptbn1	10090.ENSMUSP00000108300	10090.ENSMUSP00000099902	0	0	0	0	0.162	0.209	0	0.289	0.488
Etfdh	Sdha	10090.ENSMUSP00000029386	10090.ENSMUSP00000022062	0.041	0	0	0	0.257	0	0	0.356	0.501
Etfdh	Mccc1	10090.ENSMUSP00000029386	10090.ENSMUSP00000029259	0.123	0	0	0	0.312	0	0	0.124	0.425
Etfdh	Pdha1	10090.ENSMUSP00000029386	10090.ENSMUSP00000033662	0	0	0	0	0.134	0	0	0.352	0.415
Etfdh	Mcee	10090.ENSMUSP00000029386	10090.ENSMUSP00000047855	0.042	0	0	0	0.169	0	0	0.426	0.503
Etfdh	Pcca	10090.ENSMUSP00000029386	10090.ENSMUSP00000038763	0.123	0	0	0	0.35	0	0	0.309	0.572
Fahd1	Sdha	10090.ENSMUSP00000055827	10090.ENSMUSP00000022062	0.167	0	0	0	0.12	0	0.8	0.091	0.848
Fahd1	Pcx	10090.ENSMUSP00000055827	10090.ENSMUSP00000063825	0	0	0	0	0.088	0	0	0.448	0.475
Fam213a	Hsp90ab1	10090.ENSMUSP00000022317	10090.ENSMUSP00000024739	0	0	0	0	0	0	0	0.661	0.661
Glud1	Ogdh	10090.ENSMUSP00000022322	10090.ENSMUSP00000003461	0	0	0	0	0.213	0.153	0.8	0.382	0.906
Glud1	Sdha	10090.ENSMUSP00000022322	10090.ENSMUSP00000022062	0.042	0	0	0	0.18	0	0	0.428	0.512
Glud1	Pcca	10090.ENSMUSP00000022322	10090.ENSMUSP00000038763	0.05	0	0	0	0.081	0	0	0.383	0.414
Glud1	Prdx3	10090.ENSMUSP00000022322	10090.ENSMUSP00000025961	0.107	0	0	0	0.129	0	0	0.335	0.438
Glud1	Taldo1	10090.ENSMUSP00000022322	10090.ENSMUSP00000026576	0	0	0	0	0.061	0	0	0.431	0.443
Glud1	Nnt	10090.ENSMUSP00000022322	10090.ENSMUSP00000096753	0.171	0	0	0	0.063	0	0	0.344	0.446
Glud1	Pdha1	10090.ENSMUSP00000022322	10090.ENSMUSP00000033662	0	0	0	0	0.091	0	0	0.415	0.446
Glud1	Hspd1	10090.ENSMUSP00000022322	10090.ENSMUSP00000027123	0.053	0	0	0	0.214	0.047	0	0.335	0.466
Glud1	Ldha	10090.ENSMUSP00000022322	10090.ENSMUSP00000103267	0.059	0	0	0	0.097	0	0	0.526	0.562
Glud1	Gpd2	10090.ENSMUSP00000022322	10090.ENSMUSP00000108237	0.148	0	0	0	0.087	0.227	0	0.409	0.597
Glud1	Tpi1	10090.ENSMUSP00000022322	10090.ENSMUSP00000130858	0.054	0	0	0	0.083	0	0	0.692	0.71
Glud1	Mdh1	10090.ENSMUSP00000022322	10090.ENSMUSP00000099938	0.059	0	0	0	0.12	0	0.8	0.495	0.905
Glud1	Pcx	10090.ENSMUSP00000022322	10090.ENSMUSP00000063825	0	0	0	0	0.062	0.046	0.8	0.576	0.914
Glud1	Idh2	10090.ENSMUSP00000022322	10090.ENSMUSP00000103007	0	0	0	0	0.133	0.197	0.9	0.586	0.967
Glud1	Got2	10090.ENSMUSP00000022322	10090.ENSMUSP00000034097	0	0	0	0	0.14	0.247	0.9	0.712	0.978
Gnai1	Gnao1	10090.ENSMUSP00000074259	10090.ENSMUSP00000114144	0	0	0	0.974	0.134	0.243	0.9	0.613	0.929
Gnao1	Ldha	10090.ENSMUSP00000114144	10090.ENSMUSP00000103267	0	0	0	0	0	0.505	0	0.058	0.514
Got2	Ogdh	10090.ENSMUSP00000034097	10090.ENSMUSP00000003461	0	0	0	0	0.089	0	0.8	0.332	0.867
Got2	Sdha	10090.ENSMUSP00000034097	10090.ENSMUSP00000022062	0	0	0	0	0.163	0.049	0.8	0.446	0.9
Got2	Taldo1	10090.ENSMUSP00000034097	10090.ENSMUSP00000026576	0.077	0	0.211	0	0.633	0.117	0	0.131	0.757
Got2	Hspd1	10090.ENSMUSP00000034097	10090.ENSMUSP00000027123	0.041	0	0	0	0.278	0.08	0	0.359	0.537
Got2	Gpd2	10090.ENSMUSP00000034097	10090.ENSMUSP00000108237	0	0	0	0	0	0	0	0.435	0.435
Got2	Tpi1	10090.ENSMUSP00000034097	10090.ENSMUSP00000130858	0	0	0	0	0.678	0.117	0	0.7	0.907
Got2	Idh2	10090.ENSMUSP00000034097	10090.ENSMUSP00000103007	0	0	0	0	0.597	0.056	0.8	0.416	0.949
Got2	Pcx	10090.ENSMUSP00000034097	10090.ENSMUSP00000063825	0	0	0	0	0.082	0.197	0.9	0.542	0.961
Got2	Ldha	10090.ENSMUSP00000034097	10090.ENSMUSP00000103267	0	0	0	0	0.143	0.092	0.9	0.59	0.963
Got2	Mdh1	10090.ENSMUSP00000034097	10090.ENSMUSP00000099938	0	0	0	0	0.25	0.092	0.9	0.678	0.975
Gpd2	Ogdh	10090.ENSMUSP00000108237	10090.ENSMUSP00000003461	0	0	0	0	0.465	0	0	0.273	0.594
Gpd2	Sdha	10090.ENSMUSP00000108237	10090.ENSMUSP00000022062	0	0	0	0	0.312	0	0	0.39	0.563
Gpd2	Taldo1	10090.ENSMUSP00000108237	10090.ENSMUSP00000026576	0.172	0	0	0	0.138	0	0	0.34	0.488
Gpd2	Pcx	10090.ENSMUSP00000108237	10090.ENSMUSP00000063825	0	0	0	0	0.062	0	0	0.544	0.554
Gpd2	Tpi1	10090.ENSMUSP00000108237	10090.ENSMUSP00000130858	0.189	0	0	0	0	0.226	0	0.69	0.788
H2afj	H2afy2	10090.ENSMUSP00000074142	10090.ENSMUSP00000020283	0	0	0	0.952	0	0.45	0.9	0	0.942
H2afj	H2afz	10090.ENSMUSP00000074142	10090.ENSMUSP00000036907	0	0	0	0.946	0.097	0.445	0.9	0.45	0.946
H2afj	2020-09-08	10090.ENSMUSP00000074142	10090.ENSMUSP00000112920	0	0	0	0	0	0	0	0.548	0.548
H2afj	Hist1h4j	10090.ENSMUSP00000074142	10090.ENSMUSP00000085006	0	0.005	0	0	0.151	0.806	0	0.469	0.904
H2afj	H3f3a	10090.ENSMUSP00000074142	10090.ENSMUSP00000124509	0	0.001	0	0	0.228	0.384	0.9	0.384	0.966
H2afy2	Macrod1	10090.ENSMUSP00000020283	10090.ENSMUSP00000039507	0	0	0.412	0	0	0.263	0	0.36	0.698
H2afy2	Hist1h4j	10090.ENSMUSP00000020283	10090.ENSMUSP00000085006	0	0	0	0	0.158	0.75	0	0.212	0.819
H2afy2	H2afz	10090.ENSMUSP00000020283	10090.ENSMUSP00000036907	0	0	0	0.929	0.121	0.34	0.9	0.626	0.939
H2afy2	H3f3a	10090.ENSMUSP00000020283	10090.ENSMUSP00000124509	0	0	0	0	0.168	0.627	0.9	0.293	0.975
H2afz	Tfam	10090.ENSMUSP00000036907	10090.ENSMUSP00000090086	0	0	0	0	0.147	0.224	0	0.193	0.419
H2afz	Top1	10090.ENSMUSP00000036907	10090.ENSMUSP00000105094	0	0	0	0	0.083	0.154	0	0.371	0.47
H2afz	Hist1h4j	10090.ENSMUSP00000036907	10090.ENSMUSP00000085006	0	0.003	0	0	0.142	0.948	0	0.707	0.985
H2afz	H3f3a	10090.ENSMUSP00000036907	10090.ENSMUSP00000124509	0	0.001	0	0	0.21	0.964	0.9	0.597	0.998
H3f3a	Hist1h4j	10090.ENSMUSP00000124509	10090.ENSMUSP00000085006	0	0.009	0	0	0.149	0.955	0.72	0.577	0.994
H3f3a	Idh2	10090.ENSMUSP00000124509	10090.ENSMUSP00000103007	0	0	0	0	0.088	0	0	0.493	0.518
Hba-a1	Hbb-bt	10090.ENSMUSP00000090897	10090.ENSMUSP00000095794	0	0	0	0.891	0.403	0.939	0.8	0.669	0.992
Hist1h4j	Hsp90ab1	10090.ENSMUSP00000085006	10090.ENSMUSP00000024739	0	0	0	0	0.061	0.049	0	0.45	0.466
Hnrnpa1	Hsp90ab1	10090.ENSMUSP00000042658	10090.ENSMUSP00000024739	0	0	0	0	0.212	0.155	0	0.284	0.482
Hnrnpa1	Ncl	10090.ENSMUSP00000042658	10090.ENSMUSP00000027438	0	0	0	0.642	0.432	0.198	0	0.609	0.626
Hnrnpa1	Hnrnpa2b1	10090.ENSMUSP00000042658	10090.ENSMUSP00000110103	0	0	0.44	0.965	0.502	0.614	0.9	0.734	0.979
Hnrnpa2b1	Hspd1	10090.ENSMUSP00000110103	10090.ENSMUSP00000027123	0	0	0	0	0.268	0.162	0	0.157	0.438
Hnrnpa2b1	Ncl	10090.ENSMUSP00000110103	10090.ENSMUSP00000027438	0	0	0	0.628	0.317	0.198	0	0.348	0.497
Hsp90ab1	Hspa4	10090.ENSMUSP00000024739	10090.ENSMUSP00000020630	0	0	0	0	0.455	0.691	0	0.758	0.955
Hsp90ab1	Rock2	10090.ENSMUSP00000024739	10090.ENSMUSP00000020904	0	0	0	0	0	0.198	0	0.29	0.406
Hsp90ab1	Sdha	10090.ENSMUSP00000024739	10090.ENSMUSP00000022062	0.044	0	0	0	0.062	0.046	0	0.395	0.413
Hsp90ab1	Ywhaz	10090.ENSMUSP00000024739	10090.ENSMUSP00000022894	0	0	0	0	0.132	0.093	0	0.388	0.476
Hsp90ab1	Prdx3	10090.ENSMUSP00000024739	10090.ENSMUSP00000025961	0.042	0	0	0	0.102	0	0	0.363	0.405
Hsp90ab1	Ywhag	10090.ENSMUSP00000024739	10090.ENSMUSP00000051223	0	0	0	0	0.108	0.093	0	0.337	0.417
Hsp90ab1	Slc1a2	10090.ENSMUSP00000024739	10090.ENSMUSP00000079100	0	0	0	0	0	0	0	0.439	0.44
Hsp90ab1	Ldha	10090.ENSMUSP00000024739	10090.ENSMUSP00000103267	0.042	0	0	0	0.141	0.047	0	0.41	0.476
Hsp90ab1	Ncl	10090.ENSMUSP00000024739	10090.ENSMUSP00000027438	0	0	0	0	0.193	0.073	0	0.358	0.478
Hsp90ab1	Ppp3ca	10090.ENSMUSP00000024739	10090.ENSMUSP00000053101	0	0	0	0	0	0.354	0	0.267	0.506
Hsp90ab1	Ywhae	10090.ENSMUSP00000024739	10090.ENSMUSP00000070993	0	0	0	0	0.201	0.114	0	0.382	0.525
Hsp90ab1	Tpi1	10090.ENSMUSP00000024739	10090.ENSMUSP00000130858	0	0	0	0	0.141	0.199	0	0.446	0.586
Hsp90ab1	Hspa9	10090.ENSMUSP00000024739	10090.ENSMUSP00000025217	0	0	0	0	0.518	0.291	0	0.774	0.916
Hsp90ab1	Rac1	10090.ENSMUSP00000024739	10090.ENSMUSP00000079380	0	0	0	0	0	0.071	0.9	0.302	0.929
Hsp90ab1	Hspd1	10090.ENSMUSP00000024739	10090.ENSMUSP00000027123	0	0	0	0	0.814	0.702	0	0.853	0.991
Hsp90ab1	Ptges3	10090.ENSMUSP00000024739	10090.ENSMUSP00000050292	0	0	0	0	0.529	0.783	0.9	0.846	0.998
Hspa4	Ncl	10090.ENSMUSP00000020630	10090.ENSMUSP00000027438	0	0	0	0	0.246	0.118	0	0.201	0.422
Hspa4	Ptges3	10090.ENSMUSP00000020630	10090.ENSMUSP00000050292	0	0	0	0	0.253	0.101	0	0.382	0.549
Hspa4	Hspd1	10090.ENSMUSP00000020630	10090.ENSMUSP00000027123	0.045	0	0	0	0.453	0.232	0	0.706	0.866
Hspa4	Hspa9	10090.ENSMUSP00000020630	10090.ENSMUSP00000025217	0	0	0.421	0.701	0.659	0.179	0.9	0.712	0.978
Hspa9	Sdha	10090.ENSMUSP00000025217	10090.ENSMUSP00000022062	0	0	0	0	0.12	0.346	0	0.431	0.644
Hspa9	Ywhaz	10090.ENSMUSP00000025217	10090.ENSMUSP00000022894	0	0	0	0	0.062	0.287	0	0.274	0.472
Hspa9	Ncl	10090.ENSMUSP00000025217	10090.ENSMUSP00000027438	0	0	0	0	0.259	0.159	0	0.148	0.423
Hspa9	Tfam	10090.ENSMUSP00000025217	10090.ENSMUSP00000090086	0	0	0	0	0.094	0.072	0	0.396	0.448
Hspa9	Immt	10090.ENSMUSP00000025217	10090.ENSMUSP00000066181	0	0	0	0	0.218	0.057	0	0.318	0.453
Hspa9	Prdx3	10090.ENSMUSP00000025217	10090.ENSMUSP00000025961	0	0	0	0	0.131	0.093	0	0.431	0.513
Hspa9	Iba57	10090.ENSMUSP00000025217	10090.ENSMUSP00000049823	0	0	0	0	0	0	0	0.521	0.521
Hspa9	Ywhae	10090.ENSMUSP00000025217	10090.ENSMUSP00000070993	0	0	0	0	0.062	0.145	0	0.453	0.523
Hspa9	Lrpprc	10090.ENSMUSP00000025217	10090.ENSMUSP00000107927	0	0	0	0	0.385	0.046	0	0.274	0.537
Hspa9	Slc25a3	10090.ENSMUSP00000025217	10090.ENSMUSP00000075987	0	0	0	0	0.156	0.056	0	0.529	0.592
Hspa9	Ptges3	10090.ENSMUSP00000025217	10090.ENSMUSP00000050292	0	0	0	0	0.496	0.101	0	0.187	0.599
Hspa9	Tpi1	10090.ENSMUSP00000025217	10090.ENSMUSP00000130858	0.057	0	0	0	0.191	0.116	0	0.656	0.737
Hspa9	Hspd1	10090.ENSMUSP00000025217	10090.ENSMUSP00000027123	0.045	0	0	0	0.917	0.661	0	0.854	0.995
Hspd1	Sdha	10090.ENSMUSP00000027123	10090.ENSMUSP00000022062	0	0	0	0	0.099	0.198	0	0.59	0.678
Hspd1	Prdx3	10090.ENSMUSP00000027123	10090.ENSMUSP00000025961	0	0	0	0	0.266	0.051	0	0.444	0.579
Hspd1	Sucla2	10090.ENSMUSP00000027123	10090.ENSMUSP00000123765	0	0	0	0	0.181	0.092	0	0.262	0.404
Hspd1	Mdh1	10090.ENSMUSP00000027123	10090.ENSMUSP00000099938	0	0	0	0	0.093	0.2	0	0.245	0.405
Hspd1	Tfam	10090.ENSMUSP00000027123	10090.ENSMUSP00000090086	0	0	0	0	0.124	0.051	0	0.403	0.46
Hspd1	Ldha	10090.ENSMUSP00000027123	10090.ENSMUSP00000103267	0	0	0	0	0.247	0.2	0	0.23	0.495
Hspd1	Lrpprc	10090.ENSMUSP00000027123	10090.ENSMUSP00000107927	0	0	0	0	0.443	0.051	0	0.207	0.544
Hspd1	Tpi1	10090.ENSMUSP00000027123	10090.ENSMUSP00000130858	0	0	0	0	0.154	0	0	0.495	0.555
Hspd1	Ncl	10090.ENSMUSP00000027123	10090.ENSMUSP00000027438	0	0	0	0	0.523	0	0	0.127	0.566
Hspd1	Ptges3	10090.ENSMUSP00000027123	10090.ENSMUSP00000050292	0	0	0	0	0.365	0	0	0.432	0.624
Idh2	Ogdh	10090.ENSMUSP00000103007	10090.ENSMUSP00000003461	0	0	0	0	0.239	0	0.9	0.687	0.974
Idh2	Pdhx	10090.ENSMUSP00000103007	10090.ENSMUSP00000011058	0	0	0	0	0.139	0	0	0.345	0.412
Idh2	Sdha	10090.ENSMUSP00000103007	10090.ENSMUSP00000022062	0.108	0	0	0	0.141	0.046	0	0.749	0.792
Idh2	Taldo1	10090.ENSMUSP00000103007	10090.ENSMUSP00000026576	0.084	0	0	0	0.073	0.077	0	0.362	0.433
Idh2	Pdha1	10090.ENSMUSP00000103007	10090.ENSMUSP00000033662	0	0	0	0	0.082	0	0	0.508	0.529
Idh2	Pcx	10090.ENSMUSP00000103007	10090.ENSMUSP00000063825	0.041	0	0	0	0.065	0	0	0.668	0.676
Idh2	Slc25a3	10090.ENSMUSP00000103007	10090.ENSMUSP00000075987	0	0	0	0	0.253	0	0	0.387	0.523
Idh2	Nnt	10090.ENSMUSP00000103007	10090.ENSMUSP00000096753	0	0	0	0	0.099	0	0	0.636	0.658
Idh2	Mdh1	10090.ENSMUSP00000103007	10090.ENSMUSP00000099938	0.085	0	0	0	0.18	0.2	0	0.549	0.693
Idh2	Tpi1	10090.ENSMUSP00000103007	10090.ENSMUSP00000130858	0	0	0	0	0.136	0	0	0.511	0.559
Idh2	Ldha	10090.ENSMUSP00000103007	10090.ENSMUSP00000103267	0.085	0	0	0	0.186	0.2	0	0.575	0.713
Idh2	Sucla2	10090.ENSMUSP00000103007	10090.ENSMUSP00000123765	0.139	0	0	0	0.168	0	0	0.706	0.771
Immt	Sdha	10090.ENSMUSP00000066181	10090.ENSMUSP00000022062	0	0	0	0	0.218	0.058	0	0.366	0.492
Immt	Slc25a3	10090.ENSMUSP00000066181	10090.ENSMUSP00000075987	0	0	0	0	0.28	0.058	0	0.261	0.455
Immt	Sucla2	10090.ENSMUSP00000066181	10090.ENSMUSP00000123765	0	0	0	0	0.267	0	0	0.373	0.52
Immt	Tfam	10090.ENSMUSP00000066181	10090.ENSMUSP00000090086	0	0	0	0	0.061	0.05	0	0.606	0.617
Ldha	Ogdh	10090.ENSMUSP00000103267	10090.ENSMUSP00000003461	0.076	0	0	0	0.17	0	0	0.357	0.464
Ldha	Sdha	10090.ENSMUSP00000103267	10090.ENSMUSP00000022062	0.119	0	0	0	0.152	0.1	0	0.522	0.635
Ldha	Taldo1	10090.ENSMUSP00000103267	10090.ENSMUSP00000026576	0.043	0	0	0	0.102	0.179	0.8	0.545	0.924
Ldha	Pdha1	10090.ENSMUSP00000103267	10090.ENSMUSP00000033662	0.043	0	0	0	0.144	0.179	0.65	0.577	0.882
Ldha	Pygb	10090.ENSMUSP00000103267	10090.ENSMUSP00000035743	0	0	0	0	0.108	0	0	0.448	0.487
Ldha	Pdk3	10090.ENSMUSP00000103267	10090.ENSMUSP00000036604	0.042	0	0	0	0.062	0	0	0.573	0.583
Ldha	Pcx	10090.ENSMUSP00000103267	10090.ENSMUSP00000063825	0.056	0	0	0	0.062	0.197	0.9	0.635	0.969
Ldha	Tfam	10090.ENSMUSP00000103267	10090.ENSMUSP00000090086	0	0	0	0	0.06	0.05	0	0.408	0.425
Ldha	Mdh1	10090.ENSMUSP00000103267	10090.ENSMUSP00000099938	0	0	0	0	0.081	0.197	0	0.51	0.606
Ldha	Sucla2	10090.ENSMUSP00000103267	10090.ENSMUSP00000123765	0.076	0	0	0	0.158	0.076	0	0.27	0.405
Ldha	Lrpprc	10090.ENSMUSP00000103267	10090.ENSMUSP00000107927	0	0	0	0	0.06	0	0	0.402	0.414
Ldha	Tpi1	10090.ENSMUSP00000103267	10090.ENSMUSP00000130858	0.059	0	0	0	0.711	0.179	0	0.784	0.945
Lrpprc	Tfam	10090.ENSMUSP00000107927	10090.ENSMUSP00000090086	0	0	0	0	0.115	0	0	0.498	0.537
Mccc1	Mcee	10090.ENSMUSP00000029259	10090.ENSMUSP00000047855	0.139	0	0	0	0.062	0	0	0.423	0.493
Mccc1	Pcx	10090.ENSMUSP00000029259	10090.ENSMUSP00000063825	0	0	0.264	0.824	0.06	0	0.9	0.728	0.917
Mccc1	Pcca	10090.ENSMUSP00000029259	10090.ENSMUSP00000038763	0	0	0.443	0.878	0.133	0	0.9	0.846	0.923
Mcee	Taldo1	10090.ENSMUSP00000047855	10090.ENSMUSP00000026576	0.082	0	0	0	0.262	0.118	0	0.355	0.563
Mcee	Pcca	10090.ENSMUSP00000047855	10090.ENSMUSP00000038763	0.139	0	0	0	0.112	0	0.9	0.796	0.982
Mcee	Tpi1	10090.ENSMUSP00000047855	10090.ENSMUSP00000130858	0.111	0	0	0	0.098	0	0	0.404	0.48
Mdh1	Ogdh	10090.ENSMUSP00000099938	10090.ENSMUSP00000003461	0.076	0	0	0	0.17	0	0	0.314	0.428
Mdh1	Sdha	10090.ENSMUSP00000099938	10090.ENSMUSP00000022062	0.119	0	0	0	0.366	0.197	0	0.557	0.775
Mdh1	Ndufa5	10090.ENSMUSP00000099938	10090.ENSMUSP00000023851	0	0	0	0	0.343	0	0	0.157	0.422
Mdh1	Taldo1	10090.ENSMUSP00000099938	10090.ENSMUSP00000026576	0.043	0	0	0	0.151	0.101	0	0.373	0.481
Mdh1	Pura	10090.ENSMUSP00000099938	10090.ENSMUSP00000059404	0	0	0	0	0	0	0	0.647	0.647
Mdh1	Pcx	10090.ENSMUSP00000099938	10090.ENSMUSP00000063825	0.056	0	0	0	0.084	0.197	0.9	0.594	0.966
Mdh1	Slc25a3	10090.ENSMUSP00000099938	10090.ENSMUSP00000075987	0	0	0	0	0.765	0	0	0.127	0.786
Mdh1	Sucla2	10090.ENSMUSP00000099938	10090.ENSMUSP00000123765	0.076	0	0	0	0.332	0.076	0	0.177	0.468
Mdh1	Tpi1	10090.ENSMUSP00000099938	10090.ENSMUSP00000130858	0.059	0	0	0	0.257	0.102	0	0.658	0.756
Ncl	Top1	10090.ENSMUSP00000027438	10090.ENSMUSP00000105094	0	0	0	0	0.124	0.197	0	0.296	0.462
Ndufa5	Uqcrb	10090.ENSMUSP00000023851	10090.ENSMUSP00000021993	0	0	0	0	0.923	0.642	0.9	0.473	0.998
Ndufa5	Sdha	10090.ENSMUSP00000023851	10090.ENSMUSP00000022062	0	0	0	0	0.091	0	0	0.608	0.629
Ndufa5	Ndufb4	10090.ENSMUSP00000023851	10090.ENSMUSP00000023514	0	0	0	0	0.701	0.947	0.9	0.575	0.999
Ndufa5	Prdx3	10090.ENSMUSP00000023851	10090.ENSMUSP00000025961	0	0	0	0	0.229	0	0	0.269	0.413
Ndufa5	Ppa2	10090.ENSMUSP00000023851	10090.ENSMUSP00000029644	0	0	0	0	0.178	0	0	0.409	0.494
Ndufa5	Uqcr10	10090.ENSMUSP00000023851	10090.ENSMUSP00000054856	0	0	0	0	0.846	0.74	0.9	0.468	0.997
Ndufa5	Ndufc2	10090.ENSMUSP00000023851	10090.ENSMUSP00000032882	0	0	0	0	0.839	0.919	0.9	0.727	0.999
Ndufb4	Uqcrb	10090.ENSMUSP00000023514	10090.ENSMUSP00000021993	0	0	0	0	0.653	0.65	0.9	0.149	0.988
Ndufb4	Uqcr10	10090.ENSMUSP00000023514	10090.ENSMUSP00000054856	0	0	0	0	0.605	0.77	0.9	0.425	0.994
Ndufb4	Ndufc2	10090.ENSMUSP00000023514	10090.ENSMUSP00000032882	0	0	0	0	0.503	0.938	0.9	0.521	0.998
Ndufc2	Uqcrb	10090.ENSMUSP00000032882	10090.ENSMUSP00000021993	0	0	0	0	0.808	0.6	0.9	0.143	0.992
Ndufc2	Sdha	10090.ENSMUSP00000032882	10090.ENSMUSP00000022062	0	0	0	0	0.098	0	0	0.408	0.443
Ndufc2	Ppa2	10090.ENSMUSP00000032882	10090.ENSMUSP00000029644	0	0	0	0	0.112	0	0	0.394	0.439
Ndufc2	Uqcr10	10090.ENSMUSP00000032882	10090.ENSMUSP00000054856	0	0	0	0	0.849	0.734	0.9	0.413	0.997
Ogdh	Taldo1	10090.ENSMUSP00000003461	10090.ENSMUSP00000026576	0	0	0	0	0	0	0	0.401	0.401
Ogdh	Tpi1	10090.ENSMUSP00000003461	10090.ENSMUSP00000130858	0.053	0	0	0	0.078	0	0	0.414	0.444
Ogdh	Slc25a3	10090.ENSMUSP00000003461	10090.ENSMUSP00000075987	0	0	0	0	0.312	0.22	0	0.12	0.486
Ogdh	Pcx	10090.ENSMUSP00000003461	10090.ENSMUSP00000063825	0.041	0	0	0	0.082	0	0	0.538	0.558
Ogdh	Sucla2	10090.ENSMUSP00000003461	10090.ENSMUSP00000123765	0.113	0	0	0	0.311	0.184	0	0.731	0.848
Ogdh	Sdha	10090.ENSMUSP00000003461	10090.ENSMUSP00000022062	0.17	0	0	0	0.494	0	0	0.69	0.858
Ogdh	Pdhx	10090.ENSMUSP00000003461	10090.ENSMUSP00000011058	0.098	0	0.245	0	0.268	0.682	0.9	0.33	0.986
Ogdh	Pdha1	10090.ENSMUSP00000003461	10090.ENSMUSP00000033662	0	0	0	0	0.097	0.704	0.9	0.666	0.989
Pcca	Pcx	10090.ENSMUSP00000038763	10090.ENSMUSP00000063825	0	0	0.297	0.825	0.062	0	0.9	0.686	0.917
Pcx	Pdhx	10090.ENSMUSP00000063825	10090.ENSMUSP00000011058	0.06	0	0	0	0.062	0	0	0.533	0.552
Pcx	Sdha	10090.ENSMUSP00000063825	10090.ENSMUSP00000022062	0.156	0	0	0	0.062	0	0	0.548	0.61
Pcx	Taldo1	10090.ENSMUSP00000063825	10090.ENSMUSP00000026576	0	0	0	0	0.062	0	0	0.726	0.732
Pcx	Pdha1	10090.ENSMUSP00000063825	10090.ENSMUSP00000033662	0	0	0	0	0.118	0	0.9	0.586	0.96
Pcx	Pygb	10090.ENSMUSP00000063825	10090.ENSMUSP00000035743	0	0	0	0	0.08	0	0	0.382	0.407
Pcx	Slc1a2	10090.ENSMUSP00000063825	10090.ENSMUSP00000079100	0	0	0	0	0	0	0	0.422	0.422
Pcx	Tpi1	10090.ENSMUSP00000063825	10090.ENSMUSP00000130858	0	0	0	0	0.062	0	0	0.749	0.754
Pdha1	Pdhx	10090.ENSMUSP00000033662	10090.ENSMUSP00000011058	0	0	0.434	0	0.579	0.668	0.9	0.683	0.997
Pdha1	Sdha	10090.ENSMUSP00000033662	10090.ENSMUSP00000022062	0.041	0	0	0	0.195	0.197	0	0.659	0.76
Pdha1	Prdx3	10090.ENSMUSP00000033662	10090.ENSMUSP00000025961	0	0	0	0	0.197	0.05	0	0.391	0.495
Pdha1	Taldo1	10090.ENSMUSP00000033662	10090.ENSMUSP00000026576	0	0	0	0	0.083	0	0.8	0.371	0.874
Pdha1	Ppa2	10090.ENSMUSP00000033662	10090.ENSMUSP00000029644	0.077	0	0	0	0.089	0	0	0.354	0.409
Pdha1	Tpi1	10090.ENSMUSP00000033662	10090.ENSMUSP00000130858	0.076	0	0	0	0.112	0.049	0	0.571	0.621
Pdha1	Sucla2	10090.ENSMUSP00000033662	10090.ENSMUSP00000123765	0	0	0	0	0.348	0.05	0	0.632	0.752
Pdha1	Pdk3	10090.ENSMUSP00000033662	10090.ENSMUSP00000036604	0	0	0	0	0.065	0.736	0.9	0.556	0.987
Pdhx	Tpi1	10090.ENSMUSP00000011058	10090.ENSMUSP00000130858	0.115	0	0	0	0.061	0	0	0.435	0.49
Pdhx	Slc25a3	10090.ENSMUSP00000011058	10090.ENSMUSP00000075987	0	0	0	0	0.316	0.197	0	0.212	0.529
Pdhx	Sucla2	10090.ENSMUSP00000011058	10090.ENSMUSP00000123765	0.098	0	0	0	0.287	0.154	0	0.239	0.53
Pdhx	Sdha	10090.ENSMUSP00000011058	10090.ENSMUSP00000022062	0.164	0	0	0	0.311	0	0	0.374	0.608
Pdhx	Pdk3	10090.ENSMUSP00000011058	10090.ENSMUSP00000036604	0	0	0	0	0.06	0.701	0.9	0.316	0.978
Pdk3	Top1	10090.ENSMUSP00000036604	10090.ENSMUSP00000105094	0	0	0	0	0	0	0	0.421	0.42
Ppa2	Taldo1	10090.ENSMUSP00000029644	10090.ENSMUSP00000026576	0.084	0	0	0	0.211	0	0	0.274	0.429
Ppp3ca	Ywhaz	10090.ENSMUSP00000053101	10090.ENSMUSP00000022894	0	0	0	0	0.087	0.365	0	0.101	0.434
Prdx3	Sdha	10090.ENSMUSP00000025961	10090.ENSMUSP00000022062	0.058	0	0	0	0.151	0.148	0	0.229	0.404
Prdx3	Tpi1	10090.ENSMUSP00000025961	10090.ENSMUSP00000130858	0.043	0	0	0	0.231	0.123	0	0.434	0.586
Psat1	Taldo1	10090.ENSMUSP00000025542	10090.ENSMUSP00000026576	0.057	0	0	0	0.061	0.201	0	0.258	0.405
Psat1	Tpi1	10090.ENSMUSP00000025542	10090.ENSMUSP00000130858	0.168	0	0	0	0.078	0	0	0.559	0.632
Ptges3	Ywhae	10090.ENSMUSP00000050292	10090.ENSMUSP00000070993	0	0	0	0	0.429	0.06	0	0.062	0.454
Ptges3	2020-09-07	10090.ENSMUSP00000050292	10090.ENSMUSP00000110927	0	0	0	0	0.335	0.212	0	0.062	0.466
Pygb	Tpi1	10090.ENSMUSP00000035743	10090.ENSMUSP00000130858	0	0	0	0	0.516	0	0	0.479	0.737
Rac1	Rock2	10090.ENSMUSP00000079380	10090.ENSMUSP00000020904	0	0	0	0	0	0.177	0	0.649	0.699
Sdha	Uqcrb	10090.ENSMUSP00000022062	10090.ENSMUSP00000021993	0	0	0	0	0.12	0.436	0.9	0.523	0.973
Sdha	Slc25a3	10090.ENSMUSP00000022062	10090.ENSMUSP00000075987	0	0	0	0	0.338	0.06	0	0.136	0.415
Sdha	Taldo1	10090.ENSMUSP00000022062	10090.ENSMUSP00000026576	0	0	0	0	0.073	0	0	0.457	0.475
Sdha	Top1	10090.ENSMUSP00000022062	10090.ENSMUSP00000105094	0	0.325	0	0	0.062	0	0	0.308	0.524
Sdha	Tfam	10090.ENSMUSP00000022062	10090.ENSMUSP00000090086	0	0	0	0	0.062	0	0	0.634	0.642
Sdha	Tpi1	10090.ENSMUSP00000022062	10090.ENSMUSP00000130858	0.187	0	0	0	0.149	0	0	0.563	0.672
Sdha	Ywhaz	10090.ENSMUSP00000022062	10090.ENSMUSP00000022894	0	0	0	0	0.061	0.09	0	0.76	0.777
Sdha	Uqcr10	10090.ENSMUSP00000022062	10090.ENSMUSP00000054856	0	0	0	0	0.13	0	0.9	0.442	0.947
Sdha	Sucla2	10090.ENSMUSP00000022062	10090.ENSMUSP00000123765	0.17	0	0	0	0.633	0.197	0.65	0.659	0.965
2020-09-11	2020-09-08	10090.ENSMUSP00000074293	10090.ENSMUSP00000112920	0	0	0	0.979	0.089	0.777	0	0.884	0.792
2020-09-11	2020-09-07	10090.ENSMUSP00000074293	10090.ENSMUSP00000110927	0	0	0	0.896	0.495	0.77	0	0.824	0.889
2020-09-07	2020-09-08	10090.ENSMUSP00000110927	10090.ENSMUSP00000112920	0	0	0	0.898	0.13	0.785	0	0.886	0.822
Sh3gl2	Syn1	10090.ENSMUSP00000030212	10090.ENSMUSP00000111002	0	0	0	0	0.204	0.459	0	0.239	0.644
Slc12a2	Slc32a1	10090.ENSMUSP00000111023	10090.ENSMUSP00000036299	0	0	0	0	0	0.049	0	0.486	0.49
Slc12a2	Slc1a2	10090.ENSMUSP00000111023	10090.ENSMUSP00000079100	0.041	0	0	0	0.062	0.181	0	0.369	0.473
Slc1a2	Slc32a1	10090.ENSMUSP00000079100	10090.ENSMUSP00000036299	0.042	0	0	0	0.334	0.095	0	0.373	0.59
Slc1a2	Syn1	10090.ENSMUSP00000079100	10090.ENSMUSP00000111002	0	0	0	0	0.164	0	0	0.356	0.439
Slc25a3	Uqcrb	10090.ENSMUSP00000075987	10090.ENSMUSP00000021993	0	0	0	0	0.628	0	0	0	0.628
Slc25a3	Sucla2	10090.ENSMUSP00000075987	10090.ENSMUSP00000123765	0	0	0	0	0.313	0	0	0.309	0.505
Slc32a1	Syn1	10090.ENSMUSP00000036299	10090.ENSMUSP00000111002	0	0	0	0	0.248	0	0	0.682	0.751
Sptan1	Sptbn1	10090.ENSMUSP00000097797	10090.ENSMUSP00000099902	0	0	0	0.694	0.825	0.791	0.9	0.844	0.997
Sucla2	Tpi1	10090.ENSMUSP00000123765	10090.ENSMUSP00000130858	0.042	0	0	0	0.135	0	0	0.344	0.409
Taldo1	Tpi1	10090.ENSMUSP00000026576	10090.ENSMUSP00000130858	0.17	0	0	0	0.153	0	0.8	0.839	0.974
Tpi1	Ywhaz	10090.ENSMUSP00000130858	10090.ENSMUSP00000022894	0	0	0	0	0.062	0.204	0	0.291	0.424
Uqcr10	Uqcrb	10090.ENSMUSP00000054856	10090.ENSMUSP00000021993	0	0	0	0	0.835	0.796	0.9	0.742	0.999
Ywhae	Ywhaz	10090.ENSMUSP00000070993	10090.ENSMUSP00000022894	0	0	0	0.967	0.238	0.753	0.9	0.83	0.98
Ywhae	Ywhag	10090.ENSMUSP00000070993	10090.ENSMUSP00000051223	0	0	0	0.962	0.203	0.731	0.9	0.72	0.977
Ywhae	Ywhaq	10090.ENSMUSP00000070993	10090.ENSMUSP00000100067	0	0	0	0.963	0.19	0.045	0.9	0.69	0.917
Ywhag	Ywhaz	10090.ENSMUSP00000051223	10090.ENSMUSP00000022894	0	0	0	0.973	0.168	0.784	0.9	0.7	0.98
Ywhag	Ywhaq	10090.ENSMUSP00000051223	10090.ENSMUSP00000100067	0	0	0	0.97	0.079	0	0.9	0.699	0.905
Ywhaq	Ywhaz	10090.ENSMUSP00000100067	10090.ENSMUSP00000022894	0	0	0	0.979	0.278	0	0.9	0.692	0.925
